# Supplementary material
Source: MDPI journal article supplement (https://www.mdpi.com/2304-6740/6/2/56)

# checkCIF/PLATON report

Structure factors have been supplied for datablock(s) d1789a\_a\_sq

THIS REPORT IS FOR GUIDANCE ONLY. IF USED AS PART OF A REVIEW PROCEDURE FOR PUBLICATION, IT SHOULD NOT REPLACE THE EXPERTISE OF AN EXPERIENCED CRYSTALLOGRAPHIC REFEREE.

No syntax errors found.      CIF dictionary      Interpreting this report

## Datablock: d1789a\_a\_sq

---

|                 |                                 |                                  |
|-----------------|---------------------------------|----------------------------------|
| Bond precision: | C-C = 0.0148 A                  | Wavelength=0.71073               |
| Cell:           | a=17.0922(15)                   | b=22.4119(17)      c=15.7288(14) |
|                 | alpha=90                        | beta=92.427(3)      gamma=90     |
| Temperature:    | 150 K                           |                                  |
|                 | Calculated                      | Reported                         |
| Volume          | 6019.8(9)                       | 6019.8(9)                        |
| Space group     | C 2/c                           | C 2/c                            |
| Hall group      | -C 2yc                          | -C 2yc                           |
| Moiety formula  | C69 H42 Ho N9 O3 [+<br>solvent] | C69 H42 Ho N9 O3                 |
| Sum formula     | C69 H42 Ho N9 O3 [+<br>solvent] | C69 H42 Ho N9 O3                 |
| Mr              | 1210.05                         | 1210.04                          |
| Dx, g cm-3      | 1.335                           | 1.335                            |
| Z               | 4                               | 4                                |
| Mu (mm-1)       | 1.368                           | 1.368                            |
| F000            | 2440.0                          | 2440.0                           |
| F000'           | 2439.89                         |                                  |
| h,k,lmax        | 22,29,20                        | 22,29,20                         |
| Nref            | 6973                            | 6963                             |
| Tmin,Tmax       | 0.821,0.872                     | 0.631,0.746                      |
| Tmin'           | 0.740                           |                                  |

Correction method= # Reported T Limits: Tmin=0.631 Tmax=0.746  
AbsCorr = MULTI-SCAN

Data completeness= 0.999      Theta(max)= 27.549

R(reflections)= 0.1087( 5145)      wR2(reflections)= 0.2178( 6963)

S = 1.370      Npar= 492

---

The following ALERTS were generated. Each ALERT has the format

**test-name\_ALERT\_alert-type\_alert-level.**

Click on the hyperlinks for more details of the test.

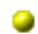

#### Alert level C

|                   |                                                  |         |        |
|-------------------|--------------------------------------------------|---------|--------|
| PLAT082_ALERT_2_C | High R1 Value .....                              | 0.11    | Report |
| PLAT215_ALERT_3_C | Disordered C7A has ADP max/min Ratio .....       | 3.1     | Note   |
| PLAT241_ALERT_2_C | High 'MainMol' Ueq as Compared to Neighbors of   | 01      | Check  |
| PLAT250_ALERT_2_C | Large U3/U1 Ratio for Average U(i,j) Tensor .... | 3.0     | Note   |
| PLAT342_ALERT_3_C | Low Bond Precision on C-C Bonds .....            | 0.01484 | Ang.   |
| PLAT906_ALERT_3_C | Large K value in the Analysis of Variance .....  | 17.484  | Check  |
| PLAT906_ALERT_3_C | Large K value in the Analysis of Variance .....  | 5.158   | Check  |
| PLAT906_ALERT_3_C | Large K value in the Analysis of Variance .....  | 2.558   | Check  |
| PLAT934_ALERT_3_C | Number of (Iobs-Icalc)/SigmaW > 10 Outliers .... | 1       | Check  |
| PLAT977_ALERT_2_C | Check the Negative Difference Density on H18A    | -0.41   | eA-3   |

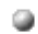

#### Alert level G

|                   |                                                  |        |        |
|-------------------|--------------------------------------------------|--------|--------|
| PLAT002_ALERT_2_G | Number of Distance or Angle Restraints on AtSite | 55     | Note   |
| PLAT003_ALERT_2_G | Number of Uiso or Uij Restrained non-H Atoms ... | 27     | Report |
| PLAT083_ALERT_2_G | SHELXL Second Parameter in WGHT Unusually Large  | 117.98 | Why ?  |
| PLAT175_ALERT_4_G | The CIF-Embedded .res File Contains SAME Records | 1      | Report |
| PLAT176_ALERT_4_G | The CIF-Embedded .res File Contains SADI Records | 3      | Report |
| PLAT187_ALERT_4_G | The CIF-Embedded .res File Contains RIGU Records | 1      | Report |
| PLAT232_ALERT_2_G | Hirshfeld Test Diff (M-X) Ho1 -- N3 ..           | 6.5    | s.u.   |
| PLAT300_ALERT_4_G | Atom Site Occupancy of O1A is Constrained at     | 0.5    | Check  |
| PLAT300_ALERT_4_G | Atom Site Occupancy of N1A is Constrained at     | 0.5    | Check  |
| PLAT300_ALERT_4_G | Atom Site Occupancy of N2A is Constrained at     | 0.5    | Check  |
| PLAT300_ALERT_4_G | Atom Site Occupancy of N3A is Constrained at     | 0.5    | Check  |
| PLAT300_ALERT_4_G | Atom Site Occupancy of C1A is Constrained at     | 0.5    | Check  |
| PLAT300_ALERT_4_G | Atom Site Occupancy of C2A is Constrained at     | 0.5    | Check  |
| PLAT300_ALERT_4_G | Atom Site Occupancy of C3A is Constrained at     | 0.5    | Check  |
| PLAT300_ALERT_4_G | Atom Site Occupancy of C4A is Constrained at     | 0.5    | Check  |
| PLAT300_ALERT_4_G | Atom Site Occupancy of C5A is Constrained at     | 0.5    | Check  |
| PLAT300_ALERT_4_G | Atom Site Occupancy of C6A is Constrained at     | 0.5    | Check  |
| PLAT300_ALERT_4_G | Atom Site Occupancy of C7A is Constrained at     | 0.5    | Check  |
| PLAT300_ALERT_4_G | Atom Site Occupancy of C8A is Constrained at     | 0.5    | Check  |
| PLAT300_ALERT_4_G | Atom Site Occupancy of C9A is Constrained at     | 0.5    | Check  |
| PLAT300_ALERT_4_G | Atom Site Occupancy of C10A is Constrained at    | 0.5    | Check  |
| PLAT300_ALERT_4_G | Atom Site Occupancy of C11A is Constrained at    | 0.5    | Check  |
| PLAT300_ALERT_4_G | Atom Site Occupancy of C12A is Constrained at    | 0.5    | Check  |
| PLAT300_ALERT_4_G | Atom Site Occupancy of C13A is Constrained at    | 0.5    | Check  |
| PLAT300_ALERT_4_G | Atom Site Occupancy of C14A is Constrained at    | 0.5    | Check  |
| PLAT300_ALERT_4_G | Atom Site Occupancy of C15A is Constrained at    | 0.5    | Check  |
| PLAT300_ALERT_4_G | Atom Site Occupancy of C16A is Constrained at    | 0.5    | Check  |
| PLAT300_ALERT_4_G | Atom Site Occupancy of C17A is Constrained at    | 0.5    | Check  |
| PLAT300_ALERT_4_G | Atom Site Occupancy of C18A is Constrained at    | 0.5    | Check  |
| PLAT300_ALERT_4_G | Atom Site Occupancy of C19A is Constrained at    | 0.5    | Check  |
| PLAT300_ALERT_4_G | Atom Site Occupancy of C20A is Constrained at    | 0.5    | Check  |
| PLAT300_ALERT_4_G | Atom Site Occupancy of C21A is Constrained at    | 0.5    | Check  |
| PLAT300_ALERT_4_G | Atom Site Occupancy of C22A is Constrained at    | 0.5    | Check  |
| PLAT300_ALERT_4_G | Atom Site Occupancy of C23A is Constrained at    | 0.5    | Check  |
| PLAT300_ALERT_4_G | Atom Site Occupancy of H3AA is Constrained at    | 0.5    | Check  |
| PLAT300_ALERT_4_G | Atom Site Occupancy of H4AA is Constrained at    | 0.5    | Check  |
| PLAT300_ALERT_4_G | Atom Site Occupancy of H5AA is Constrained at    | 0.5    | Check  |
| PLAT300_ALERT_4_G | Atom Site Occupancy of H6AA is Constrained at    | 0.5    | Check  |
| PLAT300_ALERT_4_G | Atom Site Occupancy of H9AA is Constrained at    | 0.5    | Check  |
| PLAT300_ALERT_4_G | Atom Site Occupancy of H10B is Constrained at    | 0.5    | Check  |
| PLAT300_ALERT_4_G | Atom Site Occupancy of H11B is Constrained at    | 0.5    | Check  |
| PLAT300_ALERT_4_G | Atom Site Occupancy of H12B is Constrained at    | 0.5    | Check  |

|                   |                                                  |                   |      |        |
|-------------------|--------------------------------------------------|-------------------|------|--------|
| PLAT300_ALERT_4_G | Atom Site Occupancy of H16B                      | is Constrained at | 0.5  | Check  |
| PLAT300_ALERT_4_G | Atom Site Occupancy of H17B                      | is Constrained at | 0.5  | Check  |
| PLAT300_ALERT_4_G | Atom Site Occupancy of H18A                      | is Constrained at | 0.5  | Check  |
| PLAT300_ALERT_4_G | Atom Site Occupancy of H20B                      | is Constrained at | 0.5  | Check  |
| PLAT300_ALERT_4_G | Atom Site Occupancy of H21B                      | is Constrained at | 0.5  | Check  |
| PLAT300_ALERT_4_G | Atom Site Occupancy of H22B                      | is Constrained at | 0.5  | Check  |
| PLAT301_ALERT_3_G | Main Residue Disorder .....(Resd 1)..            |                   | 33   | % Note |
| PLAT333_ALERT_2_G | Check Large Av C6-Ring C-C Dist. C1 -C14         |                   | 1.44 | Ang.   |
| PLAT605_ALERT_4_G | Largest Solvent Accessible VOID in the Structure |                   | 156  | A**3   |

**Author Response:** During the refinement of the structure, electron density peaks were located that were believed to be highly disordered solvent molecules (possibly CHCl<sub>2</sub>/CH<sub>3</sub>CN). Attempts made to model the solvent molecule were not successful. The SQUEEZE option in PLATON (Spek, 2009) indicated there was a large solvent cavity of 156 Å<sup>3</sup>. In the final cycles of refinement, this contribution of 65 electrons to the electron density was removed from the observed data. The density, the F(000) value, the molecular weight and the formula are given without taking into account the results obtained with the SQUEEZE option PLATON (Spek, 2009). Similar treatments of disordered solvent molecules were carried out by Stähler et al. (2001), Cox et al. (2003), Mohamed et al. (2003) and Athimoolam et al. (2005).  
**References:** Spek, A. L. (2009). *Acta Cryst.* D65, 148--155. Athimoolam, S., Kumar, J., Ramakrishnan, V. & Rajaram, R.K. (2005). *Acta Cryst.* E61, m2014-m2017. Cox, J.P., Kumarasammy, Y., Nahar, L., Sarkar D.S. & Shueb, M. (2003). *Acta Cryst.* E59, o975-o977. Mohamed, A.A., Krause Bauer, A.J., Bruce, E.A. & Bruce M.R.M. (2003). *Acta Cryst.* C59, m84-m86. Stähler, R., Nöther, C. & Bensch, W. (2001). *Acta Cryst.* C57, 26-27.

|                   |                                                  |     |       |
|-------------------|--------------------------------------------------|-----|-------|
| PLAT720_ALERT_4_G | Number of Unusual/Non-Standard Labels .....      | 5   | Note  |
| PLAT789_ALERT_4_G | Atoms with Negative _atom_site_disorder_group #  | 41  | Check |
| PLAT811_ALERT_5_G | No ADDSYM Analysis: Too Many Excluded Atoms .... | !   | Info  |
| PLAT860_ALERT_3_G | Number of Least-Squares Restraints .....         | 306 | Note  |
| PLAT869_ALERT_4_G | ALERTS Related to the use of SQUEEZE Suppressed  | !   | Info  |
| PLAT912_ALERT_4_G | Missing # of FCF Reflections Above STh/L= 0.600  | 10  | Note  |
| PLAT978_ALERT_2_G | Number C-C Bonds with Positive Residual Density. | 4   | Note  |

---

0 **ALERT level A** = Most likely a serious problem - resolve or explain  
0 **ALERT level B** = A potentially serious problem, consider carefully  
10 **ALERT level C** = Check. Ensure it is not caused by an omission or oversight  
58 **ALERT level G** = General information/check it is not something unexpected

0 **ALERT type 1** CIF construction/syntax error, inconsistent or missing data  
10 **ALERT type 2** Indicator that the structure model may be wrong or deficient  
8 **ALERT type 3** Indicator that the structure quality may be low  
49 **ALERT type 4** Improvement, methodology, query or suggestion  
1 **ALERT type 5** Informative message, check

---

It is advisable to attempt to resolve as many as possible of the alerts in all categories. Often the minor alerts point to easily fixed oversights, errors and omissions in your CIF or refinement strategy, so attention to these fine details can be worthwhile. In order to resolve some of the more serious problems it may be necessary to carry out additional measurements or structure refinements. However, the purpose of your study may justify the reported deviations and the more serious of these should normally be commented upon in the discussion or experimental section of a paper or in the "special\_details" fields of the CIF. checkCIF was carefully designed to identify outliers and unusual parameters, but every test has its limitations and alerts that are not important in a particular case may appear. Conversely, the absence of alerts does not guarantee there are no aspects of the results needing attention. It is up to the individual to critically assess their own results and, if necessary, seek expert advice.

### **Publication of your CIF in IUCr journals**

A basic structural check has been run on your CIF. These basic checks will be run on all CIFs submitted for publication in IUCr journals (*Acta Crystallographica*, *Journal of Applied Crystallography*, *Journal of Synchrotron Radiation*); however, if you intend to submit to *Acta Crystallographica Section C* or *E* or *IUCrData*, you should make sure that full publication checks are run on the final version of your CIF prior to submission.

### **Publication of your CIF in other journals**

Please refer to the *Notes for Authors* of the relevant journal for any special instructions relating to CIF submission.

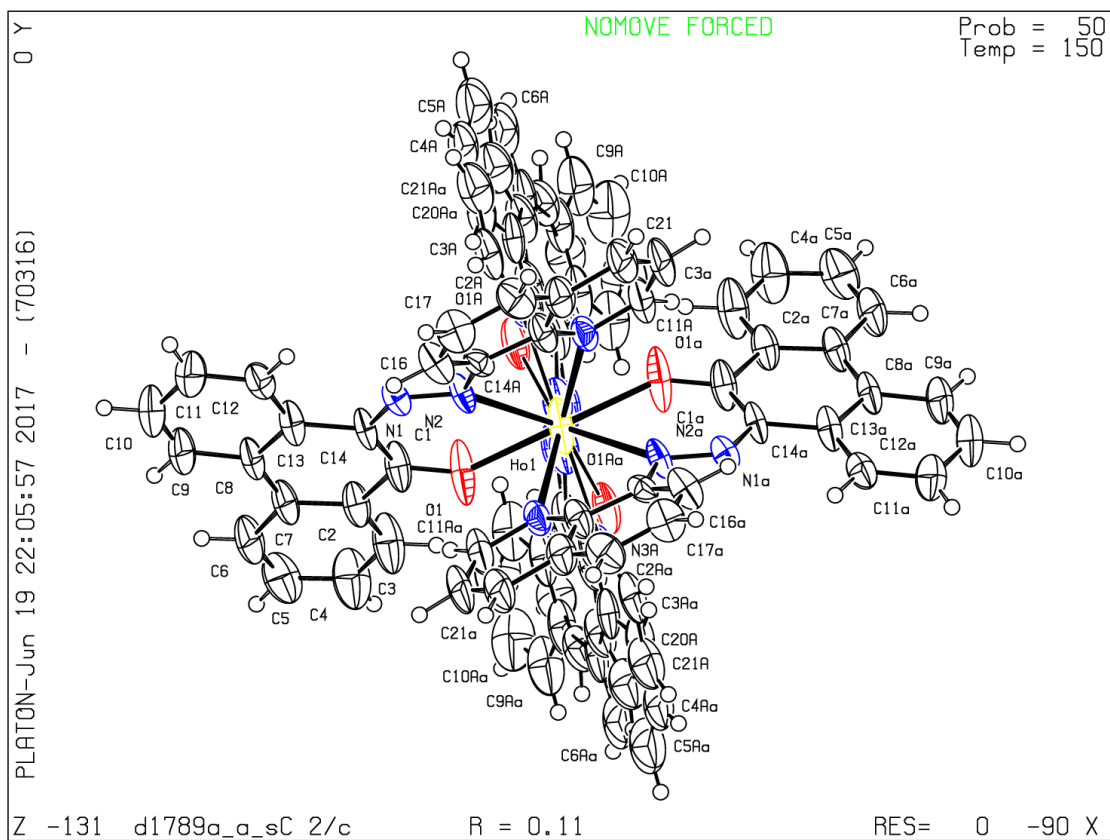

Supplement: s1 [file s1]
