# Supplementary material
Source: MDPI journal article supplement (https://www.mdpi.com/2304-6740/6/2/56)
Supplement: s1 [file s1]

Supporting Information for:

# Homoleptic lanthanide complexes containing a redox-active ligand and the investigation of their electronic and photophysical properties

Robin A. Taylor <sup>1,2</sup>, Nico M. Bonanno <sup>2</sup>, Mihaela Cibian <sup>3</sup>, Jeetkia Yadav <sup>3</sup>, Harlyn J. Silverstein <sup>1</sup>, Christopher R. Wiebe <sup>1,4,5</sup>, Cole Mauws <sup>1</sup>, Alan J. Lough <sup>6</sup> and Martin T. Lemaire <sup>1,2,7,\*</sup>

<sup>1</sup> Department of Chemistry, University of Manitoba, Winnipeg, MB R3T 2N2, Canada; harlyn.silverstein@gmail.com; rob2235@hotmail.com (R.A.T.); chris.r.wiebe@gmail.com (C.R.W.); colemws@gmail.com (C.M.)

<sup>2</sup> Current address: Department of Chemistry, Brock University, St. Catharines, ON L2S 3A1, Canada; nb15sz@brocku.ca

<sup>3</sup> Department of Chemistry, Université de Montreal, Montreal, QC H3C 3J7, Canada; cibian.mihaela@gmail.com (M.C.); jeetika.yadav@gmail.com (J.Y.)

<sup>4</sup> Department of Chemistry, University of Winnipeg, Winnipeg, MB R3B 2G3, Canada;

<sup>5</sup> Canadian Institute for Advanced Research, Quantum Materials, MaRS Centre, West Tower, 661 University Ave., Suite 505, Toronto, ON M5G 1M1, Canada

<sup>6</sup> Department of Chemistry, University of Toronto, 80 St. George Street, Toronto, ON M5S 3H6, Canada; alough@chem.utoronto.ca

<sup>7</sup> Department of Chemistry, Brandon University, Brandon, MB R7A 6A9, Canada

\* Correspondence: mlemaire@brocku.ca; Tel.: +01-905-688-5550

### **X-ray crystallography:**

From complex **4** data were collected on a Bruker Kappa APEX-DUO diffractometer using monochromated Mo-K $\alpha$  radiation and were measured using a combination of  $\phi$  scans and  $\omega$  scans. The data were processed using APEX2 and SAINT (Bruker, 2007). Absorption corrections were carried out using SADABS (Bruker, 2007). The structure was solved using SHELXT (Sheldrick, 2015a) and refined using SHELXL (Sheldrick, 2015b) for full-matrix least-squares refinement that was based on  $F^2$ . All H atoms were included in calculated positions and allowed to refine in riding-motion approximation with U<sub>iso</sub> tied to the carrier atom. During the refinement of the structure, electron density peaks were located that were believed to be highly disordered solvent molecules (possibly CHCl<sub>3</sub>/CH<sub>3</sub>CN based on the crystallization solvents). Attempts made to model the solvent molecule were not successful. The SQUEEZE (Spek, 2015) option in PLATON (Spek, 2009) indicated there was a large solvent cavity of 156 Å<sup>3</sup>. In the final cycles of refinement, this contribution of 65 electrons to the electron density was removed from the observed data. The density, the  $F(000)$  value, the molecular weight and the formula are given without taking into account the results obtained with the SQUEEZE (Spek, 2015) option in PLATON (Spek, 2009).

### **References**

Bruker (2007). APEX2, SAINT & SADABS Bruker AXS Inc., Madison, Wisconsin, USA.

Sheldrick, G. M. (2015a). Acta Cryst. A71, 3–8.

Sheldrick, G. M. (2015b). Acta Cryst. C71, 3–8.

Spek, A. L. (2009). Acta Cryst. D65, 148–155.

Spek, A. L. (2015). Acta Cryst. C71, 9–18.

## *Brock MS Facility - Bruker HCT Ultra - LCMS*

### Analysis Info

Analysis Name D:\Data\16Feb\MLH0137.d  
Method QL 160105.m  
Sample Name ~~MLH0137.d~~  
Comment

Acquisition Date 10/02/2016 8:11:17 PM

Operator LIQUN QIU  
Instrument HCTultra

### Acquisition Parameters

|                   |               |              |           |                          |          |
|-------------------|---------------|--------------|-----------|--------------------------|----------|
| Ion Source Type   | ESI           | Ion Polarity | Positive  | Alternating Ion Polarity | off      |
| Mass Range Mode   | Std/Enhanced  | Scan Begin   | 200 m/z   | Scan End                 | 1400 m/z |
| Capillary Exit    | 106.9 Volt    | Skimmer      | 40.0 Volt | Trap Drive               | 83.7     |
| Accumulation Time | 26280 $\mu$ s | Averages     | 5 Spectra | Auto MS/MS               | off      |

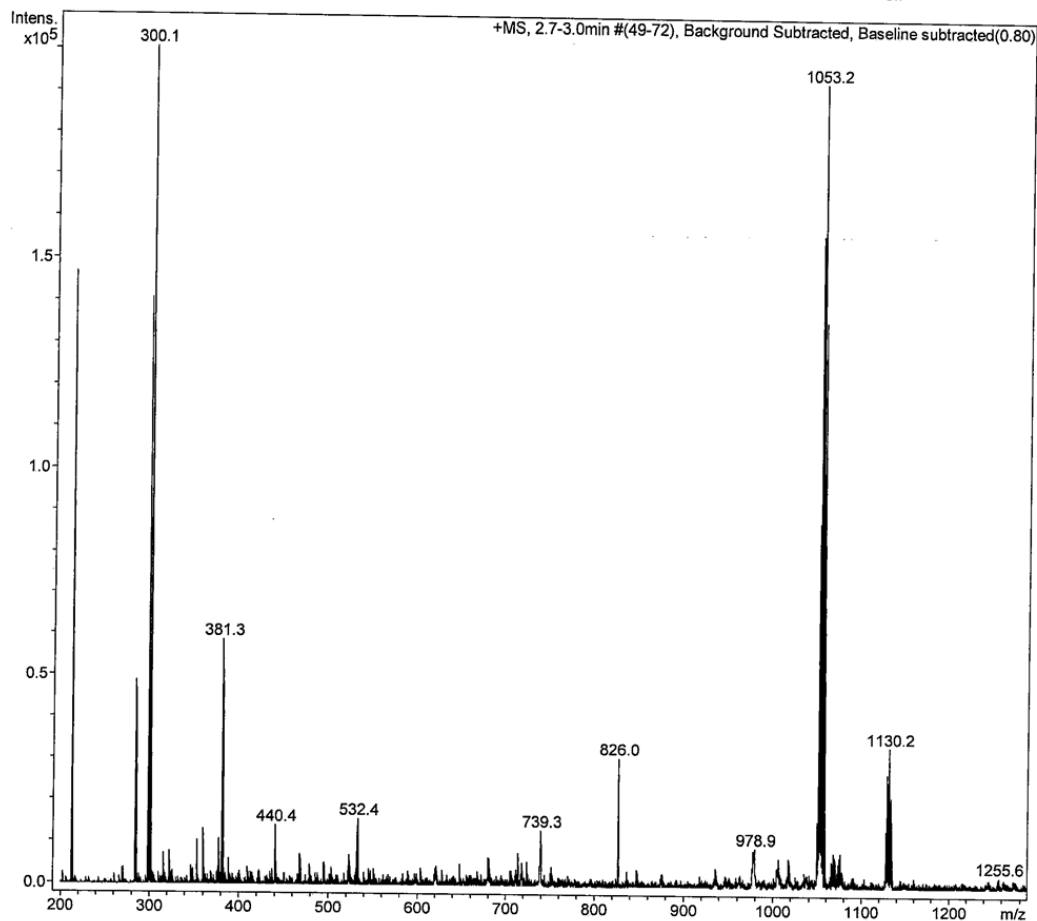

**Figure S1.** ESI mass spectrum (positive ion mode) of **1**.

## Brock MS Facility - Bruker HCT Ultra - LCMS

### Analysis Info

Analysis Name D:\Data\16Feb\MLH0137.d  
 Method QL 160105.m  
 Sample Name RT-1-123  
 Comment

Acquisition Date 10/02/2016 8:11:17 PM

Operator LIQUN QIU  
 Instrument HCTultra

### Acquisition Parameters

Ion Source Type ESI  
 Mass Range Mode Std/Enhanced  
 Capillary Exit 106.9 Volt  
 Accumulation Time 26280  $\mu$ s

Ion Polarity Positive  
 Scan Begin 200 m/z  
 Skimmer 40.0 Volt  
 Averages 5 Spectra

Alternating Ion Polarity off  
 Scan End 1400 m/z  
 Trap Drive 83.7  
 Auto MS/MS off

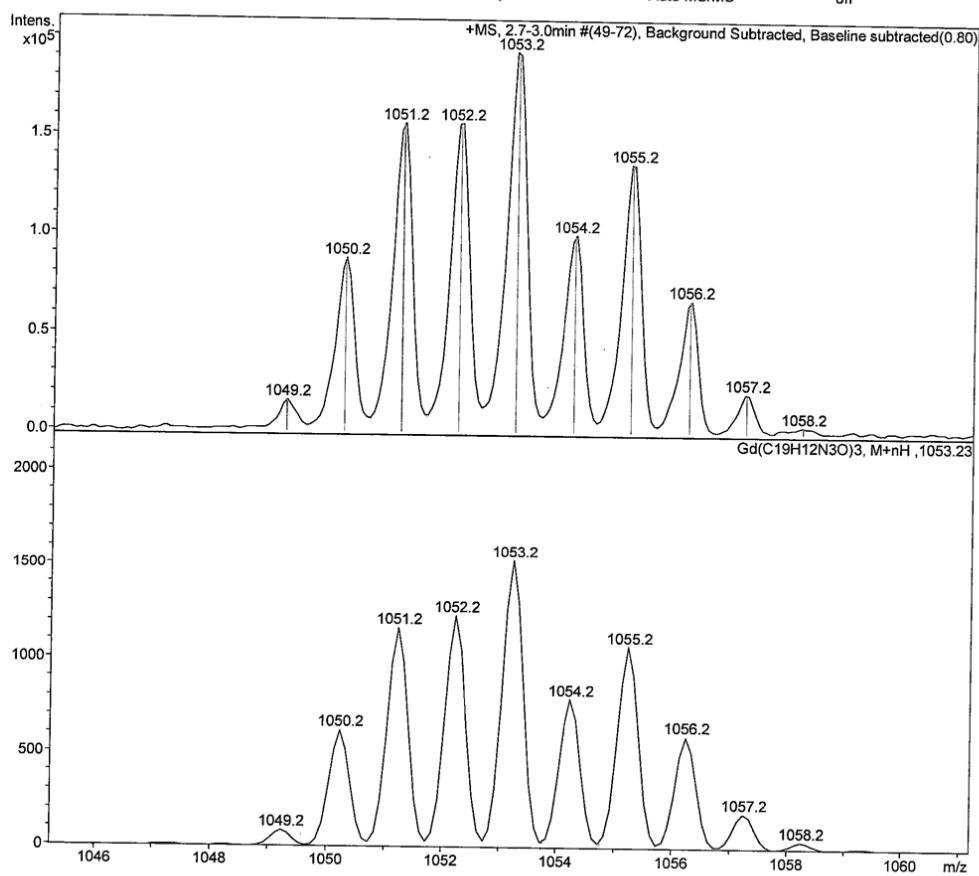

**Figure S2.** Experimental (top) and theoretical (bottom) isotopic distribution for  $[M+H]^+$  peak for

1.

## ***Brock MS Facility - Bruker HCT Ultra - LCMS***

### **Analysis Info**

Analysis Name D:\Data\16Feb\MLH0135C.d  
Method QL 160105.m  
Sample Name ~~RT 2.145~~  
Comment

Acquisition Date 10/02/2016 7:07:58 PM

Operator LIQUN QIU  
Instrument HCTultra

### **Acquisition Parameters**

|                   |               |              |           |                          |          |
|-------------------|---------------|--------------|-----------|--------------------------|----------|
| Ion Source Type   | ESI           | Ion Polarity | Positive  | Alternating Ion Polarity | off      |
| Mass Range Mode   | Std/Enhanced  | Scan Begin   | 500 m/z   | Scan End                 | 1400 m/z |
| Capillary Exit    | 136.0 Volt    | Skimmer      | 40.0 Volt | Trap Drive               | 209.8    |
| Accumulation Time | 43696 $\mu$ s | Averages     | 5 Spectra | Auto MS/MS               | off      |

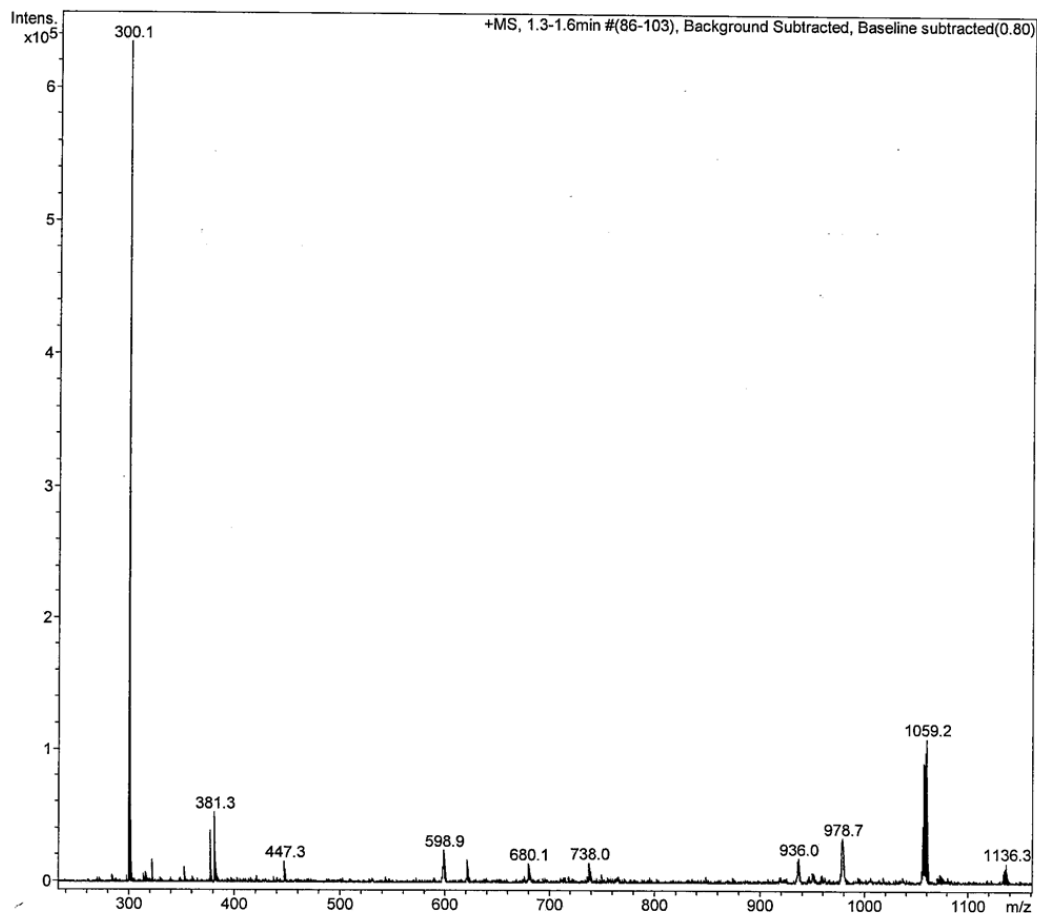

**Figure S3.** ESI mass spectrum (positive ion mode) of **2**.

## Brock MS Facility - Bruker HCT Ultra - LCMS

|                      |                          |                                        |           |
|----------------------|--------------------------|----------------------------------------|-----------|
| <b>Analysis Info</b> |                          | Acquisition Date 10/02/2016 7:07:58 PM |           |
| Analysis Name        | D:\Data\16Feb\MLH0135C.d | Operator                               | LIQUN QIU |
| Method               | QL 160105.m              | Instrument                             | HCTultra  |
| Sample Name          | <del>160105.m</del>      |                                        |           |
| Comment              |                          |                                        |           |

### Acquisition Parameters

|                   |               |              |           |                          |          |
|-------------------|---------------|--------------|-----------|--------------------------|----------|
| Ion Source Type   | ESI           | Ion Polarity | Positive  | Alternating Ion Polarity | off      |
| Mass Range Mode   | Std/Enhanced  | Scan Begin   | 500 m/z   | Scan End                 | 1400 m/z |
| Capillary Exit    | 136.0 Volt    | Skimmer      | 40.0 Volt | Trap Drive               | 209.8    |
| Accumulation Time | 43696 $\mu$ s | Averages     | 5 Spectra | Auto MS/MS               | off      |

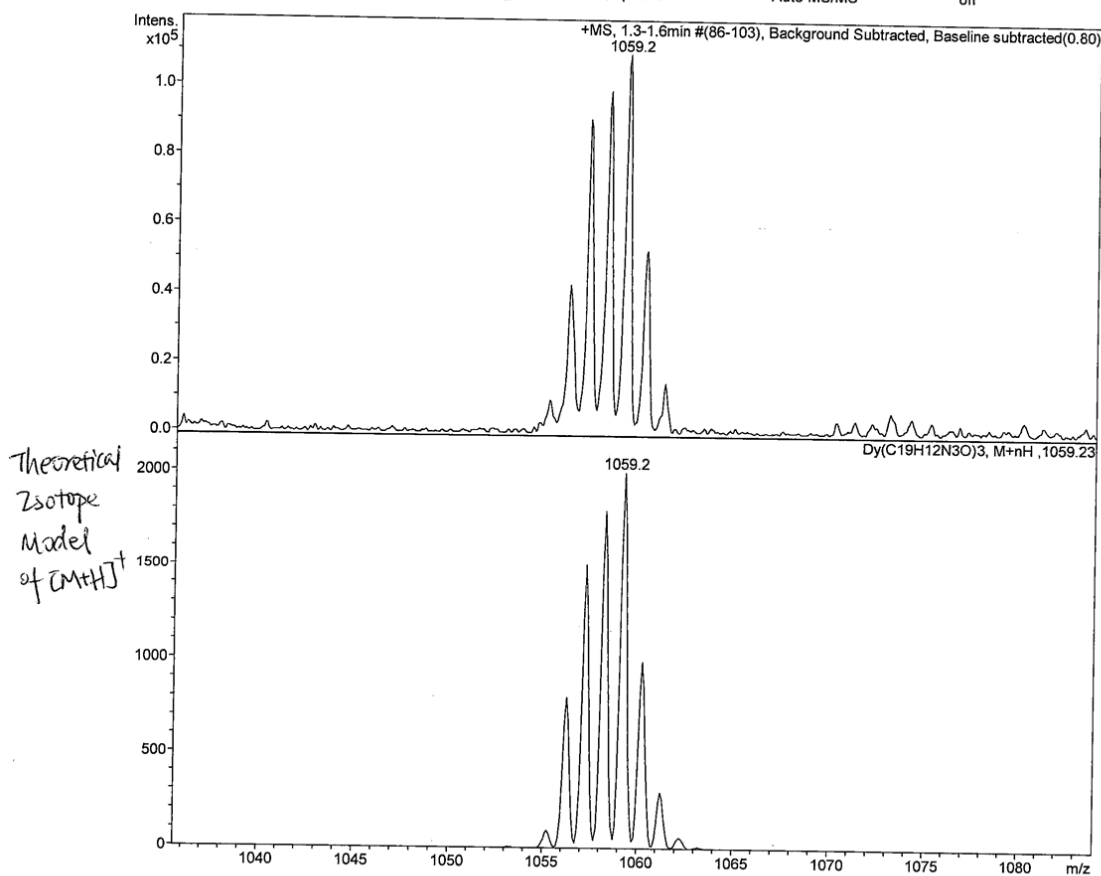

**Figure S4.** Experimental (top) and theoretical (bottom) isotopic distribution for  $[\text{M}+\text{H}]^+$  peak for

## ***Brock MS Facility - Bruker HCT Ultra - LCMS***

### **Analysis Info**

Analysis Name D:\Data\16Feb\MLH0136.d  
Method QL 160105.m  
Sample Name ~~RT 2.47~~  
Comment

Acquisition Date 10/02/2016 7:53:20 PM

Operator LIQUN QIU  
Instrument HCTultra

### **Acquisition Parameters**

|                   |              |              |           |                          |          |
|-------------------|--------------|--------------|-----------|--------------------------|----------|
| Ion Source Type   | ESI          | Ion Polarity | Positive  | Alternating Ion Polarity | off      |
| Mass Range Mode   | Std/Enhanced | Scan Begin   | 200 m/z   | Scan End                 | 1400 m/z |
| Capillary Exit    | 106.9 Volt   | Skimmer      | 40.0 Volt | Trap Drive               | 83.7     |
| Accumulation Time | 2180 $\mu$ s | Averages     | 5 Spectra | Auto MS/MS               | off      |

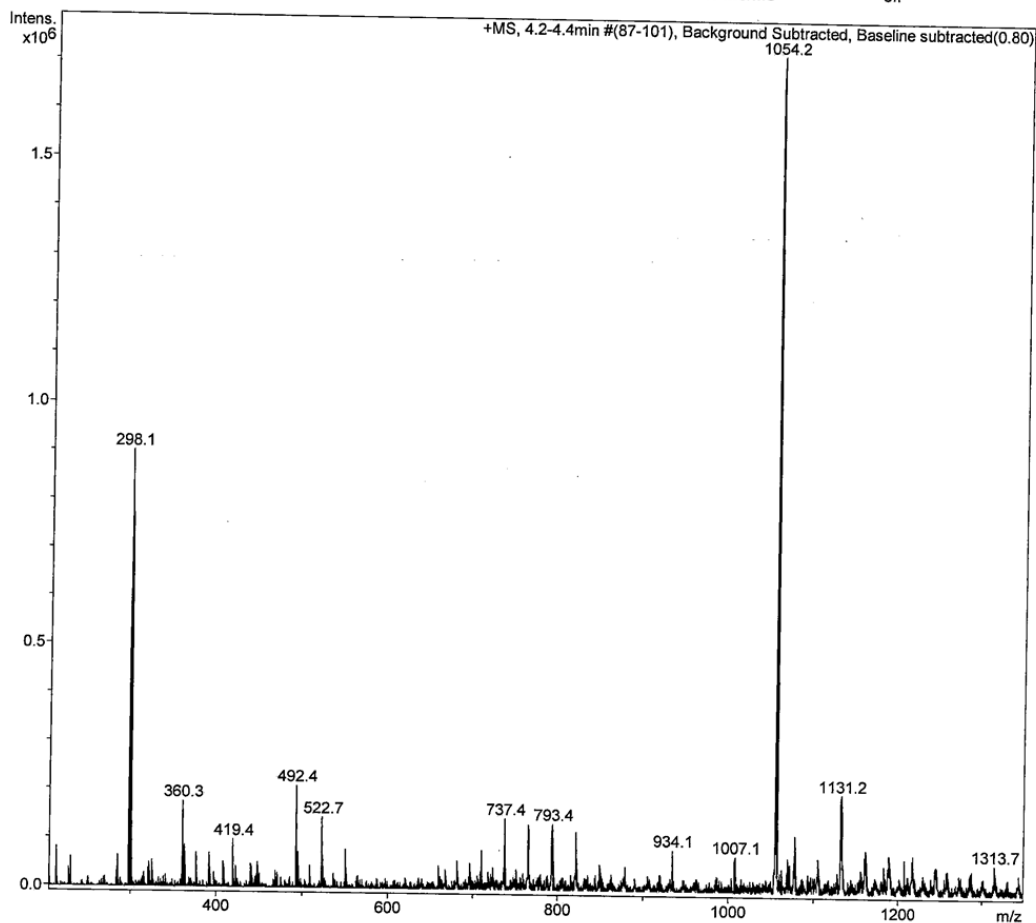

**Figure S5.** ESI mass spectrum (positive ion mode) of **3**.

## Brock MS Facility - Bruker HCT Ultra - LCMS

### Analysis Info

Analysis Name D:\Data\16Feb\MLH0136.d  
 Method QL 160105.m  
 Sample Name ~~160105.m~~  
 Comment

Acquisition Date 10/02/2016 7:53:20 PM

Operator LIQUN QIU  
 Instrument HCTultra

### Acquisition Parameters

|                   |              |              |           |                          |          |
|-------------------|--------------|--------------|-----------|--------------------------|----------|
| Ion Source Type   | ESI          | Ion Polarity | Positive  | Alternating Ion Polarity | off      |
| Mass Range Mode   | Std/Enhanced | Scan Begin   | 200 m/z   | Scan End                 | 1400 m/z |
| Capillary Exit    | 106.9 Volt   | Skimmer      | 40.0 Volt | Trap Drive               | 83.7     |
| Accumulation Time | 2180 $\mu$ s | Averages     | 5 Spectra | Auto MS/MS               | off      |

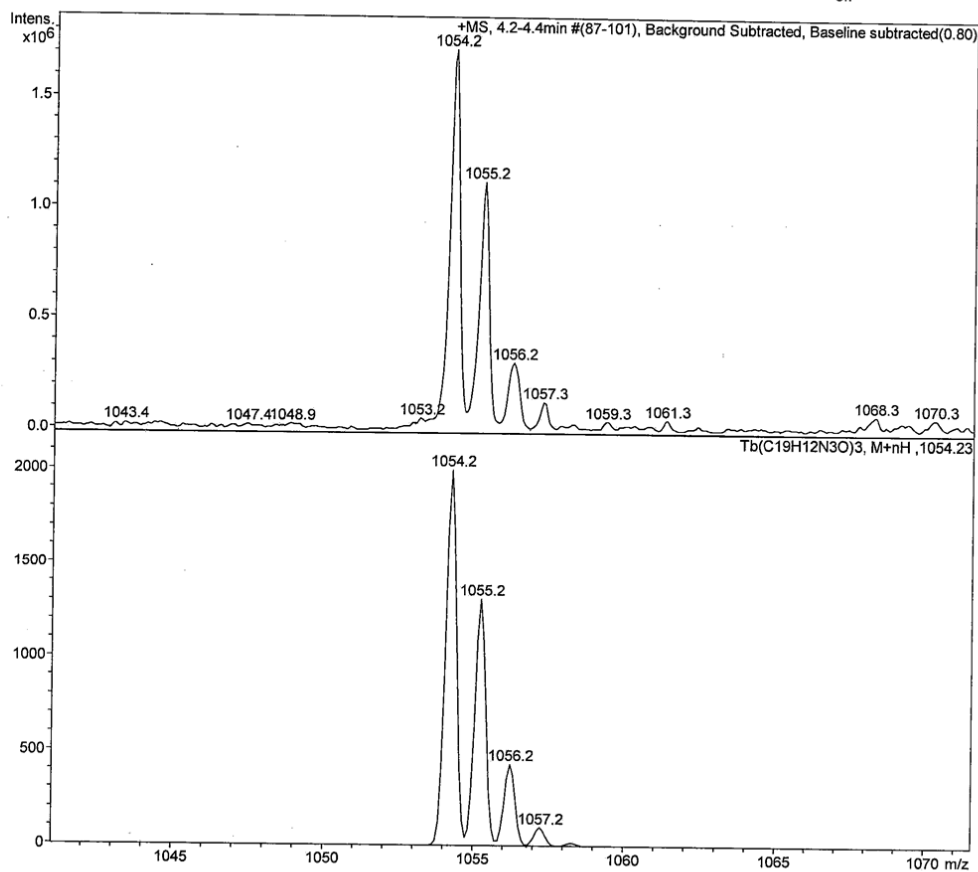

**Figure S6.** Experimental (top) and theoretical (bottom) isotopic distribution for  $[M+H]^+$  peak for

3.



**Table S1.** Crystal data and structure refinement for **4**.

|                                   |                                                                  |                             |
|-----------------------------------|------------------------------------------------------------------|-----------------------------|
| Empirical formula                 | C <sub>69</sub> H <sub>42</sub> Ho N <sub>9</sub> O <sub>3</sub> |                             |
| Formula weight                    | 1210.04                                                          |                             |
| Temperature                       | 150(2) K                                                         |                             |
| Wavelength                        | 0.71073 Å                                                        |                             |
| Crystal system                    | Monoclinic                                                       |                             |
| Space group                       | C2/c                                                             |                             |
| Unit cell dimensions              | $a = 17.0922(15)$ Å                                              | $\alpha = 90^\circ$ .       |
|                                   | $b = 22.4119(17)$ Å                                              | $\beta = 92.427(3)^\circ$ . |
|                                   | $c = 15.7288(14)$ Å                                              | $\gamma = 90^\circ$ .       |
| Volume                            | 6019.8(9) Å <sup>3</sup>                                         |                             |
| Z                                 | 4                                                                |                             |
| Density (calculated)              | 1.335 Mg/m <sup>3</sup>                                          |                             |
| Absorption coefficient            | 1.368 mm <sup>-1</sup>                                           |                             |
| F(000)                            | 2440                                                             |                             |
| Crystal size                      | 0.220 x 0.120 x 0.100 mm <sup>3</sup>                            |                             |
| Theta range for data collection   | 1.499 to 27.549°.                                                |                             |
| Index ranges                      | -22 ≤ h ≤ 17, -29 ≤ k ≤ 29, -20 ≤ l ≤ 20                         |                             |
| Reflections collected             | 55440                                                            |                             |
| Independent reflections           | 6963 [R(int) = 0.0859]                                           |                             |
| Completeness to theta = 25.242°   | 100.0 %                                                          |                             |
| Absorption correction             | Semi-empirical from equivalents                                  |                             |
| Max. and min. transmission        | 0.7456 and 0.6314                                                |                             |
| Refinement method                 | Full-matrix least-squares on F <sup>2</sup>                      |                             |
| Data / restraints / parameters    | 6963 / 306 / 492                                                 |                             |
| Goodness-of-fit on F <sup>2</sup> | 1.370                                                            |                             |
| Final R indices [I > 2σ(I)]       | R1 = 0.1087, wR2 = 0.2078                                        |                             |
| R indices (all data)              | R1 = 0.1398, wR2 = 0.2178                                        |                             |
| Extinction coefficient            | n/a                                                              |                             |
| Largest diff. peak and hole       | 0.828 and -1.366 e.Å <sup>-3</sup>                               |                             |

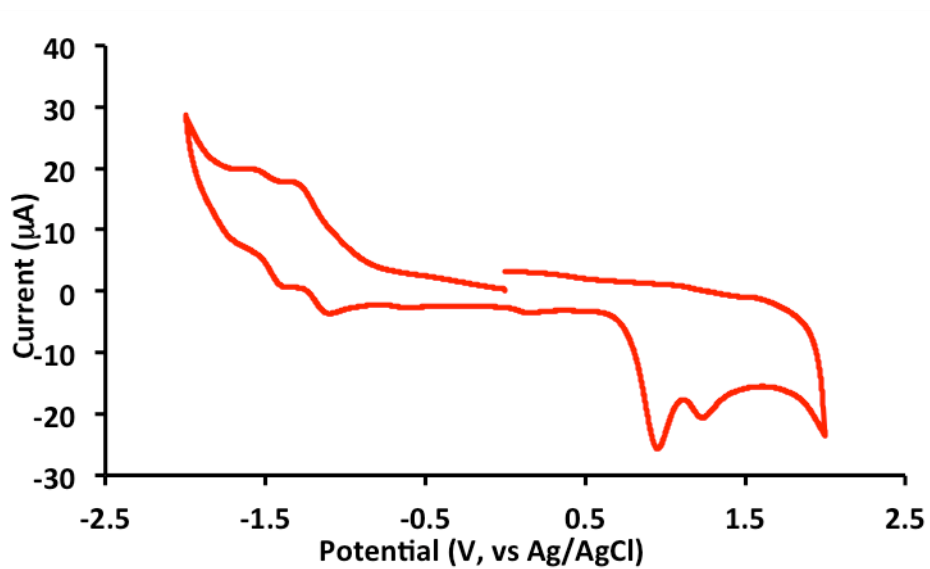

**Figure S7.** Cyclic voltammogram of **2** in  $\text{CH}_2\text{Cl}_2$ .

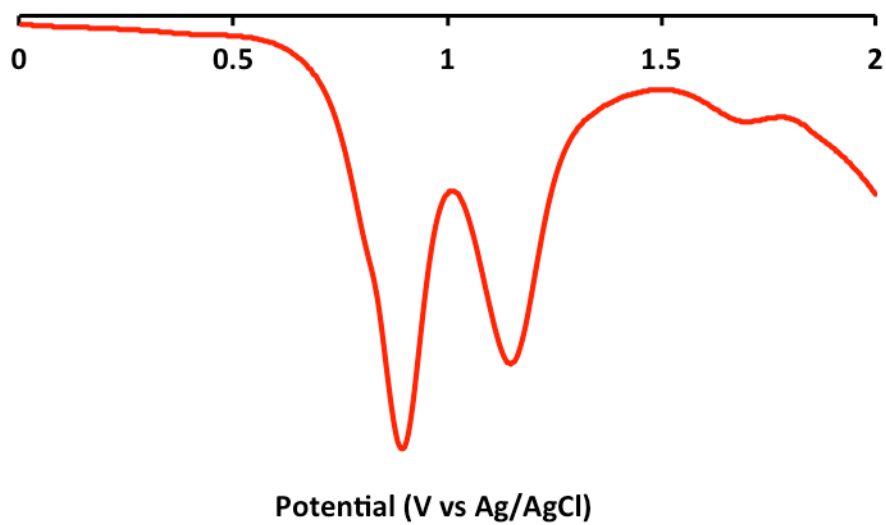

**Figure S8.** DPV (anodic) of **2** in  $\text{CH}_2\text{Cl}_2$ .

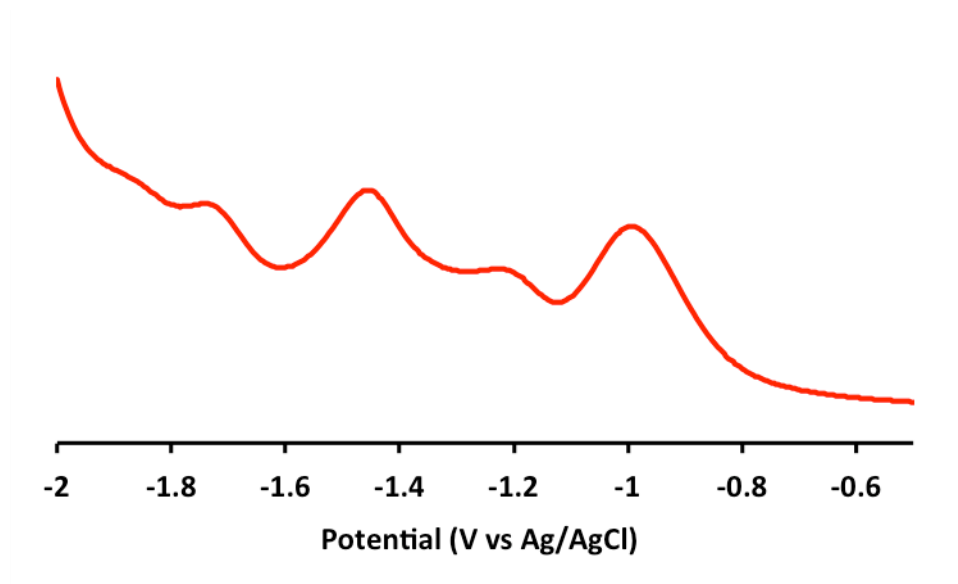

**Figure S9.** DPV (cathodic) of **2** in  $\text{CH}_2\text{Cl}_2$ .

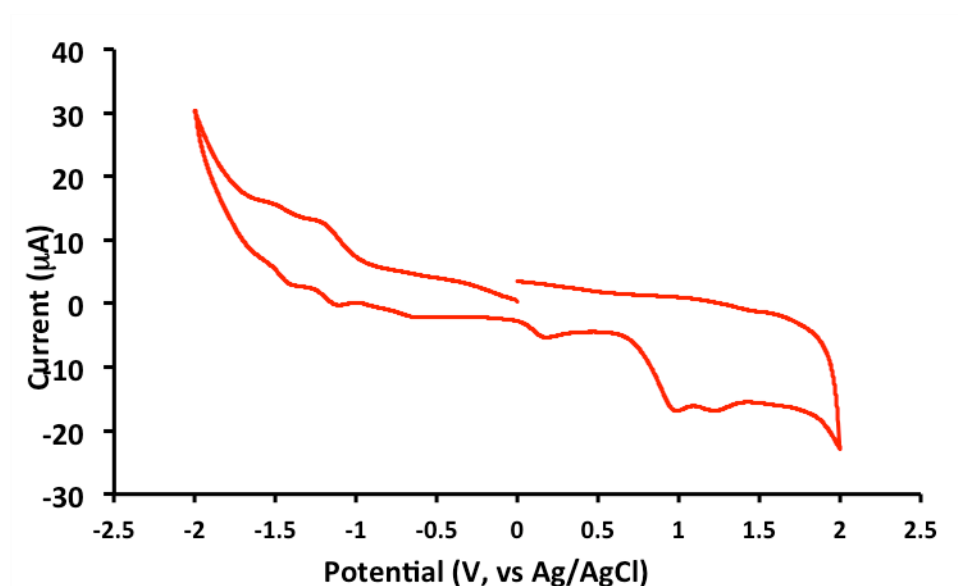

**Figure S10.** Cyclic voltammogram of **3** in  $\text{CH}_2\text{Cl}_2$ .

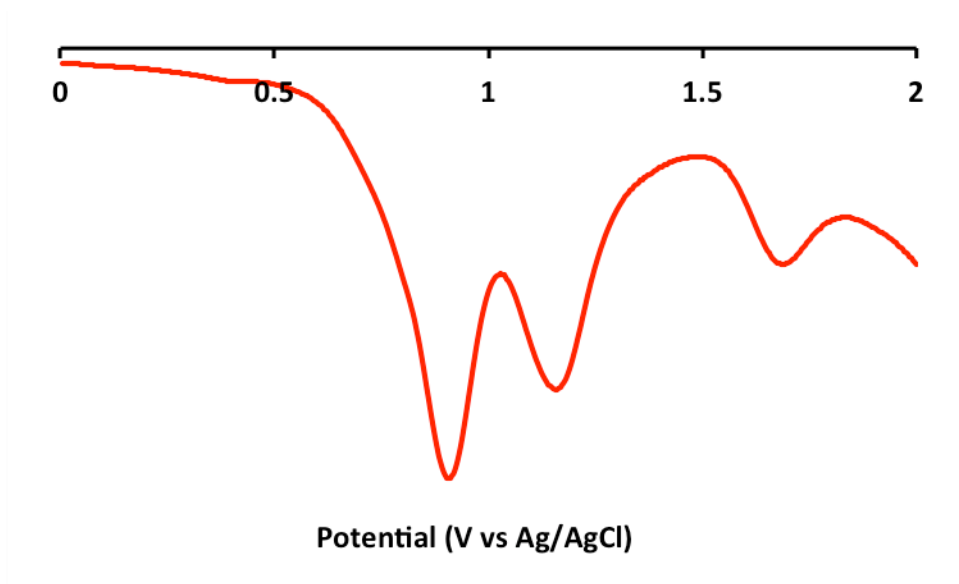

**Figure S11.** DPV (anodic) of **3** in  $\text{CH}_2\text{Cl}_2$ .

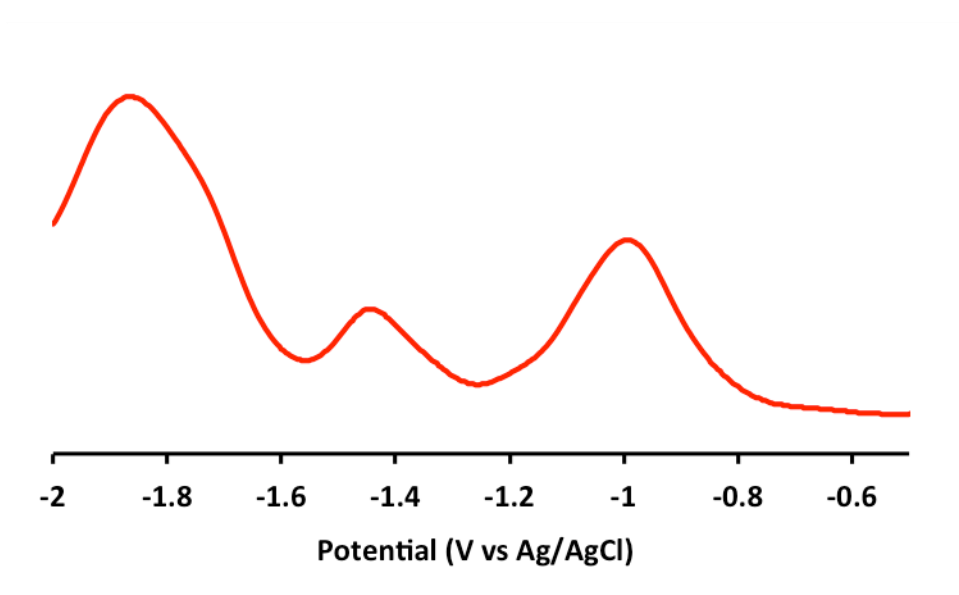

**Figure S12.** DPV (cathodic) of **3** in  $\text{CH}_2\text{Cl}_2$ .

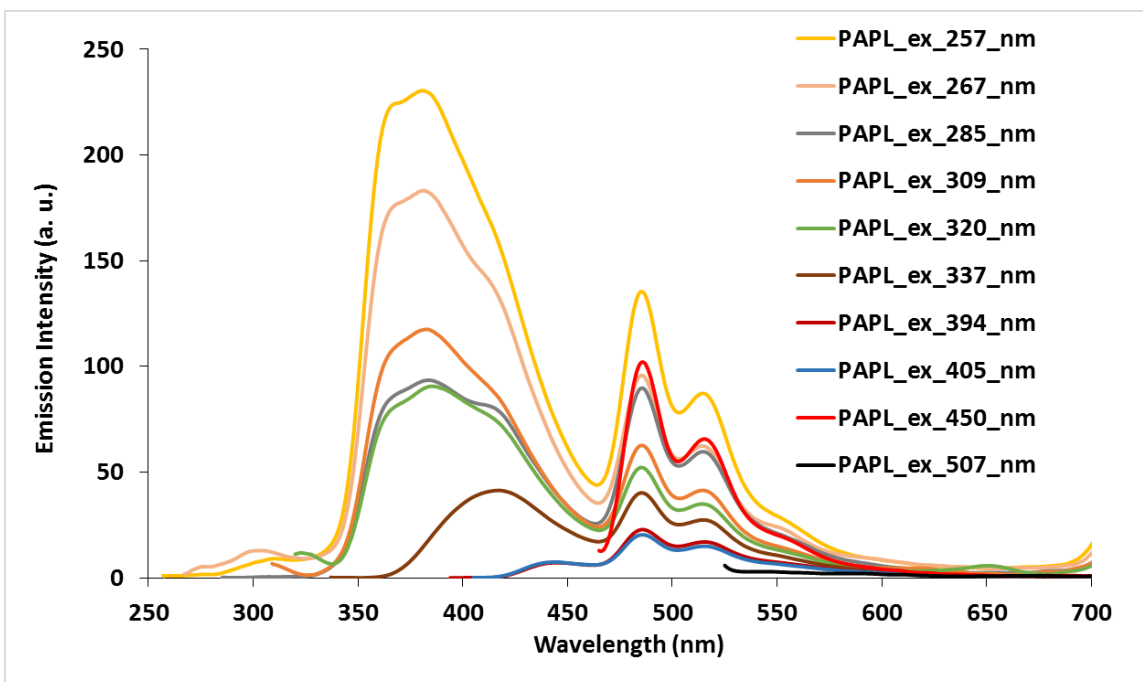

**Figure S13.** Emission profile of **papl** at different  $\lambda_{\text{exc}}$  (257 to 507 nm) in DCM at room temperature.

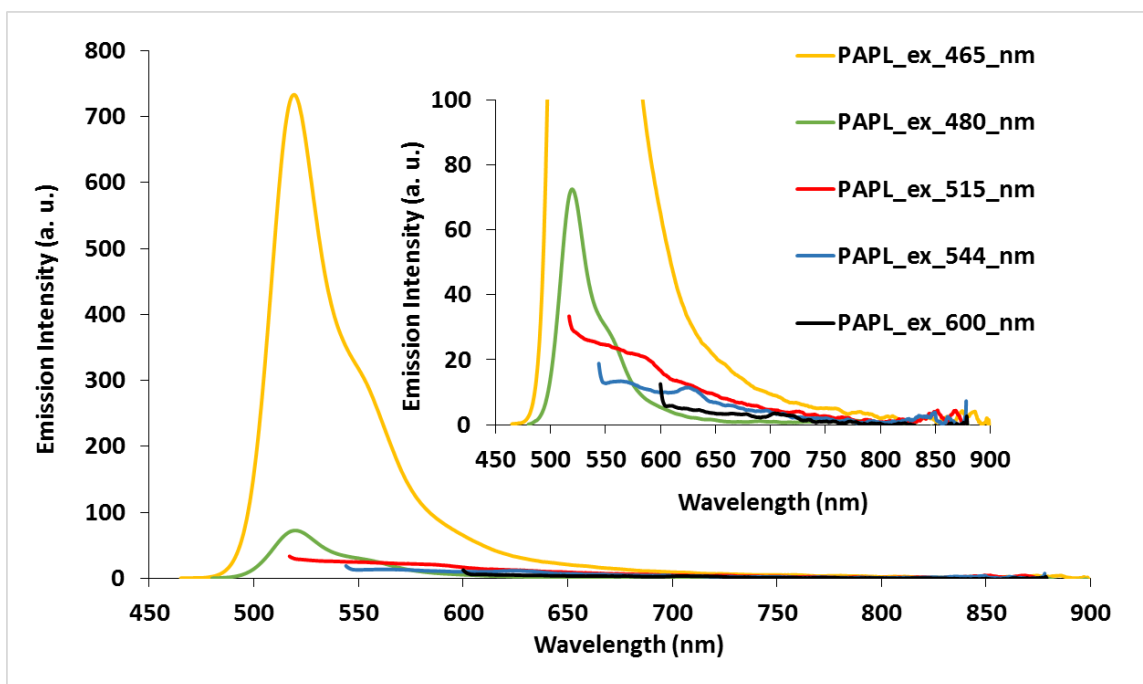

**Figure S14.** Emission profile of **papl** at different  $\lambda_{\text{exc}}$  (465 to 600 nm) in DCM at room temperature.

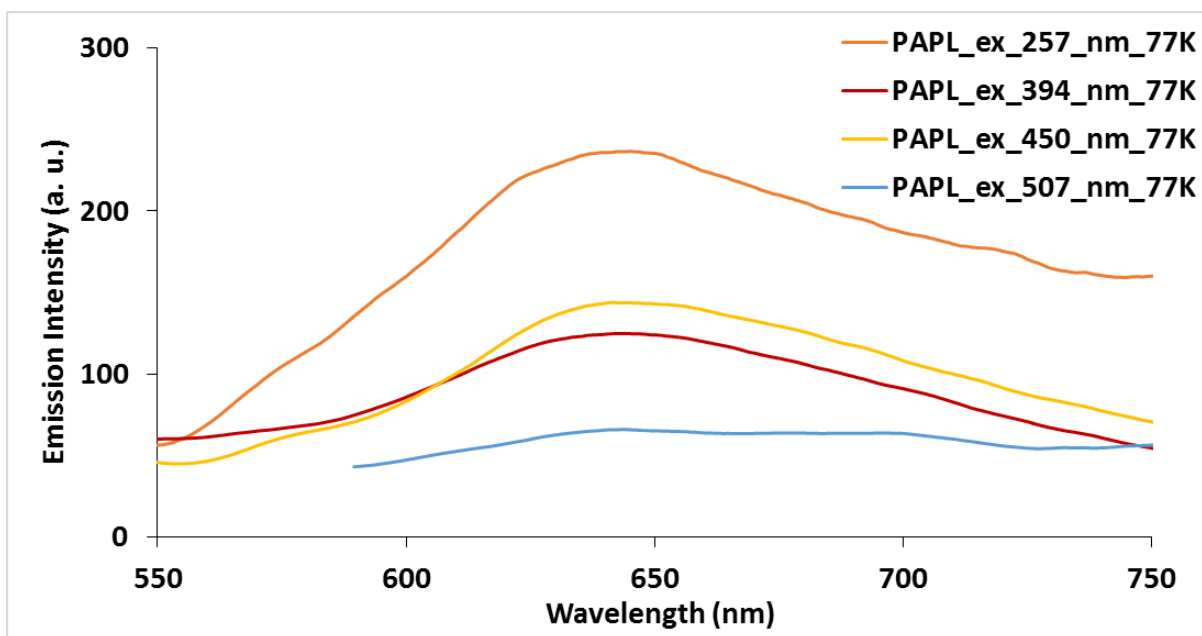

**Figure S15.** Emission profile of **papl** at different  $\lambda_{\text{exc}}$  (257 to 507 nm) in DCM at 77 K;  $\lambda_{\text{max em}} = 645$  nm.

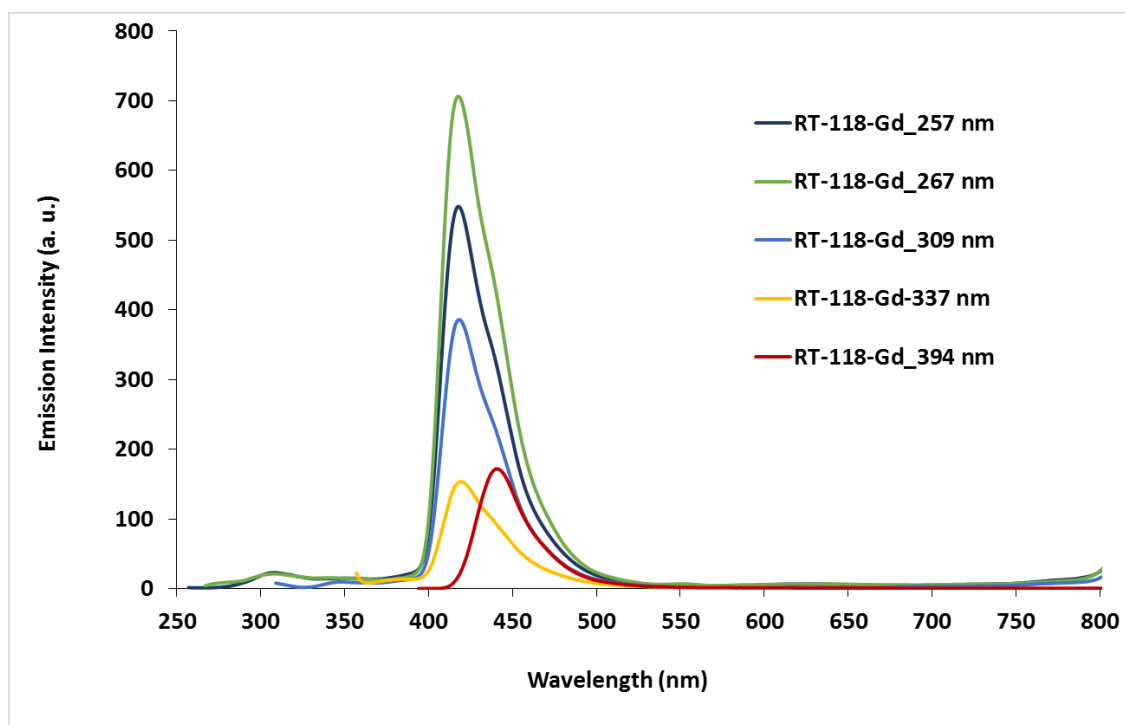

**Figure S16.** Emission profile of **1** at different  $\lambda_{\text{exc}}$  in DCM at room temperature;  $\lambda_{\text{max em}} = 419$  nm. No emission was observed when  $\lambda_{\text{exc}} = 517$ ,  $\lambda_{\text{exc}} = 544$ , and  $\lambda_{\text{exc}} = 600$ .

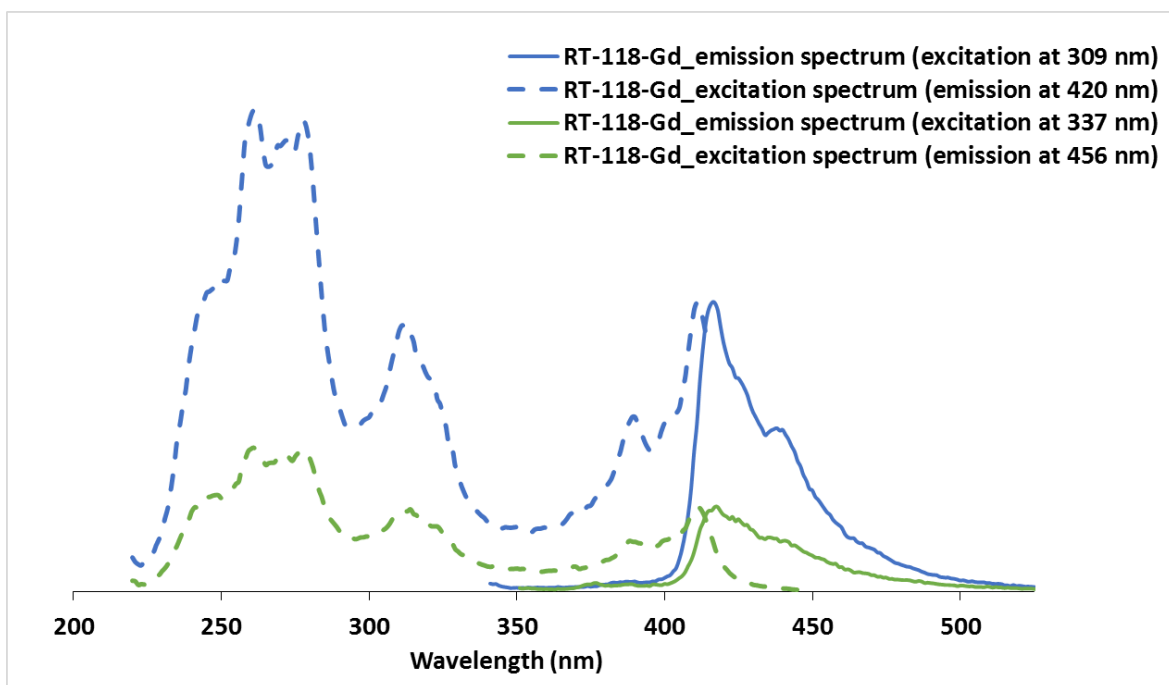

**Figure S17.** Emission and excitation profiles of **1** in DCM at room temperature.

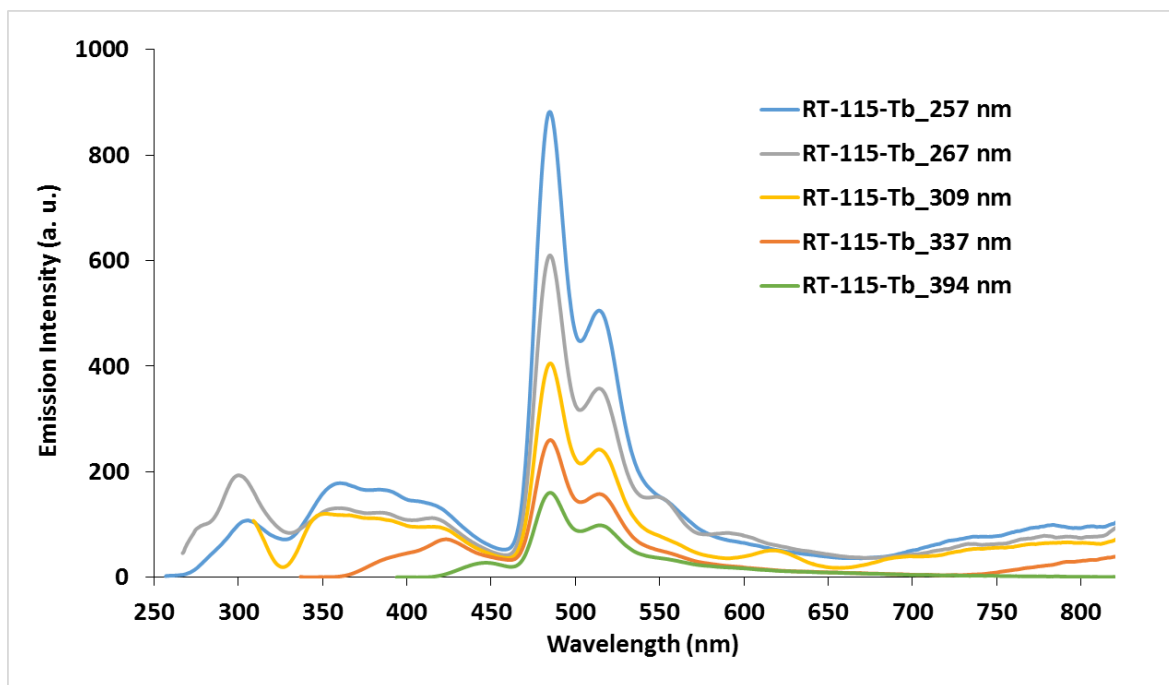

**Figure S18.** Emission profile of **3** at different  $\lambda_{\text{exc}}$  in DCM at room temperature;  $\lambda_{\text{max em}}$  (nm): 419, 485, 515. No emission was observed when  $\lambda_{\text{exc}} = 517$ ,  $\lambda_{\text{exc}} = 544$ , and  $\lambda_{\text{exc}} = 600$ .

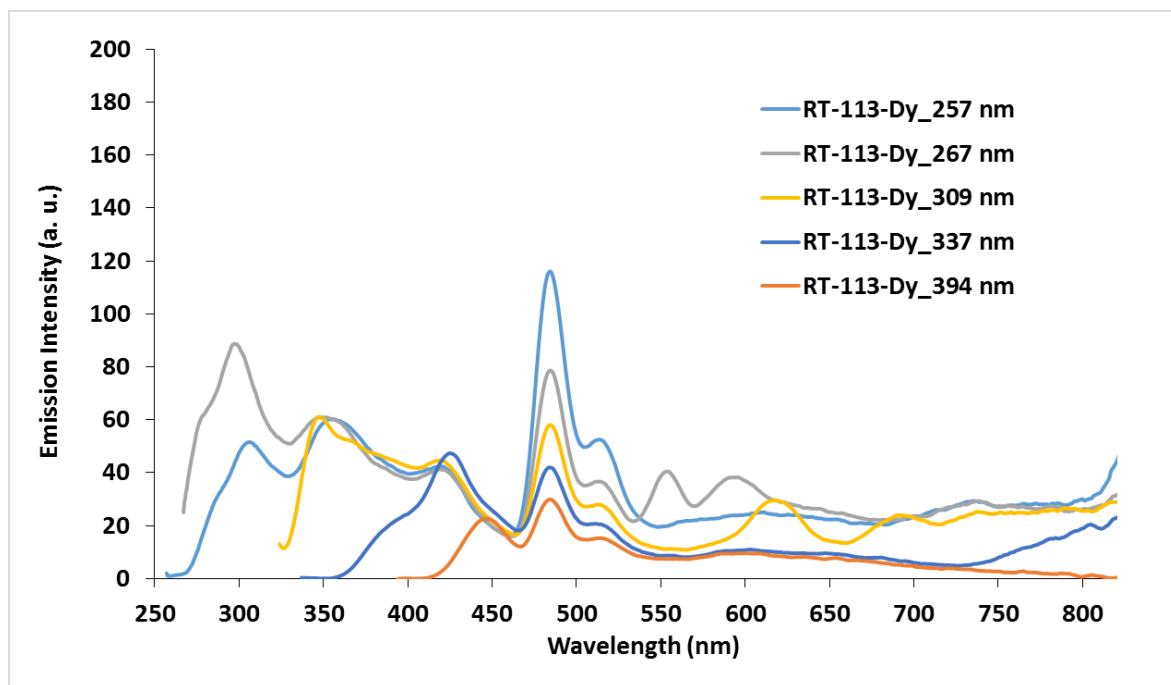

**Figure S19.** Emission profile of **2** at different  $\lambda_{\text{exc}}$  in DCM at room temperature;  $\lambda_{\text{max em}}$  (nm): 419, 485, 515. Because of the very weak emission of the compound, emission of the solvent is observed – see the comparative figures below (Figures S21-S24). No emission was observed when  $\lambda_{\text{exc}} = 517$ ,  $\lambda_{\text{exc}} = 544$ , and  $\lambda_{\text{exc}} = 600$ .

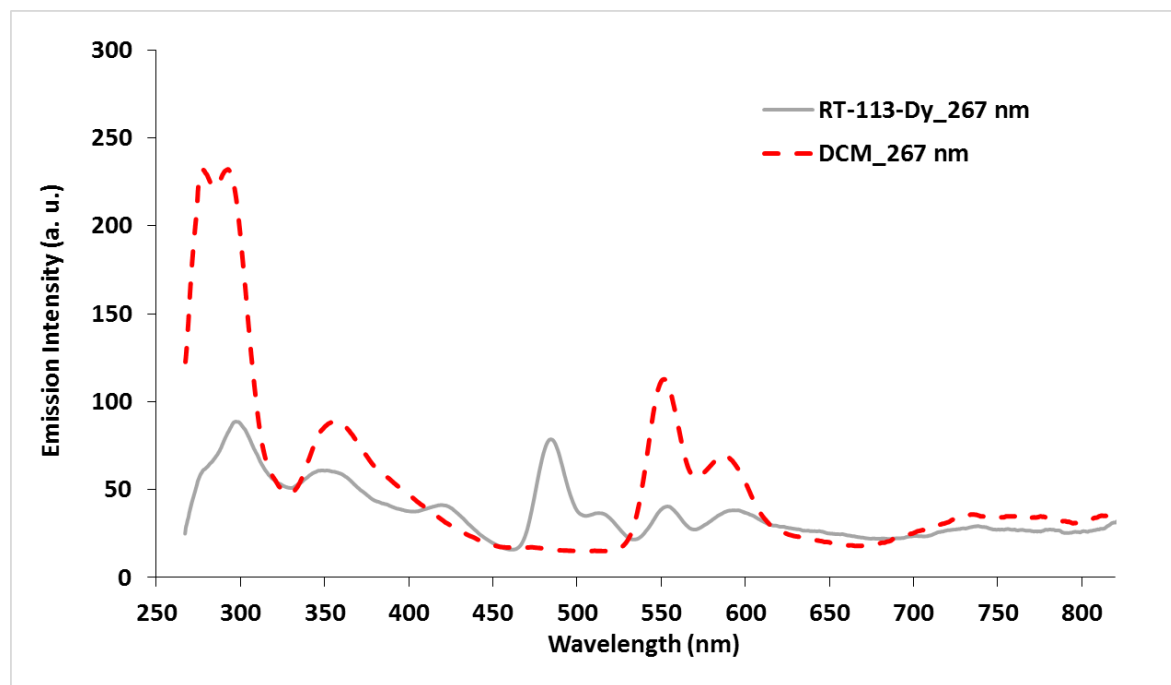

**Figure S20.** Emission profiles of **2** in DCM (grey line) and the solvent DCM (dashed red line) at room temperature;  $\lambda_{\text{exc}} = 267$  nm.



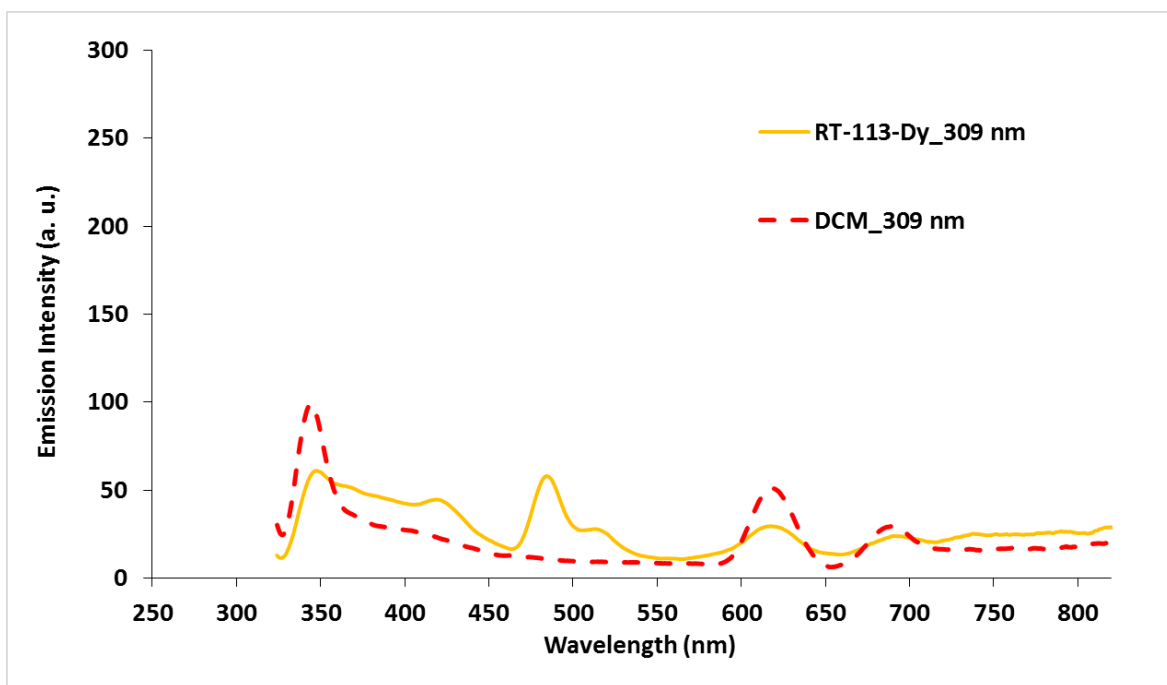

**Figure S21.** Emission profiles of **2** in DCM (yellow line) and the solvent DCM (red dashed line) at room temperature;  $\lambda_{\text{exc}} = 309$  nm.

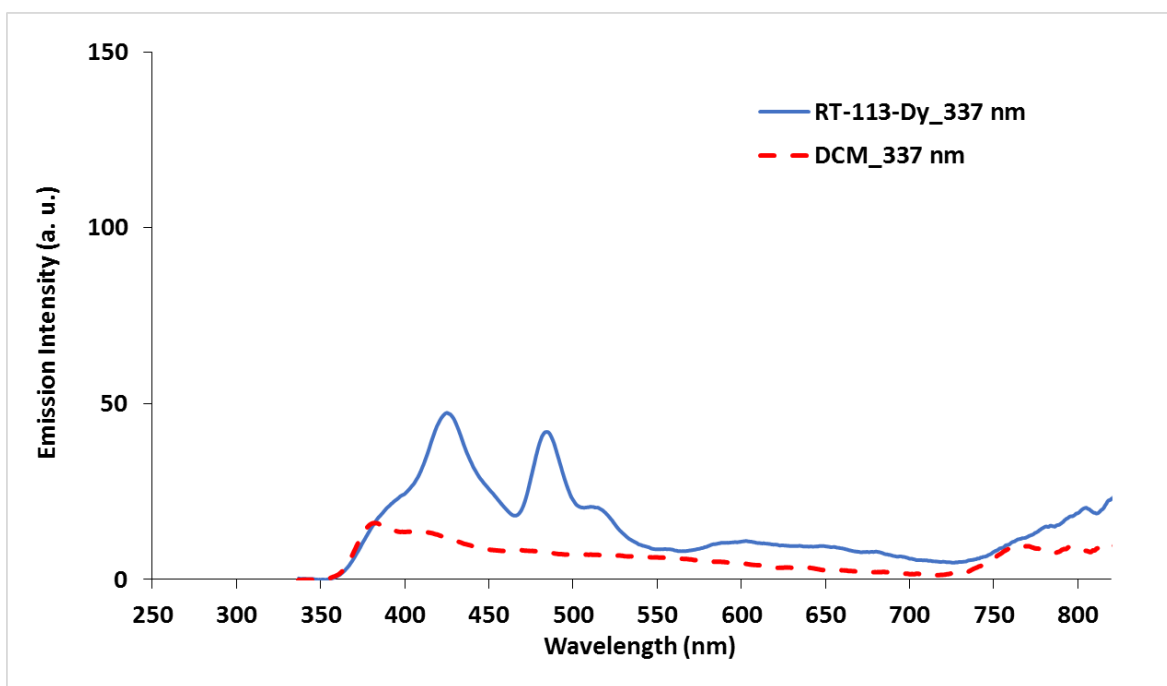

**Figure S22.** Emission profiles of **2** in DCM (blue line) and the solvent DCM (red dashed line) at room temperature;  $\lambda_{\text{exc}} = 337$  nm.

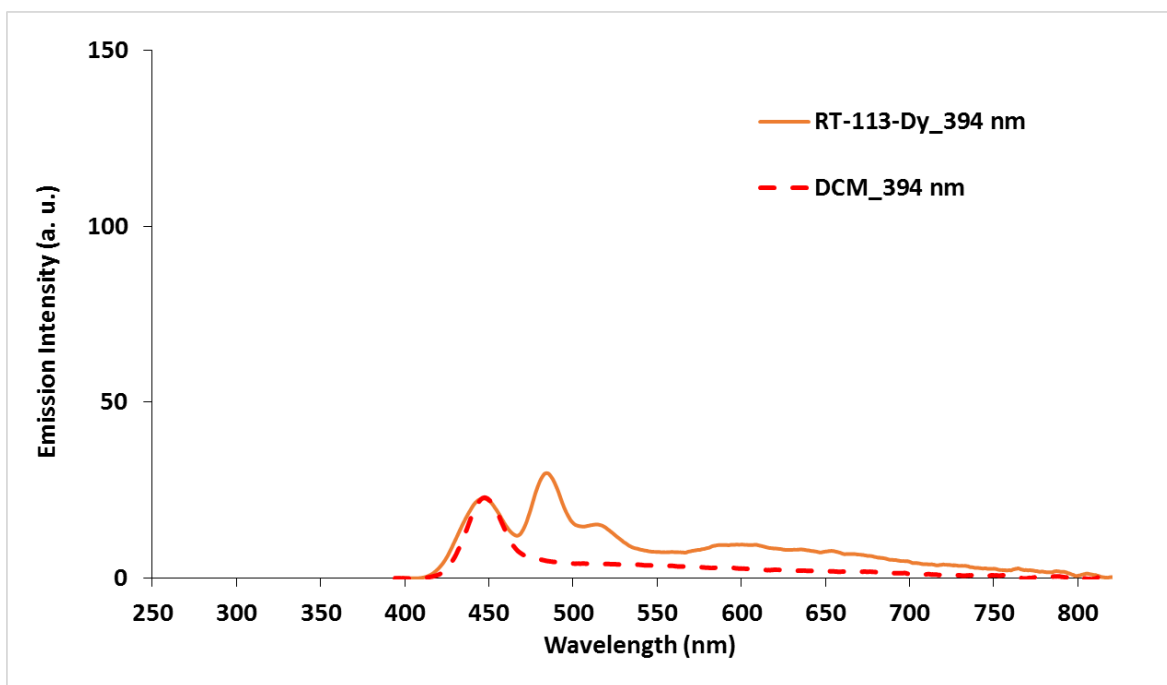

**Figure S23.** Emission profiles of **2** in DCM (orange line) and the solvent DCM (red dashed line) at room temperature;  $\lambda_{\text{exc}} = 394$  nm.

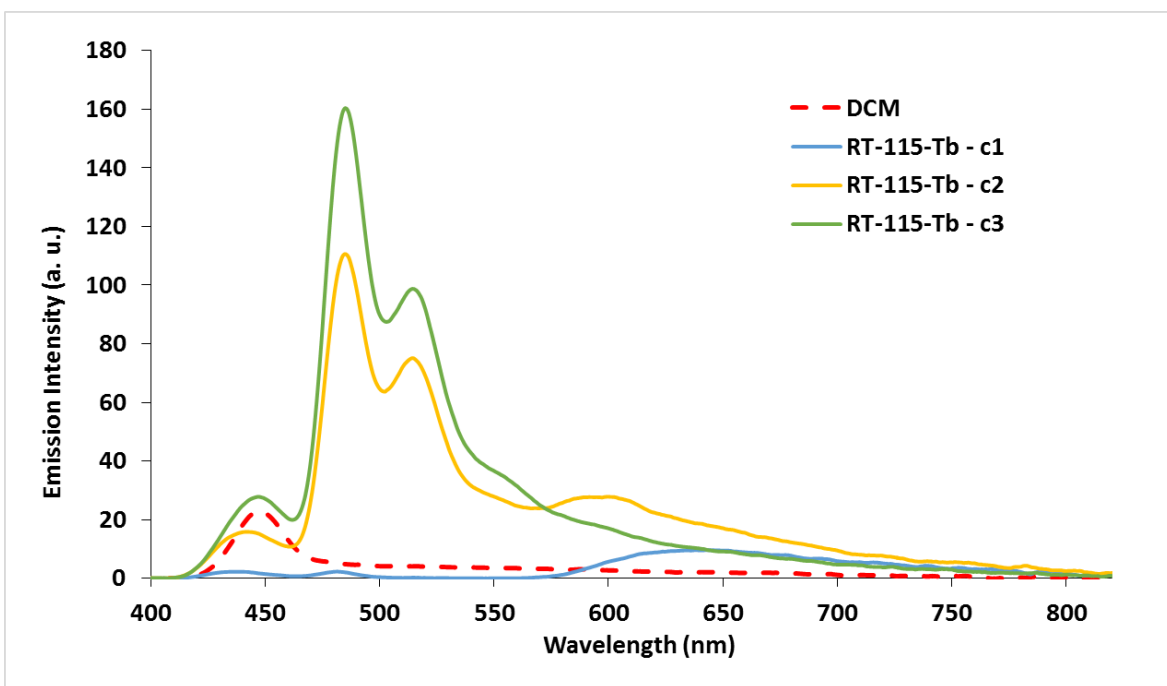

**Figure S24.** Emission profile of **3** at different concentrations in DCM at room temperature;  $\lambda_{\text{exc}} = 394$  nm; c1 =  $1.0 \times 10^{-4}$  M; c2 =  $5.7 \times 10^{-5}$  M; c3 =  $9.5 \times 10^{-6}$  M.

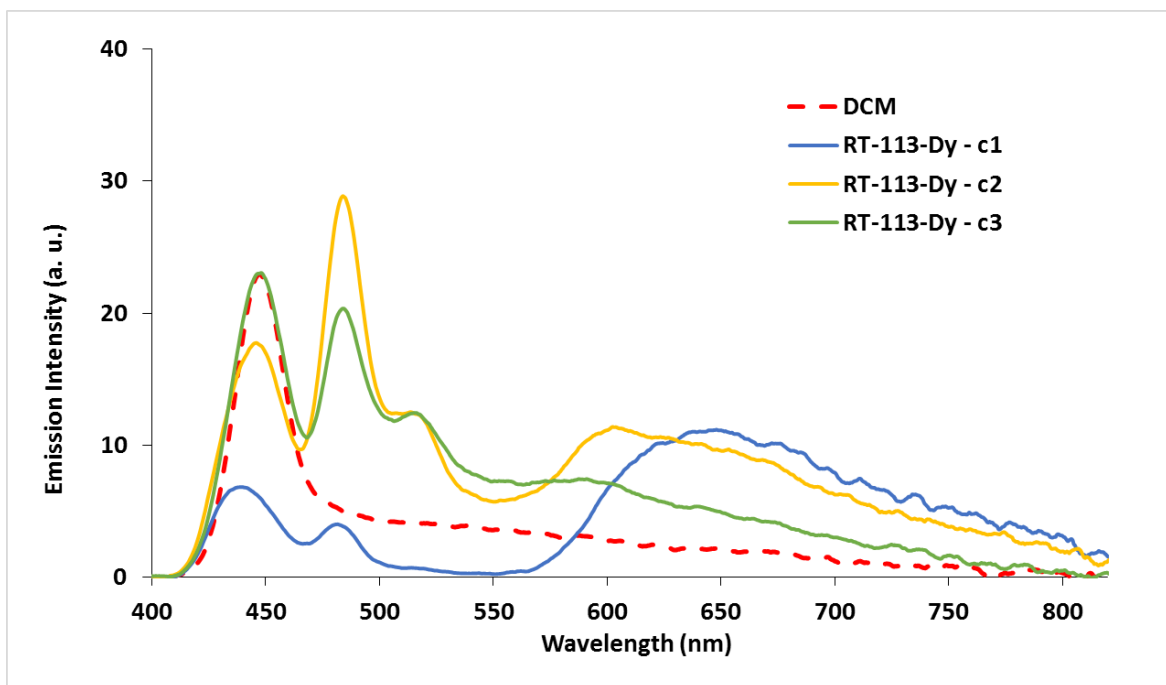

**Figure S25.** Emission profile of **2** at different concentrations in DCM at room temperature;  $\lambda_{\text{exc}} = 394 \text{ nm}$ ;  $c1 = 2.1 \times 10^{-4} \text{ M}$ ;  $c2 = 4.2 \times 10^{-5} \text{ M}$ ;  $c3 = 6.9 \times 10^{-6} \text{ M}$

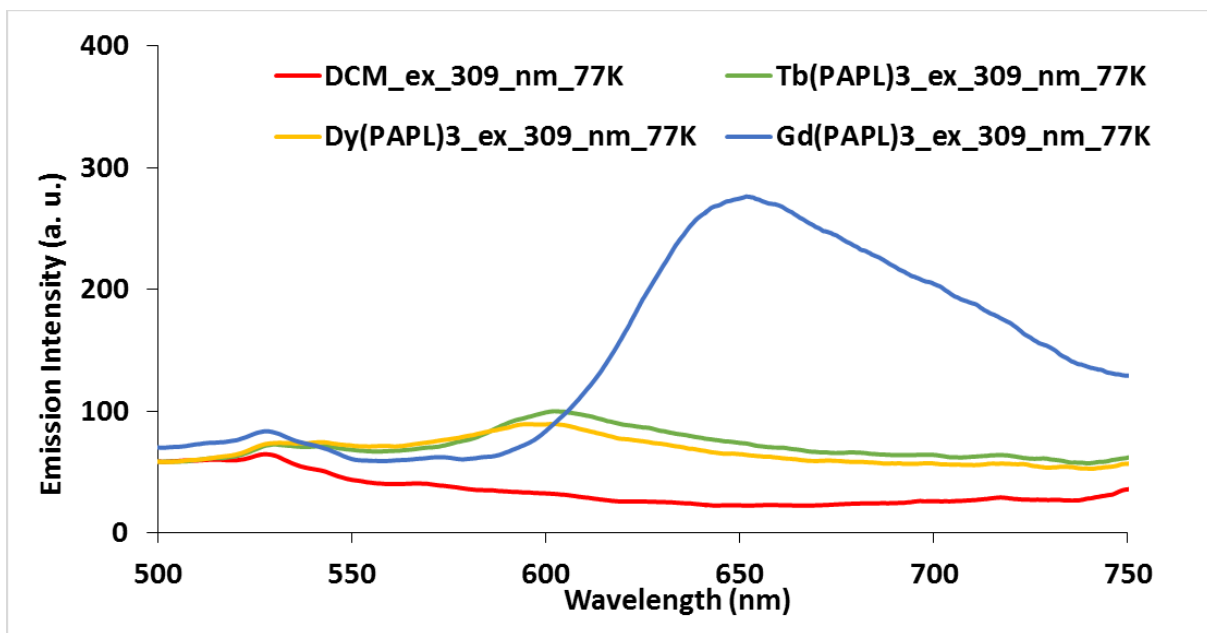

**Figure S26.** Emission profile of **1** (blue line), **2** (yellow line), **3** (green line) in DCM and DCM (red line) at 77 K;  $\lambda_{\text{exc}} = 309 \text{ nm}$ .
