# Supplementary material
Source: MDPI journal article supplement (https://www.mdpi.com/2304-6740/6/2/56)
Supplement: s1 [file s1]

Archive with 3 entries (3 files):
- checkcif_d1789a_a_sq.pdf
- d1789a_a_sq.cif
- Supporting Information_Inorganics Lemaire_V4_R2.pdf
