# Supplementary material
Source: MDPI journal article supplement (https://www.mdpi.com/2304-6740/6/2/56)
Supplement: s1 [file s1 › d1789a_a_sq.cif]

 
data_d1789a_a_sq 
  
_audit_creation_method            'SHELXL-2014/7' 
_shelx_SHELXL_version_number      '2014/7' 
_chemical_name_systematic         ? 
_chemical_name_common             ? 
_chemical_melting_point           ? 
_chemical_formula_moiety          'C69 H42 Ho N9 O3'  
_chemical_formula_sum 
 'C69 H42 Ho N9 O3' 
_chemical_formula_weight          1210.04 

# start Validation Reply Form
_vrf_PLAT605_d1789a_a_sq
;
PROBLEM: Largest Solvent Accessible VOID in the Structure   156 A**3
RESPONSE: During the 
refinement of the structure, electron density peaks were located 
that were believed to be highly disordered 
solvent molecules (possibly CHCl2/CH3CN). Attempts 
made to model the solvent molecule were not successful. 
The SQUEEZE option in PLATON (Spek, 2009) indicated there was a 
large solvent cavity of 156A**3 . In the final cycles of refinement, 
this contribution of 65 electrons to the 
electron density was removed from the observed data. The 
density, the F(000) value, the molecular weight and the formula are 
given without taking into account the results obtained with the 
SQUEEZE option PLATON (Spek, 2009). Similar treatments of disordered 
solvent molecules were carried out by St\"ahler et al. (2001), 
Cox et al. (2003), Mohamed et al. (2003) and Athimoolam et al. (2005). 
References: 
  
Spek, A. L. (2009). <i>Acta Cryst.</i> <b>D65</b>, 148--155.
  
Athimoolam, S., Kumar, J., Ramakrishnan, V. & Rajaram, R.K. (2005). 
Acta Cryst. E61, m2014-m2017. 
  
Cox, J.P., Kumarasammy, Y., Nahar, L., Sarkar D.S. & Shoeb, M. 
(2003). Acta Cryst. E59, o975-o977. 
  
Mohamed, A.A., Krause Bauer, A.J., Bruce, E.A. & Bruce M.R.M. 
(2003). Acta Cryst. C59, m84-m86. 
  
St\"ahler, R., N\"ather, C. & Bensch, W. (2001). Acta Cryst. 
C57, 26-27. 
;
  
loop_ 
 _atom_type_symbol 
 _atom_type_description 
 _atom_type_scat_dispersion_real 
 _atom_type_scat_dispersion_imag 
 _atom_type_scat_source 
 'C'  'C'   0.0033   0.0016 
 'International Tables Vol C Tables 4.2.6.8 and 6.1.1.4' 
 'H'  'H'   0.0000   0.0000 
 'International Tables Vol C Tables 4.2.6.8 and 6.1.1.4' 
 'N'  'N'   0.0061   0.0033 
 'International Tables Vol C Tables 4.2.6.8 and 6.1.1.4' 
 'O'  'O'   0.0106   0.0060 
 'International Tables Vol C Tables 4.2.6.8 and 6.1.1.4' 
 'Ho'  'Ho'  -0.2175   4.6783 
 'International Tables Vol C Tables 4.2.6.8 and 6.1.1.4' 
  
_space_group_crystal_system       monoclinic 
_space_group_IT_number            15 
_space_group_name_H-M_alt         'C 2/c' 
_space_group_name_Hall            '-C 2yc' 
  
_shelx_space_group_comment 
; 
The symmetry employed for this shelxl refinement is uniquely defined 
by the following loop, which should always be used as a source of 
symmetry information in preference to the above space-group names. 
They are only intended as comments. 
; 
  
loop_ 
 _space_group_symop_operation_xyz 
 'x, y, z' 
 '-x, y, -z+1/2' 
 'x+1/2, y+1/2, z' 
 '-x+1/2, y+1/2, -z+1/2' 
 '-x, -y, -z' 
 'x, -y, z-1/2' 
 '-x+1/2, -y+1/2, -z' 
 'x+1/2, -y+1/2, z-1/2' 
  
_cell_length_a                    17.0922(15) 
_cell_length_b                    22.4119(17) 
_cell_length_c                    15.7288(14) 
_cell_angle_alpha                 90 
_cell_angle_beta                  92.427(3) 
_cell_angle_gamma                 90 
_cell_volume                      6019.8(9) 
_cell_formula_units_Z             4 
_cell_measurement_temperature     150(2) 
_cell_measurement_reflns_used     9976 
_cell_measurement_theta_min       2.39 
_cell_measurement_theta_max       26.62 
  
_exptl_crystal_description        needle 
_exptl_crystal_colour             red 
_exptl_crystal_density_meas       ? 
_exptl_crystal_density_method     ? 
_exptl_crystal_density_diffrn     1.335 
_exptl_crystal_F_000              2440 
_exptl_transmission_factor_min    ? 
_exptl_transmission_factor_max    ? 
_exptl_crystal_size_max           0.220 
_exptl_crystal_size_mid           0.120 
_exptl_crystal_size_min           0.100 
_exptl_absorpt_coefficient_mu     1.368 
_shelx_estimated_absorpt_T_min    0.753 
_shelx_estimated_absorpt_T_max    0.875 
_exptl_absorpt_correction_type    multi-scan
_exptl_absorpt_correction_T_min   0.6314 
_exptl_absorpt_correction_T_max   0.7456
_exptl_absorpt_process_details    'SADABS (Bruker, 2014)' 
_exptl_absorpt_special_details    ? 
_diffrn_ambient_temperature       150(2) 
_diffrn_radiation_wavelength      0.71073 
_diffrn_radiation_type            MoK\a 
_diffrn_source                    
'sealed tube with Bruker Triumph monochromator'
_diffrn_measurement_device_type   'Bruker Kappa APEX-DUO CCD' 
_diffrn_measurement_method        '\f and \w scans' 
_diffrn_detector_area_resol_mean  ? 
_diffrn_reflns_number             55440 
_diffrn_reflns_av_unetI/netI      0.0605 
_diffrn_reflns_av_R_equivalents   0.0859 
_diffrn_reflns_limit_h_min        -22 
_diffrn_reflns_limit_h_max        17 
_diffrn_reflns_limit_k_min        -29 
_diffrn_reflns_limit_k_max        29 
_diffrn_reflns_limit_l_min        -20 
_diffrn_reflns_limit_l_max        20 
_diffrn_reflns_theta_min          1.499 
_diffrn_reflns_theta_max          27.549 
_diffrn_reflns_theta_full         25.242 
_diffrn_measured_fraction_theta_max   0.999 
_diffrn_measured_fraction_theta_full  1.000 
_diffrn_reflns_Laue_measured_fraction_max    0.999 
_diffrn_reflns_Laue_measured_fraction_full   1.000 
_diffrn_reflns_point_group_measured_fraction_max   0.999 
_diffrn_reflns_point_group_measured_fraction_full  1.000 
_reflns_number_total              6963 
_reflns_number_gt                 5145 
_reflns_threshold_expression      'I > 2\s(I)' 
_reflns_Friedel_coverage          0.000 
_reflns_Friedel_fraction_max      . 
_reflns_Friedel_fraction_full     . 
  
_reflns_special_details 
; 
 Reflections were merged by SHELXL according to the crystal 
 class for the calculation of statistics and refinement. 
  
 Structure factors included contributions from the .fab file. 
  
 _reflns_Friedel_fraction is defined as the number of unique 
 Friedel pairs measured divided by the number that would be 
 possible theoretically, ignoring centric projections and 
 systematic absences. 
; 
  
_computing_data_collection        'APEX2 (Bruker, 2014)'
_computing_cell_refinement        'APEX2' 
_computing_data_reduction         'SAINT (Bruker, 2014)'
_computing_structure_solution     'SHELXT (Sheldrick, 2015a)'  
_computing_structure_refinement 'SHELXL-2014/7 (Sheldrick, 2015b)' 
_computing_molecular_graphics     'PLATON (Spek, 2009)'  
_computing_publication_material   'SHELXTL (Sheldrick, 2008)' 
_refine_special_details           ? 
_refine_ls_structure_factor_coef  Fsqd 
_refine_ls_matrix_type            full 
_refine_ls_weighting_scheme       calc 
_refine_ls_weighting_details 
'w=1/[\s^2^(Fo^2^)+(0.0015P)^2^+117.9823P] where P=(Fo^2^+2Fc^2^)/3' 
_atom_sites_solution_primary      ? 
_atom_sites_solution_secondary    ? 
_atom_sites_solution_hydrogens    geom 
_refine_ls_hydrogen_treatment     constr 
_refine_ls_extinction_method      none 
_refine_ls_extinction_coef        . 
_refine_ls_number_reflns          6963 
_refine_ls_number_parameters      492 
_refine_ls_number_restraints      306 
_refine_ls_R_factor_all           0.1398 
_refine_ls_R_factor_gt            0.1087 
_refine_ls_wR_factor_ref          0.2178 
_refine_ls_wR_factor_gt           0.2078 
_refine_ls_goodness_of_fit_ref    1.370 
_refine_ls_restrained_S_all       1.357 
_refine_ls_shift/su_max           0.002 
_refine_ls_shift/su_mean          0.000 
  
loop_ 
 _atom_site_label 
 _atom_site_type_symbol 
 _atom_site_fract_x 
 _atom_site_fract_y 
 _atom_site_fract_z 
 _atom_site_U_iso_or_equiv 
 _atom_site_adp_type 
 _atom_site_occupancy 
 _atom_site_site_symmetry_order 
 _atom_site_calc_flag 
 _atom_site_refinement_flags_posn 
 _atom_site_refinement_flags_adp 
 _atom_site_refinement_flags_occupancy 
 _atom_site_disorder_assembly 
 _atom_site_disorder_group 
Ho1 Ho 0.5000 0.31933(3) 0.7500 0.0610(3) Uani 1 2 d DS T P . . 
C15 C 0.6163(5) 0.4433(4) 0.7242(5) 0.035(2) Uani 1 1 d D . . . . 
C16 C 0.6468(7) 0.4923(4) 0.6835(6) 0.053(3) Uani 1 1 d D . . . . 
H16A H 0.6575 0.4901 0.6249 0.064 Uiso 1 1 calc R U . . . 
C17 C 0.6616(7) 0.5447(4) 0.7282(7) 0.059(3) Uani 1 1 d D . . . . 
H17A H 0.6821 0.5780 0.6991 0.070 Uiso 1 1 calc R U . . . 
C18 C 0.6477(7) 0.5499(4) 0.8128(7) 0.060(3) Uani 1 1 d D . . . . 
H18 H 0.6583 0.5863 0.8421 0.072 Uiso 1 1 calc R U . . . 
C19 C 0.6173(7) 0.5005(4) 0.8556(6) 0.053(3) Uani 1 1 d D . . . . 
C20 C 0.6050(7) 0.5014(6) 0.9448(7) 0.067(3) Uani 1 1 d D . . . . 
H20A H 0.6171 0.5358 0.9779 0.081 Uiso 1 1 calc R U . . . 
C21 C 0.5756(8) 0.4518(6) 0.9808(7) 0.079(4) Uani 1 1 d D . . . . 
H21A H 0.5688 0.4508 1.0404 0.095 Uiso 1 1 calc R U . . . 
C22 C 0.5554(7) 0.4021(5) 0.9308(6) 0.065(3) Uani 1 1 d D . . . . 
H22A H 0.5324 0.3688 0.9576 0.078 Uiso 1 1 calc R U . . . 
N3 N 0.5664(5) 0.3990(3) 0.8487(4) 0.043(2) Uani 1 1 d D . . . . 
C23 C 0.5972(6) 0.4476(4) 0.8101(6) 0.046(3) Uani 1 1 d D . . . . 
N1 N 0.6439(5) 0.3824(3) 0.6168(4) 0.0391(19) Uani 1 1 d D . . . . 
N2 N 0.6008(5) 0.3872(3) 0.6834(4) 0.041(2) Uani 1 1 d D . . . . 
C1 C 0.5809(7) 0.2904(4) 0.5616(6) 0.054(3) Uani 1 1 d D . . . . 
C2 C 0.5767(6) 0.2477(4) 0.4910(6) 0.050(3) Uani 1 1 d D . . . . 
C3 C 0.5183(8) 0.2039(4) 0.4892(8) 0.078(4) Uani 1 1 d D . . . . 
H3A H 0.4820 0.2027 0.5332 0.094 Uiso 1 1 calc R U . . . 
C4 C 0.5127(9) 0.1630(5) 0.4249(8) 0.088(5) Uani 1 1 d D . . . . 
H4A H 0.4740 0.1326 0.4253 0.106 Uiso 1 1 calc R U . . . 
C5 C 0.5639(8) 0.1661(5) 0.3595(8) 0.076(4) Uani 1 1 d D . . . . 
H5A H 0.5587 0.1387 0.3135 0.091 Uiso 1 1 calc R U . . . 
C6 C 0.6220(7) 0.2081(5) 0.3603(7) 0.064(3) Uani 1 1 d D . . . . 
H6A H 0.6578 0.2085 0.3157 0.077 Uiso 1 1 calc R U . . . 
C7 C 0.6299(7) 0.2505(4) 0.4252(6) 0.050(3) Uani 1 1 d D . . . . 
C8 C 0.6934(6) 0.2945(4) 0.4298(6) 0.047(3) Uani 1 1 d D . . . . 
C13 C 0.6967(6) 0.3363(4) 0.4970(6) 0.048(3) Uani 1 1 d D . . . . 
C14 C 0.6383(6) 0.3350(3) 0.5620(5) 0.041(2) Uani 1 1 d D . . . . 
O1 O 0.5290(5) 0.2870(3) 0.6181(5) 0.079(3) Uani 1 1 d D . . . . 
C9 C 0.7510(7) 0.2981(5) 0.3691(7) 0.059(3) Uani 1 1 d D . . . . 
H9A H 0.7490 0.2707 0.3229 0.071 Uiso 1 1 calc R U . . . 
C10 C 0.8090(8) 0.3386(5) 0.3738(7) 0.072(4) Uani 1 1 d D . . . . 
H10A H 0.8465 0.3397 0.3309 0.087 Uiso 1 1 calc R U . . . 
C11 C 0.8144(7) 0.3788(5) 0.4412(7) 0.064(3) Uani 1 1 d D . . . . 
H11A H 0.8563 0.4066 0.4456 0.077 Uiso 1 1 calc R U . . . 
C12 C 0.7581(6) 0.3778(4) 0.5014(6) 0.046(2) Uani 1 1 d D . . . . 
H12A H 0.7610 0.4058 0.5467 0.055 Uiso 1 1 calc R U . . . 
C15A C 0.4142(15) 0.1835(8) 0.680(2) 0.055(6) Uani 0.5 1 d D U P A -1 
C16A C 0.4122(12) 0.1248(7) 0.6520(15) 0.055(5) Uani 0.5 1 d D U P A -1 
H16B H 0.4545 0.0987 0.6661 0.066 Uiso 0.5 1 calc R U P A -1 
C17A C 0.3479(12) 0.1043(8) 0.6039(16) 0.071(6) Uani 0.5 1 d D U P A -1 
H17B H 0.3478 0.0643 0.5841 0.085 Uiso 0.5 1 calc R U P A -1 
C18A C 0.2847(12) 0.1397(8) 0.5838(15) 0.065(5) Uani 0.5 1 d D U P A -1 
H18A H 0.2423 0.1251 0.5487 0.078 Uiso 0.5 1 calc R U P A -1 
C19A C 0.2838(10) 0.1983(7) 0.6161(14) 0.066(5) Uani 0.5 1 d D U P A -1 
C20A C 0.2179(11) 0.2369(8) 0.6003(14) 0.082(6) Uani 0.5 1 d D U P A -1 
H20B H 0.1729 0.2243 0.5675 0.098 Uiso 0.5 1 calc R U P A -1 
C21A C 0.2233(12) 0.2923(9) 0.635(2) 0.080(6) Uani 0.5 1 d D U P A -1 
H21B H 0.1793 0.3182 0.6303 0.096 Uiso 0.5 1 calc R U P A -1 
C22A C 0.2922(10) 0.3123(7) 0.6764(12) 0.066(5) Uani 0.5 1 d D U P A -1 
H22B H 0.2927 0.3518 0.6981 0.079 Uiso 0.5 1 calc R U P A -1 
N3A N 0.3569(8) 0.2802(6) 0.6881(11) 0.063(5) Uani 0.5 1 d D U P A -1 
C23A C 0.3497(10) 0.2216(7) 0.6631(16) 0.058(5) Uani 0.5 1 d D U P A -1 
N1A N 0.5149(9) 0.1648(5) 0.7729(9) 0.056(4) Uani 0.5 1 d D U P A -1 
N2A N 0.4760(8) 0.2073(4) 0.7335(10) 0.052(3) Uani 0.5 1 d D U P A -1 
C1A C 0.6261(10) 0.2281(7) 0.8195(14) 0.055(4) Uani 0.5 1 d D U P A -1 
C2A C 0.7045(9) 0.2292(7) 0.8601(11) 0.062(4) Uani 0.5 1 d D U P A -1 
C3A C 0.7504(12) 0.2804(9) 0.8510(17) 0.071(6) Uani 0.5 1 d D U P A -1 
H3AA H 0.7302 0.3132 0.8186 0.085 Uiso 0.5 1 calc R U P A -1 
C4A C 0.8238(11) 0.2835(10) 0.8883(14) 0.081(6) Uani 0.5 1 d D U P A -1 
H4AA H 0.8544 0.3187 0.8841 0.097 Uiso 0.5 1 calc R U P A -1 
C5A C 0.8524(11) 0.2345(10) 0.9320(16) 0.099(7) Uani 0.5 1 d D U P A -1 
H5AA H 0.9037 0.2361 0.9577 0.119 Uiso 0.5 1 calc R U P A -1 
C6A C 0.8096(10) 0.1835(9) 0.9397(13) 0.091(5) Uani 0.5 1 d D U P A -1 
H6AA H 0.8323 0.1503 0.9692 0.110 Uiso 0.5 1 calc R U P A -1 
C7A C 0.7333(9) 0.1791(7) 0.9054(13) 0.072(4) Uani 0.5 1 d D U P A -1 
C8A C 0.6833(11) 0.1267(8) 0.9150(17) 0.076(5) Uani 0.5 1 d D U P A -1 
C13A C 0.6073(12) 0.1265(8) 0.8763(16) 0.069(5) Uani 0.5 1 d D U P A -1 
C14A C 0.5825(16) 0.1755(10) 0.820(3) 0.059(7) Uani 0.5 1 d D U P A -1 
O1A O 0.6074(7) 0.2738(5) 0.7747(8) 0.059(4) Uani 0.5 1 d D U P A -1 
C9A C 0.7065(12) 0.0764(8) 0.9625(14) 0.092(6) Uani 0.5 1 d D U P A -1 
H9AA H 0.7574 0.0758 0.9892 0.110 Uiso 0.5 1 calc R U P A -1 
C10A C 0.6595(14) 0.0292(9) 0.9717(17) 0.104(8) Uani 0.5 1 d D U P A -1 
H10B H 0.6767 -0.0031 1.0068 0.125 Uiso 0.5 1 calc R U P A -1 
C11A C 0.5860(14) 0.0269(8) 0.9304(18) 0.103(8) Uani 0.5 1 d D U P A -1 
H11B H 0.5542 -0.0077 0.9344 0.124 Uiso 0.5 1 calc R U P A -1 
C12A C 0.5598(11) 0.0757(7) 0.8837(15) 0.085(6) Uani 0.5 1 d D U P A -1 
H12B H 0.5093 0.0750 0.8562 0.101 Uiso 0.5 1 calc R U P A -1 
  
loop_ 
 _atom_site_aniso_label 
 _atom_site_aniso_U_11 
 _atom_site_aniso_U_22 
 _atom_site_aniso_U_33 
 _atom_site_aniso_U_23 
 _atom_site_aniso_U_13 
 _atom_site_aniso_U_12 
Ho1 0.1120(7) 0.0241(3) 0.0510(4) 0.000 0.0517(4) 0.000 
C15 0.043(6) 0.036(4) 0.026(4) -0.006(3) -0.004(4) 0.010(4) 
C16 0.088(9) 0.037(5) 0.035(5) 0.000(4) 0.008(5) 0.002(5) 
C17 0.078(9) 0.038(5) 0.060(7) -0.004(5) 0.009(6) -0.010(5) 
C18 0.078(9) 0.047(6) 0.054(7) -0.017(5) 0.003(6) 0.005(6) 
C19 0.063(7) 0.051(6) 0.046(6) -0.010(5) 0.017(5) 0.012(5) 
C20 0.079(9) 0.084(8) 0.041(6) -0.025(6) 0.019(6) 0.003(7) 
C21 0.095(10) 0.109(11) 0.034(6) -0.020(7) 0.030(6) 0.004(9) 
C22 0.082(9) 0.078(8) 0.036(6) 0.001(5) 0.027(6) 0.011(7) 
N3 0.051(5) 0.049(4) 0.029(4) -0.007(3) 0.010(4) 0.009(4) 
C23 0.067(7) 0.039(5) 0.031(5) -0.001(4) 0.013(5) 0.017(5) 
N1 0.059(5) 0.033(4) 0.026(4) -0.001(3) 0.007(4) 0.006(4) 
N2 0.071(6) 0.031(4) 0.023(4) -0.005(3) 0.016(4) 0.001(4) 
C1 0.092(9) 0.026(4) 0.046(6) -0.002(4) 0.038(6) 0.000(5) 
C2 0.078(8) 0.034(5) 0.041(5) -0.006(4) 0.026(5) 0.004(5) 
C3 0.130(12) 0.040(5) 0.069(8) -0.017(5) 0.055(8) -0.014(7) 
C4 0.133(13) 0.052(7) 0.084(9) -0.031(6) 0.048(9) -0.019(7) 
C5 0.116(12) 0.056(7) 0.057(7) -0.026(6) 0.019(8) -0.002(7) 
C6 0.093(10) 0.057(7) 0.044(6) -0.011(5) 0.029(6) 0.020(7) 
C7 0.081(8) 0.037(5) 0.034(5) -0.003(4) 0.024(5) 0.013(5) 
C8 0.071(7) 0.042(5) 0.029(5) 0.005(4) 0.023(5) 0.019(5) 
C13 0.076(8) 0.035(5) 0.037(5) 0.005(4) 0.028(5) 0.012(5) 
C14 0.070(7) 0.030(4) 0.025(4) 0.001(3) 0.023(4) 0.007(4) 
O1 0.139(8) 0.037(4) 0.067(5) -0.021(3) 0.075(5) -0.031(4) 
C9 0.075(8) 0.057(6) 0.048(6) -0.006(5) 0.031(6) 0.013(6) 
C10 0.083(9) 0.078(8) 0.060(7) -0.006(6) 0.043(7) 0.005(7) 
C11 0.066(8) 0.064(7) 0.063(7) -0.004(6) 0.027(6) 0.009(6) 
C12 0.061(7) 0.045(5) 0.033(5) 0.001(4) 0.008(5) 0.014(5) 
C15A 0.088(9) 0.034(7) 0.047(13) -0.001(6) 0.033(9) -0.029(5) 
C16A 0.083(10) 0.033(7) 0.051(12) -0.006(6) 0.026(8) -0.026(6) 
C17A 0.091(11) 0.055(9) 0.068(13) -0.008(8) 0.016(9) -0.033(7) 
C18A 0.088(11) 0.062(8) 0.047(12) -0.005(7) 0.019(9) -0.032(7) 
C19A 0.094(9) 0.060(8) 0.045(11) -0.002(7) 0.026(7) -0.030(6) 
C20A 0.103(10) 0.080(9) 0.064(12) 0.002(8) 0.024(9) -0.019(7) 
C21A 0.111(12) 0.076(10) 0.055(14) 0.005(9) 0.027(10) -0.019(8) 
C22A 0.105(11) 0.058(9) 0.039(9) 0.006(7) 0.034(8) -0.016(7) 
N3A 0.110(11) 0.044(7) 0.037(10) 0.001(6) 0.030(8) -0.020(6) 
C23A 0.092(9) 0.045(7) 0.040(11) -0.002(6) 0.028(7) -0.023(5) 
N1A 0.094(7) 0.028(5) 0.049(9) 0.000(5) 0.038(6) -0.002(6) 
N2A 0.084(8) 0.023(5) 0.052(7) -0.002(5) 0.031(5) -0.015(5) 
C1A 0.085(8) 0.040(6) 0.044(9) -0.008(5) 0.043(6) 0.007(6) 
C2A 0.083(8) 0.062(7) 0.044(8) -0.015(6) 0.041(6) 0.010(6) 
C3A 0.089(10) 0.072(9) 0.055(13) -0.012(8) 0.037(8) 0.002(7) 
C4A 0.084(10) 0.105(12) 0.056(12) -0.027(9) 0.033(8) 0.007(8) 
C5A 0.110(11) 0.118(12) 0.073(14) -0.012(10) 0.038(9) 0.020(9) 
C6A 0.101(9) 0.112(12) 0.063(11) -0.013(9) 0.041(8) 0.026(7) 
C7A 0.103(9) 0.071(7) 0.047(9) -0.005(7) 0.049(7) 0.024(6) 
C8A 0.106(9) 0.066(8) 0.058(11) -0.001(7) 0.046(7) 0.025(6) 
C13A 0.110(9) 0.048(7) 0.053(10) 0.005(7) 0.047(7) 0.021(6) 
C14A 0.089(9) 0.039(7) 0.052(14) -0.003(8) 0.038(9) 0.006(7) 
O1A 0.101(11) 0.036(6) 0.042(8) -0.009(5) 0.036(7) 0.002(6) 
C9A 0.126(13) 0.077(9) 0.076(13) 0.015(9) 0.045(10) 0.031(8) 
C10A 0.128(14) 0.073(10) 0.115(17) 0.021(10) 0.047(12) 0.033(9) 
C11A 0.134(14) 0.061(9) 0.117(18) 0.031(10) 0.043(12) 0.024(9) 
C12A 0.118(11) 0.049(8) 0.090(14) 0.013(8) 0.044(9) 0.018(7) 
  
_geom_special_details 
; 
 All esds (except the esd in the dihedral angle between two l.s. planes) 
 are estimated using the full covariance matrix.  The cell esds are taken 
 into account individually in the estimation of esds in distances, angles 
 and torsion angles; correlations between esds in cell parameters are only 
 used when they are defined by crystal symmetry.  An approximate (isotropic) 
 treatment of cell esds is used for estimating esds involving l.s. planes. 
; 
  
loop_ 
 _geom_bond_atom_site_label_1 
 _geom_bond_atom_site_label_2 
 _geom_bond_distance 
 _geom_bond_site_symmetry_2 
 _geom_bond_publ_flag 
Ho1 O1A 2.122(11) . ? 
Ho1 O1 2.273(6) 2_656 ? 
Ho1 O1 2.273(6) . ? 
Ho1 N2A 2.555(10) . ? 
Ho1 N2 2.557(7) 2_656 ? 
Ho1 N2 2.557(7) . ? 
Ho1 N3 2.596(8) 2_656 ? 
Ho1 N3 2.596(8) . ? 
Ho1 N3A 2.737(12) . ? 
C15 C16 1.384(12) . ? 
C15 C23 1.407(11) . ? 
C15 N2 1.431(10) . ? 
C16 C17 1.386(13) . ? 
C16 H16A 0.9500 . ? 
C17 C18 1.367(14) . ? 
C17 H17A 0.9500 . ? 
C18 C19 1.407(14) . ? 
C18 H18 0.9500 . ? 
C19 C23 1.420(13) . ? 
C19 C20 1.426(13) . ? 
C20 C21 1.353(16) . ? 
C20 H20A 0.9500 . ? 
C21 C22 1.398(15) . ? 
C21 H21A 0.9500 . ? 
C22 N3 1.314(11) . ? 
C22 H22A 0.9500 . ? 
N3 C23 1.364(11) . ? 
N1 N2 1.308(8) . ? 
N1 C14 1.370(10) . ? 
C1 O1 1.283(10) . ? 
C1 C14 1.399(12) . ? 
C1 C2 1.465(12) . ? 
C2 C3 1.399(14) . ? 
C2 C7 1.409(12) . ? 
C3 C4 1.365(14) . ? 
C3 H3A 0.9500 . ? 
C4 C5 1.380(15) . ? 
C4 H4A 0.9500 . ? 
C5 C6 1.370(15) . ? 
C5 H5A 0.9500 . ? 
C6 C7 1.397(13) . ? 
C6 H6A 0.9500 . ? 
C7 C8 1.466(14) . ? 
C8 C9 1.403(12) . ? 
C8 C13 1.409(12) . ? 
C13 C12 1.403(13) . ? 
C13 C14 1.460(11) . ? 
C9 C10 1.344(15) . ? 
C9 H9A 0.9500 . ? 
C10 C11 1.391(15) . ? 
C10 H10A 0.9500 . ? 
C11 C12 1.378(12) . ? 
C11 H11A 0.9500 . ? 
C12 H12A 0.9500 . ? 
C15A C16A 1.386(14) . ? 
C15A C23A 1.409(13) . ? 
C15A N2A 1.429(12) . ? 
C16A C17A 1.384(15) . ? 
C16A H16B 0.9500 . ? 
C17A C18A 1.367(16) . ? 
C17A H17B 0.9500 . ? 
C18A C19A 1.408(15) . ? 
C18A H18A 0.9500 . ? 
C19A C23A 1.420(15) . ? 
C19A C20A 1.434(15) . ? 
C20A C21A 1.357(18) . ? 
C20A H20B 0.9500 . ? 
C21A C22A 1.397(17) . ? 
C21A H21B 0.9500 . ? 
C22A N3A 1.325(13) . ? 
C22A H22B 0.9500 . ? 
N3A C23A 1.376(13) . ? 
N1A N2A 1.303(11) . ? 
N1A C14A 1.369(13) . ? 
C1A O1A 1.276(12) . ? 
C1A C14A 1.395(14) . ? 
C1A C2A 1.460(14) . ? 
C2A C3A 1.402(16) . ? 
C2A C7A 1.407(14) . ? 
C3A C4A 1.364(16) . ? 
C3A H3AA 0.9500 . ? 
C4A C5A 1.376(17) . ? 
C4A H4AA 0.9500 . ? 
C5A C6A 1.364(17) . ? 
C5A H5AA 0.9500 . ? 
C6A C7A 1.394(15) . ? 
C6A H6AA 0.9500 . ? 
C7A C8A 1.465(16) . ? 
C8A C9A 1.399(14) . ? 
C8A C13A 1.410(15) . ? 
C13A C12A 1.405(15) . ? 
C13A C14A 1.461(13) . ? 
C9A C10A 1.341(17) . ? 
C9A H9AA 0.9500 . ? 
C10A C11A 1.391(17) . ? 
C10A H10B 0.9500 . ? 
C11A C12A 1.382(15) . ? 
C11A H11B 0.9500 . ? 
C12A H12B 0.9500 . ? 
  
loop_ 
 _geom_angle_atom_site_label_1 
 _geom_angle_atom_site_label_2 
 _geom_angle_atom_site_label_3 
 _geom_angle 
 _geom_angle_site_symmetry_1 
 _geom_angle_site_symmetry_3 
 _geom_angle_publ_flag 
O1A Ho1 O1 84.3(4) . 2_656 ? 
O1A Ho1 O1 78.1(4) . . ? 
O1 Ho1 O1 142.8(3) 2_656 . ? 
O1A Ho1 N2A 71.4(4) . . ? 
O1 Ho1 N2A 74.9(4) 2_656 . ? 
O1 Ho1 N2A 68.6(4) . . ? 
O1A Ho1 N2 143.5(4) . 2_656 ? 
O1 Ho1 N2 68.8(2) 2_656 2_656 ? 
O1 Ho1 N2 137.8(3) . 2_656 ? 
N2A Ho1 N2 121.2(4) . 2_656 ? 
O1A Ho1 N2 76.6(4) . . ? 
O1 Ho1 N2 137.8(3) 2_656 . ? 
O1 Ho1 N2 68.8(2) . . ? 
N2A Ho1 N2 130.6(4) . . ? 
N2 Ho1 N2 106.9(3) 2_656 . ? 
O1A Ho1 N3 142.5(4) . 2_656 ? 
O1 Ho1 N3 131.2(2) 2_656 2_656 ? 
O1 Ho1 N3 77.3(3) . 2_656 ? 
N2A Ho1 N3 123.4(3) . 2_656 ? 
N2 Ho1 N3 63.3(2) 2_656 2_656 ? 
N2 Ho1 N3 68.3(2) . 2_656 ? 
O1A Ho1 N3 82.4(4) . . ? 
O1 Ho1 N3 77.3(3) 2_656 . ? 
O1 Ho1 N3 131.2(2) . . ? 
N2A Ho1 N3 143.2(3) . . ? 
N2 Ho1 N3 68.3(2) 2_656 . ? 
N2 Ho1 N3 63.3(2) . . ? 
N3 Ho1 N3 93.1(3) 2_656 . ? 
O1A Ho1 N3A 131.6(4) . . ? 
O1 Ho1 N3A 89.8(5) 2_656 . ? 
O1 Ho1 N3A 78.4(4) . . ? 
N2A Ho1 N3A 60.8(3) . . ? 
N2 Ho1 N3A 74.3(4) 2_656 . ? 
N2 Ho1 N3A 130.7(4) . . ? 
N3 Ho1 N3A 69.3(4) 2_656 . ? 
N3 Ho1 N3A 142.6(4) . . ? 
C16 C15 C23 119.8(8) . . ? 
C16 C15 N2 123.7(7) . . ? 
C23 C15 N2 116.4(7) . . ? 
C15 C16 C17 120.2(9) . . ? 
C15 C16 H16A 119.9 . . ? 
C17 C16 H16A 119.9 . . ? 
C18 C17 C16 122.0(9) . . ? 
C18 C17 H17A 119.0 . . ? 
C16 C17 H17A 119.0 . . ? 
C17 C18 C19 118.9(9) . . ? 
C17 C18 H18 120.6 . . ? 
C19 C18 H18 120.6 . . ? 
C18 C19 C23 120.1(9) . . ? 
C18 C19 C20 122.2(10) . . ? 
C23 C19 C20 117.7(9) . . ? 
C21 C20 C19 118.2(10) . . ? 
C21 C20 H20A 120.9 . . ? 
C19 C20 H20A 120.9 . . ? 
C20 C21 C22 120.4(10) . . ? 
C20 C21 H21A 119.8 . . ? 
C22 C21 H21A 119.8 . . ? 
N3 C22 C21 123.5(10) . . ? 
N3 C22 H22A 118.2 . . ? 
C21 C22 H22A 118.2 . . ? 
C22 N3 C23 118.0(8) . . ? 
C22 N3 Ho1 123.1(7) . . ? 
C23 N3 Ho1 116.8(6) . . ? 
N3 C23 C15 118.9(8) . . ? 
N3 C23 C19 122.2(8) . . ? 
C15 C23 C19 118.7(8) . . ? 
N2 N1 C14 122.7(7) . . ? 
N1 N2 C15 109.4(7) . . ? 
N1 N2 Ho1 133.6(5) . . ? 
C15 N2 Ho1 117.0(5) . . ? 
O1 C1 C14 123.0(8) . . ? 
O1 C1 C2 118.1(9) . . ? 
C14 C1 C2 118.8(8) . . ? 
C3 C2 C7 119.9(9) . . ? 
C3 C2 C1 119.1(8) . . ? 
C7 C2 C1 121.0(9) . . ? 
C4 C3 C2 120.9(10) . . ? 
C4 C3 H3A 119.5 . . ? 
C2 C3 H3A 119.5 . . ? 
C3 C4 C5 119.4(12) . . ? 
C3 C4 H4A 120.3 . . ? 
C5 C4 H4A 120.3 . . ? 
C6 C5 C4 120.7(10) . . ? 
C6 C5 H5A 119.7 . . ? 
C4 C5 H5A 119.7 . . ? 
C5 C6 C7 121.5(10) . . ? 
C5 C6 H6A 119.3 . . ? 
C7 C6 H6A 119.3 . . ? 
C6 C7 C2 117.5(10) . . ? 
C6 C7 C8 122.8(9) . . ? 
C2 C7 C8 119.6(8) . . ? 
C9 C8 C13 117.8(10) . . ? 
C9 C8 C7 122.9(9) . . ? 
C13 C8 C7 119.3(8) . . ? 
C12 C13 C8 118.9(8) . . ? 
C12 C13 C14 120.8(8) . . ? 
C8 C13 C14 120.3(9) . . ? 
N1 C14 C1 126.0(7) . . ? 
N1 C14 C13 113.2(8) . . ? 
C1 C14 C13 120.7(8) . . ? 
C1 O1 Ho1 142.8(7) . . ? 
C10 C9 C8 122.6(10) . . ? 
C10 C9 H9A 118.7 . . ? 
C8 C9 H9A 118.7 . . ? 
C9 C10 C11 120.2(10) . . ? 
C9 C10 H10A 119.9 . . ? 
C11 C10 H10A 119.9 . . ? 
C12 C11 C10 119.2(11) . . ? 
C12 C11 H11A 120.4 . . ? 
C10 C11 H11A 120.4 . . ? 
C11 C12 C13 121.3(9) . . ? 
C11 C12 H12A 119.3 . . ? 
C13 C12 H12A 119.3 . . ? 
C16A C15A C23A 120.5(12) . . ? 
C16A C15A N2A 123.2(12) . . ? 
C23A C15A N2A 115.9(11) . . ? 
C17A C16A C15A 119.6(13) . . ? 
C17A C16A H16B 120.2 . . ? 
C15A C16A H16B 120.2 . . ? 
C18A C17A C16A 122.3(14) . . ? 
C18A C17A H17B 118.8 . . ? 
C16A C17A H17B 118.8 . . ? 
C17A C18A C19A 118.6(13) . . ? 
C17A C18A H18A 120.7 . . ? 
C19A C18A H18A 120.7 . . ? 
C18A C19A C23A 120.6(12) . . ? 
C18A C19A C20A 121.3(13) . . ? 
C23A C19A C20A 118.0(12) . . ? 
C21A C20A C19A 116.3(14) . . ? 
C21A C20A H20B 121.9 . . ? 
C19A C20A H20B 121.9 . . ? 
C20A C21A C22A 121.5(15) . . ? 
C20A C21A H21B 119.2 . . ? 
C22A C21A H21B 119.2 . . ? 
N3A C22A C21A 125.0(14) . . ? 
N3A C22A H22B 117.5 . . ? 
C21A C22A H22B 117.5 . . ? 
C22A N3A C23A 114.4(12) . . ? 
C22A N3A Ho1 127.1(10) . . ? 
C23A N3A Ho1 118.4(8) . . ? 
N3A C23A C15A 117.7(11) . . ? 
N3A C23A C19A 124.0(11) . . ? 
C15A C23A C19A 118.1(11) . . ? 
N2A N1A C14A 122.2(11) . . ? 
N1A N2A C15A 111.0(11) . . ? 
N1A N2A Ho1 126.4(8) . . ? 
C15A N2A Ho1 122.5(10) . . ? 
O1A C1A C14A 124.2(12) . . ? 
O1A C1A C2A 115.5(12) . . ? 
C14A C1A C2A 119.4(11) . . ? 
C3A C2A C7A 121.3(12) . . ? 
C3A C2A C1A 118.4(12) . . ? 
C7A C2A C1A 120.2(12) . . ? 
C4A C3A C2A 120.4(14) . . ? 
C4A C3A H3AA 119.8 . . ? 
C2A C3A H3AA 119.8 . . ? 
C3A C4A C5A 118.4(16) . . ? 
C3A C4A H4AA 120.8 . . ? 
C5A C4A H4AA 120.8 . . ? 
C6A C5A C4A 122.2(15) . . ? 
C6A C5A H5AA 118.9 . . ? 
C4A C5A H5AA 118.9 . . ? 
C5A C6A C7A 121.4(14) . . ? 
C5A C6A H6AA 119.3 . . ? 
C7A C6A H6AA 119.3 . . ? 
C6A C7A C2A 116.2(13) . . ? 
C6A C7A C8A 123.9(13) . . ? 
C2A C7A C8A 119.9(12) . . ? 
C9A C8A C13A 117.6(13) . . ? 
C9A C8A C7A 123.1(13) . . ? 
C13A C8A C7A 119.3(11) . . ? 
C12A C13A C8A 119.4(12) . . ? 
C12A C13A C14A 120.3(12) . . ? 
C8A C13A C14A 119.8(12) . . ? 
N1A C14A C1A 125.7(11) . . ? 
N1A C14A C13A 114.5(11) . . ? 
C1A C14A C13A 119.9(12) . . ? 
C1A O1A Ho1 132.9(11) . . ? 
C10A C9A C8A 122.4(15) . . ? 
C10A C9A H9AA 118.8 . . ? 
C8A C9A H9AA 118.8 . . ? 
C9A C10A C11A 120.8(15) . . ? 
C9A C10A H10B 119.6 . . ? 
C11A C10A H10B 119.6 . . ? 
C12A C11A C10A 119.0(15) . . ? 
C12A C11A H11B 120.5 . . ? 
C10A C11A H11B 120.5 . . ? 
C11A C12A C13A 120.7(14) . . ? 
C11A C12A H12B 119.7 . . ? 
C13A C12A H12B 119.7 . . ? 
  
loop_ 
 _geom_torsion_atom_site_label_1 
 _geom_torsion_atom_site_label_2 
 _geom_torsion_atom_site_label_3 
 _geom_torsion_atom_site_label_4 
 _geom_torsion 
 _geom_torsion_site_symmetry_1 
 _geom_torsion_site_symmetry_2 
 _geom_torsion_site_symmetry_3 
 _geom_torsion_site_symmetry_4 
 _geom_torsion_publ_flag 
C23 C15 C16 C17 2.8(16) . . . . ? 
N2 C15 C16 C17 -178.6(10) . . . . ? 
C15 C16 C17 C18 0.5(19) . . . . ? 
C16 C17 C18 C19 0.0(19) . . . . ? 
C17 C18 C19 C23 -3.7(18) . . . . ? 
C17 C18 C19 C20 176.7(11) . . . . ? 
C18 C19 C20 C21 -179.9(12) . . . . ? 
C23 C19 C20 C21 0.5(18) . . . . ? 
C19 C20 C21 C22 -2(2) . . . . ? 
C20 C21 C22 N3 3(2) . . . . ? 
C21 C22 N3 C23 -2.0(17) . . . . ? 
C21 C22 N3 Ho1 -164.9(10) . . . . ? 
C22 N3 C23 C15 174.2(10) . . . . ? 
Ho1 N3 C23 C15 -21.8(12) . . . . ? 
C22 N3 C23 C19 0.0(15) . . . . ? 
Ho1 N3 C23 C19 164.0(8) . . . . ? 
C16 C15 C23 N3 179.2(10) . . . . ? 
N2 C15 C23 N3 0.5(14) . . . . ? 
C16 C15 C23 C19 -6.4(15) . . . . ? 
N2 C15 C23 C19 174.9(9) . . . . ? 
C18 C19 C23 N3 -178.9(10) . . . . ? 
C20 C19 C23 N3 0.7(16) . . . . ? 
C18 C19 C23 C15 6.9(16) . . . . ? 
C20 C19 C23 C15 -173.5(10) . . . . ? 
C14 N1 N2 C15 -175.9(8) . . . . ? 
C14 N1 N2 Ho1 3.9(14) . . . . ? 
C16 C15 N2 N1 22.6(13) . . . . ? 
C23 C15 N2 N1 -158.7(8) . . . . ? 
C16 C15 N2 Ho1 -157.2(8) . . . . ? 
C23 C15 N2 Ho1 21.4(11) . . . . ? 
O1 C1 C2 C3 -2.0(17) . . . . ? 
C14 C1 C2 C3 -178.5(11) . . . . ? 
O1 C1 C2 C7 177.5(10) . . . . ? 
C14 C1 C2 C7 1.1(16) . . . . ? 
C7 C2 C3 C4 1(2) . . . . ? 
C1 C2 C3 C4 -179.4(13) . . . . ? 
C2 C3 C4 C5 -2(2) . . . . ? 
C3 C4 C5 C6 3(2) . . . . ? 
C4 C5 C6 C7 -2(2) . . . . ? 
C5 C6 C7 C2 1.2(18) . . . . ? 
C5 C6 C7 C8 177.4(11) . . . . ? 
C3 C2 C7 C6 -0.6(17) . . . . ? 
C1 C2 C7 C6 179.9(10) . . . . ? 
C3 C2 C7 C8 -176.9(11) . . . . ? 
C1 C2 C7 C8 3.6(16) . . . . ? 
C6 C7 C8 C9 0.5(17) . . . . ? 
C2 C7 C8 C9 176.6(10) . . . . ? 
C6 C7 C8 C13 179.3(10) . . . . ? 
C2 C7 C8 C13 -4.6(15) . . . . ? 
C9 C8 C13 C12 -1.8(15) . . . . ? 
C7 C8 C13 C12 179.3(9) . . . . ? 
C9 C8 C13 C14 179.9(9) . . . . ? 
C7 C8 C13 C14 1.0(14) . . . . ? 
N2 N1 C14 C1 9.1(15) . . . . ? 
N2 N1 C14 C13 -174.7(8) . . . . ? 
O1 C1 C14 N1 -5.1(18) . . . . ? 
C2 C1 C14 N1 171.2(9) . . . . ? 
O1 C1 C14 C13 179.0(10) . . . . ? 
C2 C1 C14 C13 -4.7(15) . . . . ? 
C12 C13 C14 N1 9.1(13) . . . . ? 
C8 C13 C14 N1 -172.7(9) . . . . ? 
C12 C13 C14 C1 -174.6(10) . . . . ? 
C8 C13 C14 C1 3.7(15) . . . . ? 
C14 C1 O1 Ho1 -17(2) . . . . ? 
C2 C1 O1 Ho1 166.7(8) . . . . ? 
C13 C8 C9 C10 1.2(17) . . . . ? 
C7 C8 C9 C10 180.0(11) . . . . ? 
C8 C9 C10 C11 1(2) . . . . ? 
C9 C10 C11 C12 -2.1(19) . . . . ? 
C10 C11 C12 C13 1.4(17) . . . . ? 
C8 C13 C12 C11 0.6(15) . . . . ? 
C14 C13 C12 C11 178.9(10) . . . . ? 
C23A C15A C16A C17A 4(5) . . . . ? 
N2A C15A C16A C17A 176(3) . . . . ? 
C15A C16A C17A C18A -2(4) . . . . ? 
C16A C17A C18A C19A -3(4) . . . . ? 
C17A C18A C19A C23A 5(4) . . . . ? 
C17A C18A C19A C20A -177(2) . . . . ? 
C18A C19A C20A C21A 180(3) . . . . ? 
C23A C19A C20A C21A -2(4) . . . . ? 
C19A C20A C21A C22A 6(4) . . . . ? 
C20A C21A C22A N3A -1(4) . . . . ? 
C21A C22A N3A C23A -6(3) . . . . ? 
C21A C22A N3A Ho1 171.4(19) . . . . ? 
C22A N3A C23A C15A -175(3) . . . . ? 
Ho1 N3A C23A C15A 7(3) . . . . ? 
C22A N3A C23A C19A 10(3) . . . . ? 
Ho1 N3A C23A C19A -168(2) . . . . ? 
C16A C15A C23A N3A -177(3) . . . . ? 
N2A C15A C23A N3A 10(5) . . . . ? 
C16A C15A C23A C19A -1(5) . . . . ? 
N2A C15A C23A C19A -175(3) . . . . ? 
C18A C19A C23A N3A 172(2) . . . . ? 
C20A C19A C23A N3A -6(4) . . . . ? 
C18A C19A C23A C15A -3(4) . . . . ? 
C20A C19A C23A C15A 179(3) . . . . ? 
C14A N1A N2A C15A 172(4) . . . . ? 
C14A N1A N2A Ho1 -10(3) . . . . ? 
C16A C15A N2A N1A -19(5) . . . . ? 
C23A C15A N2A N1A 154(3) . . . . ? 
C16A C15A N2A Ho1 162(3) . . . . ? 
C23A C15A N2A Ho1 -25(4) . . . . ? 
O1A C1A C2A C3A 4(3) . . . . ? 
C14A C1A C2A C3A 173(3) . . . . ? 
O1A C1A C2A C7A -175(2) . . . . ? 
C14A C1A C2A C7A -5(3) . . . . ? 
C7A C2A C3A C4A -2(4) . . . . ? 
C1A C2A C3A C4A 180(2) . . . . ? 
C2A C3A C4A C5A 2(4) . . . . ? 
C3A C4A C5A C6A -1(4) . . . . ? 
C4A C5A C6A C7A -2(4) . . . . ? 
C5A C6A C7A C2A 2(3) . . . . ? 
C5A C6A C7A C8A -177(2) . . . . ? 
C3A C2A C7A C6A 0(3) . . . . ? 
C1A C2A C7A C6A 178(2) . . . . ? 
C3A C2A C7A C8A 179(2) . . . . ? 
C1A C2A C7A C8A -3(3) . . . . ? 
C6A C7A C8A C9A 2(4) . . . . ? 
C2A C7A C8A C9A -177(2) . . . . ? 
C6A C7A C8A C13A -179(3) . . . . ? 
C2A C7A C8A C13A 2(4) . . . . ? 
C9A C8A C13A C12A -3(4) . . . . ? 
C7A C8A C13A C12A 179(2) . . . . ? 
C9A C8A C13A C14A -175(3) . . . . ? 
C7A C8A C13A C14A 6(4) . . . . ? 
N2A N1A C14A C1A -13(6) . . . . ? 
N2A N1A C14A C13A 165(2) . . . . ? 
O1A C1A C14A N1A 1(6) . . . . ? 
C2A C1A C14A N1A -168(3) . . . . ? 
O1A C1A C14A C13A -178(3) . . . . ? 
C2A C1A C14A C13A 14(5) . . . . ? 
C12A C13A C14A N1A -5(5) . . . . ? 
C8A C13A C14A N1A 167(3) . . . . ? 
C12A C13A C14A C1A 174(3) . . . . ? 
C8A C13A C14A C1A -14(5) . . . . ? 
C14A C1A O1A Ho1 44(4) . . . . ? 
C2A C1A O1A Ho1 -146.3(13) . . . . ? 
C13A C8A C9A C10A 0(4) . . . . ? 
C7A C8A C9A C10A 179(3) . . . . ? 
C8A C9A C10A C11A 3(5) . . . . ? 
C9A C10A C11A C12A -4(5) . . . . ? 
C10A C11A C12A C13A 1(4) . . . . ? 
C8A C13A C12A C11A 2(4) . . . . ? 
C14A C13A C12A C11A 174(3) . . . . ? 
  
_refine_diff_density_max    0.828 
_refine_diff_density_min   -1.366 
_refine_diff_density_rms    0.121 
  
_shelx_res_file 
; 
  
    d1789a_a_sq.res created by SHELXL-2014/7 
  
  
TITL d1789a_a.res in C2/c 
REM Old TITL d1789a in C2/c 
  
REM SHELXT solution in C2/c 
REM R1 0.343,  Rweak 0.035,  Alpha 0.085,  Orientation as input 
REM Formula found by SHELXT:  C71 N6 O8 Ho 
  
CELL  0.71073  17.0922  22.4119  15.7288   90.000   92.427   90.000 
ZERR    4.000   0.0015   0.0017   0.0014    0.000    0.003    0.000 
LATT  7 
SYMM -X, Y, 1/2-Z 
SFAC C H N O HO 
UNIT 276 168 36 12 4 
TEMP -122.890 
SIZE 0.10 0.12 0.22 
ACTA 
L.S. 5 0   61 
BOND $H 
CONF 
FMAP 2 
PLAN 20 
RIGU C15A > C12A 
ABIN 
SADI Ho1 O1 Ho1 O1A 
SADI Ho1 N2 Ho1 N2A 
SADI Ho1 N3 Ho1 N3A 
WGHT    0.001500  117.982300 
FVAR       0.15436 
HO1   5    0.500000    0.319327    0.750000    10.50000    0.11200    0.02405 = 
         0.05102    0.00000    0.05168    0.00000 
C15   1    0.616287    0.443333    0.724232    11.00000    0.04269    0.03553 = 
         0.02649   -0.00591   -0.00399    0.01009 
C16   1    0.646757    0.492346    0.683546    11.00000    0.08778    0.03703 = 
         0.03538    0.00022    0.00793    0.00216 
AFIX  43 
H16A  2    0.657509    0.490069    0.624870    11.00000   -1.20000 
AFIX   0 
C17   1    0.661626    0.544736    0.728165    11.00000    0.07811    0.03791 = 
         0.06005   -0.00383    0.00935   -0.00970 
AFIX  43 
H17A  2    0.682127    0.578034    0.699083    11.00000   -1.20000 
AFIX   0 
C18   1    0.647669    0.549920    0.812770    11.00000    0.07846    0.04679 = 
         0.05373   -0.01719    0.00338    0.00537 
AFIX  43 
H18   2    0.658316    0.586257    0.842132    11.00000   -1.20000 
AFIX   0 
C19   1    0.617265    0.500525    0.855647    11.00000    0.06288    0.05117 = 
         0.04590   -0.00964    0.01709    0.01235 
C20   1    0.604971    0.501380    0.944755    11.00000    0.07853    0.08379 = 
         0.04144   -0.02475    0.01948    0.00260 
AFIX  43 
H20A  2    0.617054    0.535841    0.977944    11.00000   -1.20000 
AFIX   0 
C21   1    0.575648    0.451818    0.980760    11.00000    0.09517    0.10945 = 
         0.03444   -0.01951    0.02989    0.00360 
AFIX  43 
H21A  2    0.568786    0.450768    1.040363    11.00000   -1.20000 
AFIX   0 
C22   1    0.555372    0.402116    0.930787    11.00000    0.08171    0.07846 = 
         0.03628    0.00061    0.02682    0.01058 
AFIX  43 
H22A  2    0.532381    0.368835    0.957587    11.00000   -1.20000 
AFIX   0 
N3    3    0.566426    0.398991    0.848717    11.00000    0.05128    0.04906 = 
         0.02901   -0.00665    0.01018    0.00899 
C23   1    0.597224    0.447600    0.810138    11.00000    0.06669    0.03928 = 
         0.03143   -0.00084    0.01251    0.01731 
N1    3    0.643850    0.382430    0.616848    11.00000    0.05892    0.03258 = 
         0.02637   -0.00077    0.00723    0.00641 
N2    3    0.600840    0.387249    0.683357    11.00000    0.07106    0.03085 = 
         0.02339   -0.00470    0.01613    0.00101 
C1    1    0.580906    0.290415    0.561623    11.00000    0.09164    0.02632 = 
         0.04567   -0.00161    0.03762   -0.00012 
C2    1    0.576651    0.247712    0.491027    11.00000    0.07752    0.03379 = 
         0.04113   -0.00629    0.02597    0.00422 
C3    1    0.518275    0.203931    0.489156    11.00000    0.12973    0.03955 = 
         0.06883   -0.01733    0.05499   -0.01399 
AFIX  43 
H3A   2    0.481963    0.202679    0.533207    11.00000   -1.20000 
AFIX   0 
C4    1    0.512738    0.162977    0.424930    11.00000    0.13255    0.05206 = 
         0.08421   -0.03087    0.04796   -0.01868 
AFIX  43 
H4A   2    0.473986    0.132601    0.425268    11.00000   -1.20000 
AFIX   0 
C5    1    0.563898    0.166070    0.359518    11.00000    0.11617    0.05624 = 
         0.05712   -0.02643    0.01903   -0.00193 
AFIX  43 
H5A   2    0.558736    0.138734    0.313461    11.00000   -1.20000 
AFIX   0 
C6    1    0.622043    0.208146    0.360306    11.00000    0.09322    0.05721 = 
         0.04377   -0.01137    0.02944    0.02027 
AFIX  43 
H6A   2    0.657808    0.208518    0.315692    11.00000   -1.20000 
AFIX   0 
C7    1    0.629942    0.250521    0.425227    11.00000    0.08073    0.03750 = 
         0.03428   -0.00341    0.02391    0.01296 
C8    1    0.693375    0.294548    0.429837    11.00000    0.07106    0.04161 = 
         0.02930    0.00470    0.02259    0.01873 
C13   1    0.696680    0.336251    0.496972    11.00000    0.07580    0.03510 = 
         0.03669    0.00516    0.02783    0.01205 
C14   1    0.638257    0.334978    0.562023    11.00000    0.06952    0.03016 = 
         0.02474    0.00073    0.02261    0.00688 
O1    4    0.529050    0.286989    0.618071    11.00000    0.13938    0.03743 = 
         0.06662   -0.02140    0.07487   -0.03148 
C9    1    0.751024    0.298050    0.369142    11.00000    0.07495    0.05725 = 
         0.04833   -0.00647    0.03142    0.01312 
AFIX  43 
H9A   2    0.748978    0.270715    0.322940    11.00000   -1.20000 
AFIX   0 
C10   1    0.809047    0.338564    0.373786    11.00000    0.08265    0.07751 = 
         0.05986   -0.00630    0.04290    0.00493 
AFIX  43 
H10A  2    0.846533    0.339740    0.330915    11.00000   -1.20000 
AFIX   0 
C11   1    0.814379    0.378783    0.441178    11.00000    0.06600    0.06397 = 
         0.06336   -0.00391    0.02696    0.00917 
AFIX  43 
H11A  2    0.856298    0.406594    0.445639    11.00000   -1.20000 
AFIX   0 
C12   1    0.758122    0.377777    0.501353    11.00000    0.06105    0.04469 = 
         0.03252    0.00107    0.00813    0.01392 
AFIX  43 
H12A  2    0.760999    0.405772    0.546730    11.00000   -1.20000 
AFIX   0 
PART -1 
SAME 0.01 C15 > C12 
C15A  1    0.414236    0.183545    0.679509    10.50000    0.08751    0.03412 = 
         0.04690   -0.00116    0.03345   -0.02865 
C16A  1    0.412151    0.124790    0.651992    10.50000    0.08255    0.03348 = 
         0.05057   -0.00631    0.02607   -0.02613 
AFIX  43 
H16B  2    0.454546    0.098697    0.666069    10.50000   -1.20000 
AFIX   0 
C17A  1    0.347944    0.104339    0.603880    10.50000    0.09143    0.05547 = 
         0.06789   -0.00779    0.01572   -0.03298 
AFIX  43 
H17B  2    0.347826    0.064277    0.584144    10.50000   -1.20000 
AFIX   0 
C18A  1    0.284693    0.139749    0.583755    10.50000    0.08762    0.06176 = 
         0.04724   -0.00509    0.01915   -0.03193 
AFIX  43 
H18A  2    0.242270    0.125145    0.548733    10.50000   -1.20000 
AFIX   0 
C19A  1    0.283801    0.198316    0.616057    10.50000    0.09367    0.06040 = 
         0.04496   -0.00166    0.02563   -0.02972 
C20A  1    0.217876    0.236888    0.600258    10.50000    0.10301    0.07965 = 
         0.06380    0.00176    0.02351   -0.01871 
AFIX  43 
H20B  2    0.172876    0.224335    0.567511    10.50000   -1.20000 
AFIX   0 
C21A  1    0.223326    0.292328    0.634679    10.50000    0.11101    0.07577 = 
         0.05458    0.00513    0.02705   -0.01931 
AFIX  43 
H21B  2    0.179285    0.318172    0.630287    10.50000   -1.20000 
AFIX   0 
C22A  1    0.292195    0.312272    0.676419    10.50000    0.10476    0.05786 = 
         0.03854    0.00619    0.03367   -0.01583 
AFIX  43 
H22B  2    0.292664    0.351837    0.698111    10.50000   -1.20000 
AFIX   0 
N3A   3    0.356942    0.280233    0.688084    10.50000    0.11029    0.04438 = 
         0.03749    0.00092    0.02956   -0.01966 
C23A  1    0.349721    0.221570    0.663063    10.50000    0.09169    0.04536 = 
         0.04007   -0.00190    0.02815   -0.02301 
N1A   3    0.514858    0.164802    0.772897    10.50000    0.09363    0.02839 = 
         0.04868    0.00017    0.03848   -0.00235 
N2A   3    0.475974    0.207307    0.733506    10.50000    0.08365    0.02305 = 
         0.05155   -0.00242    0.03091   -0.01505 
C1A   1    0.626058    0.228107    0.819521    10.50000    0.08548    0.03956 = 
         0.04425   -0.00758    0.04281    0.00682 
C2A   1    0.704494    0.229168    0.860093    10.50000    0.08268    0.06218 = 
         0.04437   -0.01515    0.04095    0.01014 
C3A   1    0.750384    0.280424    0.850982    10.50000    0.08851    0.07160 = 
         0.05498   -0.01193    0.03703    0.00178 
AFIX  43 
H3AA  2    0.730236    0.313213    0.818643    10.50000   -1.20000 
AFIX   0 
C4A   1    0.823775    0.283510    0.888257    10.50000    0.08387    0.10527 = 
         0.05567   -0.02699    0.03337    0.00724 
AFIX  43 
H4AA  2    0.854391    0.318686    0.884110    10.50000   -1.20000 
AFIX   0 
C5A   1    0.852426    0.234465    0.932014    10.50000    0.10959    0.11798 = 
         0.07334   -0.01229    0.03832    0.02021 
AFIX  43 
H5AA  2    0.903700    0.236132    0.957684    10.50000   -1.20000 
AFIX   0 
C6A   1    0.809622    0.183520    0.939748    10.50000    0.10130    0.11231 = 
         0.06336   -0.01349    0.04099    0.02570 
AFIX  43 
H6AA  2    0.832303    0.150346    0.969203    10.50000   -1.20000 
AFIX   0 
C7A   1    0.733343    0.179091    0.905375    10.50000    0.10266    0.07139 = 
         0.04713   -0.00535    0.04909    0.02433 
C8A   1    0.683300    0.126671    0.914950    10.50000    0.10629    0.06627 = 
         0.05821   -0.00070    0.04560    0.02525 
C13A  1    0.607322    0.126509    0.876314    10.50000    0.10980    0.04792 = 
         0.05319    0.00476    0.04686    0.02064 
C14A  1    0.582491    0.175488    0.820143    10.50000    0.08941    0.03888 = 
         0.05177   -0.00331    0.03806    0.00641 
O1A   4    0.607429    0.273832    0.774745    10.50000    0.10136    0.03593 = 
         0.04210   -0.00851    0.03555    0.00175 
C9A   1    0.706513    0.076442    0.962463    10.50000    0.12614    0.07712 = 
         0.07596    0.01548    0.04542    0.03065 
AFIX  43 
H9AA  2    0.757411    0.075801    0.989166    10.50000   -1.20000 
AFIX   0 
C10A  1    0.659527    0.029193    0.971664    10.50000    0.12807    0.07303 = 
         0.11464    0.02144    0.04707    0.03322 
AFIX  43 
H10B  2    0.676681   -0.003139    1.006785    10.50000   -1.20000 
AFIX   0 
C11A  1    0.585990    0.026915    0.930440    10.50000    0.13441    0.06109 = 
         0.11702    0.03128    0.04255    0.02435 
AFIX  43 
H11B  2    0.554214   -0.007672    0.934359    10.50000   -1.20000 
AFIX   0 
C12A  1    0.559844    0.075729    0.883687    10.50000    0.11797    0.04865 = 
         0.09024    0.01319    0.04378    0.01776 
AFIX  43 
H12B  2    0.509259    0.074954    0.856249    10.50000   -1.20000 
  
AFIX   0 
HKLF 4 
  
REM  d1789a_a.res in C2/c 
REM R1 =  0.1087 for    5145 Fo > 4sig(Fo)  and  0.1398 for all    6963 data 
REM    492 parameters refined using    306 restraints 
  
END 
  
WGHT      0.0076    120.0320 
  
REM Highest difference peak  0.828,  deepest hole -1.366,  1-sigma level  0.121 
Q1    1   0.4569  0.0520  0.7121  11.00000  0.05    0.83 
Q2    1   0.5000  0.2802  0.7500  10.50000  0.05    0.82 
Q3    1   0.5668  0.2757  0.7423  11.00000  0.05    0.73 
Q4    1   0.5263  0.3521  0.6202  11.00000  0.05    0.71 
Q5    1   0.6637  0.0434  1.0626  11.00000  0.05    0.69 
Q6    1   0.4578  0.3165  0.7085  11.00000  0.05    0.69 
Q7    1   0.5000  0.3565  0.7500  10.50000  0.05    0.67 
Q8    1   0.4962  0.3608  1.1409  11.00000  0.05    0.64 
Q9    1   0.3735  0.3711  0.7110  11.00000  0.05    0.54 
Q10   1   0.1842  0.4337  0.7289  11.00000  0.05    0.52 
Q11   1   0.4499 -0.0116  0.8298  11.00000  0.05    0.48 
Q12   1   0.6670  0.0627  0.2662  11.00000  0.05    0.47 
Q13   1   0.1724  0.2078  0.5663  11.00000  0.05    0.47 
Q14   1   0.6049 -0.0380  0.8780  11.00000  0.05    0.47 
Q15   1   0.8183  0.2568  0.9063  11.00000  0.05    0.46 
Q16   1   0.6013 -0.0226  0.8634  11.00000  0.05    0.46 
Q17   1   0.6463  0.0115  1.2119  11.00000  0.05    0.46 
Q18   1   0.5220  0.3197  0.6616  11.00000  0.05    0.45 
Q19   1   0.3761  0.1983  0.6555  11.00000  0.05    0.44 
Q20   1   0.9719  0.1755  0.8169  11.00000  0.05    0.43 
; 
_shelx_res_checksum   25672 
  
_shelx_hkl_file 
; 
   0   0  -1   -2.50    1.00 
   0   0  -1   -3.20    0.60 
   0   0  -1   -3.00    0.90 
   0   0  -1   -3.50    1.00 
   0   0  -1   -3.10    1.10 
   0   0   1   -3.40    1.00 
   0   0   1   -4.10    1.10 
   0   0   1   -3.20    1.10 
   0   0   1   -3.00    0.40 
   0   0   1   -0.50    1.40 
   0   0   2 2143.29   71.59 
   0   0   2 1822.02   71.49 
   0   0   2 2247.98   70.09 
   0   0   2 2127.89   70.19 
   0   0  -2 2154.98   72.09 
   0   0  -2 2248.58   70.09 
   0   0  -2 2039.50   70.09 
   0   0  -2 2172.08   70.19 
   0   0  -2 2208.98   71.69 
   0   0   2 2128.89   70.19 
   0   0   3    7.80    4.30 
   0   0   3    9.60    4.30 
   0   0  -3   13.70    4.50 
   0   0   3    6.80    4.70 
   0   0   3    7.70    4.40 
   0   0  -3    9.20    4.20 
   0   0  -3   -0.50    3.70 
   0   0  -3   12.70    4.50 
   0   0  -3    8.40    4.30 
   0   0   3    8.70    4.50 
   0   0  -4  146.79   12.40 
   0   0  -4  129.89    9.40 
   0   0  -4  135.09    9.60 
   0   0  -4  135.79   14.20 
   0   0   4  166.68   13.20 
   0   0   4  173.28   14.90 
   0   0   4  153.78    9.70 
   0   0   4  170.68   10.20 
   0   0   4  164.98   10.30 
   0   0  -4  140.29   10.40 
   0   0  -5    0.40    4.70 
   0   0   5   -4.20    5.40 
   0   0  -5    0.50    5.10 
   0   0  -5    2.30    5.80 
   0   0   5   -9.90    5.20 
   0   0   5    0.50    5.40 
   0   0  -5   -0.90    5.70 
   0   0  -5    3.90    5.20 
   0   0   5    2.50    5.40 
   0   0   5   -1.90    5.10 
   0   0   6  187.08   16.20 
   0   0  -6  164.08   17.20 
   0   0   6  194.88   17.60 
   0   0  -6  169.08   11.90 
   0   0  -6  179.88   11.80 
   0   0   6  172.78   11.20 
   0   0   6  181.38   12.00 
   0   0  -6  175.08   11.70 
   0   0  -6  166.98   14.80 
   0   0   6  204.08   12.70 
   0   0  -7   12.50    6.90 
   0   0  -7    6.60    5.60 
   0   0  -7   17.00    6.50 
   0   0   7    7.30    6.00 
   0   0   7    9.90    6.70 
   0   0   7   12.80    7.40 
   0   0   7   -2.30    5.70 
   0   0   7    5.00    6.50 
   0   0  -7    7.20    6.30 
   0   0   8  357.86   18.00 
   0   0  -8  323.77   18.30 
   0   0   8  322.27   23.30 
   0   0   8  357.06   26.00 
   0   0   8  318.27   18.10 
   0   0  -8  330.27   17.80 
   0   0  -8  320.17   21.90 
   0   0   8  341.87   19.50 
   0   0  -8  307.27   17.70 
   0   0   9    5.70    7.50 
   0   0   9    7.80    7.70 
   0   0  -9    7.80    6.70 
   0   0  -9    8.90    7.60 
   0   0  10  434.66   29.30 
   0   0 -10  420.16   22.70 
   0   0 -10  435.96   22.40 
   0   0  10  449.36   23.90 
   0   0  11    1.40    8.70 
   0   0  11   -0.40    8.40 
   0   0 -11   -0.80    8.70 
   0   0 -11    5.30    8.10 
   0   0 -12  373.76   22.50 
   0   0 -12  359.26   21.70 
   0   0  12  384.06   30.60 
   0   0  12  360.26   23.40 
   0   0 -13    5.20    9.80 
   0   0  13   15.90   11.50 
   0   0 -13   -2.30    8.80 
   0   0  13    0.50    9.70 
   0   0  14    6.90   11.50 
   0   0  14   31.20   12.60 
   0   0 -14   21.70   11.00 
   0   0 -15   30.00   12.20 
   0   0  15   24.90   13.00 
   0   0  15   29.80   14.00 
   0   0  16  375.66   37.40 
   0   0 -16  339.37   26.30 
   0   0  16  326.07   26.90 
   0   0 -17    4.90   11.90 
   0   0  17    7.60   13.40 
   0   0  17    4.50   14.60 
   0   0 -18   32.70   14.80 
   0   0  18    1.30   15.10 
   0   0  18   -4.50   15.30 
   0   0 -19   -2.30   14.00 
   0   0  19  -14.40   13.40 
   0   0  19   -6.80   17.30 
   0   0  20   -8.40   14.90 
   0   0 -20   13.50   13.60 
   0   0  20   -2.80   17.50 
   0   2   0 2449.16   78.69 
   0   2   0 2420.66   77.89 
   0   2   0 2417.86   79.09 
   0   2   0 2437.36   77.89 
   0   2   0 2425.36   77.79 
   0  -2   0 2353.86   77.79 
   0  -2   0 2340.47   78.09 
   0  -2   0 2360.76   78.69 
   0  -2   0 2384.56   77.99 
   0  -2   0 2447.35   77.89 
   0   2  -1 1254.77   41.30 
   0   2  -1 1254.37   40.40 
   0   2   1 1288.37   43.10 
   0   2   1 1257.67   41.40 
   0   2  -1 1254.37   42.20 
   0   2   1 1293.57   41.60 
   0   2   1 1218.78   42.10 
   0  -2  -1 1265.87   42.10 
   0  -2  -1 1149.89   42.70 
   0  -2   1 1102.69   40.40 
   0  -2   1 1267.57   41.30 
   0  -2  -1 1200.28   41.40 
   0  -2  -1 1304.07   41.60 
   0   2  -2   63.79    5.90 
   0   2   2   66.99    5.90 
   0   2   2   62.09    7.20 
   0   2   2   81.49    9.30 
   0   2  -2   54.29    3.80 
   0   2   2   57.49    5.70 
   0   2   2   59.59    3.90 
   0  -2   2   57.19    4.30 
   0  -2  -2   55.79    5.50 
   0  -2  -2   63.59    5.90 
   0  -2  -2   60.49    6.70 
   0  -2   2   55.39    4.20 
   0  -2  -2   42.00    5.70 
   0  -2  -2   56.79    3.90 
   0   2  -3 1005.40   33.80 
   0   2   3 1024.20   34.00 
   0   2  -3 1003.00   35.40 
   0   2   3  946.81   35.50 
   0   2   3  968.00   37.10 
   0   2   3  992.30   38.40 
   0  -2  -3  997.70   35.50 
   0  -2   3  993.90   34.30 
   0  -2  -3 1001.30   33.90 
   0  -2  -3  979.30   35.60 
   0  -2  -3 1025.60   39.60 
   0  -2   3  980.20   34.10 
   0  -2  -3  969.50   36.90 
   0   2   4   21.20    6.00 
   0   2  -4   22.20    4.30 
   0   2   4   30.50    5.20 
   0   2   4   27.20    6.60 
   0   2  -4   25.40    4.80 
   0   2  -4   26.30    6.70 
   0  -2  -4   23.20    6.20 
   0  -2  -4   37.30    5.20 
   0  -2   4   13.60    5.40 
   0  -2   4   11.40    5.70 
   0  -2  -4   20.70    5.90 
   0  -2   4   17.10    5.10 
   0  -2   4   29.90    6.40 
   0  -2  -4   14.60    6.70 
   0  -2   4   17.40    5.50 
   0  -2  -4   30.50    6.70 
   0   2   5  482.95   24.20 
   0   2   5  413.86   19.60 
   0   2   5  443.56   20.50 
   0   2   5  441.66   18.60 
   0   2  -5  432.56   18.40 
   0   2  -5  440.66   20.00 
   0   2  -5  443.36   18.60 
   0  -2   5  418.06   19.10 
   0  -2  -5  439.56   20.20 
   0  -2  -5  464.15   22.60 
   0  -2   5  456.35   24.00 
   0  -2  -5  459.55   24.40 
   0  -2  -5  449.46   18.40 
   0  -2   5  462.15   19.40 
   0  -2   5  485.45   24.10 
   0  -2   5  441.76   19.00 
   0  -2  -5  455.05   20.20 
   0   2   6  628.24   27.10 
   0   2  -6  640.14   25.60 
   0   2   6  682.53   31.00 
   0   2   6  648.34   25.40 
   0   2   6  621.84   27.40 
   0   2  -6  659.23   25.60 
   0   2  -6  670.03   27.20 
   0  -2   6  687.43   31.40 
   0  -2  -6  614.24   29.60 
   0  -2   6  648.84   26.20 
   0  -2   6  668.43   31.80 
   0  -2  -6  648.64   25.80 
   0  -2  -6  619.74   27.50 
   0  -2  -6  642.44   27.20 
   0  -2   6  659.43   26.30 
   0  -2  -6  662.43   32.40 
   0   2   7  274.27   22.10 
   0   2  -7  235.58   13.80 
   0   2  -7  234.88   14.00 
   0   2  -7  240.08   15.40 
   0   2   7  264.27   19.50 
   0   2   7  267.47   16.30 
   0   2   7  250.87   15.60 
   0  -2  -7  231.58   21.60 
   0  -2   7  268.87   20.50 
   0  -2  -7  272.87   18.50 
   0  -2   7  256.87   14.70 
   0  -2   7  226.58   14.60 
   0  -2   7  259.17   20.00 
   0  -2  -7  230.98   15.40 
   0  -2  -7  251.27   15.30 
   0  -2   7  230.88   14.80 
   0  -2  -7  247.28   14.50 
   0   2  -8  735.83   29.40 
   0   2   8  731.53   29.60 
   0   2  -8  695.53   31.00 
   0   2  -8  740.33   32.30 
   0   2   8  710.03   31.70 
   0   2   8  736.23   36.30 
   0  -2   8  753.82   30.60 
   0  -2   8  779.42   38.10 
   0  -2  -8  690.53   38.50 
   0  -2  -8  710.73   29.50 
   0  -2  -8  720.93   31.20 
   0  -2  -8  754.82   31.50 
   0  -2  -8  726.33   35.00 
   0  -2   8  692.13   30.60 
   0  -2   8  682.83   30.50 
   0  -2   8  710.73   36.40 
   0   2   9  235.48   16.90 
   0   2   9  215.68   20.50 
   0   2  -9  188.48   13.80 
   0   2   9  243.08   14.60 
   0   2  -9  194.38   15.70 
   0  -2   9  211.08   15.20 
   0  -2  -9  255.77   19.30 
   0  -2  -9  223.08   23.30 
   0  -2  -9  193.18   15.30 
   0  -2   9  226.88   20.90 
   0  -2  -9  222.48   14.50 
   0   2 -10  179.58   13.80 
   0   2  10  166.28   20.40 
   0   2  10  160.48   15.80 
   0   2 -10  198.68   15.80 
   0  -2 -10  175.38   16.20 
   0  -2 -10  157.98   13.50 
   0  -2 -10  184.78   20.60 
   0  -2  10  187.98   15.10 
   0   2  11  191.18   18.40 
   0   2  11  105.29   15.50 
   0   2 -11  157.18   13.70 
   0   2 -11  142.99   15.80 
   0  -2  11  159.48   19.60 
   0  -2 -11  144.09   15.40 
   0  -2 -11  171.08   15.80 
   0  -2  11  171.58   16.60 
   0   2 -12  200.38   15.80 
   0   2 -12  201.78   17.60 
   0   2  12  190.28   18.30 
   0   2  12  139.09   18.00 
   0  -2  12  211.78   24.70 
   0  -2 -12  196.28   16.90 
   0  -2 -12  198.58   17.30 
   0  -2  12  211.58   17.80 
   0   2 -13   97.99   15.70 
   0   2  13   50.69   14.20 
   0   2  13   83.99   14.90 
   0  -2  13   77.19   14.50 
   0  -2  13   56.89   14.00 
   0  -2 -13   84.99   13.40 
   0  -2 -13   81.89   14.40 
   0   2  14    8.50   12.00 
   0   2  14    4.90   11.80 
   0   2 -14   15.30   10.90 
   0  -2  14   12.50   11.90 
   0  -2 -14   19.50   10.70 
   0  -2 -14    8.00    9.40 
   0  -2  14   17.80   11.50 
   0   2  15   63.69   15.70 
   0   2  15   60.59   16.00 
   0   2 -15   83.09   15.50 
   0  -2  15   46.60   15.60 
   0  -2  15  100.29   17.00 
   0  -2 -15   75.39   13.90 
   0   2  16   42.20   16.60 
   0   2 -16  109.09   17.90 
   0   2  16   75.49   17.20 
   0  -2 -16  100.49   17.00 
   0  -2  16   71.79   15.90 
   0  -2  16   76.19   19.30 
   0   2  17   59.19   16.70 
   0   2 -17   63.19   16.00 
   0   2  17   36.20   17.70 
   0  -2  17   20.10   15.90 
   0  -2  17   70.59   17.50 
   0  -2 -17   62.09   14.90 
   0   2 -18   12.40   15.10 
   0   2  18   12.30   14.80 
   0   2  18   -7.70   15.40 
   0  -2  18   12.00   13.70 
   0  -2 -18   21.60   12.80 
   0  -2  18  -20.90   13.80 
   0   2  19   -5.70   16.80 
   0   2  19    4.60   16.50 
   0   2 -19  -25.20   12.00 
   0  -2  19   -2.90   17.50 
   0  -2  19    8.50   14.70 
   0  -2 -19   29.80   15.00 
   0   2  20    6.60   16.80 
   0   2  20  -19.90   16.30 
   0   2 -20   33.80   16.50 
   0  -2  20    4.00   17.30 
   0  -2 -20    0.10   12.00 
   0  -2  20   15.40   17.00 
   0   4   0  324.27   15.10 
   0   4   0  308.07   12.00 
   0   4   0  314.87   12.00 
   0   4   0  306.37   11.80 
   0   4   0  329.97   14.00 
   0  -4   0  308.17   11.80 
   0  -4   0  322.97   12.50 
   0  -4   0  301.97   13.90 
   0  -4   0  309.07   12.30 
   0  -4   0  307.37   12.30 
   0   4  -1   24.70    3.00 
   0   4   1   20.20    4.60 
   0   4   1   12.90    4.50 
   0   4  -1   23.30    4.40 
   0   4   1   18.50    4.50 
   0   4   1   23.00    4.40 
   0   4   1   23.30    4.50 
   0   4   1   24.20    2.20 
   0   4   1   25.50    5.70 
   0   4  -1   19.00    6.70 
   0  -4  -1   20.80    2.20 
   0  -4   1   22.50    2.80 
   0  -4  -1   17.80    4.60 
   0  -4   1   15.00    3.10 
   0  -4  -1   24.50    4.50 
   0  -4  -1   23.00    4.90 
   0  -4   1   22.80    4.30 
   0  -4  -1   21.20    4.60 
   0  -4   1   19.50    3.20 
   0  -4  -1   24.30    5.30 
   0   4   2   81.29    7.90 
   0   4  -2   82.29    4.90 
   0   4  -2   74.39    7.40 
   0   4   2  102.79   11.80 
   0   4  -2   83.39    8.20 
   0   4   2  110.19   12.40 
   0   4   2   77.69    7.70 
   0  -4  -2  113.59   12.70 
   0  -4  -2   79.49    7.60 
   0  -4   2   68.19    5.40 
   0  -4   2   76.79    4.80 
   0  -4  -2   98.69    9.80 
   0  -4   2   82.79    7.50 
   0  -4  -2   80.39    8.00 
   0   4   3  200.68   12.00 
   0   4   3  216.78   14.10 
   0   4  -3  171.78    8.50 
   0   4   3  222.38   16.60 
   0   4  -3  184.08   11.40 
   0   4   3  214.08   11.90 
   0  -4  -3  183.18   11.70 
   0  -4  -3  202.08   16.80 
   0  -4  -3  193.48    8.00 
   0  -4   3  183.28    9.10 
   0  -4  -3  195.48   12.90 
   0  -4  -3  206.18   12.10 
   0  -4   3  183.48    8.80 
   0  -4   3  192.18   11.20 
   0   4   4   29.80    6.60 
   0   4   4   20.70    6.00 
   0   4   4   18.20    6.70 
   0   4  -4   31.80    3.50 
   0   4   4   26.90    7.20 
   0   4  -4   29.10    7.20 
   0  -4  -4   21.20    5.90 
   0  -4  -4   10.00    6.90 
   0  -4   4   27.70    4.70 
   0  -4  -4   24.30    4.10 
   0  -4  -4   31.70    7.00 
   0  -4   4   26.90    5.20 
   0  -4  -4   31.50    7.30 
   0  -4   4   24.60    5.60 
   0   4   5  933.61   33.00 
   0   4   5  929.21   36.20 
   0   4  -5  959.20   35.90 
   0   4  -5  937.21   32.40 
   0   4   5  930.31   38.60 
   0  -4   5  935.71   33.70 
   0  -4  -5  921.51   33.00 
   0  -4   5  934.81   34.00 
   0  -4  -5  891.51   41.50 
   0  -4  -5  955.50   36.30 
   0  -4  -5  931.91   36.30 
   0  -4  -5  928.11   38.00 
   0   4  -6   37.10    5.00 
   0   4  -6   40.70    7.40 
   0   4   6   36.20    5.70 
   0   4   6    6.50    3.60 
   0   4   6   35.70    8.30 
   0   4   6   24.80    7.40 
   0   4   6   22.90    7.60 
   0  -4   6   18.10    7.20 
   0  -4   6   27.00    6.30 
   0  -4  -6   35.10    8.50 
   0  -4  -6   25.30    7.50 
   0  -4   6   14.30    5.90 
   0  -4  -6   40.10    6.10 
   0  -4   6    1.90    4.10 
   0  -4  -6   22.70    8.10 
   0  -4  -6   23.20    6.30 
   0  -4   6   33.90    6.00 
   0   4  -7  676.13   30.40 
   0   4   7  694.43   31.10 
   0   4   7  737.43   34.60 
   0   4   7  724.53   27.90 
   0   4   7  718.03   36.40 
   0   4  -7  722.83   27.20 
   0  -4  -7  700.03   33.90 
   0  -4   7  697.93   35.70 
   0  -4   7  714.73   29.20 
   0  -4   7  769.12   30.80 
   0  -4  -7  740.63   37.30 
   0  -4  -7  701.33   31.10 
   0  -4   7  712.63   28.70 
   0  -4  -7  714.43   28.00 
   0  -4   7  740.23   35.20 
   0  -4  -7  712.13   31.00 
   0   4   8   57.99   10.30 
   0   4   8   91.89   12.10 
   0   4  -8   87.89    8.40 
   0   4  -8   96.19   11.80 
   0  -4   8   68.29    9.50 
   0  -4  -8   73.59   11.60 
   0  -4  -8  108.89   10.10 
   0  -4   8   79.69    9.70 
   0  -4   8   63.49   10.20 
   0  -4  -8   98.49   11.70 
   0  -4  -8   75.69   10.50 
   0  -4  -8   84.19   11.40 
   0  -4   8   53.59   10.30 
   0   4   9  619.84   26.50 
   0   4  -9  621.74   29.50 
   0   4   9  635.84   34.70 
   0   4   9  636.74   30.50 
   0   4  -9  659.43   26.10 
   0  -4  -9  620.64   38.00 
   0  -4   9  615.14   28.20 
   0  -4  -9  636.84   26.90 
   0  -4   9  641.74   28.00 
   0  -4  -9  606.94   29.60 
   0  -4  -9  610.84   29.60 
   0  -4   9  645.54   35.70 
   0   4  10   15.70    9.50 
   0   4  10   18.00    9.10 
   0   4 -10   12.10    6.10 
   0   4 -10    2.80    8.90 
   0  -4 -10   24.60    7.80 
   0  -4  10   15.80    9.30 
   0  -4  10   24.50    8.30 
   0  -4 -10   20.80   10.30 
   0  -4 -10   11.20    8.40 
   0   4  11  259.67   25.60 
   0   4  11  289.97   21.50 
   0   4 -11  324.47   21.20 
   0  -4  11  310.07   19.50 
   0  -4 -11  323.07   21.10 
   0  -4 -11  303.37   30.00 
   0  -4 -11  288.27   17.60 
   0  -4  11  303.97   27.10 
   0   4  12   21.00   11.20 
   0   4 -12   21.10   10.50 
   0   4  12   11.70   10.70 
   0  -4  12   14.10    9.00 
   0  -4 -12   26.60   10.40 
   0  -4  12    6.90   10.30 
   0  -4 -12   10.60    7.90 
   0   4  13   88.09   16.10 
   0   4  13   73.79   15.50 
   0   4 -13  105.39   16.10 
   0  -4  13   70.19   15.10 
   0  -4 -13   79.79   14.30 
   0  -4 -13   90.59   13.20 
   0  -4  13   90.99   14.20 
   0   4 -14   19.70   11.30 
   0   4  14    5.50   11.70 
   0   4  14   11.60   12.00 
   0  -4 -14   21.80   12.00 
   0  -4  14   19.00   11.70 
   0  -4 -14   -3.40   10.00 
   0  -4  14   14.10   12.30 
   0   4  15   85.29   17.10 
   0   4  15   99.69   19.10 
   0   4 -15  122.09   18.60 
   0  -4 -15   98.99   15.50 
   0  -4  15   58.79   17.00 
   0  -4  15  119.79   17.80 
   0   4  16   17.70   15.20 
   0   4 -16   30.90   13.70 
   0   4  16   32.40   15.80 
   0  -4 -16   36.30   12.10 
   0  -4  16   12.10   11.60 
   0  -4  16    2.10   12.80 
   0   4  17   40.10   16.00 
   0   4 -17   24.50   14.70 
   0   4  17   16.10   15.50 
   0  -4  17   70.99   17.00 
   0  -4 -17   43.50   13.10 
   0  -4  17   32.70   17.00 
   0   4  18  -18.10   16.20 
   0   4  18    9.50   14.30 
   0   4 -18    9.40   13.70 
   0  -4  18   17.00   13.40 
   0  -4  18   -0.70   14.10 
   0  -4 -18    7.00   13.00 
   0   4  19   41.30   17.20 
   0   4  19    1.40   16.40 
   0   4 -19   65.19   19.50 
   0  -4  19   29.40   18.20 
   0  -4 -19   25.10   13.50 
   0  -4  19   30.40   17.20 
   0   4 -20    7.00   14.10 
   0   4  20  -14.70   16.90 
   0   4  20  -13.60   15.30 
   0  -4  20    8.20   18.30 
   0  -4 -20   15.50   13.50 
   0  -4  20   14.90   14.50 
   0   6   0 2632.24   86.19 
   0   6   0 2601.64   89.99 
   0   6   0 2681.33   86.19 
   0   6   0 2678.73   86.09 
   0   6   0 2639.14   88.79 
   0  -6   0 2683.03   86.99 
   0  -6   0 2437.36   88.69 
   0  -6   0 2583.54   86.69 
   0  -6   0 2675.83   86.09 
   0  -6   0 2657.03   86.69 
   0  -6   0 2572.84   89.69 
   0  -6   0 2598.04   86.79 
   0   6  -1 1068.09   39.20 
   0   6  -1 1019.00   35.60 
   0   6  -1 1018.70   33.50 
   0   6   1  942.91   38.40 
   0   6   1  989.30   36.00 
   0   6   1 1008.60   39.00 
   0   6  -1 1033.10   33.50 
   0   6   1 1001.60   35.80 
   0   6   1 1006.80   33.70 
   0   6   1 1016.90   35.90 
   0  -6  -1  981.10   38.60 
   0  -6  -1 1022.00   39.30 
   0  -6  -1 1068.39   36.80 
   0  -6  -1  964.10   36.20 
   0  -6   1 1015.60   35.50 
   0  -6  -1  969.70   33.70 
   0  -6   1 1052.99   34.70 
   0  -6   1 1042.80   35.10 
   0  -6   1 1022.90   34.70 
   0  -6   1 1118.89   37.40 
   0  -6  -1  973.60   36.20 
   0  -6  -1 1012.00   36.10 
   0  -6  -1 1000.20   39.00 
   0   6   2  965.40   34.50 
   0   6   2  949.60   34.60 
   0   6   2  890.61   38.00 
   0   6   2  928.61   37.30 
   0   6  -2  932.11   37.20 
   0   6  -2  954.70   34.30 
   0   6  -2  994.50   32.00 
   0   6   2  944.81   34.50 
   0   6   2  939.61   37.20 
   0  -6  -2  987.70   38.70 
   0  -6  -2  950.00   34.90 
   0  -6  -2  923.31   34.70 
   0  -6   2  934.41   34.10 
   0  -6   2  930.21   32.50 
   0  -6   2  963.20   32.10 
   0  -6  -2  924.31   36.70 
   0   6   3  180.08   16.10 
   0   6   3  187.88   11.80 
   0   6  -3  165.78   14.20 
   0   6   3  183.88   15.60 
   0   6   3  185.38   12.00 
   0   6  -3  186.18   11.70 
   0   6  -3  197.38    8.00 
   0  -6  -3  183.98   13.60 
   0  -6   3  186.58    8.60 
   0  -6   3  210.98    9.30 
   0  -6  -3  184.68   12.30 
   0  -6   3  198.08   11.50 
   0  -6  -3  181.88   16.70 
   0  -6  -3  170.08   11.90 
   0   6   4  306.77   20.10 
   0   6  -4  266.27   15.10 
   0   6   4  275.07   15.70 
   0   6   4  297.97   18.30 
   0   6   4  270.07   14.80 
   0  -6   4  295.57   12.60 
   0  -6  -4  269.47   10.60 
   0  -6  -4  275.37   20.80 
   0  -6  -4  283.57   15.60 
   0  -6  -4  297.97   17.10 
   0  -6   4  276.57   11.80 
   0  -6   4  267.77   14.80 
   0  -6  -4  275.37   15.80 
   0   6   5   76.99   10.10 
   0   6   5   76.69    9.70 
   0   6  -5   83.89    6.10 
   0   6   5   56.59    9.60 
   0   6   5   65.99    9.30 
   0   6  -5   89.09   10.20 
   0  -6   5  101.79   12.30 
   0  -6   5   93.59    7.80 
   0  -6   5  104.49   10.50 
   0  -6  -5   69.39    9.40 
   0  -6  -5   98.19   10.90 
   0  -6  -5   54.29   10.10 
   0  -6  -5   59.09    8.10 
   0  -6  -5   73.99    5.80 
   0  -6   5   82.49    7.00 
   0   6   6  320.77   22.10 
   0   6  -6  339.37   14.50 
   0   6   6  336.87   19.40 
   0   6  -6  330.97   18.60 
   0   6   6  356.16   19.00 
   0   6   6  347.77   25.40 
   0  -6   6  324.67   18.10 
   0  -6  -6  343.07   19.10 
   0  -6   6  324.67   15.70 
   0  -6  -6  347.87   14.50 
   0  -6  -6  342.07   19.40 
   0  -6  -6  371.86   21.80 
   0  -6  -6  361.46   25.90 
   0  -6   6  328.17   15.60 
   0   6  -7  209.98   15.20 
   0   6   7  221.68   19.40 
   0   6   7  209.88   16.00 
   0  -6  -7  181.38   14.90 
   0  -6   7  195.78   12.60 
   0  -6   7  216.98   12.40 
   0  -6  -7  188.78   11.00 
   0  -6  -7  197.48   15.60 
   0  -6  -7  193.48   22.10 
   0  -6  -7  217.38   17.10 
   0  -6   7  204.48   18.70 
   0   6  -8  224.18   16.80 
   0   6   8  248.48   17.90 
   0   6   8  254.67   22.70 
   0  -6  -8  244.18   17.20 
   0  -6  -8  244.88   17.50 
   0  -6   8  231.28   14.80 
   0  -6  -8  252.07   13.20 
   0  -6   8  270.17   22.60 
   0  -6  -8  236.58   19.00 
   0  -6   8  276.77   14.80 
   0  -6   8  260.47   21.60 
   0  -6  -8  225.78   24.40 
   0   6   9  291.57   19.80 
   0   6  -9  248.58   18.30 
   0   6   9  255.17   22.70 
   0  -6  -9  263.77   18.80 
   0  -6   9  269.27   24.10 
   0  -6  -9  257.47   18.20 
   0  -6  -9  249.68   14.30 
   0  -6  -9  279.77   27.00 
   0  -6   9  271.07   16.10 
   0  -6   9  268.47   16.60 
   0   6  10  359.96   23.40 
   0   6 -10  387.46   22.90 
   0   6  10  343.77   27.10 
   0  -6  10  367.86   27.80 
   0  -6  10  349.17   20.30 
   0  -6 -10  364.86   29.40 
   0  -6 -10  353.26   18.30 
   0  -6 -10  385.06   23.20 
   0   6  11   12.80    9.90 
   0   6 -11   18.30   10.60 
   0   6  11    4.50   10.10 
   0  -6 -11    1.40    9.80 
   0  -6 -11   27.20   10.50 
   0  -6  11   12.20   10.00 
   0  -6  11   37.00    9.80 
   0  -6 -11   25.90    7.80 
   0   6  12  128.89   18.30 
   0   6  12  147.69   18.00 
   0   6 -12  184.78   19.70 
   0  -6 -12  137.49   13.90 
   0  -6  12   79.19   14.20 
   0  -6 -12  142.49   17.30 
   0  -6 -12  106.89   18.10 
   0  -6  12  128.49   14.50 
   0   6  13   23.10   12.80 
   0   6  13   32.40   14.30 
   0   6 -13   38.10   13.50 
   0  -6 -13   14.70   12.50 
   0  -6  13   25.30   11.10 
   0  -6 -13   30.30   10.10 
   0  -6  13   35.70   13.60 
   0  -6 -13   23.10   11.50 
   0   6  14   56.69   16.70 
   0   6 -14   80.39   16.20 
   0   6  14  109.59   18.00 
   0  -6  14   63.09   14.10 
   0  -6 -14   72.19   13.10 
   0  -6 -14   66.79   15.20 
   0  -6  14   55.09   15.90 
   0  -6 -14   70.49   15.90 
   0   6  15   10.10   13.40 
   0   6 -15   -1.10   12.30 
   0   6  15   -7.30   12.70 
   0  -6  15   11.40   13.30 
   0  -6 -15   -1.30    9.80 
   0  -6  15    0.40   11.00 
   0   6  16  103.19   19.40 
   0   6  16   68.09   18.60 
   0   6 -16  110.89   18.70 
   0  -6  16   98.39   16.20 
   0  -6  16   73.59   18.50 
   0  -6 -16  116.19   15.70 
   0   6  17   18.10   17.00 
   0   6  17   -6.00   14.30 
   0   6 -17   24.00   14.90 
   0  -6 -17   18.30   11.20 
   0  -6  17   28.90   13.20 
   0  -6  17   11.50   14.60 
   0   6  18    7.90   18.10 
   0   6 -18   19.90   15.10 
   0   6  18   17.00   15.70 
   0  -6 -18   15.40   12.30 
   0  -6  18   29.70   16.80 
   0  -6  18   14.20   13.90 
   0   6 -19   13.10   15.00 
   0   6  19   12.80   16.60 
   0   6  19   -9.10   16.70 
   0  -6  19   10.00   16.40 
   0  -6  19    0.00   13.80 
   0   6 -20   -2.80   14.20 
   0   8   0 1066.49   39.10 
   0   8   0 1007.80   35.50 
   0   8   0 1006.40   35.50 
   0   8   0 1037.70   35.50 
   0   8   0 1019.70   40.90 
   0  -8   0  973.90   36.40 
   0  -8   0 1001.10   35.50 
   0  -8   0 1045.00   36.50 
   0  -8   0 1053.79   39.60 
   0  -8   0 1003.40   36.50 
   0  -8   0 1027.70   36.90 
   0   8  -1   20.00    2.80 
   0   8   1   22.10    5.30 
   0   8   1   23.90    7.70 
   0   8   1   19.40    5.00 
   0   8   1   14.80    3.20 
   0   8  -1   18.10    2.70 
   0   8  -1   22.10    9.00 
   0   8   1   16.80    5.30 
   0   8  -1   12.40    5.10 
   0  -8  -1   21.90    6.20 
   0  -8   1   17.40    4.90 
   0  -8  -1   12.80    5.40 
   0  -8  -1   17.80    5.50 
   0  -8   1   12.60    4.20 
   0  -8  -1    0.60    4.50 
   0  -8  -1   17.10    5.60 
   0  -8   1   18.90    4.20 
   0  -8  -1   25.70    6.10 
   0  -8   1   13.30    4.70 
   0  -8  -1   16.50    3.30 
   0  -8  -1   17.60    5.30 
   0   8   2 2383.26   85.89 
   0   8   2 2368.76   86.09 
   0   8  -2 2431.86   82.19 
   0   8  -2 2394.06   86.09 
   0   8   2 2413.76   82.69 
   0   8   2 2441.66   82.49 
   0   8   2 2451.85   86.99 
   0   8   2 2376.76   82.39 
   0  -8  -2 2426.46   82.99 
   0  -8   2 2511.85   80.79 
   0  -8  -2 2576.14   86.09 
   0  -8  -2 2414.76   82.99 
   0  -8   2 2328.47   81.99 
   0  -8   2 2427.46   80.19 
   0  -8  -2 2334.47   83.09 
   0  -8   2 2465.05   83.59 
   0  -8  -2 2471.35   87.29 
   0   8   3   65.29    8.40 
   0   8   3   86.49    9.00 
   0   8   3   50.19    8.00 
   0   8   3  101.39   11.10 
   0   8  -3   86.69   12.20 
   0   8   3   75.19    8.70 
   0   8  -3   74.69    8.70 
   0   8   3   63.59    8.80 
   0  -8  -3   94.39   10.50 
   0  -8   3   67.29    5.90 
   0  -8   3   70.39    6.40 
   0  -8   3   84.29    8.50 
   0  -8  -3   55.59    7.80 
   0  -8  -3   73.19    8.70 
   0  -8  -3   54.79    8.70 
   0   8   4 1887.21   69.99 
   0   8  -4 1874.21   61.59 
   0   8  -4 1891.61   66.19 
   0   8   4 1895.31   66.79 
   0  -8  -4 1844.22   66.69 
   0  -8   4 1896.61   63.19 
   0  -8   4 1844.52   62.59 
   0  -8  -4 1832.12   66.79 
   0  -8  -4 1822.32   72.39 
   0  -8  -4 1905.71   69.19 
   0  -8   4 1867.41   65.99 
   0   8   5  317.57   17.40 
   0   8   5  314.37   18.10 
   0   8  -5  284.17   17.00 
   0   8   5  314.67   22.70 
   0   8   5  295.97   23.40 
   0   8  -5  288.37   11.90 
   0  -8   5  315.07   17.10 
   0  -8  -5  334.37   24.60 
   0  -8  -5  303.07   17.70 
   0  -8  -5  329.87   20.40 
   0  -8   5  260.77   18.40 
   0  -8   5  291.77   13.30 
   0  -8  -5  295.47   17.90 
   0  -8   5  300.37   13.70 
   0  -8  -5  286.17   10.90 
   0   8   6  886.81   43.10 
   0   8   6  867.21   40.60 
   0   8   6  891.01   36.90 
   0   8   6  946.11   37.70 
   0   8  -6  903.11   36.80 
   0  -8  -6  863.51   30.80 
   0  -8   6  896.11   32.80 
   0  -8   6  864.61   33.10 
   0  -8  -6  927.51   37.80 
   0  -8  -6  869.31   39.30 
   0  -8  -6  885.01   44.60 
   0  -8  -6  944.41   37.60 
   0   8   7   60.19   10.80 
   0   8  -7   51.59    9.40 
   0   8   7   40.90    9.90 
   0  -8  -7   72.49   11.60 
   0  -8  -7   33.60   10.40 
   0  -8   7   54.99    7.20 
   0  -8  -7   73.19   11.00 
   0  -8  -7   57.69    5.80 
   0  -8   7   68.19    7.80 
   0  -8  -7   53.79    9.20 
   0   8  -8  509.45   26.40 
   0   8   8  528.15   31.30 
   0   8   8  545.15   27.60 
   0  -8  -8  512.95   26.60 
   0  -8  -8  498.65   26.80 
   0  -8   8  509.85   22.90 
   0  -8   8  564.04   30.40 
   0  -8  -8  538.85   35.40 
   0  -8   8  519.85   22.60 
   0  -8  -8  493.55   33.10 
   0  -8  -8  484.05   20.60 
   0   8  -9   -3.30    8.20 
   0   8   9   18.10    9.70 
   0   8   9   21.40   10.50 
   0  -8   9    9.50    6.30 
   0  -8  -9    9.70    5.20 
   0  -8  -9    9.90    9.60 
   0  -8   9    7.80    8.60 
   0  -8  -9   19.00    9.50 
   0  -8  -9   22.10    9.40 
   0  -8   9   12.10    6.90 
   0   8  10  250.07   19.70 
   0   8 -10  197.38   18.00 
   0  -8 -10  193.18   17.80 
   0  -8 -10  174.58   17.80 
   0  -8  10  216.88   15.40 
   0  -8 -10  212.68   27.20 
   0  -8  10  202.38   23.70 
   0  -8 -10  201.68   12.90 
   0   8 -11   50.59   11.50 
   0   8  11   59.39   12.30 
   0   8  11   46.50   13.00 
   0  -8 -11   42.20    8.40 
   0  -8 -11   54.39   12.90 
   0  -8 -11   33.30   11.30 
   0  -8  11   48.90    9.80 
   0  -8  11   25.80   10.00 
   0   8  12   74.19   15.30 
   0   8  12   76.19   15.40 
   0   8 -12   70.99   14.80 
   0  -8 -12   77.09   11.00 
   0  -8 -12   45.60   14.70 
   0  -8  12   81.89   12.30 
   0  -8 -12   74.19   14.80 
   0  -8  12   54.39   14.30 
   0   8  13   18.50   13.40 
   0   8  13   32.80   13.60 
   0   8 -13   22.60   13.30 
   0  -8 -13   43.70   14.20 
   0  -8 -13   16.80   12.30 
   0  -8 -13   17.30   13.50 
   0  -8  13   30.00   10.90 
   0  -8 -13   38.20    9.30 
   0  -8  13   23.80   13.40 
   0   8  14   76.59   17.40 
   0   8  14  120.79   19.20 
   0   8 -14  133.29   19.60 
   0  -8 -14  148.59   20.00 
   0  -8 -14  141.79   14.70 
   0  -8  14   93.89   17.50 
   0  -8  14  140.19   16.50 
   0  -8 -14   75.89   18.50 
   0  -8 -14  116.19   18.50 
   0   8  15  -11.40   12.90 
   0   8 -15    4.70   13.30 
   0   8  15   17.40   13.70 
   0  -8  15   11.20   13.10 
   0  -8 -15   12.00    9.40 
   0  -8  15    2.00   11.10 
   0   8 -16   33.60   15.00 
   0   8  16   42.50   16.80 
   0   8  16    6.60   15.50 
   0  -8  16   38.80   13.80 
   0  -8  16   29.80   16.50 
   0  -8 -16   35.20   11.40 
   0   8 -17   22.90   14.90 
   0   8  17  -20.40   14.80 
   0   8  17   21.20   15.90 
   0  -8  17    1.50   14.90 
   0  -8  17    8.40   12.50 
   0  -8 -17   27.10   12.20 
   0   8  18  -18.40   18.30 
   0   8 -18   38.60   16.70 
   0   8  18   21.40   18.30 
   0  -8  18   13.40   15.60 
   0  -8  18   18.20   14.10 
   0   8  19  -32.00   16.50 
   0   8 -19   13.40   15.40 
   0  -8  19   24.20   17.60 
   0  -8  19    7.50   14.10 
   0  10   0  487.55   23.00 
   0  10   0  471.85   19.10 
   0  10   0  479.95   24.60 
   0  10   0  489.05   18.80 
   0  10   0  485.45   18.90 
   0 -10   0  475.45   19.00 
   0 -10   0  478.85   23.70 
   0 -10   0  488.45   20.30 
   0 -10   0  475.75   20.50 
   0 -10   0  501.75   26.00 
   0 -10   0  500.35   24.90 
   0 -10   0  480.55   20.40 
   0 -10   0  503.55   21.00 
   0  10  -1  286.27   14.10 
   0  10   1  301.87   12.20 
   0  10   1  310.77   14.40 
   0  10   1  314.47   14.30 
   0  10   1  294.17   18.10 
   0  10   1  284.87   19.40 
   0  10  -1  294.67   11.10 
   0  10  -1  265.37   17.90 
   0  10  -1  276.17   11.00 
   0 -10  -1  283.17   15.30 
   0 -10   1  292.27   17.30 
   0 -10  -1  309.07   16.00 
   0 -10   1  296.17   14.50 
   0 -10   1  289.77   13.80 
   0 -10   1  300.17   14.20 
   0 -10  -1  294.27   12.20 
   0 -10  -1  282.67   12.40 
   0 -10   1  249.78   16.50 
   0 -10  -1  327.07   19.30 
   0 -10  -1  290.47   15.00 
   0 -10  -1  306.27   19.40 
   0 -10  -1  336.57   19.70 
   0 -10  -1  308.27   15.30 
   0  10   2   43.60    7.20 
   0  10  -2   69.29   12.10 
   0  10   2   57.89    7.30 
   0  10  -2   78.79    8.80 
   0  10   2   59.29   11.70 
   0  10   2   60.99    8.10 
   0 -10  -2   54.99    8.80 
   0 -10  -2   39.90    7.50 
   0 -10   2   63.19    6.20 
   0 -10   2   63.39    6.70 
   0 -10  -2   47.50    8.20 
   0 -10   2   63.19    7.60 
   0 -10  -2   49.10    7.60 
   0 -10   2   43.20    6.20 
   0 -10  -2   46.40    8.50 
   0  10   3  435.66   20.30 
   0  10  -3  420.06   20.60 
   0  10   3  422.26   20.80 
   0  10   3  430.36   23.90 
   0  10   3  441.66   25.90 
   0  10   3  432.76   20.70 
   0  10  -3  433.46   24.80 
   0 -10   3  445.16   20.10 
   0 -10   3  443.96   21.70 
   0 -10  -3  471.75   22.00 
   0 -10   3  422.96   18.10 
   0 -10  -3  470.65   26.80 
   0 -10   3  439.96   17.50 
   0 -10  -3  441.46   24.30 
   0 -10  -3  446.56   21.70 
   0 -10  -3  433.76   21.20 
   0  10  -4  187.88   13.60 
   0  10   4  195.18   14.00 
   0  10   4  195.88   14.10 
   0  10   4  193.08   13.90 
   0  10  -4  203.48   17.60 
   0  10   4  214.18   19.70 
   0  10   4  208.18   18.60 
   0  10   4  227.38   19.50 
   0 -10   4  183.48   10.70 
   0 -10  -4  179.08   13.90 
   0 -10   4  194.38   10.10 
   0 -10   4  192.08   13.10 
   0 -10  -4  189.58   16.80 
   0 -10  -4  194.68   14.50 
   0 -10  -4  205.58   20.20 
   0 -10  -4  181.48   14.70 
   0  10  -5 1135.99   43.10 
   0  10   5 1083.89   38.60 
   0  10   5 1132.69   50.49 
   0  10   5 1075.59   42.80 
   0  10   5 1029.10   43.00 
   0  10   5 1160.48   48.10 
   0  10   5 1054.79   38.90 
   0  10   5 1153.18   48.70 
   0 -10   5 1089.89   43.20 
   0 -10  -5 1092.09   43.80 
   0 -10  -5 1075.39   44.10 
   0 -10  -5 1066.39   43.30 
   0 -10   5 1080.79   38.60 
   0 -10   5 1068.79   39.10 
   0 -10  -5 1079.29   46.30 
   0 -10  -5 1146.19   51.19 
   0  10   6   18.60    4.00 
   0  10  -6   45.10   10.10 
   0  10   6   33.30    9.10 
   0  10   6   19.80    8.80 
   0 -10   6   35.90    5.60 
   0 -10  -6   23.20    8.30 
   0 -10  -6   14.40    9.00 
   0 -10  -6   34.20    9.50 
   0 -10   6   35.10    6.10 
   0 -10  -6   22.70    7.60 
   0  10   7  447.16   24.80 
   0  10   7  439.86   30.00 
   0  10  -7  417.16   23.60 
   0 -10  -7  450.95   32.20 
   0 -10  -7  427.06   24.50 
   0 -10   7  457.15   19.90 
   0 -10  -7  451.55   24.30 
   0 -10   7  448.16   19.40 
   0 -10  -7  435.76   26.00 
   0  10   8   24.90   10.00 
   0  10  -8   34.40    9.50 
   0  10   8   28.40   11.00 
   0 -10   8   37.40    7.30 
   0 -10  -8   30.90   10.10 
   0 -10  -8   57.69   11.10 
   0 -10  -8   35.30    4.70 
   0 -10   8   44.90    7.30 
   0 -10  -8   18.80   10.00 
   0  10   9  332.37   27.20 
   0  10  -9  276.17   20.90 
   0  10   9  329.17   22.30 
   0 -10  -9  290.77   21.10 
   0 -10   9  280.07   16.20 
   0 -10  -9  308.77   30.10 
   0 -10   9  307.47   17.40 
   0 -10  -9  297.17   13.80 
   0 -10  -9  310.77   20.50 
   0  10  10  135.39   18.10 
   0  10  10  128.69   17.30 
   0  10 -10  165.48   18.40 
   0 -10 -10  132.69    9.90 
   0 -10 -10  138.09   17.40 
   0 -10  10  167.98   14.10 
   0 -10 -10  139.49   17.00 
   0 -10  10  105.49   16.40 
   0 -10 -10  186.68   23.30 
   0 -10 -10  173.38   19.20 
   0  10 -11  567.64   31.70 
   0  10  11  637.84   33.90 
   0  10  11  627.34   39.90 
   0 -10  11  615.34   41.00 
   0 -10 -11  585.54   33.40 
   0 -10 -11  593.04   43.70 
   0 -10 -11  545.25   24.40 
   0 -10  11  590.54   28.50 
   0 -10 -11  562.44   33.20 
   0  10  12   23.30   13.50 
   0  10 -12   25.30   12.30 
   0  10  12   28.20   13.20 
   0 -10 -12   30.10   13.80 
   0 -10  12   25.70   12.20 
   0 -10 -12   37.90    7.90 
   0 -10 -12   29.60   13.10 
   0 -10 -12   29.00   12.80 
   0 -10  12   22.90    9.40 
   0  10  13   90.69   17.30 
   0  10 -13   96.49   17.70 
   0  10  13   63.49   16.70 
   0 -10  13   40.50   15.00 
   0 -10 -13   64.09   17.10 
   0 -10 -13   64.59   16.20 
   0 -10  13   63.09   12.20 
   0 -10 -13   74.89   16.60 
   0 -10 -13   84.09   10.70 
   0  10 -14   51.59   15.30 
   0  10  14   37.40   15.40 
   0  10  14    6.50   14.20 
   0 -10  14   40.50   12.30 
   0 -10 -14   33.40    9.00 
   0 -10 -14   35.50   14.70 
   0 -10 -14   24.60   14.80 
   0 -10 -14   30.00   14.00 
   0 -10  14   34.30   14.60 
   0  10 -15   22.40   14.40 
   0  10  15   42.80   15.70 
   0  10  15   -7.00   15.70 
   0 -10  15   12.70   11.20 
   0 -10  15   29.80   15.30 
   0 -10 -15   23.30   10.50 
   0  10  16   38.20   15.70 
   0  10 -16   45.00   15.60 
   0  10  16   -6.60   17.50 
   0 -10  16   36.70   17.10 
   0 -10  16   42.50   13.20 
   0  10 -17   14.30   14.60 
   0  10  17  -25.30   17.80 
   0 -10  17    8.70   15.40 
   0 -10  17   24.00   12.90 
   0  10  18  -23.50   17.00 
   0  10 -18   11.30   15.50 
   0 -10  18   -8.60   14.90 
   0 -10  18    1.10   12.10 
   0  10 -19   18.70   17.20 
   0  10  19  -47.50   17.20 
   0 -10  19   15.50   18.30 
   0 -10  19   16.70   14.40 
   0  12   0   -4.10    4.20 
   0  12   0   -1.80    3.70 
   0  12   0    0.50    3.80 
   0  12   0    2.70    4.00 
   0  12   0   -2.40    9.20 
   0 -12   0   -1.40    5.00 
   0 -12   0   -4.80    4.90 
   0 -12   0    1.80    4.30 
   0 -12   0    3.90    5.80 
   0 -12   0   -3.40    4.80 
   0 -12   0    2.10    3.20 
   0 -12   0   -5.90    5.40 
   0  12  -1  560.64   19.80 
   0  12   1  590.14   23.50 
   0  12   1  594.64   30.60 
   0  12  -1  587.74   19.80 
   0  12   1  614.24   28.60 
   0  12  -1  631.44   31.10 
   0  12   1  596.04   23.30 
   0  12   1  547.15   21.60 
   0  12  -1  549.65   23.50 
   0 -12   1  576.94   23.70 
   0 -12  -1  571.04   24.90 
   0 -12  -1  587.04   29.90 
   0 -12  -1  612.64   30.90 
   0 -12   1  572.64   23.90 
   0 -12  -1  577.44   25.80 
   0 -12  -1  564.94   21.80 
   0 -12  -1  574.04   25.10 
   0 -12   1  592.54   27.60 
   0 -12   1  583.94   23.70 
   0 -12   1  580.04   24.30 
   0 -12  -1  574.24   25.40 
   0  12   2  105.79    9.30 
   0  12   2   90.79    9.50 
   0  12  -2   99.49   10.10 
   0  12   2   94.79   14.60 
   0  12  -2  106.09   15.40 
   0 -12   2   96.39   11.80 
   0 -12  -2   72.99   10.40 
   0 -12  -2   87.19   10.20 
   0 -12  -2   61.49    9.90 
   0 -12  -2   96.29   10.60 
   0 -12  -2   90.29   10.80 
   0 -12   2   84.39    8.40 
   0 -12   2  109.69   10.20 
   0 -12   2   93.39    8.30 
   0  12   3  224.08   17.90 
   0  12  -3  245.58   20.20 
   0  12  -3  249.08   14.60 
   0  12   3  220.08   14.20 
   0  12   3  223.98   19.10 
   0 -12  -3  265.67   22.70 
   0 -12  -3  250.17   15.60 
   0 -12   3  269.07   16.70 
   0 -12   3  243.38   12.20 
   0 -12   3  232.98   12.80 
   0 -12  -3  228.38   15.60 
   0 -12   3  231.18   14.10 
   0 -12  -3  230.98   19.20 
   0 -12  -3  234.78   16.00 
   0  12   4  236.78   16.30 
   0  12   4  255.37   21.70 
   0  12   4  238.68   18.60 
   0  12   4  255.97   15.80 
   0  12   4  251.47   21.30 
   0  12  -4  235.88   20.10 
   0  12   4  221.08   16.10 
   0  12  -4  210.98   14.90 
   0 -12   4  228.48   11.90 
   0 -12  -4  237.88   17.30 
   0 -12  -4  246.48   16.20 
   0 -12   4  232.58   14.80 
   0 -12   4  239.08   12.70 
   0 -12  -4  223.28   17.70 
   0 -12   4  229.88   16.30 
   0 -12  -4  243.68   22.10 
   0 -12  -4  225.38   20.30 
   0  12  -5   38.50    9.30 
   0  12   5   43.30    8.60 
   0  12   5   22.10    8.50 
   0  12   5   40.00    9.80 
   0  12   5   46.40   10.30 
   0  12   5   33.90   12.80 
   0  12  -5   55.19   13.80 
   0 -12   5   48.10    6.10 
   0 -12  -5   42.20    9.50 
   0 -12   5   33.40    6.20 
   0 -12  -5   30.10    9.30 
   0 -12  -5   24.80    9.20 
   0 -12  -5   11.30    8.40 
   0 -12  -5   51.69   10.50 
   0  12   6  101.99   17.20 
   0  12  -6  113.59   13.70 
   0  12   6  120.49   13.50 
   0  12   6  110.49    7.00 
   0  12   6   98.99   13.80 
   0  12   6   99.39    8.20 
   0  12   6  111.99   13.20 
   0 -12   6  111.99    8.90 
   0 -12  -6   80.59   13.40 
   0 -12  -6   83.99   13.40 
   0 -12  -6  110.49   13.90 
   0 -12   6  104.89    8.90 
   0 -12  -6  140.39   15.30 
   0 -12  -6  137.09   14.30 
   0  12   7  107.09   14.60 
   0  12   7  151.68   12.10 
   0  12   7  134.79   10.60 
   0  12   7  148.09   15.70 
   0  12  -7  156.18   16.40 
   0 -12  -7  148.69   16.60 
   0 -12  -7  129.19   15.00 
   0 -12  -7   85.59   14.40 
   0 -12  -7  139.29   15.90 
   0 -12   7  136.19   10.40 
   0 -12   7  154.88   10.60 
   0  12   8   10.90    4.60 
   0  12   8    6.00    9.40 
   0  12  -8    8.70   10.10 
   0  12   8    7.40    9.60 
   0 -12  -8   27.60   10.00 
   0 -12  -8   14.20   10.10 
   0 -12  -8    5.40    9.70 
   0 -12   8    5.20    5.50 
   0 -12  -8   15.00   10.60 
   0 -12   8   12.50    6.10 
   0  12   9  234.08   20.30 
   0  12   9  235.78   27.70 
   0  12   9  239.88   17.80 
   0  12  -9  208.18   18.80 
   0 -12   9  202.98   14.10 
   0 -12  -9  259.47   29.10 
   0 -12  -9  252.17   21.00 
   0 -12   9  223.58   15.00 
   0 -12  -9  218.88   19.50 
   0 -12  -9  195.68   20.70 
   0  12  10   75.79   16.60 
   0  12 -10   92.59   15.80 
   0  12  10   93.99   15.60 
   0 -12 -10   96.19   15.50 
   0 -12 -10   96.19   16.10 
   0 -12 -10   66.99   15.50 
   0 -12 -10   83.09   15.70 
   0 -12  10  108.89   11.80 
   0  12  11  263.77   31.70 
   0  12  11  175.88   20.70 
   0  12 -11  227.88   21.00 
   0  12  11  240.58   29.20 
   0 -12  11  215.38   16.70 
   0 -12 -11  277.37   23.50 
   0 -12 -11  245.98   22.60 
   0 -12 -11  239.48   28.10 
   0 -12  11  150.28   21.30 
   0  12 -12   97.99   16.80 
   0  12  12   62.69   17.50 
   0  12  12   83.59   16.20 
   0 -12  12   63.19   15.40 
   0 -12 -12   80.39   16.80 
   0 -12 -12   91.79    9.00 
   0 -12  12  103.29   13.00 
   0 -12 -12   61.39   16.80 
   0 -12 -12  106.19   17.80 
   0  12  13   56.19   18.10 
   0  12  13  108.09   18.60 
   0  12 -13  122.69   18.70 
   0 -12 -13   93.49   18.10 
   0 -12  13  108.89   14.30 
   0 -12 -13   73.29   18.10 
   0 -12  13   86.89   18.40 
   0 -12 -13  112.19   19.50 
   0  12  14   25.50   14.00 
   0  12 -14   23.60   14.20 
   0  12  14   -5.80   14.40 
   0 -12  14   34.00   11.20 
   0 -12  14    5.80   13.00 
   0 -12 -14   15.30   13.80 
   0 -12 -14   21.70   14.00 
   0  12 -15   50.79   16.10 
   0  12  15    2.20   18.10 
   0 -12  15   41.20   16.70 
   0 -12 -15   49.50   18.30 
   0 -12  15   55.59   13.40 
   0  12 -16   18.40   14.40 
   0  12  16  -25.40   15.10 
   0 -12  16   15.60   11.50 
   0 -12  16   26.90   16.00 
   0  12  17  -12.40   17.30 
   0  12 -17   40.20   14.60 
   0 -12  17   23.30   13.10 
   0 -12  17   23.90   17.50 
   0  12 -18   38.90   15.50 
   0  12  18  -40.90   17.20 
   0 -12  18    5.70   17.00 
   0 -12  18   19.60   13.10 
   0  14   0  347.87   14.80 
   0  14   0  347.27   14.70 
   0  14   0  353.16   16.00 
   0  14   0  342.57   24.30 
   0 -14   0  337.57   18.10 
   0 -14   0  348.97   18.60 
   0 -14   0  363.96   18.30 
   0 -14   0  351.56   18.00 
   0 -14   0  360.26   22.50 
   0  14  -1   -8.50    9.70 
   0  14  -1   10.60    6.00 
   0  14   1   16.20    4.50 
   0  14   1    5.00    4.30 
   0  14   1   12.60   11.20 
   0  14   1   12.70    5.60 
   0  14   1   11.00    5.20 
   0 -14   1    5.40    4.10 
   0 -14  -1    6.40    6.40 
   0 -14   1    4.80    5.40 
   0 -14   1   -0.40    5.30 
   0 -14   1    4.80    5.30 
   0 -14  -1    5.00    1.90 
   0 -14  -1   10.20    5.80 
   0 -14   1   12.50    5.60 
   0 -14  -1    6.70    2.40 
   0 -14  -1    9.90    6.60 
   0 -14   1    8.90    6.00 
   0  14  -2  364.96   25.40 
   0  14   2  349.87   17.70 
   0  14   2  353.56   23.40 
   0  14   2  347.47   24.70 
   0  14  -2  357.66   18.30 
   0  14   2  353.96   18.00 
   0 -14  -2  353.16   19.90 
   0 -14  -2  349.77   19.20 
   0 -14   2  365.36   17.90 
   0 -14  -2  361.36   20.10 
   0 -14   2  369.56   21.50 
   0 -14   2  365.96   17.90 
   0 -14   2  372.86   17.40 
   0 -14  -2  347.97   25.30 
   0  14  -3   95.19   11.00 
   0  14   3   66.29   10.80 
   0  14   3   87.89   10.40 
   0  14   3   87.69   15.70 
   0  14  -3   87.29   14.80 
   0 -14  -3  118.89   12.90 
   0 -14   3   95.09    9.20 
   0 -14  -3   85.19   11.30 
   0 -14  -3   91.89   11.80 
   0 -14   3  104.19    9.00 
   0 -14  -3   62.49   10.70 
   0 -14   3   96.89   11.00 
   0 -14   3   64.99    8.40 
   0  14   4  761.62   39.30 
   0  14   4  769.42   33.30 
   0  14  -4  755.02   39.10 
   0  14  -4  800.92   33.50 
   0  14   4  720.43   32.20 
   0 -14  -4  731.33   34.30 
   0 -14  -4  769.92   34.20 
   0 -14  -4  806.62   42.40 
   0 -14   4  767.72   29.70 
   0 -14   4  814.12   30.60 
   0 -14  -4  773.22   34.80 
   0 -14   4  810.72   34.90 
   0  14  -5   -3.50    7.70 
   0  14   5  -10.50    7.50 
   0  14   5   -4.00    8.10 
   0  14  -5   -3.90   10.70 
   0  14   5   -6.60   11.20 
   0  14   5    2.90    8.10 
   0 -14  -5   -3.70    7.70 
   0 -14   5    2.90    4.70 
   0 -14   5   -0.70    5.10 
   0 -14   5   -2.20    4.70 
   0 -14  -5   -3.60    7.90 
   0 -14  -5    4.80    8.30 
   0 -14  -5   -1.00    8.50 
   0  14   6  292.97   25.40 
   0  14   6  354.96   21.10 
   0  14   6  336.87   27.60 
   0  14  -6  302.97   19.80 
   0  14   6  315.17   20.30 
   0 -14  -6  331.87   22.10 
   0 -14  -6  298.77   21.10 
   0 -14   6  315.17   15.40 
   0 -14  -6  306.57   20.70 
   0 -14  -6  292.37   28.00 
   0 -14   6  301.97   20.80 
   0 -14   6  281.87   15.60 
   0  14   7   20.10   10.30 
   0  14   7    7.10   10.30 
   0  14  -7   -1.50    9.10 
   0  14   7   16.30   14.10 
   0  14   7   -5.50    8.20 
   0 -14   7   21.30    6.00 
   0 -14   7   13.30    5.90 
   0 -14  -7   15.00    9.90 
   0 -14  -7    6.40   10.10 
   0 -14  -7    5.00    8.20 
   0 -14  -7    2.80    9.60 
   0  14   8  195.68   23.20 
   0  14   8  131.59   16.60 
   0  14   8  159.98   12.40 
   0  14   8  170.28   18.20 
   0  14   8  161.98   10.50 
   0  14   8  122.89   17.00 
   0  14  -8  178.58   18.30 
   0 -14  -8  125.49   18.20 
   0 -14   8  159.18   12.40 
   0 -14  -8  161.48   17.90 
   0 -14  -8  154.28   18.40 
   0 -14   8  152.88   11.70 
   0 -14  -8  158.18   18.40 
   0  14   9   14.00    4.20 
   0  14  -9    9.50   11.30 
   0  14   9   12.50   14.60 
   0  14   9   -0.90   11.80 
   0  14   9   11.70   11.50 
   0  14   9   -0.20    4.80 
   0  14   9   16.40   11.20 
   0 -14  -9   10.40   11.10 
   0 -14  -9   14.50   12.10 
   0 -14  -9   22.50   12.10 
   0 -14  -9   23.40   10.90 
   0 -14   9   15.50    7.20 
   0  14  10   94.89   12.80 
   0  14  10   66.59   16.70 
   0  14 -10   79.19   15.50 
   0  14  10   78.99   15.30 
   0 -14 -10   48.40   15.30 
   0 -14  10   81.29   10.90 
   0 -14 -10   91.69   16.90 
   0 -14 -10   68.69   15.90 
   0  14  11   28.20   12.90 
   0  14 -11   34.70   13.70 
   0  14  11    3.60   13.70 
   0  14  11   22.30    6.10 
   0 -14 -11   27.90   14.50 
   0 -14 -11   37.50   13.70 
   0 -14 -11   43.20   14.30 
   0 -14  11   33.90    9.10 
   0  14  12  285.77   31.40 
   0  14 -12  222.78   20.30 
   0  14  12  270.47   32.10 
   0  14  12  262.47   22.00 
   0 -14  12  290.27   33.00 
   0 -14 -12  255.77   24.80 
   0 -14  12  249.28   18.40 
   0 -14 -12  181.88   25.30 
   0 -14 -12  292.87   26.20 
   0  14 -13   40.70   15.00 
   0  14  13    7.80   14.60 
   0 -14 -13   29.90   15.20 
   0 -14  13   37.90   10.80 
   0 -14  13   14.10   13.80 
   0 -14 -13   19.50   14.40 
   0  14  14   63.89   18.90 
   0  14 -14  113.19   20.00 
   0 -14  14  101.59   14.30 
   0 -14  14   66.99   18.70 
   0 -14 -14   94.99   20.60 
   0 -14 -14   87.99   22.60 
   0  14  15  -21.90   16.50 
   0  14 -15    9.20   14.50 
   0 -14  15   12.80   14.80 
   0 -14 -15   13.60   14.00 
   0 -14  15    3.70    9.80 
   0  14 -16   35.70   14.30 
   0  14  16  -25.80   15.80 
   0 -14  16   18.70   11.80 
   0 -14  16   29.10   17.50 
   0  14 -17    4.00   14.40 
   0  14  17  -43.40   17.20 
   0 -14  17    4.70   11.80 
   0 -14  17  -14.50   14.20 
   0  16   0  444.96   28.70 
   0  16   0  411.66   16.30 
   0  16   0  403.06   16.30 
   0  16   0  401.66   18.40 
   0  16   0  409.16   23.90 
   0 -16   0  416.46   26.10 
   0 -16   0  412.16   21.60 
   0 -16   0  414.16   21.20 
   0 -16   0  413.86   20.70 
   0  16   1  216.48   17.90 
   0  16   1  197.68   21.40 
   0  16  -1  205.78   13.30 
   0  16  -1  203.98   19.10 
   0  16   1  224.78   12.20 
   0  16   1  213.88   12.20 
   0 -16   1  232.18   14.50 
   0 -16  -1  191.38    9.30 
   0 -16  -1  225.58   16.40 
   0 -16  -1  205.88    9.20 
   0 -16   1  191.38   16.10 
   0 -16   1  200.98   14.30 
   0 -16   1  220.58   18.90 
   0 -16  -1  184.58   20.20 
   0 -16  -1  207.08   15.40 
   0  16  -2  352.26   18.40 
   0  16   2  332.97   17.20 
   0  16   2  328.77   17.40 
   0  16   2  319.87   23.40 
   0  16  -2  374.66   25.20 
   0  16   2  335.47   26.20 
   0 -16  -2  348.17   19.80 
   0 -16   2  350.16   22.60 
   0 -16   2  342.37   18.30 
   0 -16   2  348.27   17.60 
   0 -16  -2  327.57   26.20 
   0 -16  -2  352.26   21.20 
   0 -16   2  336.17   21.90 
   0 -16   2  325.57   18.20 
   0 -16   2  315.87   17.70 
   0  16  -3   67.69   10.70 
   0  16   3   58.39   15.50 
   0  16   3   64.09    9.30 
   0  16  -3   62.59   15.90 
   0  16   3   51.69    9.20 
   0 -16   3   49.99    8.40 
   0 -16  -3   68.49   10.90 
   0 -16  -3   76.29   12.50 
   0 -16   3   50.39    8.00 
   0 -16  -3   44.60   10.40 
   0 -16   3   49.30    8.20 
   0  16   4  361.76   20.00 
   0  16   4  324.27   19.90 
   0  16  -4  350.26   20.10 
   0  16  -4  354.86   27.50 
   0  16   4  345.57   27.10 
   0 -16   4  368.56   22.40 
   0 -16  -4  320.77   20.90 
   0 -16  -4  371.16   28.70 
   0 -16   4  358.86   17.50 
   0 -16  -4  335.17   21.80 
   0 -16  -4  346.77   22.00 
   0 -16   4  347.27   17.90 
   0  16  -5  154.88   21.40 
   0  16   5  126.29   20.10 
   0  16  -5  139.29   15.70 
   0  16   5  136.39   14.90 
   0 -16  -5  146.59   16.30 
   0 -16  -5  136.09   16.70 
   0 -16  -5  107.39   16.10 
   0 -16  -5  155.78   17.40 
   0 -16   5  123.59   10.50 
   0 -16   5  140.49   15.20 
   0 -16   5  121.99   11.20 
   0  16   6  133.39   15.00 
   0  16   6  135.49   15.50 
   0  16   6  133.29   21.50 
   0  16  -6  145.89   15.90 
   0  16   6   97.89   15.60 
   0 -16   6  147.49   16.20 
   0 -16   6  121.29   10.60 
   0 -16  -6  127.09   16.50 
   0 -16  -6  140.09   16.60 
   0 -16   6  138.99   11.50 
   0 -16  -6  153.78   16.70 
   0 -16  -6   95.99   15.80 
   0  16   7  157.78   23.30 
   0  16   7  167.48   17.60 
   0  16   7  142.09   16.70 
   0  16  -7  181.68   18.60 
   0  16   7  104.79   16.70 
   0 -16   7  145.99   16.90 
   0 -16  -7  106.79   17.20 
   0 -16  -7  164.98   17.90 
   0 -16   7  153.28   12.00 
   0 -16  -7  174.88   19.20 
   0 -16   7  150.48   11.50 
   0 -16  -7  177.18   19.00 
   0  16   8  124.89   16.90 
   0  16   8   79.99   16.20 
   0  16  -8  112.09   16.30 
   0  16   8  112.39   15.70 
   0  16   8  123.29   20.80 
   0 -16  -8  111.49   17.10 
   0 -16  -8  107.99   17.70 
   0 -16  -8   93.09   16.90 
   0 -16   8  116.49   11.40 
   0  16   9  101.89   18.70 
   0  16   9  109.79   16.90 
   0  16   9   95.69   21.60 
   0  16   9   72.59   15.60 
   0  16  -9  119.09   17.20 
   0 -16  -9  101.19   17.20 
   0 -16  -9   89.99   17.40 
   0 -16   9   93.19   10.60 
   0 -16  -9  107.09   17.40 
   0  16 -10   36.10   13.80 
   0  16  10   17.50   12.80 
   0  16  10   21.90   18.70 
   0  16  10   14.10   12.50 
   0 -16 -10   30.90   13.70 
   0 -16 -10   19.50   13.00 
   0 -16  10   34.30    8.80 
   0 -16 -10   15.20   13.10 
   0  16  11  114.29   18.70 
   0  16 -11  108.49   17.80 
   0  16  11   88.49   23.00 
   0  16  11   60.99   16.60 
   0 -16 -11  109.39   18.40 
   0 -16  11  100.79   12.20 
   0 -16 -11   61.89   16.90 
   0  16  12   79.59   17.30 
   0  16  12   44.00   17.70 
   0  16 -12   86.89   17.60 
   0  16  12   56.39   19.10 
   0 -16  12   65.99   17.30 
   0 -16  12   70.99   11.60 
   0 -16 -12   47.50   17.30 
   0 -16 -12   80.29   17.80 
   0  16  13  -21.00   13.60 
   0  16 -13    8.70   11.00 
   0 -16 -13   26.20   14.90 
   0 -16 -13   28.20   15.60 
   0 -16  13   12.90   13.70 
   0 -16  13   21.10    9.60 
   0  16 -14   40.70   17.00 
   0  16  14   14.70   15.80 
   0 -16  14   36.30   16.30 
   0 -16 -14   43.20   17.80 
   0 -16  14   43.30   11.30 
   0  16  15   -5.30   16.70 
   0  16 -15   26.00   16.10 
   0 -16 -15   30.10   15.90 
   0 -16  15    2.90   14.50 
   0 -16  15   16.50   10.60 
   0  16 -16   35.00   16.50 
   0  16  16  -24.00   17.10 
   0 -16  16   26.60   17.20 
   0 -16  16   35.90   12.30 
   0  16  17  -45.30   17.30 
   0  16 -17   19.70   19.60 
   0  18   0  277.37   20.10 
   0  18   0  304.67   15.20 
   0  18   0  265.77   25.60 
   0 -18   0  308.07   19.10 
   0 -18   0  286.27   15.50 
   0 -18   0  230.78   16.10 
   0 -18   0  300.67   18.40 
   0 -18   0  270.17   24.00 
   0  18   1  293.87   27.10 
   0  18  -1  342.07   17.40 
   0  18   1  313.37   22.50 
   0  18  -1  294.77   26.70 
   0  18   1  346.97   15.50 
   0  18   1  305.77   15.10 
   0 -18   1  321.27   19.20 
   0 -18  -1  327.37   27.00 
   0 -18   1  293.47   20.30 
   0 -18   1  316.47   24.10 
   0 -18  -1  321.87   20.10 
   0 -18   1  330.97   18.90 
   0 -18  -1  327.57   20.10 
   0  18   2   84.39    9.70 
   0  18  -2   83.39   19.20 
   0  18   2   82.79   18.70 
   0  18   2   96.69    9.80 
   0  18  -2   92.19   11.50 
   0 -18   2   84.59   10.40 
   0 -18   2   73.19   10.60 
   0 -18  -2   98.39   13.30 
   0 -18  -2   91.29   13.70 
   0 -18   2   50.89    8.20 
   0 -18  -2   62.79   12.30 
   0  18  -3  843.12   43.00 
   0  18  -3  757.62   33.90 
   0  18   3  705.03   40.60 
   0  18   3  792.32   33.00 
   0 -18  -3  794.32   36.20 
   0 -18   3  785.92   40.00 
   0 -18   3  767.32   32.90 
   0 -18  -3  806.52   44.30 
   0 -18  -3  811.42   36.90 
   0 -18   3  796.52   32.90 
   0 -18   3  784.72   37.40 
   0  18  -4   14.40    8.50 
   0  18   4    2.20   12.70 
   0  18  -4   -1.10   14.10 
   0  18   4   -0.40    7.40 
   0  18   4   -0.60    8.00 
   0 -18   4    2.10    6.10 
   0 -18   4    6.00    7.10 
   0 -18  -4    2.50    8.90 
   0 -18  -4   -0.90   10.30 
   0 -18  -4    2.00    9.10 
   0  18  -5  327.77   21.40 
   0  18  -5  360.06   30.00 
   0  18   5  316.17   21.30 
   0  18   5  356.26   30.20 
   0 -18  -5  354.96   33.50 
   0 -18  -5  328.67   24.00 
   0 -18   5  340.87   18.70 
   0 -18   5  377.56   23.60 
   0 -18  -5  384.66   24.20 
   0  18   6    7.50    9.80 
   0  18  -6   11.70   11.80 
   0  18   6   -5.90   13.60 
   0  18  -6    4.20    9.90 
   0 -18  -6    2.00   11.30 
   0 -18   6   19.20    7.30 
   0 -18   6    7.20    6.60 
   0 -18  -6    4.30   10.90 
   0  18   7  277.87   27.90 
   0  18  -7  311.77   22.10 
   0  18   7  303.47   23.10 
   0  18   7  252.77   30.20 
   0 -18   7  302.37   22.70 
   0 -18  -7  282.17   31.40 
   0 -18  -7  284.67   23.50 
   0 -18   7  262.57   16.40 
   0  18   8   25.50   11.50 
   0  18   8    9.40   12.40 
   0  18  -8   17.40   11.40 
   0  18   8    5.80   15.90 
   0 -18  -8   12.70   12.20 
   0 -18   8   10.00    7.00 
   0 -18   8   22.00    7.20 
   0 -18  -8    0.50   10.60 
   0  18  -9  175.48   20.30 
   0  18   9  161.58   27.10 
   0  18   9  154.78   19.70 
   0  18   9  130.99   18.80 
   0 -18   9  150.78   13.40 
   0 -18  -9  107.99   19.80 
   0 -18   9  160.98   19.70 
   0 -18  -9  171.38   22.20 
   0  18  10   -6.90   13.00 
   0  18  10   -0.10   11.30 
   0  18  10    7.10   17.90 
   0  18 -10    5.00   12.10 
   0 -18  10    1.40    7.20 
   0 -18 -10   -5.70   11.70 
   0 -18 -10   -3.30   11.60 
   0  18  11   76.39   16.80 
   0  18  11   60.39   16.10 
   0  18 -11   87.69   17.10 
   0  18  11   75.39   23.60 
   0 -18  11   73.59   11.30 
   0 -18 -11   53.89   16.60 
   0 -18 -11   42.70   15.80 
   0  18  12   -1.20   19.00 
   0  18 -12    4.20   14.50 
   0  18  12    0.30   14.30 
   0  18  12    1.20   13.10 
   0 -18 -12   17.70   13.70 
   0 -18  12   10.00    8.40 
   0 -18 -12  -11.40   14.40 
   0  18  13   98.69   20.10 
   0  18  13  107.59   27.50 
   0  18 -13  115.39   20.20 
   0  18  13   48.90   17.50 
   0 -18  13   96.79   20.30 
   0 -18  13   96.49   13.40 
   0 -18 -13   53.19   18.00 
   0 -18 -13   97.89   20.30 
   0  18  14  -11.80   19.00 
   0  18  14    9.10   16.90 
   0  18  14   13.10   14.70 
   0  18 -14   10.00   13.50 
   0 -18  14   -2.90    8.80 
   0 -18  14   -4.50   13.60 
   0 -18 -14    8.10   13.90 
   0  18  15    7.70   16.50 
   0  18 -15   43.30   18.00 
   0  18  15   50.29   18.60 
   0  18  15   41.40   24.30 
   0 -18  15   60.59   12.60 
   0 -18  15   31.30   17.50 
   0 -18 -15   47.90   17.80 
   0  18  16   -0.20   23.60 
   0  18 -16   35.00   17.40 
   0  18  16    5.80   16.20 
   0  20   0   89.49   20.20 
   0 -20   0   44.30   11.20 
   0 -20   0   71.99   11.90 
   0 -20   0   61.39   11.90 
   0 -20   0   64.99    8.50 
   0  20  -1    8.90   15.00 
   0  20   1   -1.50   14.40 
   0  20  -1    3.30    7.10 
   0  20   1   15.90    4.70 
   0 -20   1    2.60    8.20 
   0 -20   1    5.60    8.50 
   0 -20  -1   11.70    9.60 
   0 -20  -1   12.30    9.20 
   0 -20  -1   -0.60    8.70 
   0 -20   1    4.20    7.70 
   0  20   2  206.18   13.30 
   0  20   2  194.28   25.90 
   0  20  -2  228.88   27.60 
   0  20  -2  205.08   15.30 
   0 -20  -2  217.68   17.60 
   0 -20   2  150.38   20.40 
   0 -20   2  189.88   16.00 
   0 -20  -2  213.48   25.80 
   0 -20   2  209.28   16.10 
   0 -20  -2  186.78   18.40 
   0  20  -3  199.58   16.20 
   0  20   3  176.08   14.50 
   0  20  -3  213.88   27.50 
   0  20   3  164.98   25.10 
   0 -20  -3  217.08   26.90 
   0 -20   3  216.08   15.60 
   0 -20   3  158.18   18.90 
   0 -20  -3  203.58   19.90 
   0 -20   3  193.28   15.70 
   0  20   4  120.19   22.40 
   0  20  -4  109.69   14.50 
   0  20   4   97.19   12.70 
   0  20  -4  107.99   22.60 
   0 -20  -4   72.99   15.10 
   0 -20   4  124.99   12.30 
   0 -20   4  108.19   12.20 
   0 -20   4   68.79   10.50 
   0 -20  -4  103.29   16.10 
   0  20   5  134.99   23.70 
   0  20   5  112.29   14.40 
   0  20  -5  161.18   25.30 
   0  20  -5  164.48   17.40 
   0 -20  -5  107.39   17.70 
   0 -20  -5  147.89   19.10 
   0 -20   5   89.19   11.70 
   0 -20   5  119.39   12.30 
   0  20  -6  130.09   23.50 
   0  20   6  113.99   21.30 
   0  20  -6  112.39   16.20 
   0  20   6  106.49   15.00 
   0 -20   6   72.19   10.80 
   0 -20  -6  115.29   18.70 
   0 -20  -6   77.89   16.70 
   0 -20   6   98.49   11.50 
   0  20   7   91.29   15.10 
   0  20   7   90.69   22.10 
   0  20  -7  119.79   16.70 
   0 -20  -7   83.89   17.10 
   0 -20   7   58.39   15.80 
   0 -20   7  102.69   11.60 
   0 -20  -7   69.19   16.90 
   0  20  -8  106.89   16.90 
   0  20   8  115.89   22.10 
   0  20   8   90.79   17.00 
   0 -20   8  112.69   11.70 
   0 -20  -8  131.89   20.20 
   0 -20  -8   97.29   18.80 
   0  20  -9   73.99   15.30 
   0  20   9   64.19   16.10 
   0  20   9   63.79   21.70 
   0  20   9   48.00   14.70 
   0 -20  -9   37.60   14.50 
   0 -20  -9   50.59   15.50 
   0 -20   9   64.69   10.10 
   0  20  10   70.29   17.50 
   0  20  10   86.39   23.70 
   0  20  10   37.90   14.30 
   0  20 -10   46.80   15.10 
   0 -20  10   29.10    8.80 
   0 -20 -10   33.30   15.00 
   0 -20 -10   42.10   17.30 
   0  20  11   38.00   14.50 
   0  20  11   39.00   15.50 
   0  20  11   49.20   22.50 
   0  20 -11   75.29   17.50 
   0 -20  11   50.29   10.20 
   0 -20 -11   39.60   15.50 
   0 -20 -11   43.90   16.80 
   0  20  12   40.20   15.90 
   0  20  12   32.90   15.70 
   0  20  12   16.60   20.70 
   0  20 -12   25.80   15.10 
   0 -20 -12   24.40   17.00 
   0 -20  12   22.50    9.20 
   0 -20 -12   33.10   16.20 
   0  20  13   37.80   17.30 
   0  20  13   32.40   14.90 
   0  20 -13   54.89   16.80 
   0  20  13   37.90   23.20 
   0 -20  13   32.80   10.50 
   0 -20  13   49.99   17.50 
   0 -20 -13   44.40   18.00 
   0 -20 -13   52.09   18.40 
   0  20 -14   58.19   18.80 
   0  20  14   30.80   17.40 
   0  20  14   20.40   23.50 
   0 -20  14   35.50   17.30 
   0 -20 -14   61.49   18.70 
   0 -20  14   51.79   11.90 
   0  22   0  105.49   23.10 
   0 -22   0   94.19   14.30 
   0  22  -1   -7.90   15.50 
   0  22   1   -4.50   14.90 
   0 -22  -1   -6.60    9.70 
   0 -22   1    6.40    9.00 
   0 -22  -1   10.90   10.00 
   0 -22   1  -12.80    8.20 
   0  22   2  509.55   37.20 
   0  22  -2  472.95   36.90 
   0  22  -2  516.65   25.20 
   0 -22   2  437.96   30.80 
   0 -22   2  486.65   26.30 
   0 -22   2  509.95   26.80 
   0 -22  -2  480.85   35.90 
   0 -22  -2  478.15   29.10 
   0  22  -3   18.10   16.70 
   0  22   3    7.80    7.20 
   0  22  -3    1.60    8.60 
   0  22   3   -7.10   15.70 
   0 -22  -3   -9.80   10.10 
   0 -22   3   -0.10    8.30 
   0 -22   3    9.90    8.40 
   0 -22  -3    9.80   11.40 
   0  22  -4  179.88   18.00 
   0  22  -4  181.28   25.80 
   0  22   4  183.78   15.80 
   0  22   4  213.98   28.90 
   0 -22  -4  125.09   18.40 
   0 -22   4  177.68   15.60 
   0 -22   4  176.68   15.60 
   0 -22  -4  182.78   21.30 
   0  22   5    8.00    9.60 
   0  22   5   -0.10   12.30 
   0  22  -5    1.10   15.70 
   0  22  -5    0.40   10.50 
   0 -22  -5    4.90   11.30 
   0 -22   5   -9.10    7.00 
   0 -22  -5    8.00   11.50 
   0 -22   5    5.50    7.40 
   0  22  -6  115.29   24.50 
   0  22   6  109.69   24.40 
   0  22   6   70.49   13.10 
   0  22  -6  103.09   16.40 
   0 -22   6   84.49   11.30 
   0 -22   6  103.79   12.10 
   0 -22  -6   62.39   15.80 
   0 -22  -6   94.69   17.60 
   0  22   7   13.70   18.10 
   0  22  -7   23.10   13.00 
   0  22   7   12.70   11.20 
   0 -22   7   11.60    8.10 
   0 -22  -7    7.60   12.90 
   0 -22  -7   10.40   13.30 
   0  22  -8   67.79   15.00 
   0  22   8   68.09   14.00 
   0  22   8   76.99   22.60 
   0 -22  -8   69.09   18.20 
   0 -22   8   90.59   11.20 
   0 -22  -8   66.09   16.80 
   0  22   9   10.80   18.10 
   0  22   9    1.20   12.60 
   0  22  -9   -1.60   11.60 
   0 -22   9    3.40    7.40 
   0 -22  -9  -16.60   12.10 
   0 -22  -9    9.50   12.00 
   0  22 -10  100.79   18.30 
   0  22  10  120.39   27.00 
   0  22  10   78.29   17.90 
   0 -22  10   88.79   11.80 
   0 -22 -10   70.89   18.90 
   0 -22 -10   95.09   20.00 
   0  22 -11    8.80   13.30 
   0  22  11   10.90   20.40 
   0  22  11   12.20   13.80 
   0 -22 -11    7.30   16.60 
   0 -22 -11   13.10   13.60 
   0 -22  11   -4.10    7.50 
   0  22  12   53.59   24.60 
   0  22  12   27.30   17.10 
   0  22 -12   70.89   18.50 
   0 -22  12   34.50    9.80 
   0 -22 -12   38.50   17.90 
   0 -22 -12   50.99   20.00 
   0  22  13  -16.90   21.00 
   0  22  13  -17.90   14.60 
   0  22 -13   -8.60   13.30 
   0 -22 -13   13.60   17.80 
   0 -22  13   -2.20    8.50 
   0 -22 -13   34.90   15.80 
   0 -22  13   30.60   16.30 
   0  24   0   21.70   17.30 
   0 -24   0   26.60   11.20 
   0  24  -1  146.99   26.50 
   0  24   1  153.08   27.00 
   0 -24  -1  158.88   19.20 
   0 -24   1  176.08   18.30 
   0  24  -2  214.78   30.20 
   0  24   2  178.08   28.30 
   0 -24  -2  148.09   18.70 
   0 -24   2  179.68   17.70 
   0  24  -3  108.49   16.60 
   0  24  -3  128.39   25.30 
   0  24   3  110.49   24.40 
   0 -24  -3  121.19   17.70 
   0 -24   3  112.59   14.50 
   0 -24  -3   67.09   16.00 
   0  24   4   50.49   21.10 
   0  24  -4   57.69   21.50 
   0  24  -4   50.89   11.80 
   0 -24   4   49.60   10.70 
   0 -24  -4   20.10   12.80 
   0 -24  -4   46.70   14.10 
   0  24  -5  117.59   16.60 
   0  24   5  115.29   26.00 
   0  24  -5  152.78   27.50 
   0 -24  -5  112.09   19.40 
   0 -24  -5   90.49   17.60 
   0 -24   5  108.79   13.20 
   0  24   6   20.20   20.00 
   0  24  -6   26.60   20.10 
   0  24   6   29.40   11.60 
   0  24  -6   33.50   12.80 
   0 -24  -6   52.49   16.80 
   0 -24   6   29.60    9.80 
   0 -24  -6    8.80   12.10 
   0  24   7   88.29   25.10 
   0  24   7   90.59   15.40 
   0  24  -7   68.19   15.70 
   0 -24  -7   64.69   16.40 
   0 -24   7   73.79   11.30 
   0 -24  -7   83.69   19.30 
   0  24   8    0.50   11.50 
   0  24  -8    4.50   13.10 
   0  24   8    1.80   18.10 
   0 -24  -8    7.10   12.80 
   0 -24   8   17.90    8.30 
   0 -24  -8   17.30   14.80 
   0  24   9   45.10   14.50 
   0  24  -9   88.99   18.40 
   0  24   9   58.69   23.90 
   0 -24  -9   50.29   17.60 
   0 -24  -9   58.89   16.00 
   0 -24   9   76.19   10.80 
   0  24  10   -0.40   19.70 
   0  24  10   10.50   12.90 
   0  24 -10    9.40   14.10 
   0 -24 -10   16.80   14.70 
   0 -24 -10   18.70   17.10 
   0 -24  10   13.10    8.10 
   0  24  11   36.30   16.30 
   0  24  11   57.89   24.00 
   0  24 -11   33.30   16.20 
   0 -24 -11   55.29   16.50 
   0 -24  11   28.50    9.30 
   0 -24 -11   37.00   17.90 
   0  26   0   42.50   21.70 
   0 -26   0   41.90   13.40 
   0  26  -1  169.68   27.80 
   0  26   1  160.08   28.90 
   0 -26  -1  147.79   18.90 
   0 -26   1  172.98   18.90 
   0  26   2   28.30   19.80 
   0  26  -2  -25.00   16.80 
   0 -26   2   13.00   10.30 
   0 -26  -2   14.00   12.60 
   0  26  -3  160.48   29.50 
   0  26   3  198.88   30.60 
   0 -26   3  172.98   17.90 
   0 -26  -3  199.98   23.00 
   0  26   4   28.00   20.30 
   0  26  -4    2.20   18.70 
   0 -26   4   30.10   10.30 
   0 -26  -4   33.00   14.80 
   0  26  -5   70.29   24.10 
   0  26   5  110.29   26.50 
   0 -26   5   96.19   13.60 
   0 -26  -5   55.59   17.00 
   0  26   6   42.00   21.10 
   0 -26   6   21.60    9.50 
   0 -26  -6   19.50   14.30 
   0  26   7  142.59   28.60 
   0  26  -7  110.89   17.40 
   0 -26   7   85.79   12.50 
   0 -26  -7   94.39   20.10 
   0  26  -8    9.70   13.40 
   0  26   8   -5.50   19.80 
   0 -26  -8   22.70   15.70 
   0 -26   8    6.60    8.20 
   0  26   9  100.29   26.70 
   0  26  -9   83.49   18.40 
   0 -26   9   91.99   11.90 
   0 -26  -9   66.79   20.70 
   0  28   0  120.39   27.10 
   0 -28   0   94.59   16.70 
   0  28   1   25.70   20.40 
   0  28  -1   34.70   22.90 
   0 -28  -1   33.00   14.00 
   0 -28   1   14.90   12.40 
   0  28  -2   59.39   24.40 
   0  28   2   99.69   26.10 
   0 -28   2   74.99   14.50 
   0 -28  -2   89.19   17.70 
   0  28  -3   33.50   21.60 
   0  28   3   32.20   21.50 
   0 -28  -3   11.40   14.10 
   0 -28   3   26.30   11.90 
   0  28   4   78.29   25.20 
   0  28  -4   65.09   24.60 
   0 -28   4   48.90   12.00 
   0 -28  -4   55.49   17.10 
   0  28  -5   20.60   22.80 
   0  28   5   22.20   21.20 
   0 -28   5    1.80    9.70 
   0 -28  -5    9.60   15.10 
  -1   1  20   12.40   15.10 
  -1   1  20   -4.80   17.40 
   1   1 -20   33.20   15.10 
  -1  -1  20    0.80   17.20 
   1  -1 -20   11.00   14.80 
  -1  -1  20   32.70   17.70 
  -1   1  19  -11.30   16.30 
  -1   1  19    3.60   14.40 
   1   1 -19   43.60   17.10 
  -1  -1  19   10.00   17.60 
  -1  -1  19   -1.40   13.50 
   1  -1 -19   22.90   14.80 
   1   1 -18   13.00   12.40 
  -1   1  18    1.40   16.00 
  -1   1  18   18.60   14.60 
  -1  -1  18  -10.30   12.40 
   1  -1 -18    9.80   12.40 
  -1  -1  18   -0.70   15.50 
  -1   1  17   24.30   15.10 
   1   1 -17   24.80   13.50 
  -1   1  17   -7.80   14.30 
  -1  -1  17   -3.30   14.40 
  -1  -1  17    3.50   12.20 
   1  -1 -17    3.90   11.20 
  -1   1  16   33.70   14.90 
  -1   1  16    0.60   13.30 
   1   1 -16   31.00   13.60 
  -1  -1  16   31.70   14.90 
  -1  -1  16   15.20   13.90 
   1  -1 -16   31.80   13.00 
   1   1 -15  610.44   33.30 
  -1   1  15  612.84   34.90 
  -1   1  15  625.84   44.60 
  -1  -1  15  569.34   34.80 
   1  -1 -15  592.94   32.30 
  -1  -1  15  636.14   44.70 
  -1   1  14   -2.40   11.70 
   1   1 -14    2.20   10.30 
  -1   1  14   11.80   11.50 
  -1  -1  14   13.40   12.20 
  -1  -1  14   16.10   11.30 
   1  -1 -14   15.10   11.00 
   1   1 -13   93.59   13.70 
  -1   1  13   80.99   14.70 
   1   1 -13  123.09   15.90 
  -1   1  13   69.59   15.10 
  -1  -1  13   77.49   15.50 
   1  -1 -13  102.09   15.10 
   1  -1 -13   96.19   14.40 
  -1  -1  13  112.89   15.40 
  -1   1  12   49.20   13.00 
   1   1 -12   47.00   11.80 
  -1   1  12   61.89   12.30 
  -1  -1  12   35.10   12.00 
   1  -1 -12   74.29   12.40 
  -1  -1  12   60.79   12.10 
  -1   1  11  166.18   16.10 
   1   1 -11  188.78   15.90 
  -1   1  11  182.68   22.30 
   1  -1 -11  192.58   15.20 
  -1  -1  11  121.69   16.40 
  -1  -1  11  185.98   15.90 
   1   1 -10   49.30   10.40 
  -1   1  10   51.09   11.30 
  -1   1  10   59.09   10.90 
  -1  -1  10   42.00   10.90 
   1  -1 -10   58.69    9.80 
  -1  -1  10   59.59   10.30 
   1  -1 -10   67.99   11.40 
  -1   1   9  303.47   18.70 
  -1   1   9  271.87   23.20 
  -1   1   9  289.77   16.90 
   1   1  -9  300.67   18.20 
  -1  -1   9  294.67   17.90 
  -1  -1   9  315.87   24.20 
   1  -1  -9  307.57   17.50 
   1  -1  -9  300.47   17.30 
   1   1  -8   26.00    8.70 
  -1   1   8   46.70    8.00 
   1   1  -8   55.29    8.60 
  -1   1   8   43.60    9.30 
  -1   1   8   30.00    9.00 
   1   1  -8   50.99    9.40 
  -1   1   8   48.70    9.20 
  -1  -1   8   30.30    8.00 
  -1  -1   8   56.79    8.60 
   1  -1  -8   45.30    9.00 
   1  -1  -8   34.60    7.70 
  -1  -1   8   54.69    9.00 
  -1  -1   8   48.70    9.40 
   1  -1  -8   46.60    9.20 
  -1  -1   8   32.40    9.00 
   1  -1  -8   35.10    7.40 
  -1   1   7 1112.29   41.60 
   1   1  -7 1057.39   41.20 
   1   1  -7 1043.40   40.40 
  -1   1   7 1048.60   41.60 
   1   1  -7 1073.39   46.00 
  -1   1   7 1115.99   48.50 
  -1   1   7 1058.09   46.50 
  -1  -1   7 1127.59   47.20 
   1  -1  -7 1085.19   40.60 
  -1  -1   7 1085.49   47.80 
   1  -1  -7 1081.59   41.50 
  -1  -1   7 1084.89   41.00 
   1  -1  -7 1080.49   41.10 
  -1  -1   7 1108.29   40.90 
  -1  -1   7 1109.99   41.30 
   1  -1  -7 1096.29   46.10 
   1   1  -6   11.40    5.60 
  -1   1   6   10.00    6.20 
  -1   1   6   22.10    5.80 
   1   1  -6    9.70    6.60 
  -1   1   6    5.70    4.30 
  -1   1   6   19.60    6.80 
  -1   1   6   14.50    6.80 
   1   1  -6   14.40    5.90 
   1  -1  -6   13.30    6.00 
  -1  -1   6   19.20    6.60 
  -1  -1   6   12.10    6.60 
   1  -1  -6    9.40    5.80 
  -1  -1   6   14.40    6.20 
  -1  -1   6    4.10    4.80 
   1  -1  -6   21.00    6.30 
   1  -1  -6   16.30    6.20 
  -1  -1   6   11.70    5.70 
   1   1  -5  722.23   32.60 
  -1   1   5  771.72   30.00 
   1   1  -5  810.12   28.90 
  -1   1   5  747.43   33.70 
  -1   1   5  774.42   29.80 
   1   1  -5  778.92   29.70 
  -1   1   5  743.13   28.70 
  -1  -1   5  742.63   28.80 
   1  -1  -5  766.62   28.90 
  -1  -1   5  812.22   33.70 
   1  -1  -5  783.82   33.30 
  -1  -1   5  788.62   34.60 
  -1  -1   5  776.22   29.20 
   1  -1  -5  778.12   29.60 
   1  -1  -5  723.73   29.40 
  -1  -1   5  772.52   29.50 
   1   1  -4  794.02   29.60 
  -1   1   4  786.12   33.10 
  -1   1   4  785.52   29.80 
  -1   1   4  816.92   28.90 
  -1   1   4  780.52   29.70 
   1   1  -4  750.62   28.40 
  -1  -1   4  766.42   28.80 
   1  -1  -4  807.82   29.60 
  -1  -1   4  803.42   32.80 
  -1  -1   4  796.22   28.80 
  -1  -1   4  772.12   29.40 
   1  -1  -4  823.32   28.90 
   1  -1  -4  794.22   32.70 
   1  -1  -4  792.62   29.60 
  -1   1   3 3655.13  124.39 
  -1   1   3 3588.94  121.09 
   1   1  -3 3524.05  120.99 
   1   1  -3 3807.22  121.89 
  -1   1   3 3767.82  121.89 
  -1   1   3 3626.44  121.99 
   1  -1  -3 3693.83  121.19 
  -1  -1   3 3743.83  121.19 
  -1  -1   3 3799.92  121.89 
  -1  -1   3 3803.42  121.09 
  -1  -1   3 3767.52  124.59 
   1  -1  -3 3913.61  124.69 
   1  -1  -3 3550.14  121.79 
   1  -1  -3 3613.74  121.89 
  -1   1   2  397.86   17.30 
   1   1  -2  372.66   14.10 
  -1   1   2  330.37   15.10 
  -1   1   2  373.26   15.30 
   1   1  -2  403.76   15.00 
  -1   1   2  382.76   17.60 
  -1   1   2  401.66   14.50 
   1   1  -2  399.96   17.00 
   1  -1  -2  394.46   14.60 
  -1  -1   2  397.06   14.30 
  -1  -1   2  420.66   17.00 
  -1  -1   2  352.56   14.20 
   1  -1  -2  380.26   15.30 
  -1  -1   2  382.36   15.10 
   1  -1  -2  388.16   15.30 
  -1   1   1 1911.81   62.99 
  -1   1   1 1936.61   64.29 
   1   1  -1 1950.90   62.09 
  -1   1   1 1938.11   63.09 
  -1   1   1 1970.70   64.09 
   1   1  -1 1971.60   62.99 
   1   1  -1 1803.52   61.99 
   1   1  -1 1953.60   63.79 
  -1   1   1 1839.92   62.99 
  -1  -1   1 1940.01   63.09 
   1  -1  -1 1941.21   63.99 
  -1  -1   1 1888.31   63.69 
   1  -1  -1 2034.90   63.19 
   1  -1  -1 1848.92   62.99 
  -1  -1   1 1931.11   62.09 
  -1  -1   1 1792.62   62.09 
   1   1   0  907.31   28.60 
   1   1   0  932.71   29.20 
   1   1   0  868.91   28.70 
  -1   1   0  866.51   30.20 
   1  -1   0  904.91   29.00 
   1  -1   0  730.63   29.90 
   1  -1   0  863.51   29.20 
   1  -1   0  896.31   30.00 
  -1   1  -1 3989.00  127.99 
   1   1   1 3868.71  125.59 
   1   1   1 3847.91  125.79 
  -1   1  -1 3969.20  128.39 
   1   1   1 3904.21  125.89 
  -1   1  -1 3901.21  125.69 
  -1   1  -1 4064.39  125.79 
  -1  -1  -1 3898.81  125.89 
  -1  -1  -1 3762.52  125.79 
   1  -1   1 3777.62  125.69 
  -1  -1  -1 3826.42  127.39 
  -1  -1  -1 3987.50  127.59 
   1  -1   1 3886.61  127.09 
   1  -1   1 3534.05  125.59 
  -1   1  -2  173.08    8.60 
   1   1   2  175.38   11.20 
  -1   1  -2  170.28    9.00 
  -1   1  -2  183.98   11.00 
  -1   1  -2  185.28    8.60 
   1   1   2  183.78    9.40 
   1   1   2  190.28    9.40 
   1  -1   2  191.88    8.80 
  -1  -1  -2  186.58    9.40 
  -1  -1  -2  200.68   12.60 
  -1  -1  -2  182.78    9.30 
  -1  -1  -2  181.58    9.30 
   1  -1   2  187.48    8.70 
   1  -1   2  185.68   10.30 
  -1   1  -3   32.60    5.90 
  -1   1  -3   47.60    6.50 
  -1   1  -3   50.29    5.80 
   1   1   3   44.10    6.90 
   1   1   3   39.20    5.10 
  -1   1  -3   51.19    6.30 
   1   1   3   53.99    6.80 
  -1  -1  -3   42.80    6.30 
  -1  -1  -3   48.80    6.60 
  -1  -1  -3   53.89    5.70 
  -1  -1  -3   61.49    6.70 
   1  -1   3   50.29    5.90 
   1  -1   3   40.10    6.50 
  -1  -1  -3   37.20    5.20 
   1  -1   3   59.29    6.20 
  -1   1  -4  142.49    9.80 
  -1   1  -4  140.39   13.80 
   1   1   4  152.18   10.90 
   1   1   4  174.08   15.70 
  -1   1  -4  146.29    9.80 
   1   1   4  164.08   12.30 
  -1   1  -4  144.79    9.30 
  -1  -1  -4  150.98   10.80 
  -1  -1  -4  155.78   12.40 
   1  -1   4  158.78   10.40 
   1  -1   4  150.58   10.00 
   1  -1   4  155.58   13.00 
   1  -1   4  147.99   10.20 
  -1  -1  -4  160.28    9.60 
  -1  -1  -4  158.78   10.90 
   1  -1   4  166.78   14.30 
  -1  -1  -4  179.68   16.30 
   1   1   5  816.02   31.80 
   1   1   5  852.41   37.30 
  -1   1  -5  892.01   31.40 
  -1   1  -5  844.22   31.60 
  -1   1  -5  839.32   36.10 
  -1   1  -5  812.92   31.30 
   1   1   5  822.62   34.30 
   1   1   5  815.82   31.80 
  -1  -1  -5  796.92   34.00 
  -1  -1  -5  770.92   31.60 
  -1  -1  -5  806.02   31.90 
   1  -1   5  832.22   35.00 
   1  -1   5  814.12   31.30 
   1  -1   5  873.01   36.30 
   1  -1   5  791.12   31.50 
   1  -1   5  821.42   31.40 
  -1  -1  -5  828.42   37.20 
  -1  -1  -5  779.92   30.70 
  -1   1  -6   13.60    6.80 
  -1   1  -6   12.30    6.00 
   1   1   6   15.80    7.10 
   1   1   6   16.20    6.50 
  -1   1  -6   11.20    5.90 
  -1   1  -6    9.20    6.40 
   1   1   6    9.40    5.70 
   1   1   6    8.10    5.90 
   1  -1   6   17.60    6.50 
   1  -1   6   12.20    6.10 
  -1  -1  -6    9.90    5.60 
  -1  -1  -6   19.70    6.70 
  -1  -1  -6   13.10    6.90 
  -1  -1  -6   14.00    6.60 
   1  -1   6   13.50    5.40 
   1  -1   6   -3.10    4.20 
  -1  -1  -6    5.10    5.80 
   1  -1   6    8.90    6.40 
  -1   1  -7  317.97   17.30 
   1   1   7  327.97   18.50 
  -1   1  -7  353.96   18.10 
  -1   1  -7  339.27   17.50 
   1   1   7  314.47   24.50 
   1   1   7  347.67   21.90 
   1   1   7  341.07   18.40 
  -1   1  -7  336.37   23.60 
  -1  -1  -7  358.66   17.40 
  -1  -1  -7  354.46   18.20 
  -1  -1  -7  339.27   23.20 
   1  -1   7  339.07   18.50 
   1  -1   7  344.87   17.80 
  -1  -1  -7  343.07   18.50 
   1  -1   7  359.76   18.50 
   1  -1   7  357.86   24.20 
  -1  -1  -7  321.37   20.40 
   1  -1   7  343.07   22.20 
   1   1   8   90.69   14.60 
  -1   1  -8   77.89   11.80 
   1   1   8   93.19   11.60 
  -1   1  -8  109.99   11.10 
   1   1   8  164.78   13.60 
  -1   1  -8  120.49   11.30 
  -1   1  -8  126.89   10.60 
   1  -1   8  122.69   11.70 
   1  -1   8  122.59   11.60 
  -1  -1  -8  121.49   11.20 
  -1  -1  -8   90.39   12.70 
   1  -1   8   77.99   11.90 
  -1  -1  -8  130.29   12.00 
  -1  -1  -8  143.29   12.80 
   1  -1   8  132.49   12.20 
   1  -1   8   84.99   11.60 
   1   1   9  298.87   19.20 
  -1   1  -9  287.17   17.20 
   1   1   9  331.77   23.50 
  -1   1  -9  263.67   17.80 
  -1  -1  -9  308.17   18.60 
   1  -1   9  318.37   23.30 
   1  -1   9  290.87   18.40 
  -1  -1  -9  277.17   17.10 
  -1  -1  -9  294.97   25.90 
  -1   1 -10  167.48   15.10 
  -1   1 -10  175.48   14.40 
   1   1  10  183.08   16.40 
   1   1  10  181.98   20.20 
  -1  -1 -10  194.98   23.30 
   1  -1  10  189.68   20.60 
   1  -1  10  186.98   15.70 
  -1  -1 -10  202.18   15.90 
  -1  -1 -10  191.68   14.90 
  -1   1 -11  198.48   16.70 
   1   1  11  200.18   19.10 
   1   1  11  181.08   22.00 
  -1   1 -11  198.08   15.50 
  -1  -1 -11  208.48   17.00 
  -1  -1 -11  199.28   17.70 
   1  -1  11  192.08   22.30 
  -1  -1 -11  209.68   25.60 
   1  -1  11  206.48   17.40 
  -1   1 -12   32.10   11.10 
   1   1  12   34.60   11.10 
   1   1  12   40.70   11.60 
  -1   1 -12   35.60    9.40 
  -1  -1 -12   46.00   11.10 
   1  -1  12   34.50   12.00 
   1  -1  12   21.90   10.80 
  -1  -1 -12   36.40   10.40 
   1   1  13  169.98   19.20 
  -1   1 -13  225.18   18.50 
   1   1  13  133.39   18.10 
  -1   1 -13  181.88   17.20 
   1  -1  13  138.99   18.40 
   1  -1  13  160.88   18.40 
  -1  -1 -13  178.48   16.70 
  -1  -1 -13  157.78   17.10 
  -1   1 -14   22.40   10.90 
   1   1  14   22.40   12.10 
   1   1  14   16.60   12.70 
  -1   1 -14   39.10   12.00 
   1  -1  14   20.20   13.50 
  -1  -1 -14   23.50   11.30 
  -1  -1 -14   17.30   11.50 
   1  -1  14   12.90   11.60 
  -1   1 -15   47.80   12.60 
  -1   1 -15   39.70   13.20 
   1   1  15   61.69   16.40 
   1   1  15   31.80   15.50 
   1  -1  15   46.20   14.40 
   1  -1  15   26.40   13.80 
  -1  -1 -15   31.60   12.90 
  -1  -1 -15   46.40   12.80 
   1   1  16   98.39   18.30 
   1   1  16   50.59   16.40 
  -1   1 -16  115.59   18.30 
   1  -1  16   77.89   17.90 
  -1  -1 -16  108.99   16.60 
   1  -1  16   64.69   17.50 
  -1  -1 -16   96.89   15.40 
   1   1  17   43.30   15.80 
   1   1  17    3.70   14.80 
  -1   1 -17   61.69   15.60 
   1  -1  17    6.70   14.00 
   1  -1  17   38.70   15.70 
  -1  -1 -17   64.39   15.60 
  -1   1 -18   17.00   12.70 
   1   1  18   17.30   16.30 
   1   1  18   17.60   15.50 
  -1  -1 -18   16.20   13.40 
   1  -1  18    1.50   15.90 
   1  -1  18   21.80   16.50 
  -1   1 -19    7.50   13.30 
   1   1  19   -3.00   16.70 
   1   1  19  -10.00   16.00 
   1  -1  19  -10.60   13.70 
   1  -1  19   18.80   18.50 
  -1  -1 -19    1.00   13.60 
   1   1  20  -11.70   18.30 
  -1   1 -20   15.70   14.70 
   1   1  20  -21.80   13.90 
   1  -1  20    1.20   14.70 
  -1  -1 -20   16.70   14.50 
   1  -1  20    9.50   16.80 
  -1   3  20   20.20   18.70 
   1   3 -20   45.50   17.00 
  -1   3  20   53.79   19.30 
  -1  -3  20   29.60   15.90 
   1  -3 -20   38.60   14.80 
  -1  -3  20   27.90   21.10 
  -1   3  19    0.00   16.00 
  -1   3  19    2.00   18.30 
   1   3 -19   15.40   14.40 
  -1  -3  19   11.20   15.20 
  -1  -3  19  -11.60   16.00 
   1  -3 -19    1.10   13.10 
  -1   3  18   12.60   18.30 
  -1   3  18   39.50   17.60 
   1   3 -18   39.80   15.50 
  -1  -3  18   44.60   16.20 
   1  -3 -18   51.89   15.60 
  -1  -3  18   20.10   17.00 
  -1   3  17   -4.60   14.60 
   1   3 -17   19.40   13.70 
  -1   3  17   18.50   15.20 
  -1  -3  17    2.70   12.00 
   1  -3 -17   22.00   12.90 
  -1  -3  17    9.80   14.40 
  -1   3  16   74.49   19.00 
  -1   3  16  108.69   19.00 
   1   3 -16  113.99   19.00 
   1  -3 -16  131.49   17.50 
  -1  -3  16  106.39   17.80 
  -1  -3  16   60.39   17.90 
  -1   3  15   43.70   15.10 
  -1   3  15   36.20   15.50 
   1   3 -15   53.89   14.70 
  -1  -3  15   39.50   15.20 
  -1  -3  15   68.09   15.30 
   1  -3 -15   49.10   13.00 
  -1   3  14  170.68   20.30 
   1   3 -14  162.18   19.20 
  -1   3  14  147.39   20.60 
   1  -3 -14  172.38   18.20 
  -1  -3  14  118.49   19.20 
  -1  -3  14  170.58   18.60 
   1   3 -13   -2.20    9.90 
  -1   3  13   10.40   11.90 
  -1   3  13   -3.30   10.70 
   1   3 -13    8.40    8.30 
  -1  -3  13   -4.70   10.30 
   1  -3 -13    3.40    9.20 
   1  -3 -13   -1.20    9.20 
  -1  -3  13    0.60   10.00 
   1   3 -12  345.47   22.70 
  -1   3  12  363.26   24.00 
  -1   3  12  330.47   29.80 
  -1  -3  12  348.67   30.40 
   1  -3 -12  350.16   21.50 
   1  -3 -12  388.16   23.70 
  -1  -3  12  331.57   21.40 
  -1   3  11   16.10   10.70 
   1   3 -11   -9.80    8.60 
  -1   3  11   15.10    9.90 
  -1  -3  11   30.80    9.10 
  -1  -3  11   18.90   10.00 
   1  -3 -11   16.00    8.70 
   1  -3 -11   15.20    7.60 
   1   3 -10  551.74   28.00 
  -1   3  10  555.64   28.90 
  -1   3  10  581.24   34.80 
  -1   3  10  634.64   27.40 
   1  -3 -10  564.04   26.00 
   1  -3 -10  582.84   28.30 
  -1  -3  10  576.14   27.60 
  -1  -3  10  579.94   35.20 
  -1   3   9   66.09    9.30 
   1   3  -9   64.19   11.20 
  -1   3   9   68.49   11.30 
  -1   3   9   54.29   11.00 
   1  -3  -9   73.69    9.90 
   1  -3  -9   77.69   11.10 
  -1  -3   9   57.49   11.10 
   1  -3  -9   70.59   12.70 
  -1  -3   9   69.79    9.70 
  -1  -3   9   88.19   10.70 
   1   3  -8  303.77   18.40 
  -1   3   8  325.97   19.40 
  -1   3   8  342.17   24.10 
  -1  -3   8  328.47   24.00 
   1  -3  -8  300.87   25.40 
  -1  -3   8  314.27   17.20 
   1  -3  -8  312.37   18.50 
   1  -3  -8  329.47   22.10 
   1  -3  -8  339.67   17.00 
  -1  -3   8  318.87   17.00 
   1  -3  -8  320.67   18.40 
  -1  -3   8  304.07   23.40 
   1   3  -7   79.19    7.40 
  -1   3   7  107.29   11.80 
   1   3  -7  110.29   11.80 
  -1   3   7   82.79   11.00 
  -1   3   7  103.69    9.60 
  -1   3   7  102.99    8.30 
  -1   3   7  113.89   14.70 
   1  -3  -7   92.79   10.90 
   1  -3  -7  114.89   11.30 
   1  -3  -7   75.69   10.20 
  -1  -3   7   68.39   10.20 
  -1  -3   7  100.39   10.00 
   1  -3  -7   73.99   11.60 
  -1  -3   7   82.89   11.20 
   1  -3  -7  114.59    9.80 
  -1  -3   7  105.19    9.60 
  -1  -3   7  121.19   11.10 
  -1   3   6 1177.28   48.30 
   1   3  -6 1180.98   44.10 
  -1   3   6 1156.28   44.60 
  -1   3   6 1177.78   42.00 
  -1   3   6 1074.39   43.60 
  -1  -3   6 1164.78   42.00 
   1  -3  -6 1208.68   44.40 
   1  -3  -6 1206.48   50.59 
  -1  -3   6 1173.18   48.70 
   1  -3  -6 1207.78   44.40 
   1  -3  -6 1201.28   42.00 
  -1  -3   6 1172.88   42.30 
   1  -3  -6 1163.08   47.50 
   1   3  -5  189.08   12.60 
  -1   3   5  193.58   13.30 
  -1   3   5  204.08   10.50 
  -1   3   5  179.78   16.00 
  -1  -3   5  185.98   16.20 
   1  -3  -5  186.18   15.10 
  -1  -3   5  181.78   10.20 
   1  -3  -5  195.98   12.60 
   1  -3  -5  189.48   10.30 
  -1  -3   5  181.28   10.60 
   1  -3  -5  181.68   12.60 
   1  -3  -5  184.98   15.50 
  -1   3   4 1148.49   46.60 
   1   3  -4 1218.58   39.80 
  -1   3   4 1233.98   46.00 
  -1   3   4 1243.68   42.90 
   1   3  -4 1169.98   42.00 
  -1   3   4 1180.88   40.20 
   1  -3  -4 1118.99   40.10 
   1  -3  -4 1162.48   42.50 
   1  -3  -4 1139.29   42.20 
   1  -3  -4 1145.99   44.80 
  -1  -3   4 1130.19   40.30 
  -1  -3   4 1193.68   40.00 
  -1  -3   4 1178.18   45.80 
   1  -3  -4 1126.69   46.60 
  -1   3   3 2314.77   75.09 
   1   3  -3 2101.99   71.99 
  -1   3   3 2140.29   77.89 
   1   3  -3 2278.47   72.09 
   1   3  -3 2237.18   74.59 
  -1   3   3 2234.58   72.59 
  -1   3   3 2154.78   77.19 
  -1   3   3 2043.20   74.49 
  -1  -3   3 2100.09   72.39 
   1  -3  -3 2237.58   74.89 
   1  -3  -3 2105.39   72.49 
   1  -3  -3 2243.98   74.89 
   1  -3  -3 2212.88   76.89 
   1  -3  -3 2513.75   75.49 
   1  -3  -3 2216.08   78.09 
   1   3  -2  350.36   15.10 
  -1   3   2  360.26   17.90 
  -1   3   2  357.06   15.40 
  -1   3   2  342.07   15.50 
  -1   3   2  354.66   15.40 
  -1   3   2  345.97   12.90 
   1   3  -2  401.86   16.70 
  -1   3   2  408.66   18.70 
  -1   3   2  362.36   15.40 
   1  -3  -2  370.16   15.70 
  -1  -3   2  352.06   12.30 
   1  -3  -2  363.96   15.50 
  -1  -3   2  344.17   15.00 
   1  -3  -2  384.66   17.90 
   1  -3  -2  353.66   17.80 
  -1  -3   2  369.66   16.20 
  -1   3   1    1.80    2.00 
   1   3  -1    5.20    3.90 
  -1   3   1    4.00    3.20 
  -1   3   1    1.60    3.80 
  -1   3   1    6.20    4.40 
  -1   3   1    3.30    4.20 
   1   3  -1    6.70    4.00 
  -1   3   1    5.90    3.80 
   1  -3  -1    0.20    1.80 
   1  -3  -1    4.50    3.40 
  -1  -3   1    4.50    3.50 
   1  -3  -1    5.40    3.90 
   1  -3  -1    0.70    3.60 
   1  -3  -1   11.20    4.50 
  -1  -3   1    5.50    4.50 
   1  -3  -1    5.40    4.00 
   1  -3  -1    2.30    2.80 
   1   3   0 1217.18   40.20 
  -1   3   0 1212.58   40.60 
  -1   3   0 1196.38   42.00 
  -1   3   0 1170.98   41.10 
  -1   3   0 1208.98   41.00 
   1   3   0 1252.17   43.00 
   1   3   0 1221.28   39.80 
   1   3   0 1218.48   42.40 
   1   3   0 1234.78   39.90 
  -1   3   0 1182.48   42.20 
  -1  -3   0 1238.08   42.30 
   1  -3   0 1196.58   42.20 
  -1  -3   0 1188.68   40.50 
   1  -3   0 1227.58   41.20 
  -1  -3   0 1198.58   40.30 
   1  -3   0 1265.47   41.20 
  -1  -3   0 1209.38   40.20 
   1  -3   0 1215.28   40.50 
  -1  -3   0 1187.08   41.60 
  -1  -3   0 1278.37   43.20 
   1  -3   0 1241.48   42.10 
  -1   3  -1  130.89    7.30 
  -1   3  -1  118.19    8.70 
   1   3   1  137.89   10.50 
   1   3   1  128.79    7.00 
   1   3   1  119.19    7.30 
  -1   3  -1  113.19    6.60 
   1   3   1  123.29    7.50 
   1   3   1  124.09    7.30 
  -1  -3  -1  128.69   10.40 
  -1  -3  -1  115.89    7.20 
   1  -3   1  130.69    8.70 
  -1  -3  -1  118.59    7.00 
   1  -3   1  129.29    9.80 
  -1  -3  -1  137.39    7.30 
   1  -3   1  124.79    6.80 
  -1  -3  -1  121.79    7.50 
   1  -3   1  124.59    6.80 
   1   3   2 3308.77  109.99 
   1   3   2 3340.87  109.99 
   1   3   2 3053.99  110.19 
  -1   3  -2 3322.77  108.79 
   1   3   2 3483.85  113.59 
  -1   3  -2 3351.86  109.89 
   1   3   2 3269.87  109.89 
  -1  -3  -2 3370.46  109.99 
  -1  -3  -2 3555.64  113.99 
   1  -3   2 3370.36  109.79 
   1  -3   2 3350.96  108.99 
  -1  -3  -2 3411.56  109.89 
   1  -3   2 3125.99  110.89 
  -1  -3  -2 3373.26  109.99 
   1  -3   2 3249.87  109.09 
   1  -3   2 3385.36  109.79 
   1   3   3  562.64   22.50 
   1   3   3  522.65   22.10 
   1   3   3  469.75   23.20 
   1   3   3  531.35   22.10 
  -1   3  -3  560.04   20.50 
  -1   3  -3  573.04   22.10 
   1   3   3  585.64   26.90 
  -1  -3  -3  559.54   26.10 
   1  -3   3  558.64   20.80 
  -1  -3  -3  564.04   22.40 
  -1  -3  -3  547.25   22.10 
  -1  -3  -3  520.35   22.00 
   1  -3   3  559.44   21.00 
   1  -3   3  542.25   23.00 
  -1   3  -4  438.26   18.50 
  -1   3  -4  465.55   18.60 
   1   3   4  474.85   20.80 
   1   3   4  499.55   22.30 
  -1   3  -4  459.25   20.30 
   1   3   4  460.45   20.10 
  -1  -3  -4  469.45   20.60 
   1  -3   4  474.35   22.10 
  -1  -3  -4  459.85   21.40 
  -1  -3  -4  447.26   20.50 
   1  -3   4  472.85   19.50 
  -1  -3  -4  513.05   26.80 
   1  -3   4  464.55   19.00 
  -1  -3  -4  467.25   18.30 
  -1   3  -5    7.50    7.00 
   1   3   5   10.40    5.50 
  -1   3  -5   22.50    5.40 
   1   3   5   23.60    7.20 
  -1   3  -5   21.50    5.40 
  -1  -3  -5   19.70    5.40 
   1  -3   5   14.80    5.90 
  -1  -3  -5   11.90    6.60 
   1  -3   5    9.70    5.20 
  -1  -3  -5   12.00    7.10 
   1  -3   5   15.10    5.70 
  -1  -3  -5   17.10    5.40 
  -1  -3  -5   17.40    7.00 
   1   3   6  992.60   38.10 
  -1   3  -6  946.01   35.40 
  -1   3  -6  928.91   37.20 
   1   3   6  993.60   40.10 
  -1   3  -6  974.70   35.80 
   1  -3   6  861.91   36.50 
   1  -3   6  956.40   36.00 
  -1  -3  -6  978.10   35.20 
  -1  -3  -6  961.60   39.30 
  -1  -3  -6  960.60   37.60 
   1  -3   6  965.50   36.30 
  -1  -3  -6  968.00   37.70 
   1  -3   6  937.31   40.90 
  -1  -3  -6  972.30   44.50 
   1   3   7  178.48   14.80 
   1   3   7  152.88   19.40 
  -1   3  -7  171.28   11.90 
  -1   3  -7  195.28   13.00 
  -1   3  -7  212.78   13.00 
   1   3   7  199.28   17.20 
   1  -3   7  197.78   13.70 
   1  -3   7  212.58   18.70 
   1  -3   7  209.68   14.00 
  -1  -3  -7  180.48   14.50 
  -1  -3  -7  209.78   19.20 
  -1  -3  -7  201.78   12.80 
  -1  -3  -7  194.68   14.30 
   1  -3   7  227.78   13.80 
   1  -3   7  214.88   18.70 
  -1  -3  -7  209.28   16.10 
   1   3   8  214.98   19.40 
   1   3   8  218.08   16.50 
  -1   3  -8  214.28   13.60 
  -1   3  -8  255.17   16.50 
  -1  -3  -8  247.48   16.70 
   1  -3   8  219.58   22.40 
   1  -3   8  283.77   21.80 
  -1  -3  -8  235.68   24.00 
  -1  -3  -8  254.47   18.40 
  -1  -3  -8  242.68   16.50 
   1  -3   8  239.48   15.50 
  -1  -3  -8  254.47   14.30 
   1  -3   8  219.88   15.30 
  -1   3  -9   17.10    8.80 
  -1   3  -9   21.10    7.20 
   1   3   9    2.30    8.40 
   1   3   9    7.50    7.80 
  -1  -3  -9   25.60    7.40 
   1  -3   9   13.20    8.20 
   1  -3   9   37.70    9.20 
  -1  -3  -9   21.60    8.50 
  -1  -3  -9   12.80    8.40 
  -1  -3  -9   11.20    9.20 
   1   3  10   89.49   13.90 
   1   3  10  120.79   14.70 
  -1   3 -10  130.29   12.60 
  -1   3 -10  141.99   15.30 
  -1  -3 -10  122.59   14.20 
  -1  -3 -10   85.09   14.40 
   1  -3  10   91.09   13.40 
  -1  -3 -10  151.88   13.90 
   1  -3  10  139.49   13.60 
  -1   3 -11   50.59   10.50 
   1   3  11   45.40   11.90 
  -1   3 -11   64.49   10.10 
   1   3  11   21.80   10.30 
   1  -3  11   28.30   10.60 
   1  -3  11   54.89   10.90 
  -1  -3 -11   35.10   10.60 
  -1  -3 -11   46.30   10.20 
  -1  -3 -11   52.59   12.50 
  -1   3 -12  137.89   13.90 
   1   3  12  121.09   17.20 
   1   3  12  128.89   16.80 
  -1   3 -12  155.38   17.20 
   1  -3  12  117.09   15.00 
  -1  -3 -12  130.79   16.10 
   1  -3  12   95.39   15.20 
  -1  -3 -12  130.79   14.40 
  -1  -3 -12   96.99   17.30 
  -1   3 -13   36.50   10.00 
   1   3  13   16.60   11.30 
  -1   3 -13   46.90   13.00 
   1   3  13   40.20   13.60 
   1  -3  13   32.70   12.80 
  -1  -3 -13   27.40   11.10 
  -1  -3 -13   26.90   11.20 
   1  -3  13   41.70   11.90 
   1   3  14   64.89   15.80 
   1   3  14   87.99   16.70 
  -1   3 -14   88.39   15.70 
  -1   3 -14   65.79   12.00 
   1  -3  14   54.39   15.20 
  -1  -3 -14   94.09   14.30 
  -1  -3 -14   64.89   13.90 
   1  -3  14   68.29   14.60 
   1   3  15   26.80   14.00 
   1   3  15   33.80   14.30 
  -1   3 -15   35.80   13.70 
   1  -3  15   18.60   13.40 
  -1  -3 -15   18.20   11.30 
  -1  -3 -15   27.60   11.90 
   1  -3  15   27.20   12.30 
  -1   3 -16   77.99   16.90 
   1   3  16   73.29   17.80 
   1   3  16   54.99   17.00 
  -1  -3 -16   52.89   15.50 
   1  -3  16   47.70   16.40 
   1  -3  16   86.59   17.50 
  -1  -3 -16   74.29   14.50 
  -1   3 -17   64.69   15.60 
   1   3  17   51.59   17.60 
   1   3  17   54.29   16.70 
  -1  -3 -17   49.50   14.80 
   1  -3  17   63.39   16.00 
   1  -3  17   26.80   15.60 
  -1   3 -18   15.10   14.40 
   1   3  18   -9.50   14.80 
   1   3  18   33.70   16.50 
   1  -3  18   16.00   15.60 
   1  -3  18   -8.00   13.60 
  -1  -3 -18   33.60   13.90 
   1   3  19   19.40   17.60 
  -1   3 -19   19.00   14.70 
   1   3  19    3.40   16.10 
   1  -3  19   11.80   14.90 
  -1  -3 -19    4.90   14.70 
   1  -3  19   22.40   17.90 
   1   3  20   -6.50   17.80 
   1   3  20  -34.90   15.50 
  -1   3 -20   36.70   16.00 
  -1  -3 -20   10.00   12.80 
   1  -3  20  -18.60   17.40 
   1  -3  20    8.70   15.20 
  -1   5  20  -28.50   16.50 
   1   5 -20   23.70   15.50 
  -1   5  20   -2.20   16.50 
  -1  -5  20    8.80   18.80 
  -1  -5  20   36.10   15.30 
  -1   5  19   40.00   16.70 
  -1   5  19  -14.00   16.90 
   1   5 -19   27.30   15.10 
  -1  -5  19   17.20   15.20 
  -1  -5  19    4.30   16.90 
   1  -5 -19   26.60   13.80 
   1   5 -18   63.99   17.80 
  -1   5  18   -7.60   15.80 
  -1   5  18   26.90   16.20 
  -1  -5  18   42.40   14.20 
   1  -5 -18   28.90   13.00 
  -1  -5  18   32.90   17.40 
  -1   5  17   -1.00   15.10 
  -1   5  17   14.40   14.40 
   1   5 -17   -9.20   11.90 
   1  -5 -17    0.70   10.70 
  -1  -5  17   24.10   13.90 
  -1  -5  17   -0.50   13.80 
  -1   5  16   41.00   16.90 
   1   5 -16   96.19   18.10 
  -1   5  16   66.09   17.00 
   1  -5 -16   81.39   14.40 
  -1  -5  16   75.19   15.00 
  -1  -5  16   38.80   16.40 
  -1   5  15  108.09   18.10 
   1   5 -15   82.49   16.90 
  -1   5  15   51.99   16.70 
   1  -5 -15  100.19   14.80 
  -1  -5  15   86.29   15.70 
  -1  -5  15   73.49   17.80 
  -1   5  14   99.09   16.80 
  -1   5  14   83.89   17.40 
   1   5 -14  117.59   17.30 
  -1  -5  14   71.59   17.00 
   1  -5 -14  108.99   14.30 
  -1  -5  14   82.19   14.30 
   1  -5 -14   97.39   19.20 
  -1   5  13   68.49   15.50 
  -1   5  13   66.89   15.10 
   1   5 -13   93.99   11.40 
   1   5 -13   97.09   16.20 
   1  -5 -13   85.59   15.40 
   1  -5 -13   96.29   13.70 
  -1  -5  13   80.69   13.20 
  -1  -5  13   58.49   15.50 
  -1   5  12   37.90   13.00 
   1   5 -12   47.70   12.60 
  -1   5  12   41.90   12.60 
   1   5 -12   60.39    9.50 
   1  -5 -12   48.80   10.40 
  -1  -5  12   36.20   10.60 
   1  -5 -12   42.10   11.80 
  -1  -5  12   33.50   12.10 
  -1   5  11  103.19   15.10 
   1   5 -11   76.89   13.80 
  -1   5  11   73.39   13.90 
   1  -5 -11  102.49   14.10 
  -1  -5  11   87.49   13.90 
   1  -5 -11   81.59   13.30 
  -1  -5  11  116.29   13.40 
   1  -5 -11   94.39   11.10 
  -1   5  10  492.25   22.10 
  -1   5  10  462.85   26.30 
  -1   5  10  477.95   32.90 
   1   5 -10  438.96   25.20 
   1  -5 -10  463.05   25.70 
   1  -5 -10  459.25   22.20 
  -1  -5  10  481.45   32.10 
   1  -5 -10  467.45   34.80 
  -1  -5  10  481.05   23.70 
  -1   5   9   26.40    9.90 
   1   5  -9   26.00    9.80 
  -1   5   9   42.60    7.60 
  -1   5   9   40.50   10.40 
  -1  -5   9   28.00    9.30 
  -1  -5   9   18.80    7.10 
  -1  -5   9   34.80    7.80 
   1  -5  -9   21.30    8.10 
   1  -5  -9   33.40    9.10 
   1  -5  -9   37.10    7.50 
   1  -5  -9   31.00    9.60 
  -1   5   8  328.57   16.00 
   1   5  -8  359.16   20.00 
  -1   5   8  354.06   20.60 
  -1   5   8  354.16   25.00 
   1  -5  -8  326.17   19.80 
   1  -5  -8  349.96   20.00 
   1  -5  -8  335.47   23.10 
  -1  -5   8  327.77   17.00 
   1  -5  -8  343.47   27.10 
  -1  -5   8  359.56   24.50 
   1  -5  -8  345.07   16.50 
  -1  -5   8  334.77   25.20 
  -1  -5   8  342.37   17.50 
  -1   5   7  642.24   29.60 
   1   5  -7  637.74   28.90 
   1   5  -7  668.93   25.30 
  -1   5   7  622.64   28.80 
  -1   5   7  705.03   34.30 
  -1   5   7  648.14   25.50 
  -1   5   7  625.34   35.70 
   1  -5  -7  622.84   25.40 
   1  -5  -7  660.43   29.60 
  -1  -5   7  655.93   26.40 
  -1  -5   7  699.63   34.50 
  -1  -5   7  644.24   25.90 
  -1  -5   7  629.84   28.60 
   1  -5  -7  692.43   32.80 
   1  -5  -7  664.93   29.40 
   1  -5  -7  682.53   36.70 
  -1   5   6  923.71   44.50 
  -1   5   6 1001.30   39.50 
  -1   5   6  978.40   38.80 
  -1   5   6 1043.80   35.50 
   1   5  -6  994.60   34.80 
   1   5  -6  993.90   38.90 
  -1   5   6  973.40   43.20 
  -1  -5   6 1056.89   44.40 
   1  -5  -6  952.30   38.90 
   1  -5  -6  938.21   39.00 
   1  -5  -6 1014.20   45.80 
   1  -5  -6  993.90   42.20 
  -1  -5   6  995.90   36.00 
   1  -5  -6  975.10   35.30 
  -1  -5   6 1010.40   35.70 
  -1   5   5  435.06   23.90 
   1   5  -5  389.86   19.20 
  -1   5   5  387.96   19.60 
  -1   5   5  411.36   15.60 
   1  -5  -5  396.86   15.50 
  -1  -5   5  306.17   17.70 
   1  -5  -5  393.76   19.90 
  -1  -5   5  387.26   15.50 
   1  -5  -5  414.76   19.60 
   1  -5  -5  368.86   21.40 
  -1  -5   5  389.06   16.20 
   1  -5  -5  401.86   24.70 
   1  -5  -5  388.56   19.60 
  -1   5   4 1105.29   45.30 
   1   5  -4 1159.48   36.60 
  -1   5   4 1111.49   44.50 
   1   5  -4 1085.89   40.70 
  -1   5   4 1146.69   37.30 
  -1   5   4 1105.19   41.30 
   1  -5  -4 1113.69   41.20 
   1  -5  -4 1109.79   43.60 
  -1  -5   4 1118.29   37.70 
  -1  -5   4 1102.99   37.10 
   1  -5  -4 1126.09   41.40 
   1  -5  -4  941.81   40.90 
   1  -5  -4 1087.39   37.20 
   1  -5  -4 1147.59   45.80 
  -1  -5   4 1094.69   40.60 
  -1  -5   4 1069.79   42.40 
  -1   5   3  381.56   17.40 
  -1   5   3  361.36   17.30 
  -1   5   3  381.26   20.80 
  -1   5   3  379.96   21.00 
   1   5  -3  371.46   19.10 
  -1   5   3  368.66   13.20 
   1   5  -3  352.06   16.90 
  -1   5   3  374.86   16.50 
  -1  -5   3  365.26   13.50 
  -1  -5   3  410.46   19.20 
  -1  -5   3  375.46   16.90 
   1  -5  -3  343.47   17.70 
   1  -5  -3  367.86   19.90 
   1  -5  -3  407.46   22.10 
   1  -5  -3  368.96   17.40 
   1  -5  -3  376.46   17.60 
  -1   5   2  829.92   32.70 
  -1   5   2  847.92   34.10 
   1   5  -2  845.02   33.00 
  -1   5   2  833.42   31.10 
  -1   5   2  852.61   31.10 
  -1   5   2  844.62   29.60 
   1   5  -2  842.02   30.60 
  -1   5   2  856.71   31.20 
  -1   5   2  894.31   34.60 
  -1  -5   2  830.82   27.70 
   1  -5  -2  859.91   31.30 
  -1  -5   2  818.92   32.50 
   1  -5  -2  814.12   31.10 
  -1  -5   2  836.42   30.60 
   1  -5  -2  776.82   33.30 
   1  -5  -2  829.12   33.80 
   1  -5  -2  820.82   31.30 
  -1   5   1   25.40    5.10 
   1   5  -1   19.30    5.10 
  -1   5   1   13.70    5.80 
  -1   5   1   21.40    5.30 
  -1   5   1   16.00    7.00 
  -1   5   1   19.30    4.60 
   1   5  -1   13.20    7.20 
  -1   5   1   15.90    2.90 
  -1   5   1   18.50    5.30 
  -1  -5   1   16.20    4.80 
   1  -5  -1   22.10    5.10 
   1  -5  -1   24.70    7.30 
  -1  -5   1   20.80    6.80 
  -1  -5   1   13.30    4.50 
   1  -5  -1   30.20    5.60 
   1  -5  -1   17.60    2.60 
   1  -5  -1   16.60    5.90 
   1  -5  -1   22.10    4.80 
   1  -5  -1   28.00    5.60 
  -1   5   0  192.28    9.50 
   1   5   0  197.38   12.10 
  -1   5   0  200.48    9.80 
   1   5   0  180.18    7.60 
  -1   5   0  194.38    9.90 
   1   5   0  175.88   12.50 
   1   5   0  182.68    7.70 
  -1   5   0  186.68    8.60 
  -1   5   0  191.78    9.40 
   1   5   0  176.98    8.30 
  -1   5   0  180.18   12.40 
   1   5   0  175.08    8.70 
   1  -5   0  153.98   11.20 
  -1  -5   0  176.18    8.60 
   1  -5   0  186.38   10.40 
  -1  -5   0  168.38    9.70 
  -1  -5   0  168.38   11.60 
  -1  -5   0  186.98    8.50 
   1  -5   0  186.98   12.50 
   1  -5   0  198.78    9.90 
  -1  -5   0  176.68    8.60 
  -1  -5   0  166.88   12.10 
   1  -5   0  204.48   11.30 
   1  -5   0  197.28   10.10 
  -1  -5   0  165.38    8.30 
   1   5   1 1668.83   55.19 
  -1   5  -1 1629.14   55.19 
   1   5   1 1615.94   54.89 
  -1   5  -1 1597.44   54.39 
   1   5   1 1604.94   57.79 
   1   5   1 1639.14   58.79 
   1   5   1 1606.04   54.09 
   1   5   1 1658.83   54.99 
  -1   5  -1 1741.03   57.99 
  -1  -5  -1 1629.24   58.99 
   1  -5   1 1598.44   57.99 
  -1  -5  -1 1655.13   55.39 
   1  -5   1 1705.33   57.69 
   1  -5   1 1669.53   55.09 
  -1  -5  -1 1615.44   53.69 
  -1  -5  -1 1586.94   54.19 
  -1  -5  -1 1616.54   55.29 
   1  -5   1 1622.34   54.39 
  -1  -5  -1 1594.74   56.49 
   1  -5   1 1598.54   54.69 
  -1   5  -2   47.00    6.50 
   1   5   2   43.70    6.30 
   1   5   2   42.10    6.10 
   1   5   2   34.70    6.80 
   1   5   2   30.50    5.40 
   1   5   2   52.59    6.10 
  -1   5  -2   52.39    7.90 
  -1   5  -2   49.20    4.70 
   1  -5   2   48.50    5.20 
   1  -5   2   53.89    6.50 
   1  -5   2   45.90    5.60 
  -1  -5  -2   31.40    5.20 
  -1  -5  -2   41.10    6.20 
  -1  -5  -2   43.50    7.10 
   1  -5   2   48.20    8.50 
  -1  -5  -2   37.40    7.30 
   1   5   3  306.17   20.10 
   1   5   3  334.87   15.30 
   1   5   3  313.37   16.70 
   1   5   3  288.57   15.80 
  -1   5  -3  315.97   15.20 
  -1   5  -3  322.97   12.60 
   1   5   3  270.67   14.80 
  -1  -5  -3  295.47   15.70 
  -1  -5  -3  291.47   15.40 
   1  -5   3  306.17   13.40 
  -1  -5  -3  345.87   21.30 
   1  -5   3  313.57   15.00 
   1  -5   3  313.07   13.60 
  -1  -5  -3  290.87   15.20 
   1  -5   3  271.07   15.60 
  -1   5  -4  560.34   24.70 
   1   5   4  631.34   25.60 
  -1   5  -4  601.24   22.60 
   1   5   4  612.64   26.50 
   1   5   4  649.83   27.70 
   1   5   4  628.04   26.00 
  -1  -5  -4  648.94   22.40 
  -1  -5  -4  629.94   26.10 
   1  -5   4  596.64   26.20 
   1  -5   4  638.34   23.90 
   1  -5   4  607.44   25.50 
  -1  -5  -4  615.74   26.50 
  -1  -5  -4  633.24   26.00 
  -1  -5  -4  661.23   32.20 
   1  -5   4  611.94   23.60 
   1   5   5  791.12   33.40 
  -1   5  -5  741.53   30.70 
  -1   5  -5  731.73   27.50 
   1   5   5  767.52   31.30 
   1  -5   5  758.82   32.30 
  -1  -5  -5  709.83   27.30 
  -1  -5  -5  818.12   31.70 
   1  -5   5  755.12   29.00 
   1  -5   5  739.13   28.60 
  -1  -5  -5  799.22   37.00 
  -1  -5  -5  807.12   31.50 
  -1  -5  -5  780.62   32.30 
   1  -5   5  705.23   29.90 
  -1   5  -6 1888.11   67.89 
   1   5   6 1955.40   75.39 
  -1   5  -6 1867.01   64.49 
   1   5   6 1914.71   68.69 
   1   5   6 1883.81   68.09 
   1   5   6 1861.61   70.19 
   1  -5   6 2029.10   71.49 
   1  -5   6 1874.41   66.09 
  -1  -5  -6 1954.00   68.79 
   1  -5   6 1927.51   65.79 
  -1  -5  -6 1855.51   69.49 
  -1  -5  -6 1926.71   64.69 
  -1  -5  -6 1806.02   75.29 
  -1  -5  -6 1830.52   68.09 
   1   5   7  107.19   12.50 
  -1   5  -7   95.19    8.30 
   1   5   7   82.19   10.30 
  -1   5  -7   82.99   11.30 
  -1   5  -7  108.69   12.60 
   1   5   7   80.39   13.70 
   1   5   7  103.99   11.70 
  -1  -5  -7   75.89   12.30 
   1  -5   7   89.19   12.40 
  -1  -5  -7  103.09   12.50 
  -1  -5  -7  103.89   11.80 
   1  -5   7   85.69    9.30 
   1  -5   7   61.79    9.80 
  -1  -5  -7   98.79    8.70 
  -1  -5  -7  106.29   12.70 
   1  -5   7   94.69    9.80 
   1   5   8  173.58   19.20 
  -1   5  -8  194.28   15.00 
   1   5   8  171.48   15.40 
  -1   5  -8  180.98   11.60 
  -1  -5  -8  184.18   16.10 
  -1  -5  -8  172.48   15.10 
  -1  -5  -8  146.79   14.30 
   1  -5   8  185.58   12.50 
  -1  -5  -8  172.98   11.60 
   1  -5   8  206.88   20.00 
  -1  -5  -8  113.79   15.70 
   1  -5   8  177.98   13.70 
   1  -5   8  178.38   19.40 
   1   5   9  153.88   16.00 
   1   5   9  109.09   13.40 
  -1   5  -9  153.68   10.80 
  -1   5  -9  139.59   12.60 
  -1  -5  -9  112.49   15.90 
   1  -5   9   96.29   13.40 
   1  -5   9   92.49   14.40 
   1  -5   9  138.89   12.60 
  -1  -5  -9  151.68   14.90 
  -1  -5  -9  142.49   11.30 
  -1  -5  -9  138.89   13.00 
  -1   5 -10  100.59   10.10 
  -1   5 -10   88.89   13.60 
   1   5  10  104.09   14.60 
   1   5  10   70.59   12.20 
  -1  -5 -10   87.49   10.10 
  -1  -5 -10   88.89   13.60 
   1  -5  10   88.49   11.60 
   1  -5  10   83.29   13.80 
  -1  -5 -10   58.19   13.40 
   1   5  11   86.59   13.90 
  -1   5 -11  112.89   11.40 
  -1   5 -11  140.19   16.30 
   1   5  11  128.59   16.50 
  -1  -5 -11   92.69   16.10 
   1  -5  11  108.39   13.90 
  -1  -5 -11  133.29   13.20 
  -1  -5 -11  126.09   15.80 
   1  -5  11   86.69   14.50 
   1   5  12   54.59   13.60 
  -1   5 -12   85.49   15.00 
  -1   5 -12   66.49    9.90 
   1   5  12   53.59   12.90 
  -1  -5 -12   59.59   13.10 
  -1  -5 -12   66.79   11.70 
   1  -5  12   89.89   13.20 
  -1  -5 -12   43.10   14.10 
   1  -5  12   51.99   13.20 
  -1   5 -13   43.30   13.10 
   1   5  13   22.70   13.00 
   1   5  13   51.89   14.30 
  -1  -5 -13   35.80   14.20 
   1  -5  13   42.90   13.50 
  -1  -5 -13   32.40    9.90 
  -1  -5 -13   29.30   11.80 
   1  -5  13   52.29   13.20 
  -1   5 -14   72.19   15.60 
   1   5  14   68.09   16.10 
   1   5  14   54.09   14.80 
  -1  -5 -14   79.79   13.70 
   1  -5  14   49.99   14.90 
  -1  -5 -14   49.00   16.40 
  -1  -5 -14   84.09   15.60 
   1  -5  14   73.59   15.30 
  -1   5 -15   12.90   13.20 
   1   5  15   24.60   13.90 
   1   5  15   21.50   14.80 
   1  -5  15   14.10   13.10 
  -1  -5 -15    3.40   12.00 
  -1  -5 -15   29.10   10.60 
   1  -5  15    7.50   13.10 
   1   5  16   13.30   14.20 
  -1   5 -16   92.29   18.10 
   1   5  16   55.49   16.70 
  -1  -5 -16   71.29   14.10 
   1  -5  16   58.89   15.60 
  -1  -5 -16   57.49   14.80 
   1  -5  16   48.70   16.60 
   1   5  17   30.90   16.70 
  -1   5 -17   53.09   15.60 
   1   5  17   45.60   16.50 
   1  -5  17   49.40   14.60 
   1  -5  17   34.30   16.90 
  -1  -5 -17   37.50   12.50 
  -1   5 -18   29.60   14.80 
   1   5  18    5.80   17.60 
   1   5  18   -2.20   14.50 
   1  -5  18   10.30   16.00 
  -1  -5 -18   18.60   13.20 
   1  -5  18   11.30   13.30 
  -1   5 -19   23.40   15.30 
   1   5  19  -19.20   17.70 
   1   5  19  -15.00   15.00 
  -1  -5 -19   19.00   12.40 
   1  -5  19  -11.20   14.10 
   1  -5  19   11.80   15.10 
   1   5  20  -10.40   19.00 
  -1   5 -20    6.20   14.10 
   1   5  20   -7.80   17.50 
   1  -5  20   19.50   16.80 
   1  -5  20   15.10   18.30 
  -1   7  19   35.60   18.00 
  -1   7  19   -9.70   18.20 
   1   7 -19   22.60   15.60 
  -1  -7  19   28.10   17.60 
  -1  -7  19   14.10   14.50 
  -1   7  18   -7.30   17.60 
  -1   7  18   22.30   16.40 
   1   7 -18   36.70   15.80 
  -1  -7  18   40.90   15.50 
  -1  -7  18   39.60   18.20 
   1   7 -17  122.29   20.00 
  -1   7  17   59.69   19.80 
  -1   7  17   89.39   19.90 
   1  -7 -17   93.59   14.90 
  -1  -7  17   93.09   16.70 
  -1  -7  17   58.19   19.40 
  -1   7  16  -18.90   13.30 
  -1   7  16   22.60   15.10 
   1   7 -16    9.20   12.80 
   1  -7 -16    6.00   10.10 
  -1  -7  16   28.00   12.40 
  -1  -7  16    2.20   13.80 
  -1   7  15  109.09   19.30 
  -1   7  15   82.09   19.20 
   1   7 -15  168.08   21.10 
  -1  -7  15  146.39   17.70 
   1  -7 -15  139.29   15.70 
  -1  -7  15   87.29   19.20 
   1   7 -14    9.90   12.80 
  -1   7  14   -2.60   12.80 
  -1   7  14   -0.80   12.00 
   1  -7 -14   -5.20   10.80 
  -1  -7  14   -7.10    9.20 
  -1  -7  14  -10.30    9.80 
   1  -7 -14    4.90    8.90 
  -1   7  13  133.99   19.20 
  -1   7  13  113.39   18.70 
   1   7 -13  137.29   19.00 
   1  -7 -13  149.29   19.20 
  -1  -7  13  102.59   18.20 
   1  -7 -13  147.19   14.60 
  -1  -7  13  139.69   16.00 
   1   7 -12   17.40    6.70 
  -1   7  12   19.10   11.90 
   1   7 -12   18.10   12.20 
  -1   7  12   20.10   13.30 
   1  -7 -12   28.60    8.50 
  -1  -7  12   16.50   11.20 
   1  -7 -12    9.90   10.80 
  -1  -7  12   14.10    9.00 
   1   7 -11  107.89   14.20 
  -1   7  11   82.29   14.30 
  -1   7  11   76.09   14.70 
   1   7 -11   95.29    9.70 
   1  -7 -11   98.19   14.80 
  -1  -7  11   60.49   13.70 
   1  -7 -11  102.89   11.00 
  -1  -7  11   98.19   11.80 
   1  -7 -11   96.79   15.00 
   1  -7 -11   62.79   14.70 
  -1   7  10   44.30   11.70 
   1   7 -10   58.69   12.30 
  -1   7  10   39.80   11.80 
  -1  -7  10   35.00   11.50 
  -1  -7  10   51.09    9.20 
   1  -7 -10   56.59   12.30 
   1  -7 -10   48.90   11.50 
   1  -7 -10   57.69    8.30 
   1  -7 -10   35.00   11.70 
  -1   7   9  527.75   26.90 
   1   7  -9  463.75   25.40 
  -1   7   9  453.25   31.10 
   1  -7  -9  482.25   25.80 
  -1  -7   9  479.05   32.00 
  -1  -7   9  443.06   21.90 
   1  -7  -9  504.85   27.10 
  -1  -7   9  474.45   21.80 
   1  -7  -9  496.75   34.30 
   1  -7  -9  464.45   20.70 
   1  -7  -9  476.45   26.00 
  -1   7   8    1.50    8.10 
  -1   7   8   11.00    8.60 
  -1   7   8   -5.30    4.30 
   1   7  -8   -8.80    7.90 
   1  -7  -8    9.40    8.10 
  -1  -7   8    3.40    7.30 
   1  -7  -8    1.80    7.30 
   1  -7  -8   -2.30    7.60 
   1  -7  -8    5.40    8.30 
  -1  -7   8   -0.20    5.50 
  -1  -7   8    0.20    5.10 
   1  -7  -8   -2.90    4.30 
  -1   7   7  754.32   33.60 
  -1   7   7  782.72   38.40 
   1   7  -7  783.42   33.10 
  -1   7   7  727.03   27.90 
   1  -7  -7  760.22   36.20 
   1  -7  -7  744.83   40.40 
  -1  -7   7  749.42   29.30 
  -1  -7   7  770.22   28.90 
   1  -7  -7  765.52   33.20 
   1  -7  -7  754.22   28.00 
   1  -7  -7  806.32   34.10 
   1  -7  -7  742.83   33.50 
  -1   7   6  225.28   16.30 
  -1   7   6  237.88   10.90 
  -1   7   6  233.78   22.00 
  -1   7   6  222.78   15.50 
  -1   7   6  244.08   20.90 
   1   7  -6  262.17   16.20 
   1   7  -6  277.57   10.10 
  -1  -7   6  236.08   12.20 
   1  -7  -6  230.78   16.80 
   1  -7  -6  212.48   21.50 
  -1  -7   6  246.18   15.70 
  -1  -7   6  239.38   17.80 
  -1  -7   6  242.78   11.60 
   1  -7  -6  230.38   16.30 
   1  -7  -6  245.78   16.20 
   1  -7  -6  238.48   18.20 
   1  -7  -6  225.08   10.70 
  -1   7   5 2164.18   74.79 
   1   7  -5 2271.57   79.89 
  -1   7   5 2242.38   80.09 
  -1   7   5 2218.48   80.29 
  -1   7   5 2323.17   84.49 
  -1   7   5 2267.27   85.99 
  -1  -7   5 2216.48   75.39 
  -1  -7   5 2216.58   79.59 
   1  -7  -5 2378.66   86.49 
   1  -7  -5 2525.15   81.59 
   1  -7  -5 2312.17   80.39 
  -1  -7   5 2288.97   75.99 
   1  -7  -5 2197.78   82.89 
   1  -7  -5 2277.17   80.69 
  -1  -7   5 2340.37   82.69 
  -1   7   4   62.49    7.70 
   1   7  -4   74.29    9.20 
  -1   7   4   48.30    8.80 
  -1   7   4   66.39    9.20 
  -1  -7   4   75.29    5.60 
   1  -7  -4   52.59    9.10 
   1  -7  -4   71.79    9.50 
   1  -7  -4   65.19    9.30 
  -1  -7   4   67.09    4.20 
  -1  -7   4   78.79    9.10 
   1  -7  -4   42.80    8.20 
  -1  -7   4   83.29   11.30 
   1  -7  -4   52.89    9.30 
  -1   7   3  793.22   35.30 
  -1   7   3  793.02   31.60 
  -1   7   3  782.52   33.90 
   1   7  -3  831.72   34.30 
  -1   7   3  787.12   31.50 
  -1   7   3  782.62   28.90 
   1   7  -3  812.42   31.10 
  -1   7   3  791.92   35.40 
  -1   7   3  823.42   31.50 
   1  -7  -3  799.12   34.40 
  -1  -7   3  836.22   33.90 
   1  -7  -3  843.92   36.20 
   1  -7  -3  829.52   32.30 
  -1  -7   3  808.32   27.60 
   1  -7  -3  808.02   31.90 
   1  -7  -3  789.52   31.60 
  -1  -7   3  797.72   30.90 
  -1   7   2  176.58   13.90 
  -1   7   2  179.28   13.80 
  -1   7   2  167.58   14.90 
  -1   7   2  171.78   10.90 
   1   7  -2  150.38   12.10 
  -1   7   2  163.08    6.20 
  -1   7   2  160.78   10.80 
   1   7  -2  166.68   10.30 
  -1   7   2  164.18   10.90 
  -1   7   2  140.29    8.30 
   1  -7  -2  177.58   14.60 
  -1  -7   2  160.88    6.30 
  -1  -7   2  166.98    6.30 
   1  -7  -2  167.08   14.40 
   1  -7  -2  167.88   11.50 
   1  -7  -2  163.68   11.20 
  -1  -7   2  167.68   12.60 
  -1  -7   2  171.98   10.10 
   1  -7  -2  152.68   10.90 
  -1  -7   2  157.68   11.60 
  -1  -7   2  155.48    7.60 
  -1   7   1  225.68   11.70 
  -1   7   1  213.48   12.10 
  -1   7   1  240.98   14.20 
   1   7  -1  222.28   11.40 
  -1   7   1  234.68   12.40 
   1   7  -1  215.38   15.40 
  -1   7   1  216.88    9.20 
  -1   7   1  210.28   15.00 
  -1  -7   1  217.78    9.50 
  -1  -7   1  231.78   13.90 
  -1  -7   1  222.78    9.30 
   1  -7  -1  222.08   10.80 
   1  -7  -1  213.78   12.40 
   1  -7  -1  234.08   14.80 
  -1  -7   1  228.28   10.30 
   1  -7  -1  231.88   16.00 
   1  -7  -1  213.58   12.00 
   1  -7  -1  220.58   12.50 
  -1  -7   1  220.68   11.00 
   1  -7  -1  238.68   14.40 
  -1  -7   1  202.88   14.10 
  -1   7   0  174.48   13.70 
   1   7   0  174.58   14.00 
   1   7   0  183.48   13.30 
   1   7   0  178.28    8.00 
  -1   7   0  195.88   10.10 
  -1   7   0  179.48   10.70 
  -1   7   0  186.48    9.00 
   1   7   0  181.68    7.90 
   1   7   0  179.38    9.00 
  -1   7   0  171.58    9.70 
  -1   7   0  169.58    9.70 
   1  -7   0  199.38   14.80 
  -1  -7   0  201.98   13.50 
   1  -7   0  168.18    9.90 
   1  -7   0  179.58   12.70 
  -1  -7   0  163.68    9.10 
  -1  -7   0  169.48    8.90 
   1  -7   0  170.78   10.90 
  -1  -7   0  166.68    9.10 
  -1  -7   0  160.78    9.20 
   1  -7   0  173.68   11.70 
   1  -7   0  179.78   11.40 
   1   7   1   35.80    6.60 
   1   7   1   49.10    9.70 
  -1   7  -1   43.60    5.00 
   1   7   1   47.10    5.70 
  -1   7  -1   46.50    4.90 
   1   7   1   42.30    5.60 
   1   7   1   49.30    5.80 
  -1   7  -1   55.69    9.60 
  -1   7  -1   48.60    6.30 
   1  -7   1   33.80    4.20 
  -1  -7  -1   50.99    4.70 
  -1  -7  -1   50.09    5.00 
  -1  -7  -1   59.99    6.70 
  -1  -7  -1   52.09    6.60 
   1  -7   1   40.00    5.70 
   1  -7   1   51.09    8.20 
   1  -7   1   46.20    6.20 
  -1  -7  -1   31.70    6.30 
  -1  -7  -1   29.30    5.40 
   1   7   2   10.70    5.50 
  -1   7  -2   15.10    5.80 
   1   7   2   18.00    6.00 
   1   7   2   12.60    6.80 
   1   7   2   18.00    5.20 
   1   7   2    9.20    5.50 
   1   7   2    4.50    4.50 
  -1   7  -2   16.10    7.10 
  -1   7  -2   13.30    3.10 
  -1   7  -2   12.80    3.50 
   1  -7   2   10.50    5.00 
  -1  -7  -2   17.10    5.50 
   1  -7   2    7.90    3.00 
   1  -7   2   14.10    4.30 
  -1  -7  -2   13.10    2.50 
   1  -7   2   12.50    4.70 
  -1  -7  -2   11.20    5.70 
  -1  -7  -2   12.10    6.10 
   1  -7   2    5.30    4.20 
  -1  -7  -2   11.60    4.90 
  -1   7  -3 1566.94   59.69 
  -1   7  -3 1616.84   53.79 
   1   7   3 1610.44   57.29 
   1   7   3 1679.43   59.59 
  -1   7  -3 1597.24   57.19 
   1   7   3 1615.44   55.09 
   1   7   3 1582.74   57.39 
   1   7   3 1769.92   63.59 
   1  -7   3 1649.73   55.29 
  -1  -7  -3 1590.34   57.69 
  -1  -7  -3 1617.74   57.69 
   1  -7   3 1617.14   57.19 
  -1  -7  -3 1634.24   58.79 
  -1  -7  -3 1668.03   63.39 
   1  -7   3 1564.44   55.49 
   1   7   4   15.50    3.70 
  -1   7  -4   14.10    3.00 
  -1   7  -4    7.70    3.30 
   1   7   4   15.60    6.20 
   1   7   4   -1.90    4.90 
   1   7   4   19.30    6.70 
  -1   7  -4   16.60    7.20 
   1   7   4   15.40    7.00 
   1  -7   4   17.80    4.80 
  -1  -7  -4   16.20    7.80 
  -1  -7  -4   14.10    5.20 
   1  -7   4   20.60    6.70 
   1  -7   4   14.70    5.00 
  -1  -7  -4   15.80    7.60 
  -1  -7  -4   13.20    2.80 
  -1  -7  -4   20.60    7.00 
   1  -7   4   -1.80    4.50 
   1   7   5 1195.68   46.20 
   1   7   5 1244.18   52.99 
   1   7   5 1239.58   48.50 
  -1   7  -5 1165.68   40.70 
   1   7   5 1193.68   45.70 
  -1   7  -5 1262.57   42.40 
   1   7   5 1280.37   46.10 
  -1   7  -5 1199.08   45.70 
  -1  -7  -5 1149.58   45.90 
  -1  -7  -5 1171.38   47.00 
  -1  -7  -5 1226.58   53.49 
   1  -7   5 1209.48   45.70 
  -1  -7  -5 1210.48   46.50 
  -1  -7  -5 1174.18   41.00 
   1  -7   5 1193.08   43.00 
   1  -7   5 1246.68   43.40 
   1   7   6  317.67   19.00 
  -1   7  -6  321.97   13.10 
   1   7   6  334.17   22.50 
   1   7   6  312.77   25.20 
  -1   7  -6  326.77   18.50 
  -1   7  -6  343.17   15.00 
   1   7   6  303.87   19.40 
   1   7   6  302.37   18.00 
  -1  -7  -6  296.57   13.50 
  -1  -7  -6  313.77   18.60 
   1  -7   6  328.67   16.00 
   1  -7   6  328.47   15.60 
  -1  -7  -6  294.17   25.80 
  -1  -7  -6  300.17   19.00 
   1  -7   6  338.27   18.50 
   1  -7   6  331.87   20.00 
  -1  -7  -6  317.57   20.00 
  -1   7  -7  298.47   18.70 
   1   7   7  353.46   24.10 
   1   7   7  293.27   19.40 
  -1   7  -7  297.77   13.40 
  -1  -7  -7  302.87   14.30 
  -1  -7  -7  316.87   20.70 
   1  -7   7  316.37   16.10 
  -1  -7  -7  327.67   25.40 
   1  -7   7  317.27   16.70 
  -1  -7  -7  308.77   19.60 
  -1  -7  -7  332.27   18.80 
   1  -7   7  323.37   20.70 
  -1   7  -8   49.10    5.90 
   1   7   8   30.30    9.10 
   1   7   8   75.39   11.90 
  -1   7  -8   63.99   11.40 
  -1  -7  -8   58.79    7.30 
  -1  -7  -8   40.80   11.40 
  -1  -7  -8   75.79   10.90 
  -1  -7  -8   71.69   10.80 
   1  -7   8   48.60    8.40 
   1  -7   8   57.89    8.50 
  -1  -7  -8   42.20    8.40 
   1  -7   8   35.60    8.40 
  -1   7  -9  273.07   13.60 
  -1   7  -9  269.67   17.70 
   1   7   9  292.17   20.40 
   1   7   9  267.87   24.60 
  -1  -7  -9  258.47   24.90 
  -1  -7  -9  285.27   20.20 
  -1  -7  -9  268.87   14.80 
  -1  -7  -9  282.17   19.80 
   1  -7   9  254.27   16.90 
   1  -7   9  284.57   23.60 
   1   7  10   32.10   11.20 
   1   7  10   22.40   10.40 
  -1   7 -10   16.30    9.80 
  -1   7 -10   25.70    5.60 
  -1  -7 -10   18.30    9.20 
   1  -7  10   24.00   10.00 
  -1  -7 -10   29.80   10.20 
   1  -7  10   33.70    8.90 
  -1  -7 -10   30.60   11.10 
  -1  -7 -10   33.80    7.50 
  -1   7 -11  228.48   19.60 
   1   7  11  269.77   25.00 
   1   7  11  212.98   20.40 
  -1  -7 -11  228.28   20.10 
  -1  -7 -11  242.68   26.70 
   1  -7  11  243.58   18.20 
  -1  -7 -11  239.18   15.30 
   1  -7  11  237.88   26.40 
  -1   7 -12   30.00   12.50 
   1   7  12    8.80   11.50 
   1   7  12   33.10   13.00 
   1  -7  12   44.80   10.80 
  -1  -7 -12   22.50   12.90 
   1  -7  12   33.80   12.60 
  -1  -7 -12   48.40    9.70 
  -1  -7 -12   31.70   12.00 
   1   7  13  230.08   23.20 
  -1   7 -13  241.48   22.00 
   1   7  13  220.18   27.20 
   1  -7  13  246.68   20.70 
  -1  -7 -13  218.98   22.00 
  -1  -7 -13  266.17   34.00 
  -1  -7 -13  229.08   16.90 
   1  -7  13  254.97   29.60 
   1   7  14   13.70   12.50 
  -1   7 -14   34.00   13.90 
   1   7  14    4.80   12.00 
   1  -7  14   10.70   12.00 
  -1  -7 -14   -5.60   12.80 
   1  -7  14    2.50    9.80 
  -1  -7 -14    8.30    9.10 
  -1  -7 -14    9.30   13.40 
   1   7  15   17.40   14.90 
   1   7  15   42.20   15.30 
  -1   7 -15   53.99   13.60 
  -1  -7 -15   24.60   14.10 
  -1  -7 -15   32.70   11.00 
   1  -7  15   57.09   14.50 
   1  -7  15   17.40   14.20 
  -1  -7 -15   34.00   15.30 
   1   7  16  -18.40   13.60 
   1   7  16   -5.80   13.10 
  -1   7 -16   -1.00   12.60 
   1  -7  16    9.20   13.20 
  -1  -7 -16   28.90   13.60 
   1  -7  16   -5.20   13.40 
  -1  -7 -16   14.50   11.00 
   1   7  17   -4.30   14.10 
   1   7  17   43.30   17.30 
  -1   7 -17   33.90   14.80 
  -1  -7 -17   27.30   11.30 
   1  -7  17   45.40   15.70 
   1  -7  17   19.50   15.40 
   1   7  18  -11.10   14.90 
   1   7  18   29.80   19.40 
  -1   7 -18   42.20   16.10 
   1  -7  18   22.70   14.90 
   1  -7  18    5.50   14.70 
   1   7  19  -33.00   18.00 
   1   7  19   -9.70   15.30 
  -1   7 -19    1.20   14.70 
   1  -7  19   20.80   15.50 
   1  -7  19    1.70   15.70 
   1   9 -19    8.80   14.30 
  -1   9  19  -47.30   19.20 
  -1  -9  19    9.10   16.80 
  -1  -9  19    8.90   13.20 
   1   9 -18   63.99   17.80 
  -1   9  18   30.40   17.30 
  -1   9  18  -16.70   17.80 
  -1  -9  18   15.30   13.60 
  -1  -9  18   27.50   17.80 
  -1   9  17    6.40   18.20 
  -1   9  17   53.79   17.90 
   1   9 -17   91.39   19.60 
  -1  -9  17   55.59   14.90 
  -1  -9  17   44.60   18.50 
   1   9 -16   51.49   16.40 
  -1   9  16   33.10   15.30 
  -1   9  16    5.50   16.40 
   1  -9 -16   33.10   14.40 
  -1  -9  16   31.70   12.40 
  -1  -9  16   19.30   15.40 
  -1   9  15   49.00   16.70 
   1   9 -15   57.09   16.70 
  -1   9  15   25.70   16.20 
   1  -9 -15   31.10    9.80 
  -1  -9  15   42.50   12.20 
  -1  -9  15   35.70   15.20 
  -1   9  14   30.10   16.30 
   1   9 -14   65.69   16.40 
  -1   9  14   66.69   16.80 
  -1  -9  14   44.80   15.40 
   1  -9 -14   62.29   10.70 
  -1  -9  14   59.59   12.70 
   1  -9 -14   69.49   16.60 
  -1   9  13   37.50   15.50 
   1   9 -13   68.09   15.90 
  -1   9  13   86.89   16.60 
   1  -9 -13   79.29   10.60 
  -1  -9  13   56.39   15.50 
   1  -9 -13   64.49   15.20 
  -1  -9  13   87.89   12.60 
   1   9 -12   29.30   12.50 
  -1   9  12    6.20   12.80 
  -1   9  12   19.50   12.50 
  -1  -9  12   21.50    9.10 
   1  -9 -12    2.20   11.60 
   1  -9 -12    4.70   11.40 
   1  -9 -12   18.20    7.80 
  -1  -9  12   19.20   11.90 
   1   9 -11  155.08   18.70 
  -1   9  11  102.39   16.30 
  -1   9  11  113.29   17.40 
  -1  -9  11  115.89   17.00 
   1  -9 -11   89.79   17.00 
   1  -9 -11  131.89   11.30 
  -1  -9  11  161.88   14.20 
   1  -9 -11  131.29   17.40 
   1  -9 -11  183.98   20.00 
   1   9 -10   52.49   11.20 
  -1   9  10   37.10   12.50 
  -1   9  10   72.29   13.60 
   1  -9 -10   48.70   12.80 
   1  -9 -10   35.20   12.20 
   1  -9 -10   45.70   11.80 
  -1  -9  10   28.60   11.20 
   1  -9 -10   50.59   12.30 
  -1  -9  10   67.69    9.60 
   1  -9 -10   64.69    7.90 
  -1   9   9  132.19   17.40 
   1   9  -9  173.98   17.50 
  -1   9   9  165.88   17.00 
  -1  -9   9  190.28   12.80 
   1  -9  -9  121.79   16.90 
   1  -9  -9  144.19   16.80 
   1  -9  -9  150.48    9.90 
   1  -9  -9  146.69   16.60 
  -1  -9   9  165.88   11.80 
  -1  -9   9  117.19   16.20 
   1  -9  -9  173.88   16.30 
  -1   9   8  177.88   16.40 
   1   9  -8  158.48   16.10 
   1   9  -8  170.58    8.60 
  -1   9   8  215.18   24.30 
   1  -9  -8  160.78   15.30 
   1  -9  -8  165.68   16.10 
  -1  -9   8  172.18   11.70 
  -1  -9   8  175.58   11.10 
   1  -9  -8  159.58    9.40 
   1  -9  -8  175.48   22.90 
   1  -9  -8  172.78   16.90 
   1   9  -7  178.58   15.40 
  -1   9   7  204.88   16.80 
  -1   9   7  219.18   21.70 
  -1  -9   7  217.98   12.10 
   1  -9  -7  216.78   23.00 
   1  -9  -7  201.08   16.10 
  -1  -9   7  210.28   11.40 
   1  -9  -7  209.58   17.20 
   1  -9  -7  205.18   16.70 
  -1   9   6   20.90    8.60 
  -1   9   6    4.00    7.70 
  -1   9   6   10.20    9.40 
  -1   9   6    7.10    3.60 
   1   9  -6   -6.40    7.20 
   1  -9  -6    7.60    7.30 
   1  -9  -6    8.10    8.00 
  -1  -9   6    9.30    4.00 
   1  -9  -6    0.50    7.80 
  -1  -9   6   16.40    4.50 
   1  -9  -6    6.10    6.20 
   1  -9  -6   14.30    8.80 
  -1   9   5  669.33   35.20 
  -1   9   5  635.64   29.20 
   1   9  -5  672.73   28.90 
  -1   9   5  648.34   29.00 
  -1   9   5  678.73   36.30 
  -1   9   5  656.33   26.50 
  -1   9   5  666.63   29.50 
   1  -9  -5  631.64   32.20 
  -1  -9   5  642.14   24.20 
   1  -9  -5  669.83   29.90 
   1  -9  -5  690.93   35.50 
   1  -9  -5  670.83   30.20 
   1  -9  -5  702.53   29.80 
  -1  -9   5  646.44   23.60 
  -1  -9   5  679.63   28.70 
  -1   9   4 2144.89   74.89 
  -1   9   4 2072.69   70.79 
  -1   9   4 2026.00   77.29 
   1   9  -4 2128.69   74.19 
  -1   9   4 2131.49   74.69 
  -1   9   4 2116.89   79.39 
   1   9  -4 2070.39   77.69 
  -1   9   4 2013.50   74.19 
  -1  -9   4 2119.49   73.99 
   1  -9  -4 2118.79   80.09 
   1  -9  -4 2061.19   74.79 
   1  -9  -4 2021.50   75.09 
  -1  -9   4 2108.19   69.29 
   1  -9  -4 2147.59   75.29 
  -1  -9   4 2265.47   70.19 
   1  -9  -4 2073.49   78.09 
  -1  -9   4 2166.68   77.69 
  -1   9   3  245.38   19.10 
   1   9  -3  247.28   18.30 
  -1   9   3  242.28   19.40 
  -1   9   3  252.27   10.00 
  -1   9   3  253.17   15.60 
  -1   9   3  255.17   18.10 
  -1   9   3  242.68   15.40 
   1   9  -3  251.87   14.30 
   1  -9  -3  241.78   15.10 
   1  -9  -3  259.47   18.60 
  -1  -9   3  260.17   16.60 
   1  -9  -3  270.17   19.20 
  -1  -9   3  252.57   13.90 
  -1  -9   3  244.98   10.90 
   1  -9  -3  251.27   15.60 
   1  -9  -3  256.47   15.10 
  -1  -9   3  249.18   17.40 
  -1  -9   3  250.37   10.00 
  -1   9   2  658.83   32.00 
  -1   9   2  604.54   29.60 
   1   9  -2  637.54   25.90 
  -1   9   2  659.63   21.90 
  -1   9   2  684.23   30.50 
  -1   9   2  642.44   26.30 
  -1   9   2  646.04   26.50 
   1   9  -2  722.93   31.10 
  -1  -9   2  653.73   23.10 
  -1  -9   2  626.24   28.50 
   1  -9  -2  642.54   30.10 
   1  -9  -2  624.84   30.60 
   1  -9  -2  613.54   26.50 
  -1  -9   2  634.24   23.60 
  -1  -9   2  648.94   22.90 
   1  -9  -2  635.24   27.10 
  -1  -9   2  653.83   29.60 
  -1  -9   2  673.73   26.00 
   1  -9  -2  634.74   28.90 
  -1   9   1 1398.46   49.10 
  -1   9   1 1414.56   49.20 
  -1   9   1 1349.47   46.60 
  -1   9   1 1457.15   51.99 
  -1   9   1 1308.87   52.99 
   1   9  -1 1438.06   53.89 
   1   9  -1 1390.16   48.50 
  -1  -9   1 1419.56   47.30 
  -1  -9   1 1420.26   47.90 
   1  -9  -1 1476.75   48.10 
  -1  -9   1 1330.17   48.40 
   1  -9  -1 1399.16   49.80 
   1  -9  -1 1374.06   49.99 
  -1  -9   1 1308.47   47.50 
  -1  -9   1 1373.96   52.49 
   1  -9  -1 1433.36   52.19 
   1  -9  -1 1333.47   52.49 
   1  -9  -1 1428.16   54.29 
   1  -9  -1 1328.17   49.50 
  -1  -9   1 1357.56   47.40 
   1   9   0  149.39    7.20 
  -1   9   0  146.89   12.50 
  -1   9   0  127.89    9.10 
   1   9   0  135.99   12.00 
  -1   9   0  124.79    9.20 
  -1   9   0  146.89   10.70 
  -1   9   0  136.39    9.40 
   1   9   0  151.08    8.50 
   1   9   0  134.69   14.20 
  -1   9   0  137.69    8.60 
   1   9   0  146.49    7.30 
   1  -9   0  106.29   10.70 
   1  -9   0  148.09    9.60 
   1  -9   0  132.19   11.50 
  -1  -9   0  129.49    9.30 
  -1  -9   0  146.09    9.70 
  -1  -9   0  157.18   13.60 
  -1  -9   0  135.29    8.70 
  -1  -9   0  161.58    9.70 
   1  -9   0  144.49   14.30 
   1  -9   0  125.49   10.50 
   1  -9   0  135.49   11.10 
  -1  -9   0  159.28    8.70 
  -1   9  -1  809.22   28.60 
  -1   9  -1  814.12   29.70 
   1   9   1  766.92   33.90 
  -1   9  -1  810.02   34.60 
   1   9   1  769.62   34.50 
  -1   9  -1  816.32   28.50 
   1   9   1  771.32   29.00 
   1   9   1  785.52   29.00 
  -1  -9  -1  826.72   33.80 
  -1  -9  -1  782.82   28.10 
  -1  -9  -1  763.72   30.20 
   1  -9   1  807.52   30.20 
   1  -9   1  779.42   33.80 
   1  -9   1  806.02   29.80 
   1  -9   1  807.62   33.30 
   1  -9   1  855.91   31.00 
  -1  -9  -1  783.22   34.90 
  -1  -9  -1  762.62   27.80 
  -1  -9  -1  769.52   30.30 
   1   9   2  286.07   14.30 
  -1   9  -2  252.17   12.20 
   1   9   2  281.47   17.60 
  -1   9  -2  235.28   18.10 
  -1   9  -2  267.07   11.20 
   1   9   2  276.87   14.20 
  -1   9  -2  274.47   11.30 
  -1   9  -2  264.97   14.00 
   1   9   2  286.37   18.80 
   1   9   2  290.77   14.90 
  -1  -9  -2  276.67   14.90 
  -1  -9  -2  267.47   14.60 
   1  -9   2  273.57   14.10 
  -1  -9  -2  288.77   17.90 
  -1  -9  -2  281.97   10.70 
   1  -9   2  278.27   16.70 
   1  -9   2  293.47   13.80 
   1  -9   2  268.37   13.00 
   1  -9   2  270.17   14.30 
  -1  -9  -2  318.67   20.50 
   1   9   3  146.49   11.30 
  -1   9  -3  153.68   15.20 
  -1   9  -3  157.78    6.00 
   1   9   3  155.88   15.90 
   1   9   3  142.39   12.00 
  -1   9  -3  142.59   11.20 
  -1   9  -3  154.58    6.00 
   1   9   3  147.49   14.90 
  -1   9  -3  164.48    8.80 
   1   9   3  140.89   11.10 
   1  -9   3  150.88   10.70 
  -1  -9  -3  169.08   19.20 
   1  -9   3  165.88    9.70 
   1  -9   3  158.88   11.00 
   1  -9   3  151.48   14.00 
  -1  -9  -3  143.69    5.80 
  -1  -9  -3  146.39   11.60 
  -1  -9  -3  138.79   13.00 
   1  -9   3  162.38    9.90 
  -1  -9  -3  152.98   13.00 
   1   9   4  741.83   33.80 
   1   9   4  723.83   27.30 
   1   9   4  754.52   35.40 
   1   9   4  788.82   37.90 
  -1   9  -4  746.23   30.90 
   1   9   4  774.02   31.40 
  -1   9  -4  742.43   27.30 
  -1   9  -4  720.23   33.60 
   1  -9   4  767.12   28.30 
  -1  -9  -4  785.52   38.80 
  -1  -9  -4  748.33   24.60 
  -1  -9  -4  767.02   31.50 
   1  -9   4  759.02   28.70 
  -1  -9  -4  731.23   33.00 
  -1  -9  -4  762.52   31.80 
   1  -9   4  752.82   33.60 
   1  -9   4  745.23   30.70 
   1   9   5   76.09   10.60 
   1   9   5   73.29    9.80 
   1   9   5   53.79    9.10 
   1   9   5   49.50   10.20 
   1   9   5   71.19    9.80 
  -1   9  -5   98.19   11.30 
  -1  -9  -5   66.89   10.50 
  -1  -9  -5   54.99    8.20 
   1  -9   5   91.59   10.80 
  -1  -9  -5   68.59    9.90 
  -1  -9  -5   67.69    4.10 
   1  -9   5   91.29    8.20 
   1  -9   5   88.09    8.30 
  -1  -9  -5   47.50   11.00 
  -1   9  -6  327.67   19.00 
   1   9   6  339.97   19.30 
   1   9   6  336.67   22.60 
   1   9   6  270.97   17.60 
   1   9   6  327.47   19.50 
  -1  -9  -6  350.46   27.90 
  -1  -9  -6  315.87   20.60 
  -1  -9  -6  335.27   20.10 
   1  -9   6  332.07   15.60 
  -1  -9  -6  312.77   12.60 
   1  -9   6  317.57   16.00 
  -1  -9  -6  318.97   19.20 
  -1   9  -7  332.17   19.80 
   1   9   7  301.27   19.90 
   1   9   7  331.17   20.00 
   1   9   7  310.07   24.30 
  -1  -9  -7  313.37   28.30 
   1  -9   7  330.57   16.50 
   1  -9   7  334.27   16.60 
  -1  -9  -7  276.27   19.90 
   1  -9   7  355.76   21.70 
  -1  -9  -7  288.87   13.20 
  -1  -9  -7  332.17   20.20 
  -1  -9  -7  276.07   20.60 
  -1   9  -8  310.37   20.20 
   1   9   8  302.77   20.20 
   1   9   8  297.87   20.60 
   1   9   8  327.17   25.90 
   1  -9   8  287.97   16.80 
  -1  -9  -8  311.17   14.00 
   1  -9   8  316.37   21.90 
   1  -9   8  299.47   16.50 
  -1  -9  -8  316.47   20.40 
  -1  -9  -8  267.97   28.00 
  -1  -9  -8  305.67   21.00 
  -1  -9  -8  301.87   21.10 
  -1   9  -9  110.29   15.10 
   1   9   9   79.29   13.10 
   1   9   9  101.89   14.30 
   1   9   9  128.69   16.10 
  -1  -9  -9  105.79   14.10 
   1  -9   9   93.39   12.10 
  -1  -9  -9  121.09   15.50 
  -1  -9  -9   85.79    8.30 
  -1  -9  -9   66.29   14.50 
   1  -9   9  137.99   12.40 
   1   9  10   53.59    9.20 
  -1   9 -10   61.69   13.70 
   1   9  10   81.59   13.00 
   1   9  10   59.89   13.50 
   1  -9  10   74.09   11.30 
  -1  -9 -10   70.49   13.30 
  -1  -9 -10   67.09    8.50 
  -1  -9 -10   52.69   14.50 
  -1  -9 -10   71.29   13.60 
  -1   9 -11  335.27   23.50 
   1   9  11  289.77   22.30 
   1   9  11  299.97   30.20 
   1  -9  11  342.87   20.90 
  -1  -9 -11  300.17   16.70 
  -1  -9 -11  341.47   34.60 
  -1  -9 -11  285.17   23.40 
   1  -9  11  363.26   31.20 
  -1   9 -12  391.56   27.40 
   1   9  12  475.65   37.00 
   1   9  12  447.46   29.50 
   1  -9  12  419.06   36.00 
  -1  -9 -12  433.46   28.70 
  -1  -9 -12  481.35   41.30 
  -1  -9 -12  437.16   21.80 
   1  -9  12  447.96   25.40 
  -1   9 -13  103.89   17.60 
   1   9  13   78.39   16.30 
   1   9  13   63.09   16.00 
  -1  -9 -13   67.49   17.50 
   1  -9  13   60.29   16.10 
   1  -9  13   96.59   14.50 
  -1  -9 -13  112.49   12.10 
  -1  -9 -13   80.79   16.70 
   1   9  14   31.00   16.10 
  -1   9 -14   77.09   17.10 
   1   9  14   79.69   17.60 
   1  -9  14   55.29   13.10 
  -1  -9 -14   60.59   16.00 
   1  -9  14   50.49   16.00 
  -1  -9 -14   53.39   15.30 
  -1  -9 -14   77.29   11.80 
   1   9  15   -2.40   15.40 
   1   9  15   13.10   14.30 
  -1   9 -15   25.50   14.30 
   1  -9  15   12.80   11.90 
  -1  -9 -15   26.30   10.10 
   1  -9  15   17.60   14.40 
  -1  -9 -15   14.30   14.80 
  -1  -9 -15    4.70   12.80 
   1   9  16   27.10   15.50 
  -1   9 -16    5.90   13.70 
   1   9  16  -14.20   15.10 
   1  -9  16   14.20   14.30 
  -1  -9 -16   18.00   11.20 
  -1  -9 -16   15.50   13.70 
   1  -9  16   19.00   12.60 
  -1   9 -17   21.00   15.40 
   1   9  17   29.60   17.50 
   1   9  17  -16.40   14.70 
   1  -9  17   15.90   12.20 
   1  -9  17    2.50   14.50 
   1   9  18  -21.30   15.70 
  -1   9 -18    7.70   13.70 
   1  -9  18   15.30   13.40 
   1  -9  18   -7.10   14.40 
   1   9  19  -33.10   19.00 
  -1   9 -19   34.80   17.30 
   1  -9  19   13.70   17.70 
   1  -9  19   11.40   14.20 
   1  11 -18   28.10   15.70 
  -1 -11  18   30.80   18.60 
  -1 -11  18   31.80   13.60 
   1  11 -17   29.50   15.60 
  -1  11  17  -34.80   16.70 
  -1 -11  17    5.10   15.00 
  -1 -11  17   13.60   11.70 
   1  11 -16   81.49   18.20 
  -1  11  16   58.99   18.70 
  -1  11  16   42.40   19.90 
  -1 -11  16   39.20   16.70 
  -1 -11  16   70.79   14.50 
   1  11 -15   31.30   15.40 
  -1  11  15    8.60   15.20 
  -1  11  15  -30.60   16.50 
  -1 -11  15   11.80   10.00 
  -1 -11  15    8.20   13.50 
  -1  11  14  102.59   19.00 
   1  11 -14  107.09   18.40 
  -1  11  14   59.99   18.50 
   1 -11 -14  130.39   23.40 
  -1 -11  14   80.39   18.60 
  -1 -11  14  113.59   15.00 
  -1  11  13    6.50   12.10 
   1  11 -13   23.60   13.40 
  -1  11  13    7.10   15.90 
   1 -11 -13   15.10   13.30 
  -1 -11  13    5.40   12.60 
  -1 -11  13   26.90    9.90 
   1 -11 -13  -13.30   10.60 
   1  11 -12  437.16   27.40 
  -1  11  12  469.45   31.10 
  -1  11  12  480.05   40.80 
  -1 -11  12  483.05   38.90 
   1 -11 -12  475.65   31.00 
  -1 -11  12  470.65   24.80 
   1 -11 -12  468.55   41.00 
   1  11 -11    4.90   11.70 
  -1  11  11    7.30   13.60 
  -1  11  11   12.10   11.70 
  -1 -11  11   10.90   11.10 
  -1 -11  11    6.90    7.50 
   1 -11 -11   10.80   11.80 
   1 -11 -11    8.40   11.50 
  -1  11  10  673.03   34.50 
  -1  11  10  666.53   41.10 
   1  11 -10  587.54   31.30 
   1 -11 -10  648.34   34.20 
   1 -11 -10  612.04   33.20 
  -1 -11  10  583.24   27.50 
   1 -11 -10  630.84   34.40 
  -1 -11  10  696.53   42.00 
   1 -11 -10  632.74   43.40 
  -1  11   9    5.80   10.50 
  -1  11   9    4.10    9.90 
   1  11  -9    9.20   10.40 
   1 -11  -9    7.80   10.00 
   1 -11  -9    9.30    8.80 
  -1 -11   9   10.50    6.10 
  -1 -11   9    6.50    5.90 
   1 -11  -9    2.00    9.20 
   1 -11  -9   16.30   10.60 
  -1  11   8  284.27   20.70 
  -1  11   8  280.67   18.40 
   1  11  -8  283.07   20.10 
  -1  11   8  285.37   26.50 
  -1 -11   8  276.27   14.80 
   1 -11  -8  275.67   21.00 
  -1 -11   8  287.97   14.60 
   1 -11  -8  275.17   20.60 
   1 -11  -8  284.47   20.20 
   1 -11  -8  332.17   28.80 
  -1  11   7   11.30    9.60 
   1  11  -7    6.60    9.00 
  -1  11   7   20.70    9.20 
  -1  11   7    8.80    3.80 
  -1 -11   7   12.60    4.60 
   1 -11  -7    7.00    9.30 
  -1 -11   7   12.10    4.90 
   1 -11  -7    2.60    8.50 
   1 -11  -7    2.00    8.00 
   1 -11  -7   22.20    9.00 
  -1  11   6  422.26   28.30 
  -1  11   6  399.96   18.40 
  -1  11   6  385.36   22.30 
  -1  11   6  402.26   22.50 
   1  11  -6  420.06   22.20 
  -1  11   6  374.96   25.90 
   1 -11  -6  376.26   22.80 
  -1 -11   6  417.56   17.10 
  -1 -11   6  419.56   16.60 
   1 -11  -6  410.96   22.60 
   1 -11  -6  402.66   28.80 
   1 -11  -6  354.06   22.60 
   1  11  -5   39.80    9.10 
  -1  11   5   19.10    8.70 
  -1  11   5   34.80    8.90 
  -1  11   5   19.70    8.20 
  -1  11   5   32.90    9.30 
  -1  11   5   20.60    2.80 
  -1  11   5   31.40   11.80 
   1  11  -5   31.70   11.80 
  -1  11   5   36.40    8.50 
   1 -11  -5   21.30    8.40 
   1 -11  -5   33.50    8.90 
  -1 -11   5   30.20    4.40 
   1 -11  -5   33.00    9.40 
   1 -11  -5   21.40    8.20 
   1 -11  -5   22.40    9.20 
  -1 -11   5   29.10    4.90 
  -1  11   4  559.54   25.30 
   1  11  -4  508.25   27.60 
  -1  11   4  518.65   27.80 
   1  11  -4  511.75   24.20 
  -1  11   4  524.55   24.90 
  -1  11   4  524.25   25.00 
  -1  11   4  558.94   31.60 
  -1  11   4  559.24   31.30 
   1 -11  -4  511.65   25.60 
   1 -11  -4  536.95   25.40 
   1 -11  -4  505.05   28.90 
  -1 -11   4  538.25   19.80 
  -1 -11   4  527.35   26.70 
   1 -11  -4  541.55   30.50 
  -1 -11   4  536.75   20.50 
  -1 -11   4  525.45   24.00 
   1 -11  -4  529.35   25.70 
   1  11  -3  332.27   21.90 
  -1  11   3  305.37   22.40 
  -1  11   3  319.87   17.80 
  -1  11   3  318.07   21.70 
   1  11  -3  292.07   16.40 
  -1 -11   3  300.07   12.90 
  -1 -11   3  302.47   13.70 
  -1 -11   3  313.87   16.80 
   1 -11  -3  356.96   23.50 
   1 -11  -3  302.07   17.50 
   1 -11  -3  288.47   17.90 
  -1 -11   3  320.97   19.50 
   1 -11  -3  323.47   23.40 
  -1  11   2  672.83   30.60 
   1  11  -2  601.44   25.70 
  -1  11   2  634.64   26.00 
  -1  11   2  586.34   25.90 
   1  11  -2  589.54   31.10 
  -1  11   2  629.74   31.10 
  -1  11   2  618.44   21.60 
  -1 -11   2  620.64   23.30 
   1 -11  -2  623.24   30.90 
  -1 -11   2  652.13   29.60 
  -1 -11   2  609.54   25.30 
   1 -11  -2  622.84   30.70 
  -1 -11   2  611.44   23.90 
   1 -11  -2  591.14   26.50 
   1 -11  -2  631.24   27.30 
  -1 -11   2  599.94   23.30 
   1 -11  -2  678.43   32.30 
   1  11  -1   91.09   12.90 
  -1  11   1  103.79   14.10 
  -1  11   1  111.79    9.50 
  -1  11   1  103.59   11.50 
   1  11  -1   92.29    8.80 
  -1  11   1  100.29    9.40 
  -1  11   1   92.29    6.70 
  -1 -11   1  103.59    8.90 
  -1 -11   1   98.99    8.70 
  -1 -11   1   92.89    8.00 
   1 -11  -1   87.59    9.80 
  -1 -11   1   92.09    7.70 
   1 -11  -1  117.69   11.40 
  -1 -11   1   89.49    8.20 
   1 -11  -1   92.59    8.20 
   1 -11  -1   89.69    9.30 
   1 -11  -1  113.29   13.90 
   1 -11  -1  102.29   13.60 
   1 -11  -1  123.59   14.90 
  -1  11   0  411.06   17.50 
   1  11   0  386.36   23.90 
  -1  11   0  396.06   17.50 
  -1  11   0  405.06   23.90 
   1  11   0  408.06   17.20 
  -1  11   0  413.56   20.10 
  -1  11   0  399.06   17.00 
   1  11   0  413.36   15.50 
   1  11   0  402.26   15.30 
   1  11   0  403.96   22.00 
   1 -11   0  388.56   24.10 
  -1 -11   0  422.76   18.60 
  -1 -11   0  408.56   18.20 
   1 -11   0  438.96   20.30 
   1 -11   0  451.15   23.90 
   1 -11   0  416.36   18.70 
  -1 -11   0  402.76   18.00 
  -1 -11   0  394.66   18.20 
  -1 -11   0  442.16   23.80 
   1 -11   0  394.76   21.20 
   1 -11   0  400.36   19.00 
  -1 -11   0  411.16   17.30 
   1 -11   0  391.56   18.90 
   1  11   1  119.79   13.20 
  -1  11  -1  135.69    8.30 
   1  11   1  146.99    9.20 
   1  11   1  138.99    9.10 
  -1  11  -1  140.39   15.50 
  -1  11  -1  141.99    8.40 
  -1  11  -1  153.18   10.20 
  -1 -11  -1  143.69    8.10 
   1 -11   1  132.89   10.70 
   1 -11   1  157.88   12.20 
  -1 -11  -1  132.89   10.80 
  -1 -11  -1  131.29    8.10 
  -1 -11  -1  157.48   11.10 
   1 -11   1  135.79   14.10 
  -1 -11  -1  152.58   15.20 
   1 -11   1  138.79   10.30 
  -1 -11  -1  128.99   13.60 
  -1 -11  -1  134.79   11.00 
   1 -11   1  148.59   13.50 
  -1  11  -2  294.07   20.50 
   1  11   2  295.17   15.20 
   1  11   2  283.47   15.50 
  -1  11  -2  288.87   11.60 
   1  11   2  296.67   15.20 
  -1  11  -2  290.67   15.50 
  -1  11  -2  283.47   11.40 
   1  11   2  303.27   20.90 
  -1 -11  -2  312.87   22.90 
  -1 -11  -2  275.57   18.80 
  -1 -11  -2  304.87   16.80 
   1 -11   2  312.27   15.10 
   1 -11   2  308.67   16.20 
   1 -11   2  290.07   14.40 
   1 -11   2  309.37   20.30 
  -1 -11  -2  279.17   11.60 
  -1 -11  -2  285.77   15.80 
   1  11   3  105.29   10.70 
   1  11   3  133.99   16.20 
  -1  11  -3  120.89   15.60 
  -1  11  -3  123.59   11.70 
   1  11   3  120.09   10.20 
   1  11   3  106.09   10.30 
   1  11   3   94.99   11.70 
   1 -11   3  112.79    9.00 
   1 -11   3  104.09   10.50 
   1 -11   3  102.69    9.10 
  -1 -11  -3  116.59   13.70 
  -1 -11  -3   91.09   12.20 
  -1 -11  -3  124.99   12.40 
  -1 -11  -3  115.19   11.70 
   1 -11   3  106.69   10.20 
   1  11   4  539.35   25.20 
   1  11   4  574.74   29.60 
  -1  11  -4  562.44   25.50 
  -1  11  -4  535.55   29.50 
   1  11   4  556.54   29.10 
   1  11   4  521.15   24.90 
   1  11   4  526.05   24.40 
   1  11   4  565.74   32.00 
  -1 -11  -4  556.14   26.10 
  -1 -11  -4  521.85   28.10 
   1 -11   4  512.35   22.60 
   1 -11   4  532.15   22.20 
   1 -11   4  554.14   25.20 
   1 -11   4  575.44   24.80 
  -1 -11  -4  579.54   33.30 
  -1 -11  -4  556.84   25.70 
  -1  11  -5   23.80    8.40 
   1  11   5   27.30    8.10 
   1  11   5   16.40    8.10 
   1  11   5    8.30   10.80 
   1  11   5   23.10    8.10 
   1  11   5   12.30    2.20 
  -1 -11  -5    7.00    6.60 
   1 -11   5   19.30    5.50 
  -1 -11  -5   19.40    9.30 
  -1 -11  -5   22.00    8.60 
   1 -11   5   15.60    5.70 
  -1 -11  -5   18.60    8.60 
   1  11   6  632.64   26.70 
   1  11   6  661.93   33.80 
   1  11   6  614.04   29.80 
  -1  11  -6  639.94   29.50 
   1 -11   6  670.43   26.00 
  -1 -11  -6  611.04   29.80 
  -1 -11  -6  616.84   31.70 
  -1 -11  -6  636.44   38.40 
  -1 -11  -6  629.64   30.60 
   1 -11   6  633.24   26.10 
   1  11   7    1.00    7.70 
   1  11   7   -3.90    7.60 
  -1  11  -7    2.10    9.10 
   1  11   7   -0.80    4.10 
  -1 -11  -7    0.10    6.00 
  -1 -11  -7   10.50    2.50 
   1 -11   7    6.60    5.60 
   1 -11   7    6.10    5.00 
  -1 -11  -7   10.90    9.70 
  -1 -11  -7    7.30    8.00 
  -1 -11  -7    2.60    8.70 
   1 -11   7    9.00    6.10 
  -1  11  -8  223.98   18.60 
   1  11   8  221.58   18.80 
   1  11   8  268.07   18.60 
   1  11   8  213.08   22.50 
  -1 -11  -8  238.88   10.70 
   1 -11   8  260.87   14.80 
  -1 -11  -8  251.07   28.20 
   1 -11   8  245.08   15.40 
  -1 -11  -8  236.98   19.60 
   1 -11   8  271.97   20.00 
  -1 -11  -8  246.98   18.80 
   1  11   9   38.80   12.00 
  -1  11  -9   44.40   12.00 
   1  11   9   51.59   12.30 
  -1 -11  -9   41.20   11.50 
  -1 -11  -9   37.70   13.10 
  -1 -11  -9   53.89    5.80 
   1 -11   9   26.30    8.00 
   1 -11   9   42.10    8.70 
  -1 -11  -9   48.50   10.80 
   1  11  10  198.08   20.10 
   1  11  10  226.58   20.80 
  -1  11 -10  244.98   20.50 
   1  11  10  256.97   28.20 
  -1 -11 -10  230.98   21.00 
  -1 -11 -10  235.18   30.60 
  -1 -11 -10  223.98   20.00 
  -1 -11 -10  218.98   12.20 
   1 -11  10  220.88   16.30 
   1  11  11   15.00   11.90 
   1  11  11   26.30   13.50 
  -1  11 -11   25.30   12.80 
   1  11  11   16.60    7.10 
  -1 -11 -11   21.30   10.30 
  -1 -11 -11   26.10    6.30 
   1 -11  11   19.70    9.30 
  -1 -11 -11   19.10   13.00 
   1  11  12   59.09   15.60 
   1  11  12   30.20   15.30 
  -1  11 -12   92.39   16.70 
  -1 -11 -12   67.99    8.80 
   1 -11  12   72.59   12.40 
  -1 -11 -12   53.99   14.60 
  -1 -11 -12   39.90   15.60 
   1 -11  12   38.70   12.10 
  -1  11 -13   30.80   14.10 
   1  11  13   19.60   15.50 
   1  11  13   30.00   14.00 
  -1 -11 -13   31.00   15.50 
  -1 -11 -13   38.00    8.10 
  -1 -11 -13   33.60   14.00 
   1 -11  13   18.00   13.10 
   1 -11  13   33.80   11.00 
   1  11  14   15.00   14.90 
   1  11  14   38.90   15.20 
  -1  11 -14   51.39   15.20 
  -1 -11 -14   32.20   13.60 
  -1 -11 -14   33.00   14.80 
  -1 -11 -14   28.70   14.90 
  -1 -11 -14   16.10   13.70 
   1 -11  14   18.70   14.00 
   1 -11  14   36.60   11.70 
   1  11  15   14.90   15.70 
   1  11  15  -17.70   15.60 
  -1  11 -15    7.20   13.00 
   1 -11  15   16.40   11.70 
   1 -11  15   17.70   15.20 
  -1 -11 -15   32.20   15.10 
  -1 -11 -15    7.90   14.20 
  -1  11 -16   62.09   18.00 
   1  11  16    7.60   18.60 
  -1 -11 -16   86.59   18.80 
   1 -11  16   71.79   15.30 
  -1 -11 -16   46.20   17.90 
   1 -11  16   21.90   15.80 
  -1  11 -17   13.40   14.50 
   1 -11  17   15.50   12.80 
   1 -11  17   16.70   15.90 
  -1  11 -18   39.80   17.30 
   1 -11  18    3.20   13.60 
   1 -11  18   -0.80   15.10 
  -1  13  18  -54.29   19.30 
   1  13 -18   58.89   18.80 
  -1 -13  18   34.50   13.80 
  -1 -13  18   13.80   17.70 
   1  13 -17   46.00   16.80 
  -1  13  17  -43.00   18.20 
  -1 -13  17   11.30   11.40 
  -1 -13  17   23.90   17.10 
  -1  13  16  -23.80   16.10 
   1  13 -16   21.70   15.30 
  -1 -13  16   24.80   16.10 
  -1 -13  16   -2.50   10.00 
  -1  13  15   13.10   17.00 
   1  13 -15   78.69   18.00 
  -1 -13  15   40.40   17.00 
  -1 -13  15   67.39   13.30 
  -1  13  14   21.80   16.70 
   1  13 -14   48.90   16.30 
  -1  13  14   33.10   10.40 
  -1 -13  14   56.99   11.70 
  -1 -13  14   48.10   16.50 
   1 -13 -14   50.99   16.70 
  -1  13  13   48.40    9.60 
   1  13 -13   80.79   17.40 
  -1  13  13   49.80   18.50 
  -1  13  13   72.69   17.20 
   1 -13 -13  104.69   18.70 
  -1 -13  13   60.09   11.30 
  -1 -13  13   60.09   17.00 
   1 -13 -13   41.30   16.20 
   1  13 -12   62.09   15.40 
  -1  13  12   28.80    7.70 
  -1  13  12   21.70   16.10 
  -1  13  12   58.59   15.30 
  -1 -13  12   49.40   14.60 
  -1 -13  12   55.09   10.50 
   1 -13 -12   39.90   14.60 
   1 -13 -12   37.40   14.10 
   1  13 -11  311.87   23.90 
  -1  13  11  266.87   22.30 
  -1  13  11  308.67   24.80 
  -1 -13  11  268.57   17.70 
  -1 -13  11  321.67   32.20 
   1 -13 -11  325.57   25.70 
   1 -13 -11  307.47   34.60 
  -1  13  10    1.90   13.00 
  -1  13  10   12.90    5.50 
   1  13 -10   26.60   12.10 
  -1  13  10   13.70   11.90 
   1 -13 -10    3.30   10.90 
   1 -13 -10   28.40   11.60 
  -1 -13  10   14.40    7.30 
   1 -13 -10    8.70   10.90 
   1  13  -9  246.48   18.60 
  -1  13   9  224.58   20.70 
  -1  13   9  260.57   17.90 
  -1  13   9  191.08   22.20 
  -1  13   9  271.57   21.20 
  -1 -13   9  214.18   13.90 
  -1 -13   9  252.17   15.00 
   1 -13  -9  265.37   29.30 
   1 -13  -9  263.47   21.00 
   1 -13  -9  283.77   22.20 
  -1  13   8   33.70   12.40 
  -1  13   8   37.50   11.40 
  -1  13   8   26.60    4.80 
  -1  13   8   36.40   15.40 
   1  13  -8   49.60   11.80 
  -1  13   8   26.00    5.00 
  -1  13   8   22.90   11.60 
   1 -13  -8   33.10   11.80 
  -1 -13   8   43.40    6.70 
   1 -13  -8   24.90   11.40 
  -1 -13   8   36.80    6.90 
   1 -13  -8   36.50   10.80 
   1  13  -7  213.68   17.50 
  -1  13   7  209.88   12.70 
  -1  13   7  244.18   18.70 
  -1  13   7  227.48   23.00 
  -1  13   7  229.78   12.60 
  -1  13   7  235.68   18.50 
  -1  13   7  241.88   24.80 
  -1 -13   7  234.38   12.60 
   1 -13  -7  262.57   26.00 
   1 -13  -7  239.58   19.50 
   1 -13  -7  220.78   17.20 
   1 -13  -7  223.88   18.10 
  -1 -13   7  224.28   12.20 
  -1  13   6  240.78   22.30 
  -1  13   6  194.08   16.60 
  -1  13   6  186.78   16.40 
  -1  13   6  183.98   22.00 
   1  13  -6  220.78   16.80 
   1 -13  -6  183.68   22.50 
  -1 -13   6  221.08   11.10 
   1 -13  -6  213.88   17.20 
  -1 -13   6  221.48   11.70 
   1 -13  -6  199.48   17.60 
  -1  13   5  145.89   14.10 
   1  13  -5  165.28   16.70 
  -1  13   5  162.68   20.00 
  -1  13   5  168.58   20.10 
   1  13  -5  162.38   15.20 
  -1  13   5  161.68   14.60 
   1 -13  -5  171.98   20.30 
  -1 -13   5  148.39    9.80 
  -1 -13   5  170.28   16.00 
  -1 -13   5  171.28    9.30 
   1 -13  -5  153.88   15.50 
   1 -13  -5  154.88   15.40 
  -1  13   4   49.99   10.50 
  -1  13   4   55.09    9.90 
  -1  13   4   60.09    9.60 
   1  13  -4   91.79   11.70 
   1  13  -4   75.49   15.10 
  -1  13   4   45.10    9.30 
  -1  13   4   86.39   15.20 
   1 -13  -4   77.89   11.00 
  -1 -13   4   55.39    8.30 
   1 -13  -4   60.09   10.40 
  -1 -13   4   84.89    7.50 
  -1 -13   4   70.29    6.40 
   1 -13  -4   80.99   12.00 
   1  13  -3  465.65   27.60 
   1  13  -3  470.95   21.40 
  -1  13   3  403.56   20.80 
  -1  13   3  417.56   26.30 
  -1  13   3  443.96   21.10 
  -1  13   3  396.26   24.80 
  -1 -13   3  452.55   18.70 
   1 -13  -3  404.46   22.60 
   1 -13  -3  426.56   27.40 
  -1 -13   3  445.06   21.20 
   1 -13  -3  420.46   22.10 
  -1 -13   3  453.55   24.50 
  -1 -13   3  440.66   18.00 
  -1  13   2  264.97   15.50 
  -1  13   2  242.78   14.50 
   1  13  -2  264.67   15.30 
  -1  13   2  276.47   11.00 
   1  13  -2  235.68   21.00 
  -1  13   2  226.18   20.10 
   1 -13  -2  271.17   17.10 
   1 -13  -2  250.97   16.00 
  -1 -13   2  281.17   13.30 
   1 -13  -2  316.47   21.60 
  -1 -13   2  292.07   14.30 
  -1 -13   2  255.97   13.40 
  -1 -13   2  282.07   15.20 
  -1 -13   2  290.67   19.20 
  -1  13   1  220.78   19.20 
   1  13  -1  204.68   19.20 
   1  13  -1  223.48   12.70 
  -1  13   1  222.68   16.00 
  -1  13   1  219.78   10.70 
  -1  13   1  213.38   13.20 
  -1  13   1  218.78   13.00 
  -1 -13   1  233.38   12.80 
   1 -13  -1  196.98   11.70 
  -1 -13   1  216.58   12.50 
  -1 -13   1  227.98   12.90 
   1 -13  -1  218.88   14.60 
   1 -13  -1  223.88   14.70 
  -1 -13   1  211.68   12.60 
  -1 -13   1  212.68   17.90 
  -1 -13   1  210.48   12.20 
   1 -13  -1  232.98   18.00 
   1 -13  -1  201.28   14.10 
   1  13   0  326.77   12.40 
  -1  13   0  320.37   15.10 
  -1  13   0  319.97   22.50 
  -1  13   0  305.17   15.10 
  -1  13   0  334.97   15.00 
   1  13   0  306.17   21.00 
   1  13   0  319.87   15.00 
   1  13   0  325.17   12.30 
  -1  13   0  298.97   17.90 
  -1 -13   0  309.47   14.90 
  -1 -13   0  302.07   21.60 
  -1 -13   0  346.47   21.60 
  -1 -13   0  340.87   16.40 
   1 -13   0  339.77   17.90 
  -1 -13   0  314.47   16.80 
   1 -13   0  302.47   17.00 
  -1 -13   0  331.17   16.40 
  -1 -13   0  307.37   16.30 
  -1 -13   0  328.27   16.50 
   1 -13   0  309.27   19.90 
   1 -13   0  354.26   17.50 
   1 -13   0  309.97   17.80 
   1  13   1  319.77   14.70 
  -1  13  -1  309.27   15.80 
   1  13   1  326.27   21.20 
  -1  13  -1  322.37   22.50 
   1  13   1  319.47   14.70 
   1  13   1  320.07   23.00 
  -1  13  -1  316.17   13.90 
  -1  13  -1  298.77   13.70 
   1 -13   1  349.57   20.30 
  -1 -13  -1  313.17   17.50 
  -1 -13  -1  339.17   17.40 
   1 -13   1  312.97   16.60 
   1 -13   1  323.77   17.30 
  -1 -13  -1  331.27   13.80 
  -1 -13  -1  347.37   22.70 
  -1 -13  -1  327.27   21.20 
  -1 -13  -1  339.47   14.20 
  -1 -13  -1  326.47   17.30 
   1 -13   1  308.67   18.50 
  -1 -13  -1  315.37   14.00 
  -1  13  -2  442.76   27.10 
  -1  13  -2  434.06   15.30 
   1  13   2  446.86   26.00 
   1  13   2  427.46   19.70 
  -1  13  -2  445.86   15.40 
  -1  13  -2  462.95   21.00 
   1  13   2  453.25   27.20 
   1  13   2  442.46   19.80 
   1 -13   2  472.45   25.80 
  -1 -13  -2  460.55   28.20 
   1 -13   2  436.06   20.80 
  -1 -13  -2  447.46   16.90 
  -1 -13  -2  438.06   21.70 
   1 -13   2  461.55   22.30 
   1 -13   2  463.05   20.30 
  -1 -13  -2  464.65   25.80 
  -1 -13  -2  454.55   22.20 
  -1 -13  -2  437.86   22.60 
   1  13   3  412.86   27.50 
   1  13   3  416.26   20.30 
  -1  13  -3  402.46   20.80 
   1  13   3  400.56   26.30 
   1  13   3  418.06   21.00 
  -1  13  -3  416.96   26.60 
  -1 -13  -3  414.86   25.70 
   1 -13   3  430.86   19.10 
  -1 -13  -3  451.05   28.80 
  -1 -13  -3  416.76   22.30 
  -1 -13  -3  464.15   23.30 
   1 -13   3  419.76   19.40 
  -1 -13  -3  401.06   21.20 
   1 -13   3  430.36   21.00 
   1 -13   3  388.06   25.60 
   1  13   4  255.07   15.60 
   1  13   4  248.78   16.30 
   1  13   4  272.37   17.00 
   1  13   4  261.47   22.20 
  -1  13  -4  265.37   17.10 
  -1  13  -4  216.88   20.60 
  -1 -13  -4  261.37   17.10 
  -1 -13  -4  251.07   18.20 
   1 -13   4  243.28   13.60 
   1 -13   4  274.77   16.40 
  -1 -13  -4  249.68   20.80 
  -1 -13  -4  266.27   18.00 
   1 -13   4  279.77   14.90 
  -1 -13  -4  272.77   24.50 
  -1  13  -5  225.58   19.10 
   1  13   5  237.18   16.50 
   1  13   5  230.88   17.10 
   1  13   5  224.18   15.70 
   1  13   5  243.58   22.10 
  -1  13  -5  212.58   16.00 
   1  13   5  278.87   21.20 
   1 -13   5  209.78   15.70 
  -1 -13  -5  226.48   20.40 
   1 -13   5  230.78   13.80 
  -1 -13  -5  243.58   25.00 
  -1 -13  -5  247.38   17.80 
   1 -13   5  212.28   13.00 
  -1 -13  -5  222.68   17.50 
   1  13   6   93.39   12.70 
   1  13   6   94.59   12.90 
   1  13   6  127.59   19.20 
  -1  13  -6  121.29   14.00 
   1  13   6   91.89   13.10 
  -1 -13  -6  110.29   13.60 
  -1 -13  -6   72.19   13.70 
   1 -13   6  118.29   10.00 
   1 -13   6  127.79   10.90 
  -1 -13  -6  124.89   14.80 
  -1 -13  -6   87.49   11.80 
   1  13   7   85.79    7.40 
   1  13   7   57.89   11.50 
  -1  13  -7   93.79   13.90 
   1  13   7   94.59   13.60 
   1  13   7   82.79   17.90 
   1  13   7   72.49    9.00 
  -1 -13  -7   85.29   13.20 
   1 -13   7   87.79    9.50 
  -1 -13  -7   60.69   13.70 
   1 -13   7   81.29    9.50 
  -1 -13  -7   94.99   14.20 
  -1  13  -8  188.98   18.50 
   1  13   8  134.79   17.20 
   1  13   8  159.48   17.30 
   1  13   8  169.98   15.00 
   1 -13   8  184.08   20.00 
  -1 -13  -8  108.59   17.90 
  -1 -13  -8  161.08   18.30 
   1 -13   8  180.28   17.00 
   1 -13   8  145.89   12.60 
  -1 -13  -8  182.98   17.40 
   1  13   9  212.48   24.60 
  -1  13  -9  200.18   19.20 
   1  13   9  225.48   19.90 
   1  13   9  183.68   17.80 
  -1 -13  -9  220.78   20.60 
  -1 -13  -9  234.68   20.00 
   1 -13   9  200.68   19.30 
   1 -13   9  200.58   15.10 
  -1 -13  -9  148.49   20.40 
   1  13  10   98.19   15.80 
  -1  13 -10  119.59   17.50 
   1  13  10   67.19   15.60 
  -1 -13 -10   93.99   16.00 
  -1 -13 -10   63.09   16.00 
   1 -13  10   97.19   12.20 
  -1 -13 -10  113.19   17.30 
  -1  13 -11  124.39   18.30 
   1  13  11   73.69   16.00 
   1  13  11  117.79   17.70 
  -1 -13 -11  108.19   17.90 
  -1 -13 -11  108.89   18.00 
  -1 -13 -11   95.39    7.90 
  -1 -13 -11   82.49   18.20 
   1 -13  11   86.59   12.40 
   1  13  12   20.50   15.40 
  -1  13 -12   25.20   13.90 
   1  13  12   27.60   13.80 
  -1 -13 -12   35.30   14.30 
   1 -13  12   30.50   10.30 
  -1 -13 -12   11.30   11.20 
  -1 -13 -12   13.90   13.20 
   1 -13  12   13.50   12.70 
   1  13  13   48.30   18.60 
   1  13  13   29.30   16.40 
  -1  13 -13   57.99   16.10 
   1 -13  13   50.69   11.90 
  -1 -13 -13   38.00   16.50 
  -1 -13 -13   56.19   16.00 
   1 -13  13   37.40   15.30 
  -1 -13 -13   55.89   16.50 
  -1  13 -14   50.59   16.20 
   1  13  14   12.60   16.80 
   1 -13  14   46.40   16.60 
   1 -13  14   61.39   13.30 
  -1 -13 -14   26.10   16.10 
  -1 -13 -14   38.70   16.10 
  -1 -13 -14   47.10   16.10 
  -1  13 -15   24.60   15.30 
   1  13  15  -11.40   14.50 
   1 -13  15   -1.20   10.90 
  -1 -13 -15   11.00   14.60 
   1 -13  15   21.30   16.00 
  -1 -13 -15   20.70   15.40 
  -1  13 -16   20.50   15.90 
   1  13  16  -42.80   16.40 
   1 -13  16   16.80   12.30 
  -1 -13 -16   12.50   14.60 
   1 -13  16    9.80   15.30 
  -1  13 -17    6.10   14.20 
   1 -13  17    0.90   15.40 
   1 -13  17    4.30   12.30 
  -1  13 -18   34.40   17.10 
   1 -13  18    3.90   13.90 
   1 -13  18    3.90   17.10 
  -1  15  17  -29.70   17.50 
   1  15 -17   18.50   16.60 
  -1 -15  17   26.70   17.40 
  -1 -15  17   29.70   11.90 
  -1  15  16  -28.60   17.90 
   1  15 -16   23.30   15.80 
  -1 -15  16   13.10   14.90 
  -1 -15  16   -3.40   10.00 
  -1  15  15   14.20   17.00 
   1  15 -15   86.29   18.80 
  -1 -15  15   59.39   12.60 
  -1 -15  15   61.19   18.30 
  -1  15  14    3.80   16.70 
   1  15 -14    4.50   13.70 
  -1 -15  14   12.70   14.20 
  -1 -15  14   19.40    9.60 
   1 -15 -14   20.60   14.70 
   1  15 -13  144.09   20.90 
  -1  15  13   99.49   21.50 
  -1 -15  13   79.79   18.80 
   1 -15 -13   95.49   20.70 
  -1 -15  13  135.19   14.20 
   1 -15 -13  120.89   19.80 
   1  15 -12   20.30   13.40 
  -1  15  12   16.90   14.10 
  -1  15  12    5.50   13.70 
   1 -15 -12   12.60   12.90 
   1 -15 -12   18.00   13.60 
  -1 -15  12   16.00    8.10 
  -1 -15  12   18.90   13.00 
  -1  15  11  113.39   19.60 
   1  15 -11  175.58   21.00 
  -1  15  11  127.09   19.40 
  -1  15  11  129.39   22.10 
   1 -15 -11  149.79   20.60 
  -1 -15  11  109.09   19.20 
   1 -15 -11  117.69   20.70 
  -1 -15  11  132.19   13.30 
  -1  15  10   10.70   13.20 
  -1  15  10   19.30   16.70 
   1  15 -10   18.40   12.60 
  -1  15  10   21.90    5.40 
  -1  15  10   37.70   13.60 
  -1  15  10   34.10   12.50 
   1 -15 -10   31.90   13.40 
   1 -15 -10   30.80   13.70 
  -1 -15  10   23.30    7.70 
  -1  15   9  151.08   18.20 
  -1  15   9  180.68   25.40 
  -1  15   9  164.78   19.40 
   1  15  -9  191.48   20.40 
  -1  15   9  147.59   11.80 
  -1  15   9  118.69   18.60 
  -1 -15   9  160.48   12.40 
   1 -15  -9  161.58   20.10 
  -1 -15   9  176.68   15.60 
   1 -15  -9  219.18   28.70 
   1  15  -8   45.30   12.90 
  -1  15   8   71.99   13.60 
  -1  15   8   49.20   14.80 
  -1  15   8   61.99   18.60 
  -1  15   8   54.09   13.20 
   1 -15  -8   41.90   12.80 
  -1 -15   8   54.19    7.70 
  -1 -15   8   55.19    7.70 
   1 -15  -8   61.29   13.30 
   1 -15  -8   61.19   13.80 
  -1  15   7  142.39   16.80 
  -1  15   7  173.68   22.20 
  -1  15   7  165.68   16.50 
  -1  15   7  131.79   17.80 
   1  15  -7  166.28   17.50 
   1 -15  -7  152.98   17.90 
  -1 -15   7  175.88   10.90 
  -1 -15   7  141.09   10.50 
   1 -15  -7  173.68   18.20 
   1 -15  -7  110.79   16.30 
  -1  15   6   -2.80    8.70 
  -1  15   6    4.00   12.60 
  -1  15   6    8.00    8.30 
  -1  15   6    1.90    8.80 
   1  15  -6    3.60    9.00 
   1 -15  -6   -8.30    7.70 
  -1 -15   6    5.90    5.00 
  -1 -15   6    2.90    4.60 
   1 -15  -6    3.60    9.50 
   1 -15  -6    5.80    8.70 
  -1 -15   6    3.00    5.80 
  -1  15   5   80.69   14.40 
  -1  15   5  123.69   19.20 
   1  15  -5  134.29   14.90 
  -1  15   5  119.79   14.10 
   1  15  -5  132.59   19.40 
  -1 -15   5  122.79    8.90 
   1 -15  -5  114.99   15.10 
  -1 -15   5  112.29    9.50 
   1 -15  -5   88.39   14.10 
   1 -15  -5  122.39   14.50 
  -1 -15   5  130.89   15.20 
  -1  15   4  111.19   17.70 
  -1  15   4  114.59   11.50 
   1  15  -4  112.99   17.90 
   1  15  -4  104.89   13.20 
  -1  15   4  143.79   14.20 
  -1 -15   4   64.29    9.60 
  -1 -15   4  100.99    8.50 
  -1 -15   4   98.49    9.00 
   1 -15  -4   71.39   12.20 
   1 -15  -4  116.69   13.50 
   1 -15  -4  113.99   14.70 
  -1  15   3  515.75   30.40 
   1  15  -3  544.45   32.10 
  -1  15   3  507.55   29.80 
  -1  15   3  523.55   24.50 
  -1  15   3  528.45   25.00 
   1  15  -3  548.65   25.00 
   1 -15  -3  482.05   25.70 
   1 -15  -3  516.05   31.80 
   1 -15  -3  522.15   27.50 
  -1 -15   3  552.64   29.10 
  -1 -15   3  544.45   22.00 
  -1 -15   3  531.95   22.60 
  -1 -15   3  484.35   27.10 
  -1 -15   3  550.34   22.40 
  -1  15   2   -5.60    3.80 
   1  15  -2   11.80    6.90 
  -1  15   2    3.60   11.00 
   1  15  -2   13.80   11.80 
  -1  15   2   12.90    7.00 
  -1  15   2    8.70    5.80 
   1 -15  -2    1.80    6.80 
  -1 -15   2   11.50    5.40 
  -1 -15   2    1.50    5.10 
  -1 -15   2    4.00    5.50 
   1 -15  -2    0.70    7.20 
  -1 -15   2    3.20    6.20 
   1 -15  -2    4.40    7.20 
  -1 -15   2    0.60    5.50 
   1  15  -1  409.26   19.40 
  -1  15   1  418.96   17.10 
  -1  15   1  407.46   27.30 
  -1  15   1  409.36   18.90 
  -1  15   1  395.16   19.10 
   1  15  -1  436.26   27.90 
  -1 -15   1  409.46   19.40 
   1 -15  -1  405.26   25.00 
   1 -15  -1  410.06   21.70 
  -1 -15   1  417.36   19.40 
  -1 -15   1  411.76   25.80 
  -1 -15   1  411.56   19.30 
   1 -15  -1  426.86   17.70 
  -1 -15   1  399.86   19.70 
   1 -15  -1  367.96   21.10 
  -1  15   0   25.10   12.40 
  -1  15   0   43.00    6.70 
  -1  15   0   44.90    6.40 
  -1  15   0   19.80    5.10 
   1  15   0   45.80    6.90 
   1  15   0   20.00   12.50 
   1  15   0   26.90    6.50 
  -1  15   0   40.00    6.10 
  -1 -15   0   37.40    7.90 
  -1 -15   0   23.40    4.10 
   1 -15   0   40.80    8.10 
  -1 -15   0   47.30    8.20 
  -1 -15   0   37.40    7.30 
  -1 -15   0   16.60    7.30 
  -1 -15   0   37.10    6.30 
   1 -15   0   15.40    6.60 
  -1 -15   0   21.90    4.40 
   1 -15   0   13.80    4.50 
   1 -15   0   24.90    8.40 
  -1 -15   0   39.20    7.90 
   1  15   1  621.24   23.30 
  -1  15  -1  608.24   22.10 
   1  15   1  586.94   23.20 
  -1  15  -1  587.04   25.00 
  -1  15  -1  592.14   22.10 
   1  15   1  598.94   33.80 
   1  15   1  617.74   31.90 
  -1  15  -1  587.44   33.30 
   1 -15   1  576.14   29.10 
  -1 -15  -1  593.04   27.10 
  -1 -15  -1  609.24   27.50 
  -1 -15  -1  584.94   33.40 
   1 -15   1  615.34   29.30 
  -1 -15  -1  629.34   27.20 
  -1 -15  -1  546.35   22.20 
  -1 -15  -1  582.84   23.20 
  -1 -15  -1  603.74   22.10 
   1 -15   1  632.54   27.20 
   1 -15   1  605.84   26.50 
  -1  15  -2  101.69   17.10 
   1  15   2  103.29    9.40 
   1  15   2   95.69    9.60 
   1  15   2   56.09    9.40 
  -1  15  -2   79.29    9.70 
   1  15   2   89.69   16.30 
  -1 -15  -2   90.99   11.80 
   1 -15   2   48.90    7.90 
   1 -15   2   88.29    9.90 
   1 -15   2   57.49    7.60 
   1 -15   2   67.39    9.70 
  -1 -15  -2   68.19   10.50 
  -1 -15  -2   85.19   10.60 
  -1 -15  -2   70.09   12.10 
  -1  15  -3  394.36   27.70 
  -1  15  -3  391.56   20.30 
   1  15   3  383.96   26.00 
   1  15   3  397.46   20.10 
  -1 -15  -3  416.16   22.90 
   1 -15   3  422.46   20.00 
  -1 -15  -3  393.86   28.80 
   1 -15   3  427.26   21.80 
  -1 -15  -3  365.36   21.90 
   1 -15   3  418.16   20.10 
  -1 -15  -3  388.96   21.60 
   1 -15   3  420.26   26.30 
  -1  15  -4   88.69   17.10 
  -1  15  -4   63.09   10.50 
   1  15   4   68.69   10.10 
   1  15   4   84.09   16.50 
   1  15   4   72.49    9.90 
   1  15   4   63.49   10.40 
   1 -15   4   38.20    8.70 
   1 -15   4   64.99    8.70 
   1 -15   4   60.69    8.80 
  -1 -15  -4   57.49   10.80 
  -1 -15  -4   81.09   13.00 
   1 -15   4   45.30    6.80 
  -1 -15  -4   44.60   12.00 
  -1 -15  -4   52.79   10.70 
  -1  15  -5  223.18   23.00 
   1  15   5  263.87   24.50 
  -1  15  -5  223.38   17.20 
   1  15   5  278.57   19.10 
   1  15   5  247.48   17.90 
   1 -15   5  279.07   15.00 
  -1 -15  -5  241.48   20.40 
   1 -15   5  241.58   17.00 
  -1 -15  -5  257.07   19.00 
   1 -15   5  246.78   15.20 
  -1 -15  -5  281.67   29.30 
  -1 -15  -5  256.57   18.40 
   1  15   6   10.10    9.60 
   1  15   6   18.40   11.90 
  -1  15  -6   25.20   10.30 
   1  15   6   33.60    9.70 
   1  15   6   14.70    9.90 
  -1 -15  -6   29.60   11.50 
   1 -15   6   32.90    7.30 
  -1 -15  -6   25.80   11.00 
   1 -15   6   12.00    5.40 
  -1 -15  -6   14.30   10.80 
   1 -15   6   21.40    6.80 
  -1 -15  -6   35.90   10.10 
  -1  15  -7  198.18   17.30 
   1  15   7  168.88   18.10 
   1  15   7  154.58   17.10 
   1  15   7  116.29   15.50 
   1  15   7  166.38   24.10 
  -1 -15  -7  141.39   17.20 
   1 -15   7  147.19   12.50 
  -1 -15  -7  110.19   17.80 
  -1 -15  -7  184.98   20.20 
  -1 -15  -7  174.78   18.50 
   1  15   8    4.70   10.60 
   1  15   8   29.80   11.00 
   1  15   8   20.40   11.80 
  -1  15  -8   35.60   12.20 
   1  15   8    0.70   15.40 
   1 -15   8   25.50    6.60 
  -1 -15  -8   10.30   12.10 
  -1 -15  -8   14.70   11.20 
  -1 -15  -8   18.10   11.40 
  -1 -15  -8   25.30   11.70 
   1 -15   8   12.30    7.10 
   1  15   9  228.68   26.10 
   1  15   9  206.88   20.20 
   1  15   9  222.78   20.60 
  -1  15  -9  240.58   20.90 
   1  15   9  211.68   12.60 
   1  15   9  211.88   27.80 
  -1 -15  -9  264.17   22.80 
  -1 -15  -9  172.78   22.70 
  -1 -15  -9  193.68   21.40 
   1 -15   9  220.38   15.70 
   1  15  10   12.40   11.50 
   1  15  10   10.90   16.40 
   1  15  10    6.70    5.00 
  -1  15 -10    8.30   11.60 
   1  15  10   -2.70   11.90 
   1 -15  10    8.60    7.90 
  -1 -15 -10    4.10   10.90 
  -1 -15 -10    1.30   11.60 
  -1 -15 -10    0.90   12.20 
   1  15  11   90.69   17.80 
  -1  15 -11  146.19   19.60 
  -1 -15 -11   66.99   17.60 
  -1 -15 -11   95.79   18.30 
  -1 -15 -11   78.79   17.00 
   1 -15  11   97.59   12.80 
  -1  15 -12   51.99   15.10 
   1  15  12   29.50   14.90 
  -1 -15 -12   49.10   16.20 
  -1 -15 -12   23.40   14.80 
   1 -15  12   32.50   10.30 
  -1 -15 -12   64.79   16.70 
   1  15  13   42.50   17.00 
  -1  15 -13   81.29   17.40 
  -1 -15 -13   52.39   16.90 
   1 -15  13   63.39   12.50 
   1 -15  13   52.39   16.90 
  -1 -15 -13   70.69   17.70 
  -1 -15 -13   17.90   15.70 
   1  15  14  -26.00   13.90 
  -1  15 -14   -1.60   13.40 
  -1 -15 -14    1.80   14.10 
  -1 -15 -14    8.20   14.40 
  -1 -15 -14   14.30   14.60 
   1 -15  14    8.60   13.90 
   1 -15  14   15.60   10.10 
   1  15  15    3.00   15.60 
  -1  15 -15   43.70   16.50 
  -1 -15 -15   44.00   17.70 
   1 -15  15   26.10   12.00 
   1 -15  15   47.30   17.60 
   1  15  16  -31.90   16.50 
  -1  15 -16    2.60   14.30 
   1 -15  16    1.80   11.30 
  -1 -15 -16   24.70   16.20 
   1 -15  16    2.10   15.40 
   1  15  17  -25.10   16.90 
  -1  15 -17   29.10   17.30 
   1 -15  17   16.60   17.40 
  -1 -15 -17   22.30   16.60 
   1 -15  17   37.40   13.90 
  -1  17  16   52.19   18.90 
   1  17 -16   54.59   18.20 
  -1  17  16    2.70   17.40 
  -1 -17  16   23.40   11.20 
  -1 -17  16   15.30   15.50 
  -1  17  15  -20.50   17.20 
   1  17 -15   58.59   17.70 
  -1  17  15   17.10   16.30 
  -1 -17  15   16.00   15.80 
  -1 -17  15   16.80    9.80 
  -1  17  14   67.19   25.20 
  -1  17  14   38.30   19.10 
   1  17 -14   52.79   17.60 
  -1  17  14  113.79   22.30 
  -1 -17  14   54.69   11.50 
   1 -17 -14   57.89   17.30 
  -1 -17  14   45.70   17.40 
  -1  17  13    9.20   19.20 
  -1  17  13   18.50   15.70 
  -1  17  13    3.70   16.50 
   1  17 -13   26.10   15.30 
   1 -17 -13   19.20   14.00 
   1 -17 -13   23.90   15.80 
  -1 -17  13   24.20    9.20 
  -1 -17  13    2.40   13.60 
  -1  17  12   73.19   23.80 
  -1  17  12   35.40   17.20 
  -1  17  12   98.49   18.90 
   1  17 -12   84.99   17.80 
   1 -17 -12   49.10   16.70 
  -1 -17  12   57.49   10.40 
   1 -17 -12   67.59   17.50 
  -1 -17  12   37.40   15.10 
  -1  17  11   26.10   19.40 
   1  17 -11   52.89   15.40 
  -1  17  11   20.20   14.40 
  -1  17  11   36.20   14.70 
   1 -17 -11    3.00   13.30 
  -1 -17  11   18.50    7.90 
   1 -17 -11   14.00   13.80 
   1  17 -10  106.19   17.40 
  -1  17  10  122.99   24.30 
  -1  17  10  104.99   18.20 
  -1  17  10   94.69   18.30 
   1 -17 -10   78.69   17.60 
  -1 -17  10  101.19   11.20 
   1 -17 -10  102.59   18.70 
   1  17  -9   41.40   13.30 
  -1  17   9   23.80   13.30 
  -1  17   9   38.80   14.00 
  -1  17   9   26.70   17.70 
   1 -17  -9   29.00   12.90 
   1 -17  -9   26.30   13.30 
  -1 -17   9   35.90    7.80 
  -1  17   8  164.58   19.10 
  -1  17   8  113.19   18.60 
  -1  17   8  134.29   23.90 
   1  17  -8  167.88   19.30 
  -1 -17   8  156.78   11.70 
  -1 -17   8  157.48   20.10 
   1 -17  -8  178.88   21.00 
   1 -17  -8  121.29   18.40 
  -1  17   7   42.60   13.50 
  -1  17   7   81.29   19.80 
   1  17  -7   81.19   14.80 
  -1  17   7   73.19   13.80 
  -1 -17   7   53.89    9.80 
   1 -17  -7   62.89   14.00 
  -1 -17   7   91.59    9.00 
   1 -17  -7   60.59   14.70 
  -1  17   6  245.78   28.60 
   1  17  -6  251.97   19.40 
  -1  17   6  272.57   19.80 
  -1  17   6  272.47   26.30 
   1  17  -6  264.07   26.80 
   1 -17  -6  273.87   20.80 
  -1 -17   6  270.97   22.10 
   1 -17  -6  271.17   27.60 
   1 -17  -6  223.28   21.30 
  -1 -17   6  258.67   14.60 
  -1 -17   6  267.97   14.40 
  -1  17   5   41.90   10.70 
   1  17  -5   27.20   10.90 
  -1  17   5   47.10   16.30 
   1  17  -5   39.60   15.60 
  -1 -17   5   25.90    8.00 
  -1 -17   5   32.00    6.90 
   1 -17  -5   25.80   10.00 
  -1 -17   5   39.30    7.00 
   1 -17  -5   25.80   10.20 
   1 -17  -5   31.60   11.60 
   1  17  -4  450.95   31.20 
   1  17  -4  393.76   22.20 
  -1  17   4  409.26   22.60 
  -1  17   4  398.66   29.80 
   1 -17  -4  433.66   31.60 
   1 -17  -4  407.26   26.00 
  -1 -17   4  414.26   19.60 
   1 -17  -4  387.36   23.90 
  -1 -17   4  399.66   18.90 
  -1 -17   4  414.06   26.20 
  -1  17   3   94.29   11.50 
  -1  17   3  113.09   19.40 
  -1  17   3   84.39   10.70 
   1  17  -3  101.19   12.20 
   1  17  -3   84.49   17.10 
  -1 -17   3   54.89    9.60 
  -1 -17   3   98.29    9.80 
  -1 -17   3   73.09    8.90 
   1 -17  -3  122.09   15.40 
   1 -17  -3   56.79   11.60 
   1 -17  -3   63.09   11.40 
  -1 -17   3   91.99    9.90 
  -1  17   2  303.17   17.50 
   1  17  -2  323.07   26.80 
  -1  17   2  309.77   22.70 
  -1  17   2  301.47   25.50 
   1  17  -2  315.87   17.70 
   1 -17  -2  274.57   18.90 
  -1 -17   2  281.17   17.40 
  -1 -17   2  308.87   16.70 
  -1 -17   2  333.57   23.30 
  -1 -17   2  307.27   17.30 
  -1 -17   2  313.47   17.10 
   1 -17  -2  325.07   20.50 
   1 -17  -2  332.57   25.40 
   1  17  -1   25.50   13.60 
  -1  17   1   20.30   13.30 
  -1  17   1   28.30    5.70 
  -1  17   1   20.50    6.60 
   1  17  -1   25.90    7.20 
  -1  17   1   12.80    5.80 
  -1  17   1   20.70    6.20 
  -1 -17   1   19.50    7.40 
  -1 -17   1   19.90    6.80 
   1 -17  -1   16.80    9.00 
   1 -17  -1   13.40    2.80 
  -1 -17   1   14.90    4.90 
  -1 -17   1   18.00    7.60 
   1 -17  -1    8.90    7.90 
   1 -17  -1   21.50    8.30 
  -1 -17   1   17.70    7.10 
  -1  17   0  473.65   20.00 
  -1  17   0  479.85   20.00 
  -1  17   0  492.05   21.10 
   1  17   0  463.95   31.20 
   1  17   0  499.65   28.10 
  -1  17   0  464.35   29.60 
  -1 -17   0  471.65   22.00 
  -1 -17   0  510.15   24.00 
  -1 -17   0  478.85   24.00 
   1 -17   0  483.95   23.90 
   1 -17   0  518.55   23.90 
   1 -17   0  495.85   28.60 
  -1 -17   0  449.56   22.40 
  -1 -17   0  517.95   30.90 
  -1 -17   0  474.55   21.30 
   1 -17   0  501.85   25.20 
  -1  17  -1    0.90    2.60 
   1  17   1    3.30    4.20 
  -1  17  -1    3.40    2.20 
   1  17   1    1.70   12.70 
  -1  17  -1   -2.70   12.80 
   1  17   1   -2.10    3.80 
  -1  17  -1   15.80    6.90 
  -1 -17  -1    5.50    7.30 
   1 -17   1   -0.10    4.80 
   1 -17   1    8.80    7.10 
  -1 -17  -1    4.50    8.30 
  -1 -17  -1    5.00    7.30 
   1 -17   1    0.90    7.50 
   1 -17   1   -2.10    6.00 
  -1 -17  -1    4.90    8.10 
  -1  17  -2  533.85   34.20 
   1  17   2  529.35   23.40 
   1  17   2  586.54   23.90 
   1  17   2  562.54   34.60 
  -1  17  -2  565.74   25.50 
   1 -17   2  562.94   28.40 
  -1 -17  -2  542.95   35.20 
  -1 -17  -2  546.15   27.50 
   1 -17   2  565.34   26.20 
  -1 -17  -2  543.55   27.80 
   1 -17   2  521.45   30.20 
   1 -17   2  588.54   26.10 
  -1 -17  -2  579.74   27.70 
   1  17   3   68.99   15.10 
   1  17   3   77.79    9.90 
  -1  17  -3   90.79   18.90 
  -1  17  -3   94.79   11.60 
   1 -17   3   38.70    8.40 
  -1 -17  -3   74.59   12.20 
   1 -17   3   48.40    7.80 
  -1 -17  -3   69.19   12.40 
   1 -17   3   90.69   10.70 
  -1 -17  -3   40.80   11.90 
  -1 -17  -3   64.09   11.50 
  -1  17  -4  559.74   35.20 
   1  17   4  549.05   26.20 
   1  17   4  565.84   35.60 
  -1  17  -4  570.34   27.50 
   1  17   4  519.95   25.90 
   1 -17   4  555.64   25.70 
   1 -17   4  533.85   27.20 
  -1 -17  -4  575.24   39.10 
  -1 -17  -4  533.45   28.80 
  -1 -17  -4  539.35   28.20 
  -1 -17  -4  561.14   29.90 
  -1  17  -5   49.99   16.70 
   1  17   5   56.39   16.80 
   1  17   5   19.80    9.70 
  -1  17  -5   44.00   11.80 
   1 -17   5   60.39    9.30 
  -1 -17  -5   27.70   12.50 
  -1 -17  -5   43.20   11.60 
   1 -17   5   40.30    7.00 
  -1 -17  -5   46.40   11.00 
  -1 -17  -5   49.30   13.00 
  -1  17  -6   86.69   15.00 
   1  17   6  136.19   15.80 
   1  17   6  103.69   14.10 
   1  17   6   90.39   20.40 
  -1 -17  -6  101.29   16.80 
  -1 -17  -6  126.89   15.70 
  -1 -17  -6   95.39   15.10 
   1 -17   6  115.49   12.00 
  -1 -17  -6   90.19   17.00 
   1 -17   6  126.99   14.50 
  -1  17  -7   44.00   13.80 
   1  17   7   26.70   17.50 
   1  17   7   63.99   13.80 
   1  17   7   40.20   12.20 
   1  17   7   36.40   15.40 
   1 -17   7   43.20    7.70 
   1 -17   7   53.49    9.40 
  -1 -17  -7   50.69   13.50 
  -1 -17  -7   26.40   13.30 
  -1 -17  -7   51.39   13.90 
   1  17   8  285.67   28.50 
   1  17   8  214.58   20.00 
  -1  17  -8  239.98   21.80 
   1  17   8  224.48   28.80 
  -1 -17  -8  249.28   23.00 
  -1 -17  -8  156.38   23.00 
  -1 -17  -8  222.38   22.00 
   1 -17   8  229.58   19.80 
   1 -17   8  221.48   15.80 
   1  17   9   26.50   12.80 
  -1  17  -9   48.80   13.90 
   1  17   9   15.10   17.80 
   1  17   9   11.60   12.00 
   1 -17   9   34.10    8.80 
  -1 -17  -9   22.80   13.00 
  -1 -17  -9   31.80   13.70 
  -1 -17  -9   27.40   13.50 
   1  17  10   61.79   16.50 
  -1  17 -10   61.69   15.30 
   1  17  10   46.30   14.30 
   1  17  10   80.29   22.70 
  -1 -17 -10   43.20   16.70 
  -1 -17 -10   70.89   17.10 
   1 -17  10   58.99   10.60 
  -1 -17 -10   81.29   17.40 
   1  17  11    6.80   19.20 
   1  17  11    0.80   14.30 
   1  17  11   22.60   14.00 
  -1  17 -11   21.10   13.00 
  -1 -17 -11   27.40   14.70 
  -1 -17 -11    9.20   13.30 
   1 -17  11   16.80    9.10 
  -1 -17 -11   17.00   13.80 
   1  17  12   30.30   15.20 
   1  17  12   53.99   23.10 
  -1  17 -12   39.80   14.80 
   1  17  12   54.59   17.70 
  -1 -17 -12   33.90   16.00 
  -1 -17 -12   47.70   16.40 
  -1 -17 -12   24.60   14.60 
   1 -17  12   33.40   10.50 
   1  17  13   26.40   15.60 
   1  17  13   20.90   21.80 
   1  17  13    8.90   14.10 
  -1  17 -13   67.99   17.60 
   1 -17  13   47.80   11.50 
   1 -17  13   30.70   15.70 
  -1 -17 -13   47.60   17.60 
  -1 -17 -13   28.30   16.80 
  -1 -17 -13   44.20   17.20 
   1  17  14   40.00   16.40 
  -1  17 -14   47.20   17.00 
  -1 -17 -14   40.20   17.20 
   1 -17  14   44.10   12.00 
   1 -17  14   27.70   16.00 
   1  17  15   -3.30   15.70 
  -1  17 -15   49.20   16.80 
  -1 -17 -15   24.60   16.90 
   1 -17  15   19.50   11.60 
   1 -17  15   40.20   17.30 
  -1  17 -16   45.80   17.90 
   1 -17  16   33.70   18.10 
  -1 -17 -16   38.40   18.20 
   1 -17  16   36.60   12.80 
  -1  19  15   -6.70   21.80 
   1  19 -15   13.10   15.50 
  -1  19  15   36.00   18.10 
  -1  19  15   11.00   16.10 
  -1 -19  15   12.60    9.30 
  -1 -19  15    8.50   15.60 
   1  19 -14   61.39   18.30 
  -1  19  14   37.50   17.60 
  -1  19  14   30.20   22.90 
  -1  19  14   48.00   18.20 
  -1 -19  14   54.29   18.20 
   1 -19 -14   56.19   17.90 
  -1 -19  14   52.49   10.60 
   1  19 -13   29.20   16.00 
  -1  19  13    9.20   14.60 
  -1  19  13   21.70   21.30 
  -1  19  13    5.30   16.30 
   1 -19 -13   15.40   16.40 
  -1 -19  13   23.40    8.90 
   1 -19 -13   44.70   17.70 
  -1 -19  13    9.10   14.10 
   1  19 -12  107.79   19.50 
  -1  19  12   62.79   18.40 
  -1  19  12  124.19   26.30 
  -1  19  12  105.89   21.10 
   1 -19 -12   81.59   19.20 
  -1 -19  12  109.69   12.20 
  -1 -19  12   85.39   19.70 
   1 -19 -12   85.39   18.90 
  -1  19  11   23.00   19.90 
  -1  19  11   29.60   14.10 
  -1  19  11   14.90   15.10 
   1  19 -11   -5.70   13.80 
   1 -19 -11   10.30   12.50 
   1 -19 -11    4.80   13.70 
  -1 -19  11   31.10    8.40 
  -1  19  10  140.29   22.20 
  -1  19  10  159.58   20.80 
  -1  19  10  145.99   26.70 
   1  19 -10  207.18   23.50 
  -1 -19  10  152.78   13.20 
   1 -19 -10  155.38   22.40 
   1 -19 -10  103.59   19.40 
  -1 -19  10  205.48   23.80 
  -1  19   9   15.80   12.30 
   1  19  -9   26.90   13.70 
  -1  19   9   23.10   13.80 
  -1  19   9   12.50   17.70 
  -1 -19   9    5.40    6.40 
   1 -19  -9   15.80   13.40 
  -1 -19   9   -0.70    7.60 
   1 -19  -9    9.40   13.00 
  -1  19   8  309.37   29.20 
  -1  19   8  406.96   34.70 
   1  19  -8  394.36   25.70 
  -1  19   8  369.16   25.70 
  -1 -19   8  356.36   18.50 
   1 -19  -8  344.37   34.10 
  -1 -19   8  407.26   28.30 
   1 -19  -8  364.86   27.90 
  -1  19   7   57.69   16.20 
  -1  19   7   57.99   14.00 
   1  19  -7   54.49   13.40 
   1 -19  -7   38.60   13.40 
   1 -19  -7   36.40   13.80 
  -1 -19   7   34.80    9.00 
  -1 -19   7   38.40    7.70 
   1  19  -6  359.46   31.50 
  -1  19   6  343.27   30.80 
   1  19  -6  352.36   22.90 
  -1  19   6  340.47   23.60 
   1 -19  -6  334.97   25.60 
   1 -19  -6  362.56   33.60 
  -1 -19   6  345.57   25.70 
  -1 -19   6  336.37   17.70 
  -1  19   5   33.20   10.90 
   1  19  -5    9.70    9.90 
   1  19  -5   48.00   15.30 
  -1  19   5   24.90   15.90 
   1 -19  -5   32.50   13.70 
  -1 -19   5   28.90    7.10 
  -1 -19   5   34.50    7.60 
  -1 -19   5   17.40    8.00 
   1 -19  -5   17.40   11.30 
  -1  19   4  340.17   29.30 
   1  19  -4  347.27   30.10 
   1  19  -4  368.46   21.70 
  -1  19   4  298.57   20.20 
  -1 -19   4  351.26   18.10 
   1 -19  -4  288.97   29.10 
   1 -19  -4  321.27   23.40 
  -1 -19   4  324.47   17.80 
  -1 -19   4  325.07   24.80 
   1  19  -3   83.79   19.90 
   1  19  -3   83.19   12.50 
  -1  19   3   75.29   10.60 
  -1  19   3   73.29   11.00 
  -1  19   3   71.49   18.10 
   1 -19  -3   73.39   14.40 
   1 -19  -3   51.99   12.10 
   1 -19  -3   89.39   14.20 
  -1 -19   3   64.29    9.80 
  -1 -19   3   88.79   10.40 
  -1 -19   3   53.09   10.10 
  -1  19   2  200.68   24.00 
   1  19  -2  169.68   14.80 
   1  19  -2  202.58   26.20 
  -1  19   2  173.48   14.10 
   1 -19  -2  181.78   17.50 
  -1 -19   2  158.28   18.10 
   1 -19  -2  167.98   17.50 
  -1 -19   2  183.88   20.60 
  -1 -19   2  183.58   14.80 
  -1 -19   2  165.58   14.00 
  -1  19   1  125.89   10.80 
  -1  19   1  120.19   10.50 
   1  19  -1  128.69   12.40 
  -1  19   1  133.59   15.70 
   1  19  -1  138.29   22.50 
  -1  19   1  150.78   22.50 
   1 -19  -1   78.19   12.50 
   1 -19  -1  138.59   15.30 
  -1 -19   1  122.89   13.30 
  -1 -19   1  134.89   13.30 
  -1 -19   1   82.29   12.40 
   1 -19  -1  151.48   16.00 
  -1 -19   1  108.19   14.40 
  -1 -19   1  124.89   13.30 
  -1  19   0   53.79   17.20 
   1  19   0   52.09   17.60 
  -1  19   0   60.69    8.40 
  -1  19   0   45.40    5.60 
  -1  19   0   47.40    5.70 
  -1 -19   0   34.20    4.70 
  -1 -19   0   25.80    5.20 
   1 -19   0   56.89   11.00 
  -1 -19   0   57.69   10.70 
  -1 -19   0   50.49   10.40 
   1 -19   0   29.10    5.40 
   1 -19   0   45.40   11.10 
  -1 -19   0   19.30    9.50 
   1 -19   0   37.20    9.50 
   1  19   1  272.97   26.90 
  -1  19  -1  276.87   16.00 
  -1  19  -1  238.58   26.40 
   1  19   1  231.08    9.10 
   1  19   1  225.58    9.10 
   1 -19   1  242.88   20.10 
   1 -19   1  265.87   18.40 
   1 -19   1  269.37   18.00 
  -1 -19  -1  294.17   19.50 
   1 -19   1  245.38   21.80 
  -1 -19  -1  289.57   19.00 
  -1 -19  -1  312.97   27.40 
  -1  19  -2  365.06   20.70 
   1  19   2  391.56   17.60 
  -1  19  -2  441.16   32.00 
   1  19   2  381.36   18.50 
   1  19   2  390.46   30.80 
   1 -19   2  365.26   21.10 
   1 -19   2  354.46   21.30 
   1 -19   2  331.37   25.80 
  -1 -19  -2  336.97   30.90 
   1 -19   2  374.16   24.30 
  -1 -19  -2  384.16   22.90 
  -1 -19  -2  351.36   21.80 
  -1  19  -3   23.70    9.90 
   1  19   3   25.10    8.00 
   1  19   3   19.20   15.80 
  -1  19  -3   22.70   15.50 
   1 -19   3   15.60    6.60 
   1 -19   3   13.40    7.40 
   1 -19   3    4.90    6.90 
  -1 -19  -3   28.70   10.70 
  -1 -19  -3   18.80   11.40 
  -1 -19  -3   23.00   10.00 
   1 -19   3   17.60    8.90 
  -1  19  -4  290.87   20.00 
  -1  19  -4  281.07   27.90 
   1  19   4  295.27   18.60 
   1  19   4  234.48   27.10 
  -1 -19  -4  270.47   22.10 
   1 -19   4  292.37   20.30 
  -1 -19  -4  294.57   23.00 
   1 -19   4  297.07   18.80 
  -1 -19  -4  320.27   28.00 
  -1 -19  -4  306.17   30.30 
   1  19   5   30.60    9.80 
  -1  19  -5   18.70   11.50 
   1  19   5   37.40   17.40 
  -1  19  -5   20.40   16.10 
  -1 -19  -5   25.60   13.90 
  -1 -19  -5   32.20   11.80 
   1 -19   5   19.70    6.40 
   1 -19   5   33.40    9.00 
  -1 -19  -5   15.40   10.40 
   1  19   6  156.18   24.70 
  -1  19  -6  126.39   16.20 
   1  19   6  165.58   17.30 
  -1 -19  -6  111.89   18.90 
  -1 -19  -6  134.49   18.00 
   1 -19   6  165.58   14.10 
  -1 -19  -6  138.19   19.00 
   1 -19   6  157.38   16.10 
   1  19   7   13.80   16.80 
   1  19   7    8.00   10.90 
  -1  19  -7   13.80   11.40 
   1 -19   7   11.30    7.70 
   1 -19   7    6.70    6.40 
  -1 -19  -7   15.60   11.80 
  -1 -19  -7   15.90   11.80 
  -1 -19  -7    0.90   11.80 
  -1  19  -8  200.78   21.10 
   1  19   8  198.08   20.80 
   1  19   8  179.68   27.90 
  -1 -19  -8  136.79   21.40 
  -1 -19  -8  188.28   21.70 
   1 -19   8  166.48   14.30 
  -1 -19  -8  180.08   21.30 
   1  19   9   71.79   16.30 
   1  19   9   36.80   19.30 
   1  19   9   33.30   13.40 
  -1  19  -9   59.69   15.10 
  -1 -19  -9   40.70   14.10 
   1 -19   9   48.40    9.90 
  -1 -19  -9   41.50   15.10 
  -1 -19  -9   46.30   15.80 
  -1  19 -10  111.99   18.10 
   1  19  10   90.69   24.70 
   1  19  10   89.39   17.10 
   1  19  10   61.59   15.40 
   1 -19  10   81.69   11.90 
  -1 -19 -10   86.49   18.10 
  -1 -19 -10   77.29   17.80 
  -1 -19 -10   41.40   16.10 
   1  19  11   38.70   14.50 
   1  19  11    2.70   14.50 
   1  19  11  -19.30   17.40 
  -1  19 -11  -15.70   11.50 
  -1 -19 -11    8.20   13.40 
  -1 -19 -11   24.80   15.10 
   1 -19  11   14.10    9.00 
   1  19  12   13.40   20.20 
   1  19  12   22.00   13.90 
  -1  19 -12   33.10   15.70 
   1  19  12   46.70   17.70 
  -1 -19 -12   36.20   16.00 
  -1 -19 -12   32.90   17.70 
   1 -19  12   47.70   11.20 
   1  19  13    9.40   15.50 
   1  19  13   15.40   14.20 
  -1  19 -13   18.20   14.60 
   1  19  13  -15.40   18.00 
   1 -19  13   14.50    9.90 
  -1 -19 -13   12.20   15.30 
  -1 -19 -13   19.60   15.00 
   1  19  14   21.40   23.30 
  -1  19 -14   59.29   18.40 
   1  19  14   44.30   18.00 
   1 -19  14   14.40   10.50 
  -1 -19 -14    5.90   14.90 
   1 -19  14   44.20   17.50 
  -1  19 -15   38.00   17.30 
   1  19  15   29.80   19.50 
   1  19  15  -12.30   23.00 
   1 -19  15   18.50   16.00 
   1 -19  15   15.60   10.90 
  -1 -19 -15    1.60   14.10 
  -1  21  14   -9.40   19.70 
  -1  21  14    7.70   19.30 
  -1  21  14   14.20   17.40 
   1  21 -14   13.00   15.90 
   1 -21 -14   33.40   15.30 
  -1 -21  14   -3.00    8.00 
  -1 -21  14   20.50   17.00 
  -1  21  13   88.59   19.50 
  -1  21  13   95.49   27.00 
  -1  21  13   80.19   19.60 
   1  21 -13   75.59   19.00 
   1 -21 -13   75.29   18.70 
  -1 -21  13   70.19   11.10 
  -1 -21  13   67.79   18.90 
   1 -21 -13   68.79   22.30 
  -1  21  12   35.90   15.40 
  -1  21  12    6.20   19.00 
  -1  21  12   28.90   15.60 
   1  21 -12   16.20   16.40 
  -1 -21  12   11.00   14.00 
  -1 -21  12   12.20    8.20 
   1 -21 -12   -2.80   14.00 
   1 -21 -12   15.30   14.20 
  -1  21  11   80.29   19.40 
   1  21 -11   82.39   17.80 
  -1  21  11   82.19   24.90 
  -1  21  11   43.50   15.90 
   1 -21 -11  117.09   20.80 
  -1 -21  11   75.39   10.30 
   1 -21 -11   62.29   16.90 
  -1  21  10   14.90   12.90 
  -1  21  10   15.00   18.60 
  -1  21  10   38.90   14.20 
   1  21 -10   11.10   12.50 
  -1 -21  10   23.20    7.80 
   1 -21 -10   16.10   12.00 
   1 -21 -10    7.00   14.10 
   1  21  -9  143.39   21.00 
  -1  21   9  159.28   27.70 
  -1  21   9  114.89   18.00 
   1 -21  -9   99.09   18.80 
  -1 -21   9  108.39   11.10 
   1 -21  -9  147.39   21.90 
  -1  21   8    0.80   16.10 
   1  21  -8  -13.20   10.70 
  -1  21   8   15.20   12.50 
   1 -21  -8   -9.30   11.80 
   1 -21  -8    6.30   11.40 
  -1 -21   8    4.20    6.40 
  -1  21   7  202.58   28.80 
   1  21  -7  219.98   22.40 
  -1  21   7  191.78   20.10 
  -1 -21   7  172.78   13.70 
   1 -21  -7  224.98   24.80 
  -1  21   6  -14.90   14.10 
   1  21  -6   -9.30   10.40 
  -1  21   6    6.70   10.80 
   1  21  -6    1.40   12.60 
  -1 -21   6    3.40    7.80 
  -1 -21   6    2.30    6.50 
   1 -21  -6   16.80   13.80 
  -1 -21   6    2.70    6.60 
   1 -21  -6   12.50   11.20 
   1  21  -5  256.27   20.20 
  -1  21   5  221.58   29.40 
  -1  21   5  223.58   19.30 
   1  21  -5  236.38   29.60 
  -1 -21   5  222.28   22.30 
   1 -21  -5  243.68   23.70 
  -1 -21   5  220.08   15.40 
  -1 -21   5  203.38   15.00 
   1 -21  -5  271.07   29.20 
  -1  21   4    6.70   15.90 
   1  21  -4   32.10   17.60 
   1  21  -4    9.40    9.40 
  -1  21   4   19.00    9.60 
  -1 -21   4   19.90    8.00 
   1 -21  -4   16.80   11.30 
  -1 -21   4    6.60    8.00 
  -1 -21   4   10.10    7.30 
   1 -21  -4    5.20   10.60 
  -1  21   3  268.47   28.80 
   1  21  -3  297.37   19.50 
   1  21  -3  304.77   29.70 
  -1  21   3  244.58   17.30 
  -1 -21   3  242.98   17.40 
   1 -21  -3  264.57   28.10 
  -1 -21   3  282.47   17.70 
   1 -21  -3  249.88   21.20 
  -1 -21   3  242.38   23.70 
   1  21  -2  132.19   23.30 
   1  21  -2  139.89   14.00 
  -1  21   2  129.89   12.50 
  -1  21   2  138.29   21.90 
  -1 -21   2  143.19   14.50 
   1 -21  -2   93.99   14.60 
  -1 -21   2  154.38   16.70 
   1 -21  -2  151.68   18.00 
  -1 -21   2  139.39   14.30 
   1  21  -1  378.46   32.80 
  -1  21   1  396.66   32.90 
  -1  21   1  412.26   18.30 
  -1 -21   1  446.96   32.10 
  -1 -21   1  420.76   23.80 
  -1 -21   1  427.16   23.60 
   1 -21  -1  434.86   30.60 
   1 -21  -1  413.26   25.80 
  -1  21   0   78.69   20.30 
   1  21   0   82.69   20.40 
  -1  21   0   82.89    9.50 
  -1 -21   0   73.69   12.50 
  -1 -21   0   92.89   12.90 
   1 -21   0   41.80   10.70 
  -1 -21   0   40.00   11.90 
   1 -21   0   51.39   12.20 
  -1  21  -1   75.59   20.90 
  -1  21  -1   73.39   10.50 
   1  21   1   72.79   19.90 
  -1 -21  -1   58.09   12.30 
   1 -21   1   63.79   12.30 
  -1 -21  -1   60.79   13.50 
  -1 -21  -1   34.70   12.30 
   1 -21   1   80.69   12.30 
   1  21   2   16.50   16.30 
  -1  21  -2   28.50    9.20 
  -1  21  -2    5.60   16.50 
   1 -21   2   13.80    8.90 
  -1 -21  -2   -2.50   10.70 
  -1 -21  -2   15.00    9.90 
   1 -21   2    3.60    7.50 
   1 -21   2   17.30    9.80 
   1  21   3  107.29   22.20 
   1  21   3   80.49    9.70 
  -1  21  -3   83.49   12.20 
  -1  21  -3  116.89   23.30 
   1 -21   3   82.79   12.40 
  -1 -21  -3   40.10   13.00 
   1 -21   3   96.89   12.70 
  -1 -21  -3   88.29   14.70 
  -1  21  -4   20.10   10.50 
   1  21   4   27.00    8.80 
  -1  21  -4   11.70   17.40 
   1  21   4   10.90   16.40 
   1 -21   4   17.20    8.00 
  -1 -21  -4   12.80   11.70 
   1 -21   4   24.20    9.50 
  -1 -21  -4    4.90   12.50 
  -1  21  -5  155.98   17.50 
  -1  21  -5  123.49   24.40 
   1  21   5  179.38   25.50 
   1  21   5  194.18   16.40 
   1 -21   5  149.79   14.80 
  -1 -21  -5  132.49   18.40 
  -1 -21  -5  120.49   19.10 
   1  21   6   17.50   10.50 
   1  21   6   31.90   18.80 
  -1  21  -6   20.90   11.10 
  -1 -21  -6   21.40   12.60 
   1 -21   6   20.30    9.00 
  -1 -21  -6   11.40   12.50 
   1  21   7   85.79   14.50 
   1  21   7   87.09   23.30 
  -1  21  -7   78.19   15.80 
  -1 -21  -7   50.99   15.70 
  -1 -21  -7   92.19   17.30 
   1 -21   7   65.99   10.80 
  -1  21  -8   39.70   13.80 
   1  21   8   38.00   16.90 
   1  21   8   32.10   12.80 
  -1 -21  -8   31.10   14.80 
   1 -21   8   18.80    8.70 
  -1 -21  -8   31.60   14.60 
   1  21   9   88.59   16.00 
  -1  21  -9   77.09   16.70 
   1  21   9   91.19   24.70 
  -1 -21  -9   59.59   17.00 
   1 -21   9  101.19   12.40 
  -1 -21  -9  125.99   20.90 
   1  21  10   52.89   15.60 
  -1  21 -10   51.89   15.50 
   1  21  10   40.80   22.30 
  -1 -21 -10   22.30   15.90 
  -1 -21 -10   55.59   16.70 
   1 -21  10   50.59   10.50 
   1  21  11   67.99   15.60 
   1  21  11   58.59   17.80 
   1  21  11   98.59   26.70 
  -1  21 -11  102.39   19.50 
   1 -21  11   49.10   11.10 
  -1 -21 -11   43.80   16.40 
  -1 -21 -11   26.30   15.60 
   1  21  12   -0.40   15.20 
   1  21  12   23.40   21.40 
  -1  21 -12   20.50   15.20 
  -1 -21 -12   19.20   15.10 
   1 -21  12   16.40    9.50 
  -1 -21 -12   -0.70   14.00 
   1  21  13   36.00   18.30 
   1  21  13   12.20   21.40 
  -1  21 -13   24.40   15.70 
  -1 -21 -13   23.70   17.50 
   1 -21  13   24.40   10.60 
  -1 -21 -13   36.80   17.10 
  -1  21 -14   28.70   16.40 
   1  21  14   27.40   24.10 
   1  21  14   17.50   17.60 
   1 -21  14    0.90   12.60 
   1 -21  14   -3.20   16.30 
  -1 -21 -14   16.30   15.20 
  -1  23  12   -3.00   13.40 
  -1  23  12  -20.50   17.60 
   1  23 -12   17.90   15.10 
   1 -23 -12   18.70   18.50 
   1 -23 -12    8.20   11.90 
  -1 -23  12    4.60    7.50 
  -1  23  11   45.70   17.10 
   1  23 -11   58.49   17.10 
  -1  23  11   82.99   25.10 
  -1 -23  11   40.40    8.90 
   1 -23 -11   48.90   18.20 
   1 -23 -11   48.40   15.50 
  -1  23  10   29.90   20.00 
   1  23 -10   38.80   15.80 
  -1  23  10   13.80   12.70 
   1 -23 -10   18.60   16.40 
  -1 -23  10   29.40    8.30 
   1 -23 -10   35.40   15.30 
  -1  23   9   58.39   22.70 
  -1  23   9   53.79   15.20 
   1  23  -9   81.59   17.60 
   1 -23  -9   66.39   16.60 
   1 -23  -9   50.89   16.60 
  -1 -23   9   67.29    9.60 
  -1  23   8   67.39   22.70 
  -1  23   8   47.30   14.50 
   1  23  -8   64.29   15.80 
  -1 -23   8   50.89    8.80 
   1 -23  -8   36.50   16.00 
   1 -23  -8   40.00   13.80 
  -1 -23   8   47.30    8.60 
  -1  23   7   44.80   19.60 
  -1  23   7   18.10   12.10 
   1  23  -7   36.80   13.10 
   1 -23  -7   23.60   12.70 
  -1 -23   7   43.70    8.60 
   1 -23  -7   24.40   14.60 
  -1 -23   7   43.80    8.90 
   1  23  -6   44.40   21.10 
  -1  23   6   67.29   13.60 
   1  23  -6   72.59   14.80 
  -1  23   6   88.39   22.20 
   1 -23  -6   53.59   15.80 
   1 -23  -6   46.80   13.80 
  -1 -23   6   58.49    9.50 
  -1 -23   6   59.19    9.70 
   1  23  -5   79.59   13.90 
  -1  23   5   68.89   12.90 
   1  23  -5   83.09   23.00 
  -1  23   5   81.79   22.50 
  -1 -23   5   77.99   11.00 
   1 -23  -5   39.70   13.10 
   1 -23  -5   77.69   16.40 
  -1 -23   5   69.69   10.80 
   1  23  -4   57.89   21.10 
   1  23  -4   84.19   13.80 
  -1  23   4   81.09   22.00 
  -1  23   4   75.69   12.30 
  -1 -23   4   85.89   11.70 
  -1 -23   4   84.89   11.70 
   1 -23  -4   44.60   13.00 
   1 -23  -4  102.49   18.20 
   1  23  -3  121.99   14.70 
  -1  23   3  154.88   26.50 
   1  23  -3  193.78   28.30 
   1 -23  -3   96.29   15.40 
   1 -23  -3  148.19   19.60 
  -1 -23   3  147.39   14.70 
  -1  23   2   43.40   16.70 
   1  23  -2   43.20   19.20 
   1 -23  -2   59.99   14.80 
  -1 -23   2   19.90   12.60 
   1 -23  -2   19.60   10.80 
  -1 -23   2   60.19   11.40 
  -1  23   1  386.56   34.00 
   1  23  -1  377.56   33.90 
   1 -23  -1  354.46   25.20 
  -1 -23   1  372.06   23.20 
  -1 -23   1  333.37   30.10 
  -1  23   0  115.29   23.90 
   1  23   0  129.89   24.80 
  -1 -23   0  104.49   14.80 
   1 -23   0  104.69   15.50 
   1  23   1   41.10   18.80 
  -1  23  -1   42.00   19.30 
   1 -23   1   19.90   10.80 
  -1 -23  -1   29.60   11.50 
  -1 -23  -1    8.70   11.60 
  -1  23  -2   46.60   20.10 
  -1  23  -2   38.10    9.90 
   1  23   2   12.60   17.30 
  -1 -23  -2   33.50   12.10 
   1 -23   2   41.40   11.20 
  -1 -23  -2    7.00   12.10 
  -1  23  -3  150.18   15.80 
   1  23   3  158.98   27.20 
  -1  23  -3  164.88   27.10 
  -1 -23  -3  142.69   18.60 
   1 -23   3  145.69   16.10 
   1  23   4   74.49   21.80 
  -1  23  -4   76.49   19.50 
  -1  23  -4   81.79   13.80 
  -1 -23  -4   71.99   15.20 
  -1 -23  -4   38.10   15.10 
   1 -23   4   72.29   12.30 
   1  23   5   83.89   14.10 
  -1  23  -5  109.29   24.60 
   1  23   5  122.09   25.50 
  -1  23  -5  110.09   16.20 
  -1 -23  -5   84.79   16.70 
  -1 -23  -5   43.70   16.10 
   1 -23   5  107.49   13.50 
   1  23   6   46.70   11.80 
  -1  23  -6   58.89   13.90 
   1  23   6   88.29   23.10 
   1 -23   6   57.39   11.00 
  -1 -23  -6   22.40   14.70 
  -1 -23  -6   55.79   15.20 
   1  23   7   66.09   22.70 
  -1  23  -7   66.99   14.30 
   1  23   7   68.59   14.10 
  -1 -23  -7   61.99   16.50 
  -1 -23  -7   21.70   15.00 
   1 -23   7   57.89   10.90 
   1  23   8   51.69   19.20 
  -1  23  -8   40.60   14.70 
   1  23   8   50.89   13.40 
  -1 -23  -8   25.60   16.40 
   1 -23   8   35.40    9.90 
  -1 -23  -8   41.90   15.50 
   1  23   9   37.90   14.40 
   1  23   9   45.90   22.00 
  -1  23  -9   74.59   17.50 
  -1 -23  -9   30.00   15.20 
  -1 -23  -9   47.90   17.20 
   1 -23   9   73.49   11.50 
   1  23  10   38.40   15.10 
   1  23  10   37.00   18.30 
  -1  23 -10   24.00   15.10 
  -1 -23 -10   38.00   17.00 
   1 -23  10   11.10    9.00 
  -1 -23 -10   47.20   17.40 
   1  23  11   32.00   21.80 
   1  23  11   46.50   16.00 
  -1  23 -11   55.79   16.90 
  -1 -23 -11   47.70   17.50 
   1 -23  11   38.00   10.80 
  -1 -23 -11   58.59   20.20 
   1  23  12   34.90   24.00 
   1  23  12    7.90   16.00 
  -1  23 -12   16.70   15.00 
  -1 -23 -12   18.00   14.60 
   1 -23  12    7.50    9.30 
  -1 -23 -12  -10.30   17.00 
  -1  25  10   93.49   26.40 
   1  25 -10   89.99   19.00 
  -1  25  10   50.29   16.40 
   1 -25 -10   85.69   19.20 
  -1 -25  10   69.89   10.10 
   1 -25 -10   73.39   20.00 
  -1  25   9   -3.10   19.10 
  -1  25   9   -7.60   12.60 
   1  25  -9   17.80   13.60 
  -1 -25   9   -8.60    6.40 
   1 -25  -9   -9.50   15.90 
   1 -25  -9   19.80   18.80 
  -1  25   8  114.79   18.20 
  -1  25   8  164.68   29.60 
   1  25  -8  162.18   21.20 
   1 -25  -8  155.98   23.30 
  -1 -25   8  132.09   12.80 
  -1  25   7   -4.00   17.90 
   1  25  -7   -9.80   11.30 
   1 -25  -7   -5.60   12.90 
  -1 -25   7   -7.00    7.00 
  -1  25   6  121.39   26.50 
   1  25  -6  110.49   17.90 
   1  25  -6  136.39   28.10 
  -1 -25   6  130.89   13.40 
   1 -25  -6  109.09   19.60 
   1  25  -5  -12.70   16.80 
   1  25  -5  -11.50    9.70 
  -1  25   5   13.10   19.50 
   1 -25  -5    2.80   14.00 
  -1 -25   5    4.00    8.20 
  -1  25   4  177.38   29.60 
   1  25  -4  209.38   31.80 
   1 -25  -4  195.28   22.70 
  -1 -25   4  195.68   17.10 
  -1  25   3   11.30   17.70 
   1  25  -3  -10.30   17.00 
   1 -25  -3    4.70   12.60 
  -1 -25   3    2.10    8.50 
   1  25  -2  156.88   28.60 
  -1  25   2  189.68   29.60 
  -1 -25   2  134.39   16.10 
   1 -25  -2  187.18   21.40 
  -1  25   1   30.20   19.80 
   1  25  -1   38.20   20.20 
   1 -25  -1    3.90   11.90 
  -1 -25   1   27.80   11.40 
   1  25   0  262.77   33.00 
  -1  25   0  244.38   32.70 
  -1 -25   0  230.08   20.40 
   1 -25   0  210.68   21.20 
   1  25   1   17.90   18.30 
  -1  25  -1   -7.20   16.00 
  -1 -25  -1    1.80   10.80 
   1 -25   1   26.90   11.40 
   1  25   2  179.68   29.70 
  -1  25  -2  169.48   29.10 
  -1 -25  -2  149.39   19.30 
   1 -25   2  171.08   18.60 
   1  25   3   -0.40   17.60 
  -1  25  -3    0.30   17.20 
  -1 -25  -3   -9.40   11.50 
   1 -25   3   -4.30    9.40 
   1  25   4  149.69   28.00 
  -1  25  -4  119.29   26.50 
  -1 -25  -4   59.89   17.30 
  -1 -25  -4   98.29   17.50 
   1 -25   4  118.29   15.20 
  -1  25  -5  -20.80   16.00 
  -1  25  -5    5.70   10.80 
   1  25   5   -1.30   17.30 
  -1 -25  -5    0.60   12.80 
  -1 -25  -5    3.80   13.40 
   1 -25   5   -1.00    8.80 
  -1  25  -6   92.59   16.50 
   1  25   6  100.79   24.70 
   1 -25   6  104.29   13.90 
  -1 -25  -6   87.99   19.30 
  -1 -25  -6   65.69   17.50 
  -1  25  -7   21.90   12.70 
   1  25   7  -13.80   17.90 
  -1 -25  -7   -0.20   13.30 
  -1 -25  -7    9.10   15.20 
   1 -25   7    6.80    8.80 
  -1  25  -8  111.99   19.20 
   1  25   8  110.09   27.50 
  -1 -25  -8  102.09   20.50 
   1 -25   8  107.09   13.20 
  -1 -25  -8   63.79   18.60 
  -1  25  -9  -13.10   11.90 
   1  25   9   11.20   20.50 
   1 -25   9   -1.70    8.50 
  -1 -25  -9  -21.40   15.20 
  -1 -25  -9    2.30   12.50 
  -1  25 -10   65.69   17.00 
   1  25  10   75.69   26.60 
   1 -25  10   41.20   10.50 
  -1 -25 -10   36.70   18.10 
  -1 -25 -10   58.39   18.10 
  -1  27   7   60.29   24.20 
   1 -27  -7   32.00   17.50 
  -1 -27   7   32.00    9.10 
  -1  27   6   54.19   23.90 
   1  27  -6   29.50   19.10 
  -1 -27   6   32.00    9.70 
   1 -27  -6    6.40   15.50 
  -1  27   5   50.19   23.90 
   1  27  -5   87.19   25.50 
  -1 -27   5   66.99   11.80 
   1 -27  -5   62.99   18.60 
   1  27  -4   35.40   21.40 
  -1  27   4   40.10   22.10 
   1 -27  -4   48.70   16.70 
  -1 -27   4   47.10   11.50 
   1  27  -3   73.69   24.10 
  -1  27   3  104.39   25.70 
   1 -27  -3   45.90   15.20 
  -1 -27   3   44.80   11.40 
   1  27  -2   79.69   24.80 
  -1  27   2  113.49   25.90 
   1 -27  -2  105.29   18.20 
  -1 -27   2   81.39   14.10 
  -1  27   1   64.09   23.00 
   1  27  -1   80.39   24.60 
  -1 -27   1   54.09   13.00 
   1 -27  -1   72.29   16.30 
   1  27   0   90.29   25.70 
  -1  27   0   99.79   25.80 
   1 -27   0   79.29   16.00 
  -1 -27   0   58.19   14.60 
   1  27   1   14.60   19.90 
  -1  27  -1   57.69   23.60 
  -1 -27  -1   71.19   15.00 
   1 -27   1   26.40   12.10 
  -1  27  -2  140.69   29.00 
   1  27   2   69.09   24.20 
   1 -27   2   89.69   15.30 
  -1 -27  -2  108.09   17.90 
   1  27   3   52.59   23.80 
  -1  27  -3   24.20   19.70 
   1 -27   3   42.00   12.20 
  -1 -27  -3   52.59   15.80 
  -1  27  -4   72.99   24.50 
   1  27   4   76.29   25.70 
   1 -27   4   75.49   13.90 
  -1 -27  -4   46.60   16.20 
  -1  27  -5   25.40   21.40 
   1  27   5   28.60   21.40 
  -1 -27  -5   36.00   16.40 
   1 -27   5   30.10   11.20 
   1  27   6   43.40   23.10 
   1 -27   6    8.30    9.90 
  -1 -27  -6    8.00   13.20 
   1  27   7   96.39   26.90 
  -1 -27  -7   72.49   18.60 
   1 -27   7   65.29   12.60 
  -1  29   2    7.80   25.10 
  -1  29   1   60.49   25.70 
   1 -29  -1   72.59   25.50 
   1  29   0   -4.10   24.00 
  -1  29   0   11.10   21.90 
  -1  29  -1   82.39   32.00 
  -2   0  20   13.80   19.10 
   2   0 -20   83.19   19.00 
  -2   0  20   55.59   18.90 
  -2   0  19   -2.00   16.40 
   2   0 -19    3.30   13.80 
  -2   0  19   -6.60   13.80 
   2   0 -18   64.29   17.00 
  -2   0  18   41.50   18.90 
  -2   0  18   51.39   16.00 
  -2   0  17  -14.50   13.40 
  -2   0  17  -15.60   10.80 
   2   0 -17   -9.40   12.10 
   2   0 -16   20.80   14.00 
  -2   0  16   19.60   12.60 
  -2   0  16   18.40   14.20 
  -2   0  15   46.00   14.80 
   2   0 -15   47.80   12.60 
  -2   0  15   13.40   13.30 
  -2   0  14  418.26   28.10 
  -2   0  14  388.76   36.00 
   2   0 -14  420.26   25.70 
  -2   0  13    2.90    9.50 
   2   0 -13   27.70   10.10 
   2   0 -13    3.40    9.50 
  -2   0  13   17.60   12.10 
   2   0 -12  442.66   25.90 
  -2   0  12  456.15   34.10 
  -2   0  12  443.66   25.70 
   2   0 -12  458.95   25.20 
   2   0 -11  -12.00    7.60 
  -2   0  11   -3.80    8.10 
  -2   0  11    1.50    8.70 
   2   0 -11   -2.40    6.80 
   2   0 -10  487.95   25.80 
   2   0 -10  598.34   27.40 
  -2   0  10  589.84   35.10 
  -2   0  10  604.04   27.90 
   2   0  -9    0.30    7.70 
  -2   0   9   10.90    7.40 
  -2   0   9   11.00    8.30 
   2   0  -9    4.90    6.90 
   2   0  -8   22.20    7.20 
   2   0  -8   28.50    8.10 
  -2   0   8   40.10    8.20 
  -2   0   8   23.40    7.90 
  -2   0   8   34.40    8.30 
   2   0  -8   23.40    7.40 
  -2   0   8   21.00    8.60 
   2   0  -7    7.10    6.70 
   2   0  -7    1.70    5.80 
   2   0  -7    8.90    6.30 
   2   0  -7   11.00    5.60 
  -2   0   7    9.70    6.80 
  -2   0   7    4.00    6.20 
  -2   0   7    5.00    7.00 
  -2   0   7    7.80    6.60 
  -2   0   7    9.60    6.00 
   2   0  -6  476.25   21.30 
   2   0  -6  459.95   25.00 
  -2   0   6  467.05   26.50 
   2   0  -6  492.05   21.50 
   2   0  -6  505.05   21.40 
  -2   0   6  500.45   26.80 
  -2   0   6  498.25   21.30 
  -2   0   6  481.85   21.40 
   2   0  -5   -4.70    5.40 
  -2   0   5   -2.60    5.20 
   2   0  -5   -0.70    1.50 
   2   0  -5   -2.90    4.40 
  -2   0   5    0.60    6.20 
   2   0  -5    1.70    5.40 
  -2   0   5   -3.80    5.40 
  -2   0   5   -1.70    5.20 
  -2   0   4 2054.79   71.49 
   2   0  -4 1780.22   66.49 
   2   0  -4 2006.80   66.89 
  -2   0   4 1918.81   66.89 
  -2   0   4 2045.30   67.19 
   2   0  -4 2014.60   67.09 
  -2   0   3    5.50    5.30 
   2   0  -3   -2.90    4.70 
   2   0  -3    2.20    4.30 
   2   0  -3    6.50    4.10 
  -2   0   3   -2.10    4.10 
  -2   0   3    0.10    4.70 
   2   0  -3   -0.70    3.90 
  -2   0   3    3.40    4.20 
  -2   0   2 5150.28  165.88 
  -2   0   2 5057.29  168.18 
   2   0  -2 4917.51  165.68 
  -2   0   2 5094.89  165.88 
   2   0  -2 5043.50  168.18 
  -2   0   2 5144.99  166.08 
  -2   0   2 5197.18  169.38 
   2   0  -2 5207.08  165.78 
  -2   0   1   -0.20    2.70 
   2   0  -1   -0.90    2.70 
   2   0  -1   -0.90    2.50 
   2   0  -1   -3.10    2.60 
  -2   0   1   -3.10    2.80 
   2   0  -1   -1.80    0.90 
  -2   0   1   -2.30    2.60 
  -2   0   1   -2.10    2.70 
  -2   0   0 1666.93   55.09 
  -2   0   0 1400.66   53.49 
   2   0   0 1673.23   53.79 
   2   0   0 1662.33   53.69 
  -2   0   0 1681.63   54.19 
  -2   0   0 1631.54   53.69 
  -2   0   0 1664.83   56.19 
   2   0   0 1573.64   54.09 
  -2   0  -1   14.00    3.80 
  -2   0  -1   12.40    3.70 
   2   0   1   13.90    3.70 
   2   0   1   17.70    3.90 
  -2   0  -1   12.20    3.80 
  -2   0  -1    8.90    3.10 
   2   0   1    7.90    2.90 
   2   0   1    9.40    3.10 
   2   0   2 1000.10   36.50 
  -2   0  -2  928.11   34.20 
   2   0   2  944.01   38.00 
  -2   0  -2  954.20   37.80 
  -2   0  -2  991.60   36.70 
  -2   0  -2  979.40   34.10 
   2   0   2  967.90   34.30 
   2   0   3    8.90    5.70 
  -2   0  -3    8.90    5.50 
  -2   0  -3   18.50    6.00 
   2   0   3   -0.10    5.00 
   2   0   3    1.60    2.60 
   2   0   3   13.10    5.60 
  -2   0  -3   11.10    5.50 
   2   0   4 1151.28   45.40 
   2   0   4 1230.78   47.50 
  -2   0  -4 1159.78   41.60 
   2   0   4 1106.69   41.20 
   2   0   4 1086.29   41.40 
  -2   0  -4 1200.58   46.10 
   2   0   4 1146.99   42.90 
  -2   0  -4 1059.69   41.10 
  -2   0  -5   -2.60    5.80 
   2   0   5   -2.60    5.60 
  -2   0  -5    1.90    5.70 
   2   0   5   -0.60    4.70 
   2   0   5    1.80    6.30 
  -2   0  -5   -3.70    6.00 
   2   0   5    3.00    6.10 
  -2   0  -5   -6.30    5.40 
   2   0   6  384.96   19.50 
   2   0   6  383.26   24.30 
   2   0   6  377.56   21.40 
   2   0   6  389.36   18.90 
  -2   0  -6  367.46   18.50 
  -2   0  -6  377.86   18.40 
  -2   0  -6  371.96   24.50 
  -2   0  -6  378.26   18.90 
   2   0   7   -0.20    7.10 
   2   0   7   -6.10    6.00 
   2   0   7    8.20    7.60 
  -2   0  -7    5.50    6.40 
  -2   0  -7    9.80    6.90 
  -2   0  -7   -1.40    7.20 
   2   0   7    5.70    6.10 
  -2   0  -7    2.90    6.50 
   2   0   8 1137.59   52.39 
  -2   0  -8 1199.78   45.20 
   2   0   8 1129.79   49.00 
  -2   0  -8 1144.49   52.79 
  -2   0  -8 1167.38   45.00 
   2   0   8 1180.88   45.70 
  -2   0  -8 1120.19   44.40 
   2   0   9    3.00    8.00 
  -2   0  -9   -2.90    7.40 
  -2   0  -9    6.00    7.40 
   2   0   9    2.80    7.10 
  -2   0  -9    7.00    7.70 
  -2   0 -10  665.73   31.50 
  -2   0 -10  683.03   31.50 
   2   0  10  667.03   36.80 
   2   0  10  666.23   32.20 
  -2   0 -10  724.43   41.10 
  -2   0 -11   29.70    9.40 
   2   0  11   28.50   10.50 
   2   0  11   12.30    9.80 
  -2   0 -11   43.40   11.00 
  -2   0 -11   18.30   10.40 
   2   0  12   81.09   14.20 
  -2   0 -12  103.89   15.20 
   2   0  12  127.69   16.40 
  -2   0 -12  158.98   16.30 
  -2   0 -12   91.49   15.20 
   2   0  13   15.40   11.80 
  -2   0 -13    0.40   10.20 
   2   0  13   31.40   12.20 
  -2   0 -13   32.70   11.50 
  -2   0 -14    9.50   10.30 
  -2   0 -14   10.10   11.00 
   2   0  14   21.80   13.60 
   2   0  14   10.10   11.10 
  -2   0 -15   14.60   12.30 
  -2   0 -15   -7.50   10.60 
   2   0  15   17.00   12.20 
   2   0  15   23.10   13.70 
   2   0  16   91.99   18.40 
   2   0  16   97.69   19.40 
  -2   0 -16   75.59   16.10 
  -2   0 -16   76.79   15.50 
   2   0  17   -3.60   12.90 
  -2   0 -17  -12.30   10.10 
  -2   0 -17   17.40   13.50 
   2   0  17    8.70   14.20 
   2   0  18   39.50   16.60 
   2   0  18    5.40   14.90 
  -2   0 -18   27.90   14.40 
   2   0  19   -9.10   14.50 
   2   0  19   -9.70   15.10 
  -2   0 -19   12.60   13.10 
  -2   0 -20   53.49   17.00 
   2   0  20   48.90   18.30 
   2   0  20   -3.50   17.60 
   2   2 -20   24.00   16.70 
  -2   2  20   19.50   16.00 
  -2   2  20   -5.00   17.50 
   2  -2 -20   43.70   15.70 
  -2  -2  20    9.30   19.10 
  -2  -2  20   24.50   15.80 
  -2   2  19    5.20   17.50 
   2   2 -19   32.40   16.70 
  -2   2  19    8.70   15.20 
  -2  -2  19   11.70   14.00 
  -2  -2  19    2.60   16.80 
   2  -2 -19   24.20   14.40 
  -2   2  18   19.40   17.50 
   2   2 -18   29.00   16.10 
  -2   2  18   35.80   15.20 
   2  -2 -18   31.60   14.70 
  -2  -2  18   16.60   17.10 
  -2  -2  18   37.00   16.10 
  -2   2  17    4.50   15.40 
  -2   2  17   25.70   14.50 
   2   2 -17    7.80   13.80 
   2  -2 -17   37.10   14.80 
  -2  -2  17   14.70   14.00 
  -2  -2  17   19.60   16.10 
  -2   2  16   36.30   14.10 
  -2   2  16   23.10   15.70 
   2   2 -16   36.40   14.00 
  -2  -2  16   54.39   15.30 
   2  -2 -16   57.79   13.60 
  -2  -2  16   41.30   16.30 
  -2   2  15   62.39   16.60 
   2   2 -15   52.99   14.40 
  -2   2  15   56.99   16.60 
  -2  -2  15   23.20   13.40 
  -2  -2  15   51.19   15.80 
   2  -2 -15   63.59   13.70 
  -2   2  14  267.87   23.00 
  -2   2  14  271.07   31.50 
   2   2 -14  292.57   22.20 
  -2  -2  14  280.77   22.90 
   2  -2 -14  241.98   19.70 
  -2  -2  14  252.17   31.00 
   2   2 -13  215.68   20.60 
   2   2 -13  206.08   16.10 
  -2   2  13  149.49   20.40 
  -2   2  13  224.18   20.00 
  -2  -2  13  147.49   20.20 
   2  -2 -13  212.28   18.30 
   2  -2 -13  226.88   18.80 
  -2  -2  13  241.18   20.20 
  -2   2  12  105.39   14.90 
  -2   2  12   84.99   15.40 
   2   2 -12  114.89   15.40 
   2   2 -12   83.29   11.80 
  -2  -2  12   74.29   14.60 
   2  -2 -12   85.09   13.10 
   2  -2 -12  107.39   13.60 
  -2  -2  12  116.19   14.80 
  -2   2  11  531.75   33.80 
   2   2 -11  504.25   25.00 
   2   2 -11  501.55   26.70 
  -2   2  11  524.45   28.30 
   2  -2 -11  448.76   25.70 
  -2  -2  11  548.75   35.30 
  -2  -2  11  519.35   26.60 
   2  -2 -11  471.15   25.40 
  -2   2  10   80.89   13.80 
   2   2 -10  111.49   11.50 
   2   2 -10  111.19   13.50 
  -2   2  10  114.49   13.60 
   2  -2 -10  130.89   12.90 
  -2  -2  10  110.09   12.10 
   2  -2 -10   85.89   11.90 
  -2  -2  10   78.69   13.20 
   2   2  -9  107.89   10.90 
  -2   2   9   94.09   13.30 
   2   2  -9  128.89   13.70 
  -2   2   9  137.79   14.60 
  -2   2   9  117.69   10.80 
  -2  -2   9   81.59   12.80 
  -2  -2   9  109.59   10.90 
   2  -2  -9  105.59   12.20 
  -2  -2   9  117.99   11.60 
   2  -2  -9  131.89   12.40 
   2   2  -8  789.82   33.30 
  -2   2   8  924.91   42.60 
  -2   2   8  867.21   33.90 
  -2   2   8  834.82   35.60 
   2   2  -8  877.11   35.00 
  -2  -2   8  897.41   47.50 
  -2  -2   8  840.32   34.40 
   2  -2  -8  724.93   34.40 
  -2  -2   8  901.21   34.20 
   2  -2  -8  833.12   34.90 
  -2  -2   8  917.51   36.00 
   2  -2  -8  840.62   34.00 
  -2  -2   8  891.31   41.80 
   2   2  -7  315.47   17.80 
   2   2  -7  340.17   16.00 
  -2   2   7  325.27   23.10 
  -2   2   7  322.27   18.10 
   2   2  -7  331.77   16.10 
  -2   2   7  339.27   17.90 
  -2  -2   7  283.57   16.40 
   2  -2  -7  322.87   17.50 
   2  -2  -7  311.67   21.70 
  -2  -2   7  346.67   16.90 
  -2  -2   7  310.47   22.50 
  -2  -2   7  342.57   16.70 
   2  -2  -7  310.67   17.60 
   2  -2  -7  338.17   16.80 
  -2   2   6  796.32   32.40 
   2   2  -6  808.42   31.90 
  -2   2   6  824.12   37.40 
  -2   2   6  818.02   30.80 
   2   2  -6  873.21   30.70 
  -2   2   6  787.42   32.50 
   2  -2  -6  778.62   30.80 
  -2  -2   6  787.42   31.00 
  -2  -2   6  807.32   37.20 
   2  -2  -6  845.02   32.70 
   2  -2  -6  806.82   36.60 
   2  -2  -6  794.72   32.10 
  -2  -2   6  855.81   31.00 
   2   2  -5 2073.99   65.79 
  -2   2   5 1944.11   66.29 
  -2   2   5 2003.70   67.89 
  -2   2   5 1962.70   67.59 
  -2   2   5 1891.21   71.79 
   2   2  -5 1950.60   67.59 
  -2  -2   5 1896.51   65.79 
   2  -2  -5 1949.80   67.69 
  -2  -2   5 1918.71   66.09 
  -2  -2   5 1882.91   71.49 
   2  -2  -5 1899.81   67.49 
   2  -2  -5 1922.41   71.49 
   2  -2  -5 1957.30   66.29 
   2   2  -4 5935.51  225.18 
  -2   2   4 7103.99  231.28 
   2   2  -4 6767.02  227.28 
  -2   2   4 6850.11  226.08 
  -2   2   4 7063.19  227.68 
  -2   2   4 7235.18  227.68 
  -2   2   4 7241.08  231.98 
   2   2  -4 7010.80  230.78 
   2  -2  -4 7005.00  227.48 
  -2  -2   4 6858.61  225.88 
  -2  -2   4 7065.19  227.38 
   2  -2  -4 7224.48  231.08 
   2  -2  -4 6787.52  226.08 
   2  -2  -4 7329.87  227.78 
  -2  -2   4 6849.81  230.68 
  -2   2   3  544.15   23.90 
   2   2  -3  524.55   23.40 
   2   2  -3  521.55   18.70 
  -2   2   3  465.55   20.90 
  -2   2   3  528.55   21.10 
  -2   2   3  564.84   25.00 
   2   2  -3  493.95   18.60 
  -2   2   3  554.14   23.80 
   2   2  -3  524.15   20.50 
  -2   2   3  516.85   19.50 
  -2  -2   3  519.55   23.70 
   2  -2  -3  501.05   21.00 
  -2  -2   3  525.75   19.20 
  -2  -2   3  546.65   19.00 
   2  -2  -3  513.15   20.90 
  -2   2   2 1849.11   60.69 
  -2   2   2 1773.02   60.79 
   2   2  -2 1835.82   60.59 
  -2   2   2 1807.62   60.79 
  -2   2   2 1860.21   62.89 
   2   2  -2 1912.71   62.49 
   2   2  -2 1655.83   58.59 
  -2   2   2 1800.82   63.39 
   2   2  -2 1810.02   58.69 
   2  -2  -2 1856.51   60.89 
   2  -2  -2 1802.02   62.59 
  -2  -2   2 1609.24   58.79 
  -2  -2   2 1680.23   60.59 
   2  -2  -2 1864.71   60.79 
  -2  -2   2 1810.12   58.89 
  -2  -2   2 1840.52   62.49 
  -2   2   1  274.07   14.50 
  -2   2   1  266.07   11.00 
   2   2  -1  257.97   11.70 
   2   2  -1  286.57   14.20 
  -2   2   1  285.87   12.10 
   2   2  -1  270.67   12.00 
   2   2  -1  279.77    9.80 
  -2   2   1  251.57   11.90 
  -2   2   1  270.37   13.60 
   2  -2  -1  290.77   11.80 
   2  -2  -1  263.07   11.30 
   2  -2  -1  264.27   13.70 
  -2  -2   1  270.67   10.00 
  -2  -2   1  269.57   11.60 
  -2  -2   1  277.37   12.40 
   2  -2  -1  249.38   13.30 
  -2  -2   1  275.07   14.20 
  -2  -2   1  269.37    9.60 
   2   2   0  443.96   15.90 
   2   2   0  441.36   16.20 
  -2   2   0  453.25   17.20 
   2   2   0  441.56   17.00 
  -2   2   0  454.15   19.10 
   2   2   0  458.05   19.10 
  -2   2   0  487.95   20.00 
  -2   2   0  461.95   17.40 
  -2   2   0  433.16   16.60 
  -2  -2   0  433.26   15.90 
  -2  -2   0  443.06   16.00 
   2  -2   0  455.35   16.70 
   2  -2   0  485.15   18.90 
   2  -2   0  466.95   19.90 
   2  -2   0  458.05   17.30 
  -2  -2   0  479.85   19.70 
  -2  -2   0  421.56   17.00 
  -2  -2   0  408.06   18.60 
  -2  -2   0  442.26   16.30 
  -2   2  -1 2122.59   70.89 
   2   2   1 2156.58   70.99 
  -2   2  -1 2074.19   71.29 
   2   2   1 2097.79   71.09 
  -2   2  -1 2145.29   71.29 
  -2   2  -1 2210.68   74.99 
   2   2   1 2134.69   73.29 
   2  -2   1 2094.49   71.19 
   2  -2   1 2126.09   71.39 
  -2  -2  -1 2152.18   73.89 
   2  -2   1 2264.47   75.09 
  -2  -2  -1 2104.09   71.09 
  -2  -2  -1 2132.19   71.09 
   2  -2   1 2179.68   70.79 
  -2  -2  -1 2183.68   73.29 
   2   2   2  733.43   28.60 
  -2   2  -2  654.53   24.60 
   2   2   2  662.53   25.00 
   2   2   2  643.14   25.00 
   2   2   2  659.43   23.70 
  -2   2  -2  668.23   29.80 
  -2   2  -2  694.43   25.90 
  -2   2  -2  662.83   24.80 
  -2  -2  -2  658.23   25.00 
   2  -2   2  660.93   24.60 
   2  -2   2  652.43   24.90 
  -2  -2  -2  688.73   28.10 
  -2  -2  -2  701.93   29.20 
  -2  -2  -2  640.64   25.00 
   2  -2   2  672.83   25.70 
  -2  -2  -2  637.04   23.50 
   2   2   3   13.30    5.40 
  -2   2  -3    5.20    4.60 
   2   2   3   12.50    5.90 
   2   2   3    9.00    3.70 
  -2   2  -3    7.90    4.80 
   2   2   3   15.20    5.90 
  -2   2  -3    8.90    5.10 
   2   2   3   13.30    5.90 
  -2  -2  -3   15.00    4.90 
  -2  -2  -3   15.00    6.80 
   2  -2   3   20.70    5.30 
   2  -2   3   18.20    5.50 
  -2  -2  -3    4.40    3.30 
  -2  -2  -3    8.40    6.00 
   2  -2   3   14.90    5.60 
  -2  -2  -3   -2.00    5.20 
   2   2   4  226.28   16.60 
   2   2   4  189.88   11.90 
  -2   2  -4  233.78   12.40 
  -2   2  -4  248.48   13.30 
   2   2   4  233.38   13.80 
   2   2   4  218.78   18.10 
  -2   2  -4  246.08   15.70 
   2   2   4  220.58   13.50 
  -2   2  -4  232.28   12.90 
   2  -2   4  249.58   13.80 
   2  -2   4  239.18   15.70 
  -2  -2  -4  221.18   13.10 
  -2  -2  -4  243.68   19.40 
  -2  -2  -4  232.68   13.60 
  -2  -2  -4  212.18   13.20 
   2  -2   4  237.68   13.30 
   2   2   5  723.53   33.60 
  -2   2  -5  706.33   29.10 
  -2   2  -5  698.73   32.30 
   2   2   5  728.13   34.80 
   2   2   5  743.43   30.80 
  -2   2  -5  696.73   28.10 
   2   2   5  749.82   29.80 
  -2   2  -5  700.83   28.20 
  -2  -2  -5  727.13   28.00 
  -2  -2  -5  745.63   35.80 
  -2  -2  -5  770.02   29.50 
   2  -2   5  679.93   28.30 
   2  -2   5  739.83   32.60 
   2  -2   5  732.83   28.90 
  -2  -2  -5  741.23   29.60 
  -2  -2  -5  713.43   29.80 
  -2   2  -6  200.28   12.40 
   2   2   6  180.38   12.70 
  -2   2  -6  187.78   13.30 
  -2   2  -6  162.58   11.60 
  -2   2  -6  196.38   17.00 
   2   2   6  169.88   15.40 
   2   2   6  158.48   16.20 
   2  -2   6  175.68   12.20 
  -2  -2  -6  191.28   13.80 
   2  -2   6  177.28   18.20 
  -2  -2  -6  164.28   13.10 
  -2  -2  -6  193.08   11.80 
  -2  -2  -6  173.48   13.30 
   2  -2   6  178.18   12.80 
  -2  -2  -6  177.68   19.60 
  -2   2  -7  486.05   22.10 
   2   2   7  490.55   25.80 
  -2   2  -7  495.35   28.30 
   2   2   7  479.45   23.90 
  -2   2  -7  448.26   22.80 
  -2   2  -7  484.45   22.80 
   2   2   7  458.15   29.80 
  -2  -2  -7  553.84   32.00 
  -2  -2  -7  472.85   23.20 
   2  -2   7  490.75   23.20 
  -2  -2  -7  507.25   23.80 
   2  -2   7  454.75   28.10 
   2  -2   7  488.95   22.50 
   2  -2   7  477.25   27.10 
  -2  -2  -7  491.65   21.80 
   2   2   8   85.39   11.60 
  -2   2  -8   87.39   10.00 
  -2   2  -8   49.40   10.10 
   2   2   8   53.19    9.30 
  -2   2  -8   90.49   12.10 
  -2   2  -8   81.79   11.40 
   2  -2   8   90.19   11.20 
   2  -2   8   57.89   11.20 
  -2  -2  -8  102.79   10.60 
  -2  -2  -8   85.39   11.40 
  -2  -2  -8   96.59   11.40 
   2  -2   8   95.89   12.80 
  -2  -2  -8   53.49   10.20 
   2  -2   8   62.89   10.30 
  -2   2  -9  218.78   15.70 
  -2   2  -9  171.68   21.00 
   2   2   9  200.58   19.30 
  -2   2  -9  196.08   16.00 
   2   2   9  202.88   16.90 
  -2  -2  -9  232.18   16.90 
  -2  -2  -9  200.78   15.80 
   2  -2   9  229.98   17.30 
   2  -2   9  188.48   19.60 
  -2  -2  -9  200.08   14.50 
  -2  -2  -9  225.98   24.30 
  -2   2 -10  102.19   12.30 
   2   2  10   77.69   13.00 
   2   2  10   48.90   10.50 
  -2   2 -10   72.59   12.40 
   2  -2  10   65.79   11.30 
  -2  -2 -10   65.99   11.50 
   2  -2  10   48.50   10.70 
  -2  -2 -10   44.60   12.10 
  -2  -2 -10   91.99   12.00 
   2   2  11   52.39   12.30 
  -2   2 -11   55.39   10.80 
  -2   2 -11   44.40   11.20 
   2   2  11   33.40   10.10 
   2  -2  11   41.20   11.10 
   2  -2  11   35.40   10.50 
  -2  -2 -11   52.89   10.60 
  -2  -2 -11   47.80   11.10 
  -2  -2 -11   25.70   11.70 
   2   2  12   48.10   12.00 
  -2   2 -12   70.29   11.60 
  -2   2 -12   71.99   13.40 
   2   2  12   74.29   13.70 
  -2  -2 -12   71.59   12.60 
  -2  -2 -12   44.80   13.50 
   2  -2  12   43.30   12.10 
   2  -2  12   79.49   13.80 
  -2  -2 -12   54.79   12.50 
  -2   2 -13   27.60   11.70 
  -2   2 -13   39.30   11.00 
   2   2  13   25.30   11.10 
   2   2  13   36.80   13.20 
   2  -2  13   23.10   12.00 
   2  -2  13   32.90   11.80 
  -2  -2 -13   35.50   11.80 
  -2  -2 -13   13.30   11.70 
  -2  -2 -13   12.90   10.70 
  -2   2 -14   13.80   10.90 
   2   2  14   22.80   13.20 
  -2   2 -14   26.20   11.30 
   2   2  14   15.30   12.60 
   2  -2  14   26.30   12.50 
  -2  -2 -14   19.30   10.90 
  -2  -2 -14   28.70   11.10 
   2  -2  14   12.60   11.60 
   2   2  15   20.20   14.60 
  -2   2 -15   31.80   11.50 
  -2   2 -15   21.60   12.70 
   2   2  15   51.79   16.30 
  -2  -2 -15   39.60   12.30 
  -2  -2 -15   36.50   12.20 
   2  -2  15   30.10   15.20 
   2  -2  15    8.80   12.00 
  -2   2 -16   30.80   11.60 
  -2   2 -16   42.00   14.10 
   2   2  16   14.70   13.70 
   2   2  16   45.00   15.50 
   2  -2  16   29.50   14.70 
  -2  -2 -16   34.10   13.40 
   2  -2  16   46.60   15.50 
  -2  -2 -16   45.30   14.70 
   2   2  17   79.19   18.50 
   2   2  17   48.40   16.80 
  -2   2 -17   65.89   16.90 
   2  -2  17   76.99   17.30 
  -2  -2 -17   69.79   15.30 
  -2  -2 -17   76.09   16.50 
   2  -2  17   47.70   18.10 
   2   2  18   -3.30   14.70 
  -2   2 -18    3.70   12.50 
   2   2  18   30.50   16.00 
  -2  -2 -18   18.30   12.70 
   2  -2  18   -9.20   13.80 
   2  -2  18   16.50   16.10 
  -2   2 -19   31.40   15.50 
   2   2  19  -25.30   14.00 
   2   2  19   -0.10   14.50 
   2  -2  19   16.40   17.50 
  -2  -2 -19   27.80   15.00 
   2  -2  19    3.90   14.90 
   2   2  20   30.80   21.20 
  -2   2 -20   21.90   15.80 
   2   2  20  -19.10   16.00 
   2  -2  20  -11.80   16.60 
   2  -2  20   23.50   18.10 
  -2  -2 -20    8.80   13.60 
   2   4 -20   28.20   15.80 
  -2   4  20   -8.50   14.10 
  -2   4  20  -19.30   17.20 
   2  -4 -20    4.20   12.40 
  -2  -4  20    7.20   13.20 
  -2  -4  20    0.70   18.10 
  -2   4  19   37.10   18.60 
   2   4 -19   46.10   16.80 
  -2   4  19   19.50   18.90 
   2  -4 -19   29.50   13.70 
  -2  -4  19   34.90   19.60 
  -2  -4  19   33.20   16.10 
  -2   4  18   -2.60   15.80 
  -2   4  18   16.10   14.30 
   2   4 -18    6.80   13.90 
  -2  -4  18   -8.40   14.70 
   2  -4 -18    1.20   11.50 
  -2  -4  18   -9.20   12.70 
   2   4 -17   71.79   17.10 
  -2   4  17   31.80   17.40 
  -2   4  17   54.49   16.60 
   2  -4 -17   64.89   14.90 
  -2  -4  17   26.70   15.40 
  -2  -4  17   47.50   14.50 
   2   4 -16   10.10   12.40 
  -2   4  16    7.40   14.40 
  -2   4  16   11.90   13.60 
  -2  -4  16    3.90   13.50 
   2  -4 -16   11.80   11.70 
  -2  -4  16   29.10   12.70 
  -2   4  15  116.09   20.70 
  -2   4  15  147.29   20.20 
   2   4 -15  208.58   22.70 
   2  -4 -15  170.68   18.60 
  -2  -4  15  218.58   20.80 
  -2  -4  15  108.09   20.50 
  -2   4  14   23.00   12.70 
  -2   4  14   25.50   13.80 
   2   4 -14   20.20   12.20 
  -2  -4  14   28.00   13.60 
   2  -4 -14   40.00   11.40 
  -2  -4  14   43.80   12.70 
  -2   4  13   72.69   15.90 
  -2   4  13   80.99   15.30 
   2   4 -13   83.19   10.90 
   2   4 -13   99.39   16.00 
   2  -4 -13   86.09   15.50 
  -2  -4  13   88.99   13.60 
  -2  -4  13   45.40   14.40 
   2  -4 -13   70.79   12.70 
   2   4 -12   -0.20    5.90 
  -2   4  12   -2.90    9.00 
   2   4 -12   -3.40    9.50 
  -2   4  12   -3.00   10.10 
  -2  -4  12    9.30    8.80 
   2  -4 -12   -0.80    7.40 
  -2  -4  12   -4.10    9.80 
   2  -4 -12    3.90    9.20 
   2   4 -11  308.07   18.60 
  -2   4  11  369.56   29.70 
   2   4 -11  365.56   22.80 
  -2   4  11  364.56   24.30 
  -2  -4  11  367.86   30.30 
   2  -4 -11  360.16   20.20 
  -2  -4  11  373.96   21.20 
   2  -4 -11  355.96   23.50 
  -2   4  10  183.28   12.70 
  -2   4  10  210.08   22.70 
   2   4 -10  149.09   11.90 
   2   4 -10  166.58   15.70 
  -2   4  10  187.98   16.70 
   2  -4 -10  174.08   16.00 
  -2  -4  10  114.89   16.00 
   2  -4 -10  191.48   13.80 
  -2  -4  10  178.28   14.30 
   2   4  -9  762.72   32.40 
   2   4  -9  851.51   36.50 
  -2   4   9  876.21   43.00 
  -2   4   9  858.81   37.10 
  -2   4   9  856.21   33.50 
   2  -4  -9  810.92   33.10 
  -2  -4   9  854.81   42.90 
  -2  -4   9  871.41   34.30 
  -2  -4   9  894.51   34.30 
   2  -4  -9  781.32   36.20 
  -2   4   8   17.50    8.60 
   2   4  -8   24.60    5.70 
  -2   4   8   44.30    9.50 
   2   4  -8    8.50    8.20 
  -2  -4   8   25.30    6.80 
   2  -4  -8   21.00    6.70 
  -2  -4   8   18.00    8.20 
   2  -4  -8   20.20    7.80 
  -2  -4   8   13.80    6.50 
   2  -4  -8   25.90    8.50 
  -2   4   7 1634.44   60.39 
  -2   4   7 1588.84   57.09 
  -2   4   7 1724.73   67.29 
   2   4  -7 1595.74   56.49 
  -2   4   7 1664.23   65.99 
   2   4  -7 1646.54   60.19 
   2   4  -7 1565.74   56.39 
  -2   4   7 1628.04   60.59 
  -2  -4   7 1605.24   59.79 
   2  -4  -7 1722.33   65.39 
  -2  -4   7 1634.34   57.39 
   2  -4  -7 1636.74   57.39 
  -2  -4   7 1657.43   57.79 
   2  -4  -7 1678.13   60.49 
   2  -4  -7 1682.03   60.89 
  -2  -4   7 1599.44   65.79 
   2   4  -6   73.59    6.60 
  -2   4   6   49.80    9.10 
  -2   4   6   71.69    9.90 
  -2   4   6   41.10    9.30 
   2   4  -6   75.19    6.10 
   2   4  -6   70.49   10.30 
  -2   4   6   68.79    7.10 
   2  -4  -6   79.09    7.70 
   2  -4  -6   57.79    8.40 
  -2  -4   6   38.50    7.40 
   2  -4  -6   71.19    9.50 
  -2  -4   6   73.59    7.20 
  -2  -4   6   67.79    6.80 
  -2  -4   6   53.19    9.20 
   2  -4  -6   52.29    9.20 
  -2   4   5 1110.89   46.70 
  -2   4   5 1089.69   42.40 
  -2   4   5 1108.39   39.50 
   2   4  -5 1145.59   42.30 
   2   4  -5 1147.19   38.40 
  -2  -4   5 1125.79   39.30 
   2  -4  -5 1115.29   39.60 
   2  -4  -5 1184.38   42.60 
  -2  -4   5 1120.29   38.80 
   2  -4  -5 1158.68   42.70 
  -2  -4   5 1116.89   46.40 
   2  -4  -5 1118.69   45.80 
  -2   4   4  175.28   16.60 
   2   4  -4  160.78    6.90 
  -2   4   4  172.28   12.20 
  -2   4   4  190.08   15.50 
  -2   4   4  168.48    8.90 
   2   4  -4  159.78   11.50 
   2   4  -4  170.28    6.90 
  -2   4   4  167.48   13.40 
  -2  -4   4  182.28   13.90 
   2  -4  -4  178.18   12.20 
  -2  -4   4  167.58    8.40 
  -2  -4   4  141.89   12.10 
   2  -4  -4  176.58   14.90 
   2  -4  -4  180.58   15.70 
   2  -4  -4  167.28   11.90 
   2   4  -3  335.07   15.20 
  -2   4   3  328.97   15.70 
  -2   4   3  329.07   17.00 
  -2   4   3  350.36   20.50 
  -2   4   3  341.97   16.60 
  -2   4   3  329.47   18.90 
  -2   4   3  349.37   16.30 
  -2   4   3  323.07   16.30 
  -2   4   3  323.57   13.20 
  -2  -4   3  327.57   15.60 
  -2  -4   3  329.77   18.50 
   2  -4  -3  326.97   16.10 
  -2  -4   3  330.17   12.10 
  -2  -4   3  335.67   12.10 
   2  -4  -3  373.46   16.80 
  -2  -4   3  336.77   16.70 
   2  -4  -3  342.07   19.20 
   2  -4  -3  356.06   18.80 
  -2   4   2  531.65   23.60 
   2   4  -2  574.44   21.80 
  -2   4   2  591.54   26.30 
  -2   4   2  535.65   22.20 
  -2   4   2  528.55   22.60 
  -2   4   2  562.54   22.30 
   2   4  -2  550.74   22.90 
  -2   4   2  533.45   22.80 
   2  -4  -2  539.15   22.40 
   2  -4  -2  543.05   22.40 
   2  -4  -2  536.65   22.00 
   2  -4  -2  586.24   25.60 
  -2  -4   2  562.84   21.70 
  -2  -4   2  545.65   22.60 
  -2   4   1  980.20   34.70 
  -2   4   1  991.90   34.40 
  -2   4   1  931.51   34.40 
  -2   4   1  880.51   37.20 
  -2   4   1  944.91   34.00 
   2   4  -1 1007.90   35.20 
  -2   4   1  993.20   35.40 
  -2  -4   1  908.41   31.30 
  -2  -4   1  972.30   36.40 
  -2  -4   1  870.51   34.50 
   2  -4  -1  951.80   35.10 
   2  -4  -1  934.61   34.00 
   2  -4  -1  936.51   34.10 
   2  -4  -1  972.80   34.70 
  -2  -4   1  962.70   36.70 
  -2  -4   1  914.41   33.30 
  -2   4   0   56.39    6.30 
   2   4   0   28.50    5.60 
  -2   4   0   58.09    6.20 
  -2   4   0   53.59    7.10 
   2   4   0   49.80    4.80 
   2   4   0   45.90    7.50 
   2   4   0   44.50    3.60 
  -2   4   0   33.70    5.50 
  -2   4   0   48.80    5.10 
  -2  -4   0   46.20    7.00 
  -2  -4   0   37.40    6.10 
  -2  -4   0   45.10    4.30 
  -2  -4   0   30.80    4.30 
   2  -4   0   46.60    6.70 
   2  -4   0   32.70    5.30 
   2  -4   0   47.50    6.20 
  -2  -4   0   48.00    4.90 
   2  -4   0   52.59    6.30 
  -2   4  -1 1254.37   44.20 
  -2   4  -1 1303.87   45.60 
  -2   4  -1 1286.37   44.10 
   2   4   1 1279.97   43.90 
   2   4   1 1118.29   47.40 
   2   4   1 1254.47   43.60 
   2   4   1 1277.27   46.10 
   2   4   1 1187.58   45.00 
  -2   4  -1 1364.16   48.80 
  -2  -4  -1 1284.07   47.80 
  -2  -4  -1 1302.67   44.00 
   2  -4   1 1296.27   44.60 
   2  -4   1 1324.17   44.20 
   2  -4   1 1249.28   45.40 
  -2  -4  -1 1238.18   43.90 
   2  -4   1 1410.86   48.90 
  -2  -4  -1 1351.86   43.40 
   2   4   2 1697.43   56.89 
  -2   4  -2 1687.73   56.19 
  -2   4  -2 1701.63   56.39 
   2   4   2 1663.03   55.99 
   2   4   2 1598.44   61.09 
   2   4   2 1556.64   57.89 
   2   4   2 1655.83   56.79 
   2  -4   2 1669.73   58.29 
  -2  -4  -2 1668.73   57.09 
  -2  -4  -2 1683.93   58.29 
  -2  -4  -2 1729.83   61.89 
   2  -4   2 1624.94   61.39 
   2  -4   2 1641.44   56.29 
   2  -4   2 1615.94   55.49 
  -2  -4  -2 1652.53   56.89 
   2  -4   2 1647.34   56.49 
  -2  -4  -2 1666.93   55.69 
   2   4   3  344.67   19.70 
  -2   4  -3  356.96   15.70 
   2   4   3  360.86   16.50 
   2   4   3  403.76   19.70 
   2   4   3  356.86   17.50 
   2   4   3  368.76   16.80 
  -2   4  -3  347.87   16.20 
  -2   4  -3  355.46   15.80 
  -2  -4  -3  339.27   16.80 
   2  -4   3  360.96   22.40 
   2  -4   3  354.76   15.90 
   2  -4   3  386.66   17.00 
  -2  -4  -3  354.56   17.10 
  -2  -4  -3  360.76   19.00 
  -2  -4  -3  350.96   16.00 
   2  -4   3  368.06   15.80 
  -2  -4  -3  358.16   22.90 
   2   4   4  428.16   19.60 
   2   4   4  441.86   20.10 
   2   4   4  477.85   22.80 
   2   4   4  421.96   20.10 
  -2   4  -4  415.96   19.90 
  -2   4  -4  442.96   18.50 
  -2   4  -4  443.26   18.60 
  -2  -4  -4  418.46   25.90 
  -2  -4  -4  417.06   20.10 
   2  -4   4  446.46   21.00 
   2  -4   4  438.66   18.80 
   2  -4   4  436.66   18.90 
  -2  -4  -4  452.15   19.70 
  -2  -4  -4  426.16   20.00 
  -2   4  -5  635.64   24.70 
   2   4   5  652.93   27.50 
   2   4   5  672.63   29.90 
  -2   4  -5  637.84   26.50 
   2   4   5  586.14   26.60 
  -2   4  -5  607.54   24.70 
  -2  -4  -5  607.54   26.50 
  -2  -4  -5  638.54   27.00 
   2  -4   5  605.54   24.90 
  -2  -4  -5  599.04   26.40 
   2  -4   5  576.74   24.90 
  -2  -4  -5  581.44   32.80 
   2  -4   5  621.74   28.50 
   2   4   6  147.19   14.40 
  -2   4  -6  114.89   12.10 
   2   4   6  145.89   12.20 
  -2   4  -6  127.29   10.50 
   2   4   6  141.79   15.70 
   2   4   6  137.59   13.10 
  -2   4  -6  124.19   10.60 
  -2  -4  -6  143.79   16.90 
  -2  -4  -6  149.59   13.10 
  -2  -4  -6  137.29   10.10 
   2  -4   6  115.29   10.80 
  -2  -4  -6  144.19   12.80 
  -2  -4  -6  140.99   12.80 
   2  -4   6  127.89   10.50 
   2  -4   6  136.49   15.80 
   2   4   7 1457.75   55.99 
  -2   4  -7 1467.05   55.39 
  -2   4  -7 1477.05   53.49 
   2   4   7 1504.05   58.09 
   2   4   7 1356.36   55.59 
  -2   4  -7 1443.16   53.29 
   2  -4   7 1566.54   60.09 
   2  -4   7 1545.75   54.99 
  -2  -4  -7 1495.25   56.09 
  -2  -4  -7 1513.55   56.29 
   2  -4   7 1461.45   53.99 
  -2  -4  -7 1480.95   57.19 
  -2  -4  -7 1462.45   64.19 
  -2  -4  -7 1529.55   53.09 
  -2   4  -8   75.49   11.70 
   2   4   8   59.99    9.70 
   2   4   8  107.69   12.80 
  -2   4  -8   93.99    9.90 
   2   4   8   51.59    9.00 
   2  -4   8   60.39   10.20 
  -2  -4  -8   89.49    9.80 
   2  -4   8   57.49   10.60 
   2  -4   8  102.29   11.50 
  -2  -4  -8   60.89   11.90 
  -2  -4  -8   94.29   12.10 
  -2  -4  -8   84.29   12.00 
  -2  -4  -8   59.99    8.90 
   2  -4   8   86.79   10.20 
  -2   4  -9  200.58   16.40 
   2   4   9  204.88   17.20 
  -2   4  -9  207.78   14.40 
   2   4   9  171.28   18.80 
  -2  -4  -9  200.28   16.50 
   2  -4   9  180.98   23.80 
  -2  -4  -9  187.68   13.90 
  -2  -4  -9  211.68   17.00 
   2  -4   9  219.88   21.10 
  -2  -4  -9  207.18   17.30 
  -2  -4  -9  202.38   24.30 
   2  -4   9  226.28   15.90 
   2   4  10  114.09   14.90 
  -2   4 -10  131.69   12.50 
  -2   4 -10  125.99   14.80 
   2   4  10   85.79   12.60 
  -2  -4 -10   83.79   13.70 
   2  -4  10   97.69   13.10 
  -2  -4 -10  113.19   14.50 
   2  -4  10   67.09   12.30 
  -2  -4 -10  124.69   12.20 
  -2   4 -11  117.19   12.70 
   2   4  11  128.09   16.30 
   2   4  11   97.19   14.70 
  -2   4 -11  103.09   15.00 
   2  -4  11   87.59   14.20 
   2  -4  11  115.59   14.60 
  -2  -4 -11   82.39   14.90 
  -2  -4 -11  108.39   15.10 
  -2  -4 -11   99.09   12.70 
   2   4  12    5.70    9.60 
  -2   4 -12   11.70   11.20 
  -2   4 -12   16.10    8.50 
   2   4  12    7.10   11.50 
   2  -4  12   12.30   10.00 
  -2  -4 -12   21.60    9.70 
  -2  -4 -12    1.30   10.70 
  -2  -4 -12   21.10   12.30 
   2  -4  12   11.80    9.60 
  -2   4 -13   86.99   12.90 
   2   4  13   77.09   16.00 
   2   4  13   81.29   15.80 
  -2   4 -13   81.59   15.20 
   2  -4  13   81.49   14.50 
  -2  -4 -13   91.79   15.50 
  -2  -4 -13   68.59   16.60 
  -2  -4 -13   93.19   13.80 
   2  -4  13   64.79   14.60 
  -2   4 -14   13.10   11.90 
   2   4  14   10.10   12.80 
  -2   4 -14   10.10    9.10 
   2   4  14   26.80   13.70 
  -2  -4 -14   28.00   11.00 
  -2  -4 -14   17.20   13.70 
   2  -4  14   11.40   12.00 
   2  -4  14   13.40   11.50 
  -2  -4 -14   10.40   11.00 
   2   4  15   35.80   15.30 
  -2   4 -15   29.60   10.80 
   2   4  15   25.80   14.10 
  -2   4 -15   22.30   13.20 
  -2  -4 -15   31.80   12.50 
   2  -4  15   18.30   14.00 
  -2  -4 -15   41.30   11.90 
   2  -4  15   28.60   13.70 
   2   4  16    9.00   13.40 
   2   4  16   29.10   15.20 
  -2   4 -16   18.80   13.00 
   2  -4  16    9.00   12.70 
  -2  -4 -16    9.50   11.50 
   2  -4  16   18.50   14.30 
  -2  -4 -16   24.70   14.20 
   2   4  17   58.29   18.20 
  -2   4 -17   42.40   15.70 
   2   4  17   34.30   16.20 
  -2  -4 -17   40.00   14.50 
  -2  -4 -17   63.49   14.90 
   2  -4  17   38.60   16.30 
   2  -4  17   50.89   15.50 
  -2   4 -18   39.30   15.30 
   2   4  18   51.79   19.70 
   2   4  18   -1.90   15.20 
   2  -4  18   34.50   16.40 
  -2  -4 -18   32.80   14.00 
  -2  -4 -18   45.90   14.00 
   2  -4  18   28.10   16.70 
   2   4  19    4.50   17.80 
   2   4  19  -24.20   14.80 
  -2   4 -19   31.70   16.10 
  -2  -4 -19   11.50   13.60 
   2  -4  19   -1.90   15.30 
   2  -4  19   14.90   16.50 
  -2   4 -20    1.90   13.60 
   2   4  20  -10.60   16.80 
   2   4  20  -20.90   16.10 
   2  -4  20    3.50   15.70 
  -2  -4 -20    0.30   13.70 
   2  -4  20   -5.80   15.10 
   2   6 -20   10.60   15.40 
  -2   6  19    8.70   15.30 
  -2   6  19   -6.40   20.00 
   2   6 -19   24.60   16.20 
  -2  -6  19    4.10   17.20 
  -2  -6  19   30.40   15.50 
  -2   6  18    5.50   17.80 
   2   6 -18   18.20   15.10 
  -2   6  18   36.20   18.60 
  -2  -6  18   26.00   13.60 
  -2  -6  18    5.40   15.90 
   2  -6 -18   42.40   13.70 
   2   6 -17   21.70   14.70 
  -2   6  17   -4.10   16.70 
  -2   6  17   36.80   16.00 
  -2  -6  17   14.20   15.50 
   2  -6 -17   33.00   12.40 
  -2  -6  17   19.90   13.40 
   2   6 -16   68.59   16.40 
  -2   6  16   69.69   17.20 
  -2   6  16   32.40   17.40 
  -2  -6  16   78.39   19.20 
   2  -6 -16   86.99   14.00 
  -2  -6  16   58.89   14.70 
  -2   6  15   41.80   15.10 
  -2   6  15    5.70   14.50 
   2   6 -15   35.50   14.50 
  -2  -6  15   26.30   15.00 
  -2  -6  15   33.20   12.10 
   2  -6 -15   32.80   10.90 
   2   6 -14  161.98   19.40 
  -2   6  14  100.69   18.90 
  -2   6  14  167.58   20.50 
  -2  -6  14  140.79   16.60 
   2  -6 -14  162.18   16.60 
  -2  -6  14  105.19   19.20 
   2   6 -13   17.30   12.40 
   2   6 -13   12.10    7.30 
  -2   6  13   21.40   13.30 
  -2   6  13    0.70   11.10 
   2  -6 -13    6.00    8.30 
   2  -6 -13    8.60   10.70 
  -2  -6  13   -4.00   11.50 
  -2  -6  13   10.30    9.30 
  -2   6  12  215.58   20.10 
  -2   6  12  155.08   20.10 
   2   6 -12  199.78   13.50 
   2   6 -12  213.58   19.60 
  -2  -6  12  235.18   24.90 
   2  -6 -12  210.58   15.60 
  -2  -6  12  201.18   16.70 
   2  -6 -12  201.48   19.10 
  -2   6  11   17.80   10.40 
   2   6 -11    9.10   10.50 
  -2   6  11    7.00   10.30 
   2   6 -11   18.10    5.70 
  -2   6  11   11.70    7.20 
  -2  -6  11    0.40    9.40 
   2  -6 -11    4.80    6.70 
  -2  -6  11    9.60    7.80 
   2  -6 -11    0.70    9.30 
   2   6 -10  684.33   32.90 
  -2   6  10  726.43   40.60 
  -2   6  10  675.93   33.50 
  -2   6  10  696.43   28.80 
  -2  -6  10  667.53   29.50 
   2  -6 -10  800.22   34.80 
   2  -6 -10  641.54   28.40 
  -2  -6  10  616.84   38.80 
  -2   6   9  628.34   31.70 
   2   6  -9  670.13   31.60 
  -2   6   9  610.74   37.40 
   2  -6  -9  670.03   27.60 
  -2  -6   9  670.73   28.40 
   2  -6  -9  772.32   33.40 
   2  -6  -9  664.83   31.60 
  -2  -6   9  702.63   38.00 
  -2  -6   9  682.03   28.20 
  -2   6   8  303.87   26.00 
   2   6  -8  267.87   17.80 
  -2   6   8  242.38   18.10 
  -2   6   8  275.87   13.70 
   2  -6  -8  292.27   18.90 
   2  -6  -8  256.07   24.60 
  -2  -6   8  250.97   14.00 
   2  -6  -8  244.98   13.40 
   2  -6  -8  241.08   17.20 
  -2  -6   8  245.28   14.00 
  -2  -6   8  277.97   23.10 
  -2   6   7  128.89   13.30 
  -2   6   7  115.19   13.80 
   2   6  -7  127.69   13.30 
  -2   6   7   75.79   12.90 
  -2   6   7  124.79    8.80 
   2  -6  -7   77.39   12.40 
  -2  -6   7  123.99   15.20 
  -2  -6   7  112.19    8.50 
   2  -6  -7  107.89   12.80 
  -2  -6   7  124.79    9.30 
   2  -6  -7  134.09   13.10 
   2  -6  -7  102.09    8.60 
   2  -6  -7   79.69   11.00 
  -2   6   6  515.45   30.20 
  -2   6   6  536.75   25.20 
   2   6  -6  536.05   18.50 
  -2   6   6  545.25   24.70 
  -2   6   6  528.25   20.30 
   2   6  -6  522.25   24.50 
  -2   6   6  560.24   30.40 
  -2  -6   6  537.75   24.20 
   2  -6  -6  503.55   27.80 
  -2  -6   6  518.95   19.90 
  -2  -6   6  516.25   20.50 
  -2  -6   6  441.26   25.10 
  -2  -6   6  504.25   28.90 
   2  -6  -6  621.34   26.20 
   2  -6  -6  490.15   24.40 
   2  -6  -6  490.65   29.90 
  -2   6   5  270.27   11.90 
   2   6  -5  280.17   16.00 
  -2   6   5  270.57   16.50 
  -2   6   5  326.27   21.90 
  -2   6   5  260.67   16.60 
  -2   6   5  267.77   16.00 
  -2  -6   5  293.57   17.50 
   2  -6  -5  269.97   20.60 
   2  -6  -5  271.57   16.40 
  -2  -6   5  280.07   11.90 
  -2  -6   5  268.37   15.70 
   2  -6  -5  244.48   18.80 
   2  -6  -5  265.47   16.60 
  -2  -6   5  304.97   20.40 
  -2   6   4  577.34   29.40 
  -2   6   4  593.14   25.30 
   2   6  -4  570.74   24.50 
  -2   6   4  576.74   20.50 
  -2   6   4  587.34   25.10 
  -2   6   4  586.04   25.20 
  -2   6   4  566.84   28.40 
  -2  -6   4  580.54   20.00 
  -2  -6   4  606.04   24.60 
   2  -6  -4  567.24   28.20 
   2  -6  -4  581.04   25.10 
   2  -6  -4  612.14   25.60 
  -2  -6   4  477.25   25.30 
   2  -6  -4  581.44   29.30 
  -2   6   3  107.89    9.70 
   2   6  -3  104.49   12.00 
  -2   6   3  140.39   15.50 
   2   6  -3  123.29   10.00 
  -2   6   3  128.69   13.00 
  -2   6   3  124.79   10.80 
  -2   6   3  140.19   10.00 
  -2   6   3  126.69   11.10 
  -2   6   3  120.89   11.50 
  -2   6   3  123.59   10.60 
  -2  -6   3   99.39   11.00 
   2  -6  -3  114.79   10.30 
   2  -6  -3  113.99   13.60 
   2  -6  -3  125.89   11.10 
  -2  -6   3  107.29    9.50 
   2  -6  -3  105.29   13.40 
   2   6  -2 1083.49   42.40 
  -2   6   2 1115.69   40.60 
  -2   6   2 1161.48   42.90 
  -2   6   2 1136.29   40.90 
  -2   6   2 1177.18   42.70 
  -2   6   2 1111.29   40.50 
  -2   6   2 1142.89   45.00 
   2   6  -2 1111.59   40.30 
  -2   6   2 1084.59   40.80 
   2  -6  -2 1097.99   40.70 
   2  -6  -2 1106.29   44.30 
  -2  -6   2 1110.79   40.00 
   2  -6  -2 1079.29   41.00 
   2  -6  -2 1140.19   40.30 
   2  -6  -2 1072.19   42.20 
  -2  -6   2 1132.09   42.00 
   2  -6  -2 1131.79   40.80 
  -2   6   1  228.08   13.10 
   2   6  -1  212.28   14.20 
  -2   6   1  199.08   13.50 
  -2   6   1  189.18   12.30 
  -2   6   1  182.28   16.10 
  -2   6   1  233.18   13.90 
   2   6  -1  208.58   11.40 
  -2   6   1  199.28   12.00 
   2  -6  -1  229.38   12.30 
  -2  -6   1  205.08   10.90 
  -2  -6   1  219.68   13.70 
   2  -6  -1  216.48   12.40 
  -2  -6   1  203.28    7.70 
   2  -6  -1  221.18   13.50 
   2  -6  -1  221.28   12.70 
  -2  -6   1  215.78   14.70 
  -2  -6   1  210.58    7.70 
   2  -6  -1  231.68   16.50 
   2  -6  -1  239.78   12.60 
  -2  -6   1  196.28   13.40 
  -2  -6   1  203.18    8.80 
   2   6   0 1959.10   66.49 
   2   6   0 1876.71   61.19 
  -2   6   0 1824.52   66.29 
  -2   6   0 1904.91   63.99 
   2   6   0 1928.71   67.89 
  -2   6   0 1849.31   64.29 
  -2   6   0 1961.60   63.09 
  -2   6   0 1905.31   66.09 
   2   6   0 1892.11   61.19 
   2   6   0 1865.11   62.29 
  -2  -6   0 1790.72   64.99 
   2  -6   0 1918.01   66.29 
  -2  -6   0 1839.52   62.49 
  -2  -6   0 1890.71   66.49 
   2  -6   0 1898.81   65.99 
   2  -6   0 1791.62   64.19 
   2  -6   0 1863.01   68.09 
  -2  -6   0 1880.31   67.99 
  -2  -6   0 1831.82   62.69 
   2  -6   0 1882.41   62.89 
   2  -6   0 1868.91   64.29 
  -2  -6   0 1929.71   63.09 
  -2   6  -1  638.94   24.60 
   2   6   1  652.03   23.90 
  -2   6  -1  652.13   24.90 
   2   6   1  662.53   29.50 
   2   6   1  624.74   24.80 
  -2   6  -1  673.13   24.70 
   2   6   1  624.74   24.30 
   2   6   1  661.43   28.10 
  -2   6  -1  621.34   26.60 
   2  -6   1  659.43   29.20 
  -2  -6  -1  720.03   30.40 
   2  -6   1  675.83   25.20 
  -2  -6  -1  634.64   24.40 
  -2  -6  -1  657.53   25.20 
  -2  -6  -1  630.84   25.30 
   2  -6   1  656.03   27.30 
   2  -6   1  648.84   24.80 
  -2  -6  -1  663.83   24.60 
   2   6   2 2612.64   95.39 
  -2   6  -2 2704.93   94.99 
   2   6   2 2799.32   92.79 
   2   6   2 2465.25   92.39 
  -2   6  -2 2769.42   92.79 
   2   6   2 2705.73   92.39 
  -2   6  -2 2755.32   91.99 
  -2   6  -2 2672.13   91.59 
   2   6   2 2878.01   98.19 
   2   6   2 2853.61   92.49 
   2  -6   2 2828.52   95.19 
  -2  -6  -2 2747.23   92.89 
   2  -6   2 2797.92   90.19 
   2  -6   2 2834.82   97.89 
  -2  -6  -2 2623.44   92.39 
   2  -6   2 2774.12   92.09 
   2  -6   2 2829.22   92.49 
  -2  -6  -2 3006.40   98.99 
  -2  -6  -2 2794.62   92.79 
   2   6   3   32.60    4.70 
   2   6   3   54.79    7.90 
   2   6   3   54.79    7.70 
  -2   6  -3   58.49    6.10 
  -2   6  -3   60.29    8.10 
   2   6   3   32.30    7.00 
   2   6   3   40.40    5.70 
   2  -6   3   30.40    7.30 
  -2  -6  -3   32.00    4.50 
  -2  -6  -3   36.80    5.10 
   2  -6   3   43.50    7.30 
   2  -6   3   30.20    4.00 
   2  -6   3   57.09    6.30 
   2  -6   3   51.09    6.90 
  -2  -6  -3   57.59    7.90 
  -2  -6  -3   55.59    7.50 
  -2  -6  -3   41.60    8.70 
  -2   6  -4  684.73   25.40 
   2   6   4  735.33   28.90 
   2   6   4  674.13   27.90 
  -2   6  -4  658.63   27.70 
   2   6   4  722.23   29.40 
   2   6   4  681.33   27.40 
   2  -6   4  677.83   25.90 
   2  -6   4  614.84   26.00 
  -2  -6  -4  657.03   28.00 
  -2  -6  -4  631.14   34.00 
   2  -6   4  665.93   27.20 
  -2  -6  -4  642.84   27.70 
  -2  -6  -4  634.94   27.10 
  -2   6  -5   14.80    4.40 
   2   6   5   15.10    7.20 
  -2   6  -5   11.80    7.30 
   2   6   5    6.90    5.70 
   2   6   5    0.30    6.40 
  -2   6  -5   14.80    5.20 
   2   6   5   12.40    5.90 
   2   6   5    6.10    4.70 
  -2  -6  -5    2.70    6.80 
  -2  -6  -5    5.70    4.50 
   2  -6   5    5.90    5.30 
   2  -6   5   11.00    5.70 
  -2  -6  -5   16.90    6.40 
  -2  -6  -5    8.30    6.60 
   2  -6   5    6.20    4.50 
   2   6   6  770.32   33.10 
   2   6   6  776.22   35.20 
   2   6   6  732.73   32.40 
   2   6   6  772.12   39.90 
  -2   6  -6  796.32   32.80 
   2   6   6  764.82   33.80 
  -2   6  -6  763.22   29.80 
  -2   6  -6  786.12   29.50 
  -2  -6  -6  761.42   32.80 
  -2  -6  -6  795.32   41.40 
  -2  -6  -6  752.92   33.00 
  -2  -6  -6  723.53   32.50 
  -2  -6  -6  803.72   29.00 
   2  -6   6  751.22   30.60 
   2  -6   6  802.92   34.60 
   2  -6   6  788.22   31.00 
   2   6   7  339.57   20.20 
   2   6   7  351.86   22.20 
  -2   6  -7  346.27   16.40 
  -2   6  -7  308.17   19.30 
   2  -6   7  345.37   22.70 
   2  -6   7  314.77   17.00 
  -2  -6  -7  346.87   16.10 
  -2  -6  -7  357.16   20.30 
   2  -6   7  336.47   18.30 
  -2  -6  -7  321.57   19.50 
  -2  -6  -7  310.57   27.60 
  -2  -6  -7  317.77   19.50 
  -2   6  -8  147.79   12.80 
   2   6   8  159.08   18.30 
   2   6   8  153.28   15.30 
   2   6   8  165.78   17.60 
  -2   6  -8  153.98   11.50 
   2  -6   8  150.08   12.70 
  -2  -6  -8  165.48   16.50 
  -2  -6  -8  165.68   20.10 
   2  -6   8  152.88   12.10 
  -2  -6  -8  160.68   14.70 
  -2  -6  -8  138.49   14.70 
   2  -6   8  161.88   17.20 
  -2  -6  -8  154.58   11.10 
  -2   6  -9   41.20   11.00 
   2   6   9   41.20    9.80 
   2   6   9   57.09   11.60 
  -2   6  -9   52.49    8.00 
   2   6   9   35.00    7.70 
   2  -6   9   30.70    8.90 
  -2  -6  -9   51.39   11.00 
  -2  -6  -9   65.19    8.70 
   2  -6   9   66.79   10.20 
  -2  -6  -9   35.40   11.40 
  -2  -6  -9   39.90    7.90 
  -2  -6  -9   40.10   10.70 
   2   6  10  102.99   14.00 
   2   6  10  136.49   16.30 
  -2   6 -10  131.19   15.70 
  -2   6 -10  124.29   12.00 
  -2  -6 -10  166.98   17.00 
   2  -6  10   88.89   14.20 
  -2  -6 -10  135.39   16.10 
   2  -6  10  112.49   14.00 
  -2  -6 -10   95.59   15.10 
  -2  -6 -10  172.18   12.50 
  -2   6 -11   20.30    7.70 
   2   6  11   10.60    9.00 
  -2   6 -11   36.90   11.80 
   2   6  11   10.00   10.20 
  -2  -6 -11   25.00    8.40 
   2  -6  11   12.00    9.30 
  -2  -6 -11   14.60    9.60 
  -2  -6 -11   26.90   12.30 
   2  -6  11   29.80    9.80 
   2   6  12   64.69   14.70 
  -2   6 -12   54.19    9.40 
  -2   6 -12   56.89   12.20 
   2   6  12   29.90   11.20 
  -2  -6 -12   46.60   10.60 
  -2  -6 -12   61.09   14.20 
   2  -6  12   85.69   14.00 
  -2  -6 -12   44.80   13.00 
   2  -6  12   36.20   12.70 
  -2   6 -13   43.00    9.90 
   2   6  13   25.60   13.60 
   2   6  13   39.80   13.80 
  -2   6 -13   73.99   15.60 
   2  -6  13   50.99   12.60 
   2  -6  13   53.79   14.30 
  -2  -6 -13   40.10   13.40 
  -2  -6 -13   34.90   13.40 
  -2  -6 -13   52.99   11.30 
  -2   6 -14   67.79   10.90 
   2   6  14   57.29   15.70 
  -2   6 -14   72.09   15.40 
   2   6  14   51.99   15.70 
  -2  -6 -14   62.29   17.30 
  -2  -6 -14   60.89   14.80 
   2  -6  14   57.59   15.70 
  -2  -6 -14   70.29   12.90 
   2  -6  14   54.19   14.70 
   2   6  15    2.60   12.20 
  -2   6 -15    4.20   12.00 
   2   6  15   30.10   15.20 
  -2  -6 -15   29.30   13.60 
   2  -6  15   11.20   13.00 
   2  -6  15   12.20   11.60 
  -2  -6 -15   23.10   11.10 
  -2  -6 -15    8.40   14.10 
   2   6  16    3.10   14.60 
  -2   6 -16   17.10   14.10 
   2   6  16   22.00   15.30 
   2  -6  16   11.00   12.50 
  -2  -6 -16   26.50   14.80 
  -2  -6 -16   14.80   10.80 
   2  -6  16   23.80   14.60 
  -2   6 -17   26.30   16.10 
   2   6  17   -5.00   15.30 
   2   6  17   43.30   17.10 
  -2  -6 -17   12.70   11.30 
   2  -6  17   21.00   13.90 
  -2  -6 -17   31.90   14.50 
   2  -6  17    2.90   15.10 
   2   6  18   24.90   17.30 
   2   6  18   13.70   16.00 
  -2   6 -18   28.20   15.30 
  -2  -6 -18   37.30   14.10 
  -2  -6 -18   29.20   14.60 
   2  -6  18   24.40   18.60 
   2  -6  18   19.10   14.40 
  -2   6 -19   16.60   14.90 
   2   6  19   18.10   17.00 
   2   6  19  -19.00   15.40 
   2  -6  19   -8.40   15.00 
   2  -6  19    0.10   13.60 
  -2   8  19   36.80   18.70 
   2   8 -19   52.09   17.80 
  -2  -8  19   31.10   17.60 
  -2  -8  19   16.40   13.90 
  -2   8  18   87.49   20.70 
   2   8 -18   87.89   19.50 
  -2   8  18   22.60   20.00 
  -2  -8  18   59.29   15.10 
  -2  -8  18   64.69   21.10 
  -2   8  17  -12.60   18.00 
  -2   8  17   13.90   16.00 
   2   8 -17    4.90   14.20 
   2  -8 -17    7.10   16.00 
  -2  -8  17    8.30   12.30 
  -2  -8  17   14.30   12.80 
  -2   8  16  136.99   21.50 
   2   8 -16  153.88   21.90 
  -2   8  16   86.29   21.50 
   2  -8 -16  136.59   16.10 
  -2  -8  16  144.69   17.90 
  -2  -8  16  109.89   21.90 
  -2   8  15   33.00   14.70 
   2   8 -15   38.50   15.30 
  -2   8  15   -4.50   14.30 
  -2  -8  15   17.40   13.80 
   2  -8 -15   38.10   10.90 
  -2  -8  15   20.70   10.80 
  -2   8  14   68.99   18.00 
  -2   8  14   80.09   16.80 
   2   8 -14  125.69   19.20 
  -2  -8  14   74.39   17.60 
   2  -8 -14   92.49   12.70 
  -2  -8  14   97.89   14.20 
  -2   8  13    3.90   12.90 
  -2   8  13   -7.60   11.00 
   2   8 -13   -4.40   12.00 
  -2  -8  13    7.20    8.50 
   2  -8 -13    6.70    8.00 
   2  -8 -13    3.20   10.80 
  -2  -8  13    7.30   11.70 
   2   8 -12   26.90   10.50 
  -2   8  12   17.40   13.30 
  -2   8  12   30.20   13.00 
  -2  -8  12   33.00   13.00 
   2  -8 -12   32.10   13.10 
   2  -8 -12   17.90    8.40 
  -2  -8  12   31.60    9.20 
  -2   8  11   56.39   13.20 
   2   8 -11   42.30   12.50 
  -2   8  11   26.20    7.60 
  -2   8  11   22.10   12.60 
  -2  -8  11   25.20   11.10 
  -2  -8  11   36.00    8.50 
   2  -8 -11   31.00    7.80 
   2  -8 -11   31.70   11.60 
   2   8 -10   66.69   13.10 
  -2   8  10   45.00   13.30 
  -2   8  10   70.99   13.30 
   2  -8 -10   83.79    9.10 
  -2  -8  10   73.09    9.40 
   2  -8 -10   73.39   13.30 
  -2  -8  10   70.89    9.30 
  -2  -8  10   51.69   12.30 
   2  -8 -10   45.20   12.90 
   2   8  -9  110.99    7.80 
  -2   8   9   90.39   14.60 
  -2   8   9   93.79    8.60 
  -2   8   9  128.19   15.50 
   2   8  -9  121.29   14.20 
  -2  -8   9   74.29   13.20 
  -2  -8   9  105.89    9.90 
   2  -8  -9  130.69   14.80 
   2  -8  -9   84.89   14.20 
   2  -8  -9  117.49   14.90 
   2  -8  -9  102.19    9.20 
  -2  -8   9  102.09   10.30 
  -2   8   8  412.16   22.60 
  -2   8   8  381.46   16.70 
   2   8  -8  370.46   21.00 
   2   8  -8  342.97   15.20 
  -2   8   8  396.36   29.00 
   2  -8  -8  431.96   23.70 
  -2  -8   8  377.86   17.40 
  -2  -8   8  410.56   28.40 
   2  -8  -8  414.86   22.80 
  -2  -8   8  384.96   17.70 
   2  -8  -8  389.96   29.30 
  -2   8   7   30.20    6.00 
  -2   8   7   49.50    5.50 
   2   8  -7   43.30   10.30 
  -2   8   7   36.30   10.00 
  -2   8   7   47.30   11.70 
   2  -8  -7   54.09    9.90 
  -2  -8   7   29.00    7.90 
  -2  -8   7   35.40    5.80 
   2  -8  -7   26.20    7.90 
   2  -8  -7   29.80    9.70 
  -2  -8   7   43.50    5.60 
  -2   8   6  904.01   42.90 
   2   8  -6  829.32   35.20 
  -2   8   6  853.31   35.90 
  -2   8   6  835.02   35.90 
  -2   8   6  867.41   42.20 
  -2   8   6  800.92   29.60 
   2  -8  -6  826.92   35.60 
   2  -8  -6  820.22   41.40 
  -2  -8   6  872.51   30.40 
   2  -8  -6  878.41   39.70 
   2  -8  -6  823.82   36.00 
  -2  -8   6  848.02   29.60 
  -2   8   5   53.09    9.50 
   2   8  -5   43.30    9.20 
  -2   8   5   45.40    9.00 
  -2   8   5   36.30    8.80 
  -2   8   5   29.60    9.60 
  -2   8   5   40.70    9.20 
  -2   8   5   52.69    4.50 
   2  -8  -5   52.89    9.20 
  -2  -8   5   51.99    4.60 
   2  -8  -5   34.90    8.40 
  -2  -8   5   48.20    8.80 
   2  -8  -5   44.80    9.70 
  -2  -8   5   36.40   10.00 
  -2  -8   5   41.10    3.00 
   2  -8  -5   31.60    8.20 
  -2   8   4 2862.11  103.39 
   2   8  -4 2850.51   97.69 
  -2   8   4 2852.41   96.79 
  -2   8   4 2771.52   92.59 
  -2   8   4 2820.52   98.29 
  -2   8   4 2808.42   98.39 
  -2   8   4 2945.81   98.49 
   2   8  -4 2863.71  100.79 
  -2   8   4 2802.32  100.49 
  -2  -8   4 2798.62  100.09 
   2  -8  -4 2725.53   98.59 
   2  -8  -4 3009.90  103.09 
  -2  -8   4 2781.62   92.59 
   2  -8  -4 2963.70  102.59 
  -2  -8   4 2876.31   97.59 
   2  -8  -4 2850.31   98.39 
  -2   8   3  719.83   34.30 
  -2   8   3  755.82   32.80 
  -2   8   3  698.93   27.70 
  -2   8   3  683.33   31.30 
   2   8  -3  663.83   31.50 
   2   8  -3  723.03   28.70 
  -2   8   3  737.53   29.60 
   2  -8  -3  700.63   29.40 
   2  -8  -3  720.93   30.30 
  -2  -8   3  726.23   31.40 
  -2  -8   3  738.93   28.60 
  -2  -8   3  707.73   24.00 
   2  -8  -3  713.53   32.10 
   2  -8  -3  700.73   33.20 
   2   8  -2  628.74   30.40 
  -2   8   2  690.93   32.70 
  -2   8   2  691.93   30.20 
   2   8  -2  649.54   26.80 
  -2   8   2  694.43   27.80 
  -2   8   2  747.03   28.50 
  -2   8   2  718.93   27.60 
  -2   8   2  770.12   31.00 
  -2   8   2  598.44   26.80 
  -2  -8   2  695.43   26.90 
   2  -8  -2  681.63   27.80 
   2  -8  -2  680.53   28.40 
   2  -8  -2  639.04   29.30 
   2  -8  -2  722.53   28.20 
  -2  -8   2  686.73   30.60 
   2  -8  -2  673.63   26.20 
   2  -8  -2  721.33   32.50 
  -2  -8   2  704.23   30.30 
   2   8  -1   13.30    7.00 
  -2   8   1   14.60    5.20 
  -2   8   1    7.70    3.60 
  -2   8   1   12.20    4.30 
   2   8  -1   19.90    5.80 
  -2   8   1   14.70    5.60 
  -2   8   1   13.80    5.70 
  -2   8   1    5.30    7.60 
   2  -8  -1   14.70    5.80 
  -2  -8   1    7.20    4.70 
  -2  -8   1    6.00    7.40 
   2  -8  -1    9.10    3.30 
  -2  -8   1    8.80    2.90 
   2  -8  -1   12.00    6.10 
  -2  -8   1   14.10    3.30 
  -2  -8   1   15.20    3.70 
   2  -8  -1   10.50    5.70 
  -2  -8   1   15.50    5.40 
   2  -8  -1    6.80    6.20 
   2  -8  -1    6.00    6.00 
   2  -8  -1   16.50    4.40 
   2   8   0  601.14   28.20 
  -2   8   0  600.24   26.60 
  -2   8   0  602.34   23.90 
   2   8   0  587.94   20.10 
   2   8   0  657.53   28.30 
  -2   8   0  579.74   23.90 
  -2   8   0  606.84   22.90 
   2   8   0  587.24   20.10 
  -2   8   0  602.84   23.70 
  -2   8   0  593.84   23.30 
  -2  -8   0  569.14   22.70 
  -2  -8   0  604.54   28.80 
   2  -8   0  620.94   29.30 
   2  -8   0  637.44   24.60 
   2  -8   0  605.34   23.60 
  -2  -8   0  587.14   27.20 
   2  -8   0  648.14   26.50 
  -2  -8   0  593.94   22.50 
  -2  -8   0  587.74   24.70 
  -2  -8   0  564.74   22.70 
   2  -8   0  607.54   24.90 
  -2   8  -1   27.00    5.50 
  -2   8  -1   14.30    8.60 
   2   8   1   26.00    9.10 
  -2   8  -1   27.70    5.90 
   2   8   1   20.60    5.70 
   2   8   1   32.30    5.30 
   2   8   1   38.60    5.10 
  -2   8  -1   29.30    5.50 
   2   8   1   26.00    4.80 
  -2  -8  -1   31.90    5.90 
  -2  -8  -1   30.20    7.50 
  -2  -8  -1   31.40    4.60 
   2  -8   1   24.40    5.80 
   2  -8   1    2.50    5.50 
  -2  -8  -1   16.50    4.60 
  -2  -8  -1   20.90    6.10 
   2  -8   1   15.80    2.80 
  -2  -8  -1   20.70    3.40 
   2  -8   1   15.00    5.00 
   2  -8   1   23.50    6.00 
  -2  -8  -1   32.00    5.80 
  -2   8  -2  322.57   14.40 
   2   8   2  351.46   15.50 
   2   8   2  323.37   15.90 
  -2   8  -2  320.07   19.40 
   2   8   2  365.66   20.50 
  -2   8  -2  329.67   15.80 
   2   8   2  325.87   14.10 
  -2  -8  -2  306.27   16.10 
   2  -8   2  326.07   15.20 
   2  -8   2  329.17   13.10 
  -2  -8  -2  349.57   22.00 
  -2  -8  -2  303.17   16.20 
  -2  -8  -2  306.97   14.40 
   2  -8   2  331.37   20.70 
  -2  -8  -2  320.87   16.90 
   2  -8   2  330.87   15.40 
   2   8   3  100.69   11.60 
   2   8   3   88.59    8.00 
   2   8   3   96.49   12.40 
   2   8   3   95.69    9.60 
   2   8   3  101.89    9.60 
  -2   8  -3  101.49   13.10 
  -2   8  -3   87.89    7.50 
  -2   8  -3  107.49   10.30 
   2  -8   3  100.29    9.20 
  -2  -8  -3   92.89    9.70 
  -2  -8  -3   91.99   10.40 
   2  -8   3  100.09    8.50 
   2  -8   3  109.09   12.80 
  -2  -8  -3  106.59   10.80 
  -2  -8  -3   67.29   10.40 
  -2   8  -4  430.16   20.20 
   2   8   4  411.56   25.00 
   2   8   4  429.66   22.30 
   2   8   4  334.17   18.90 
   2   8   4  402.06   20.10 
  -2   8  -4  421.46   16.80 
   2  -8   4  416.06   26.60 
   2  -8   4  444.86   18.60 
  -2  -8  -4  406.46   20.20 
   2  -8   4  422.26   18.80 
  -2  -8  -4  382.56   20.90 
   2  -8   4  416.16   18.70 
  -2  -8  -4  419.76   20.70 
  -2  -8  -4  394.66   27.20 
   2  -8   4  409.76   22.60 
  -2   8  -5  276.87   16.70 
   2   8   5  249.48   22.40 
   2   8   5  234.58   16.70 
   2   8   5  259.87   15.90 
   2   8   5  257.17   16.50 
  -2   8  -5  256.17   12.30 
   2   8   5  267.97   18.80 
  -2  -8  -5  253.17   16.60 
  -2  -8  -5  243.08   16.10 
  -2  -8  -5  271.27   24.50 
   2  -8   5  256.87   18.30 
   2  -8   5  265.47   15.80 
   2  -8   5  263.57   14.10 
   2  -8   5  258.37   14.30 
  -2  -8  -5  277.07   17.10 
   2   8   6  467.65   24.90 
   2   8   6  494.65   26.50 
  -2   8  -6  446.66   22.70 
  -2   8  -6  487.15   19.40 
   2   8   6  447.16   23.90 
   2   8   6  487.85   23.80 
   2  -8   6  479.85   21.70 
  -2  -8  -6  449.06   18.70 
  -2  -8  -6  474.05   24.30 
  -2  -8  -6  454.05   32.40 
  -2  -8  -6  468.75   23.90 
  -2  -8  -6  502.25   24.80 
   2  -8   6  508.05   21.50 
   2  -8   6  499.45   24.70 
  -2   8  -7  161.08   14.90 
   2   8   7  184.58   16.70 
   2   8   7  219.58   16.40 
  -2   8  -7  151.18   10.10 
   2   8   7  197.98   19.20 
   2  -8   7  165.88   12.50 
  -2  -8  -7  165.68   14.00 
   2  -8   7  169.28   16.10 
   2  -8   7  163.88   12.90 
  -2  -8  -7  181.78   15.70 
  -2  -8  -7  197.58   24.30 
  -2  -8  -7  173.38   10.20 
  -2  -8  -7  181.68   15.40 
   2   8   8  379.26   23.10 
  -2   8  -8  388.46   22.60 
   2   8   8  396.26   26.50 
  -2   8  -8  395.06   17.50 
   2  -8   8  395.86   25.20 
  -2  -8  -8  396.46   23.10 
  -2  -8  -8  404.36   23.90 
  -2  -8  -8  378.66   32.00 
  -2  -8  -8  382.26   23.60 
   2  -8   8  405.36   20.50 
  -2  -8  -8  374.86   17.50 
   2  -8   8  403.66   20.30 
   2   8   9    9.30    9.10 
  -2   8  -9    4.80    5.20 
   2   8   9   11.60    5.90 
   2   8   9   20.70   10.40 
  -2   8  -9   10.90    7.60 
  -2  -8  -9    9.90    8.70 
  -2  -8  -9   13.50    9.70 
  -2  -8  -9   18.40    9.20 
  -2  -8  -9    8.30    6.40 
  -2  -8  -9   19.50    6.30 
   2  -8   9    9.70    7.90 
   2  -8   9   11.60    7.00 
  -2   8 -10  141.69   11.00 
   2   8  10  101.79   14.20 
  -2   8 -10  144.89   17.30 
   2   8  10  122.19   16.40 
   2   8  10  178.68   20.70 
  -2  -8 -10  142.69   11.30 
  -2  -8 -10   90.09   17.10 
  -2  -8 -10  181.78   18.40 
   2  -8  10  170.38   15.30 
  -2  -8 -10  147.69   17.40 
   2   8  11   14.80   10.60 
  -2   8 -11   21.50   11.80 
   2   8  11   31.50   12.40 
  -2   8 -11   20.50    6.40 
  -2  -8 -11   22.40    7.90 
   2  -8  11   51.49   11.30 
  -2  -8 -11   11.80   12.30 
  -2  -8 -11   42.40   12.40 
   2  -8  11   27.00   11.00 
  -2   8 -12  532.75   23.60 
   2   8  12  530.05   32.00 
   2   8  12  512.85   37.20 
  -2   8 -12  484.55   28.70 
  -2  -8 -12  536.15   43.40 
  -2  -8 -12  534.25   32.10 
   2  -8  12  499.45   28.90 
  -2  -8 -12  539.55   25.70 
   2  -8  12  579.04   39.90 
  -2   8 -13   77.79   15.70 
   2   8  13   55.39   15.40 
   2   8  13   95.99   17.50 
  -2  -8 -13   88.69   12.20 
   2  -8  13   57.59   15.00 
  -2  -8 -13   96.39   16.80 
   2  -8  13   60.09   13.60 
  -2  -8 -13   57.09   17.30 
  -2   8 -14   99.49   17.80 
   2   8  14   89.19   17.60 
   2   8  14  129.39   19.90 
  -2  -8 -14  138.29   15.00 
   2  -8  14  120.09   16.90 
  -2  -8 -14  103.09   18.10 
  -2  -8 -14   87.69   19.80 
   2  -8  14  111.09   18.20 
   2   8  15   -6.00   13.70 
  -2   8 -15    8.20   13.40 
   2   8  15    3.30   13.20 
   2  -8  15   14.70   12.70 
  -2  -8 -15   22.40   15.50 
  -2  -8 -15   20.90   14.90 
  -2  -8 -15   16.90    9.80 
   2  -8  15   21.60   13.70 
   2   8  16   25.60   15.70 
   2   8  16  -21.70   14.10 
  -2   8 -16   12.40   13.70 
  -2  -8 -16   14.70   13.80 
  -2  -8 -16   -2.20   13.50 
   2  -8  16    8.00   11.60 
  -2  -8 -16    9.20   10.40 
   2  -8  16    1.10   13.20 
   2   8  17  -20.60   13.70 
   2   8  17   13.00   15.90 
  -2   8 -17    4.70   13.80 
   2  -8  17   10.90   14.70 
   2  -8  17  -10.80   12.90 
  -2  -8 -17  -15.40   13.60 
  -2  -8 -17   26.10   16.40 
  -2   8 -18   30.70   16.30 
   2   8  18  -35.40   16.30 
  -2  -8 -18    7.50   14.80 
   2  -8  18   10.30   14.80 
   2  -8  18    4.10   15.40 
   2   8  19  -32.60   15.70 
  -2   8 -19    7.90   14.20 
   2  -8  19    0.50   14.60 
   2  -8  19    7.60   16.80 
  -2  10  19  -10.20   21.70 
   2  10 -19   91.69   21.30 
  -2 -10  19   55.49   18.20 
  -2 -10  19   40.90   23.80 
   2  10 -18    3.20   14.60 
  -2  10  18  -40.00   17.20 
  -2 -10  18   -0.30   16.10 
  -2 -10  18   14.70   12.50 
  -2  10  17    6.80   18.80 
   2  10 -17   97.59   19.60 
  -2  10  17   33.20   17.10 
  -2 -10  17   64.19   14.60 
  -2 -10  17   46.40   18.00 
  -2  10  16    1.70   14.50 
   2  10 -16   38.40   15.50 
  -2  10  16   -0.20   16.60 
  -2 -10  16   26.10   11.90 
  -2 -10  16   10.60   14.80 
  -2  10  15   58.59   16.70 
   2  10 -15   70.49   17.30 
  -2  10  15   27.30   18.20 
  -2 -10  15   59.29   17.10 
  -2 -10  15   72.49   13.40 
  -2  10  14   55.99   16.40 
  -2  10  14   27.50   16.70 
   2  10 -14   82.69   16.80 
  -2 -10  14   56.89   11.80 
  -2 -10  14   39.40   15.80 
   2  10 -13   83.39   16.60 
  -2  10  13   51.59   17.00 
  -2  10  13  120.09   18.90 
  -2 -10  13   94.39   12.80 
  -2 -10  13   44.90   15.30 
   2 -10 -13   81.09   16.10 
   2  10 -12  354.76   25.80 
  -2  10  12  356.16   27.10 
  -2  10  12  402.36   36.20 
  -2 -10  12  370.96   34.10 
  -2 -10  12  373.16   21.40 
   2 -10 -12  330.57   26.00 
  -2  10  11  137.99   19.90 
   2  10 -11  194.98   20.50 
  -2  10  11  149.88   19.20 
  -2 -10  11  150.88   19.50 
   2 -10 -11  113.79   18.60 
   2 -10 -11  212.08   20.90 
  -2 -10  11  183.38   14.00 
   2  10 -10  107.29   15.50 
  -2  10  10   87.59   14.90 
  -2  10  10   64.99   14.90 
  -2 -10  10   95.49   10.30 
   2 -10 -10   59.69   14.00 
   2 -10 -10   81.09   14.80 
  -2 -10  10   77.69   14.50 
  -2 -10  10  104.49   10.60 
  -2  10   9  438.66   26.40 
  -2  10   9  434.06   26.30 
   2  10  -9  414.66   25.10 
  -2  10   9  450.25   32.80 
   2 -10  -9  425.86   26.10 
  -2 -10   9  459.85   20.40 
  -2 -10   9  447.96   32.30 
   2 -10  -9  426.26   25.40 
   2 -10  -9  468.25   33.90 
  -2 -10   9  420.36   19.70 
  -2  10   8   63.19   12.00 
   2  10  -8   82.89   12.90 
  -2  10   8   37.10    6.50 
  -2  10   8   43.10   11.90 
  -2 -10   8   34.20   10.50 
   2 -10  -8   32.70   10.50 
   2 -10  -8   53.59   11.70 
  -2 -10   8   57.59    7.20 
  -2 -10   8   56.59    6.60 
   2 -10  -8   42.20   10.40 
  -2  10   7  372.56   22.40 
  -2  10   7  366.76   28.40 
  -2  10   7  369.96   22.10 
   2  10  -7  369.96   21.50 
  -2  10   7  357.36   20.70 
  -2 -10   7  371.26   16.00 
   2 -10  -7  396.96   22.40 
   2 -10  -7  324.67   21.70 
   2 -10  -7  378.06   28.20 
  -2 -10   7  362.66   15.20 
  -2  10   6   34.80    9.00 
  -2  10   6   16.30    4.30 
  -2  10   6   18.00   10.00 
  -2  10   6   15.30    9.60 
  -2  10   6   31.90    9.50 
   2  10  -6   20.10    8.60 
   2 -10  -6   17.90    9.00 
   2 -10  -6    8.60    7.50 
   2 -10  -6   19.80    8.50 
  -2 -10   6   31.10    3.80 
  -2 -10   6   23.90    4.30 
  -2  10   5   93.89   11.60 
  -2  10   5  106.09   12.70 
  -2  10   5  108.49   10.10 
   2  10  -5  114.69   12.60 
  -2  10   5  126.39   12.90 
  -2  10   5   82.59   12.70 
  -2  10   5  122.99   15.50 
  -2  10   5   70.69   11.00 
   2 -10  -5  131.99   13.70 
   2 -10  -5  123.29   12.80 
  -2 -10   5  109.69    6.30 
   2 -10  -5   81.79   11.90 
  -2 -10   5  110.59    4.80 
   2 -10  -5   80.39   11.50 
  -2  10   4   85.59   10.70 
  -2  10   4   76.59   10.60 
  -2  10   4   54.39   10.80 
   2  10  -4  117.79   14.20 
  -2  10   4   86.09   13.30 
  -2  10   4   98.89   10.80 
  -2  10   4   91.29    8.80 
   2  10  -4  112.79   12.10 
   2 -10  -4   77.99   11.10 
  -2 -10   4   90.49    5.50 
   2 -10  -4   61.19    9.80 
   2 -10  -4   73.09   10.30 
   2 -10  -4   59.59   10.40 
  -2 -10   4  104.99   10.70 
   2  10  -3  903.81   45.00 
  -2  10   3 1093.09   42.60 
  -2  10   3 1170.98   40.40 
  -2  10   3 1071.49   36.70 
  -2  10   3 1171.28   47.20 
  -2  10   3 1144.29   49.00 
  -2  10   3 1062.99   45.10 
  -2  10   3 1114.69   42.50 
   2  10  -3 1110.69   42.10 
  -2 -10   3 1092.39   45.70 
  -2 -10   3 1188.38   46.70 
   2 -10  -3 1164.68   46.80 
   2 -10  -3 1165.58   48.70 
   2 -10  -3 1057.49   42.80 
  -2 -10   3 1137.69   36.60 
  -2 -10   3 1141.69   41.90 
   2 -10  -3 1126.69   43.70 
  -2 -10   3 1128.49   37.90 
  -2 -10   3 1100.89   36.60 
   2  10  -2  128.19   10.90 
  -2  10   2  113.69   13.20 
  -2  10   2  139.19   11.30 
  -2  10   2  164.28    7.40 
  -2  10   2  122.99    9.80 
  -2  10   2  137.29   15.00 
   2  10  -2  151.28   15.70 
  -2  10   2  124.19   10.10 
  -2  10   2  167.08   15.10 
   2 -10  -2  157.68   14.50 
  -2 -10   2  159.08   10.60 
   2 -10  -2  152.78    9.30 
  -2 -10   2  147.19    7.20 
  -2 -10   2  138.09    8.20 
   2 -10  -2  142.19   12.40 
   2 -10  -2  146.09   11.90 
  -2 -10   2  149.19    7.90 
   2 -10  -2  140.19   16.80 
   2 -10  -2  160.08   14.40 
   2 -10  -2  127.69   11.20 
  -2 -10   2  153.98   14.00 
  -2 -10   2  154.98   14.30 
  -2 -10   2  135.19    7.10 
  -2  10   1  536.65   24.80 
   2  10  -1  474.95   27.10 
   2  10  -1  559.04   22.60 
  -2  10   1  529.55   23.10 
  -2  10   1  498.55   27.00 
  -2  10   1  563.04   23.30 
  -2  10   1  565.34   23.90 
  -2  10   1  550.94   20.80 
   2 -10  -1  575.04   23.40 
   2 -10  -1  548.35   25.20 
  -2 -10   1  537.55   20.70 
   2 -10  -1  560.94   27.10 
  -2 -10   1  549.25   20.90 
   2 -10  -1  543.45   23.80 
  -2 -10   1  581.24   28.40 
  -2 -10   1  605.64   28.00 
   2 -10  -1  583.44   24.50 
   2 -10  -1  541.65   29.00 
  -2 -10   1  539.05   21.10 
  -2 -10   1  573.64   22.60 
   2 -10  -1  547.25   24.30 
  -2  10   0  223.88   11.60 
  -2  10   0  208.08   12.50 
   2  10   0  223.28   17.70 
  -2  10   0  212.18   17.00 
  -2  10   0  213.98   12.60 
  -2  10   0  216.58   12.30 
  -2  10   0  231.88   13.20 
   2 -10   0  220.18   13.00 
   2 -10   0  256.47   15.70 
   2 -10   0  212.18   16.10 
   2 -10   0  213.28   18.20 
  -2 -10   0  234.38   13.60 
   2 -10   0  208.98   13.30 
  -2 -10   0  219.78   11.70 
  -2 -10   0  220.18   16.70 
  -2 -10   0  221.08   11.60 
  -2 -10   0  220.08   17.10 
  -2 -10   0  209.08   11.70 
   2 -10   0  224.78   13.70 
   2  10   1   84.59    7.90 
  -2  10  -1   81.59    8.10 
   2  10   1   89.49   13.30 
   2  10   1   82.39    7.20 
  -2  10  -1   84.99    8.40 
  -2  10  -1   75.99    7.60 
  -2  10  -1   97.19   13.50 
   2  10   1   78.29    6.80 
  -2  10  -1   78.59    7.80 
   2 -10   1   79.39    8.70 
  -2 -10  -1   58.99    8.90 
  -2 -10  -1   88.09    8.80 
  -2 -10  -1   78.69    8.30 
   2 -10   1   95.59   12.20 
  -2 -10  -1  102.79   13.00 
   2 -10   1   76.39    8.70 
  -2 -10  -1   60.69    7.90 
  -2 -10  -1  100.59    8.40 
  -2 -10  -1   92.29    6.90 
   2 -10   1   81.39    8.30 
  -2  10  -2  100.29    7.90 
  -2  10  -2  102.69    7.50 
   2  10   2   94.79    8.90 
  -2  10  -2  113.49   10.50 
   2  10   2   96.59    8.80 
  -2  10  -2  102.79   14.00 
   2  10   2  116.69   14.00 
   2  10   2  112.59   13.60 
   2  10   2  105.69    9.60 
   2 -10   2   90.29    9.30 
  -2 -10  -2  103.49    9.50 
  -2 -10  -2   99.29    6.60 
  -2 -10  -2   99.79   12.10 
   2 -10   2  112.99    7.70 
  -2 -10  -2   97.99    7.10 
   2 -10   2  100.19   11.00 
   2 -10   2  103.99    9.40 
  -2 -10  -2   72.59   10.40 
  -2 -10  -2   92.79   10.00 
  -2  10  -3   93.39   13.50 
   2  10   3   84.79    9.40 
   2  10   3   63.69    9.90 
  -2  10  -3   71.39    6.80 
   2  10   3   87.79    9.80 
   2  10   3   73.89   13.10 
  -2  10  -3   91.39   10.50 
  -2  10  -3   75.59    8.10 
   2  10   3   78.49    8.40 
   2 -10   3   80.49    7.20 
   2 -10   3   73.49   11.10 
   2 -10   3   79.79    8.80 
   2 -10   3   81.79    8.30 
  -2 -10  -3   84.29    9.60 
  -2 -10  -3   87.39   10.70 
  -2 -10  -3   83.79    5.30 
  -2 -10  -3   62.79   10.70 
   2 -10   3   46.70    8.00 
  -2 -10  -3   61.99    8.10 
   2  10   4  260.27   16.90 
   2  10   4  310.47   21.80 
   2  10   4  268.97   19.20 
  -2  10  -4  280.67   16.40 
   2  10   4  250.87   22.20 
   2  10   4  277.87   12.70 
  -2  10  -4  261.77   11.80 
   2 -10   4  281.97   14.90 
   2 -10   4  289.47   23.80 
   2 -10   4  258.37   14.10 
  -2 -10  -4  287.37   17.10 
  -2 -10  -4  259.67   17.60 
  -2 -10  -4  250.37   16.90 
  -2 -10  -4  288.67   24.40 
   2  10   5  617.14   30.40 
  -2  10  -5  592.74   21.80 
  -2  10  -5  565.44   27.20 
   2  10   5  605.14   27.70 
   2  10   5  570.14   25.40 
   2  10   5  613.34   27.60 
   2 -10   5  572.14   25.30 
  -2 -10  -5  610.04   28.50 
  -2 -10  -5  601.64   27.90 
   2 -10   5  652.53   35.80 
  -2 -10  -5  622.74   28.50 
  -2 -10  -5  629.04   36.80 
   2 -10   5  616.84   26.40 
   2 -10   5  609.74   25.10 
   2  10   6  336.47   22.70 
  -2  10  -6  316.67   12.70 
  -2  10  -6  344.57   19.70 
   2  10   6  280.87   19.00 
   2  10   6  303.57   18.90 
   2 -10   6  327.47   16.90 
  -2 -10  -6  317.97   19.60 
  -2 -10  -6  301.77   19.90 
   2 -10   6  328.67   19.20 
  -2 -10  -6  320.77   13.00 
  -2 -10  -6  321.47   28.60 
  -2 -10  -6  303.57   19.60 
   2 -10   6  321.77   16.80 
   2  10   7  562.44   28.80 
  -2  10  -7  567.54   28.40 
   2  10   7  595.84   29.30 
  -2  10  -7  550.94   20.90 
   2  10   7  622.54   32.70 
   2 -10   7  620.54   29.40 
  -2 -10  -7  603.54   29.70 
  -2 -10  -7  569.44   21.80 
  -2 -10  -7  605.94   39.10 
   2 -10   7  566.24   25.30 
   2 -10   7  562.14   25.50 
  -2 -10  -7  577.74   28.90 
  -2 -10  -7  580.84   29.50 
   2  10   8   29.30    6.70 
   2  10   8   34.20   10.10 
  -2  10  -8   42.70   11.60 
   2  10   8   48.00   11.20 
  -2 -10  -8   66.69   11.60 
   2 -10   8   34.50    7.60 
  -2 -10  -8   46.00   13.00 
  -2 -10  -8   37.80   11.20 
   2 -10   8   74.49    9.80 
  -2 -10  -8   32.30    7.70 
  -2 -10  -8   54.69    6.10 
  -2  10  -9  338.27   13.90 
   2  10   9  358.46   23.80 
   2  10   9  286.87   22.80 
  -2  10  -9  347.17   22.90 
   2  10   9  347.07   28.00 
  -2 -10  -9  337.47   23.70 
  -2 -10  -9  378.76   31.30 
   2 -10   9  373.06   25.30 
  -2 -10  -9  367.26   23.40 
  -2 -10  -9  367.56   16.30 
   2 -10   9  362.36   20.30 
   2  10  10   34.70   12.20 
   2  10  10   10.00   10.90 
  -2  10 -10   12.40   10.60 
   2  10  10   24.70    7.40 
  -2 -10 -10   24.00   12.60 
  -2 -10 -10   30.70   11.40 
  -2 -10 -10   26.70    6.50 
   2 -10  10   20.60    9.20 
  -2 -10 -10   30.20   12.40 
   2  10  11  201.28   21.40 
  -2  10 -11  188.18   17.20 
   2  10  11  131.99   18.20 
   2 -10  11  197.38   17.20 
  -2 -10 -11  208.28   13.50 
  -2 -10 -11  142.39   21.40 
  -2 -10 -11  181.38   20.80 
   2  10  12   43.70   13.60 
  -2  10 -12   60.09   14.90 
   2  10  12   84.39   16.70 
  -2 -10 -12   80.19    9.80 
   2 -10  12   49.60   12.00 
  -2 -10 -12   55.49   16.30 
  -2 -10 -12   73.39   16.00 
   2 -10  12   36.50   13.70 
   2  10  13   87.09   17.20 
   2  10  13   44.90   15.80 
  -2  10 -13   78.89   16.60 
  -2 -10 -13   90.89   17.20 
  -2 -10 -13  100.99   11.60 
  -2 -10 -13   52.39   17.50 
   2 -10  13   87.09   14.20 
   2 -10  13   62.69   16.20 
   2  10  14    4.80   13.30 
   2  10  14    6.90   13.50 
  -2  10 -14   27.40   14.10 
   2 -10  14   14.20   10.30 
  -2 -10 -14   17.90    8.60 
  -2 -10 -14   22.40   13.50 
  -2 -10 -14    5.50   14.30 
   2 -10  14   21.70   13.10 
  -2  10 -15   35.20   15.10 
   2  10  15   41.00   15.80 
   2  10  15    8.30   15.30 
  -2 -10 -15   20.40   14.60 
  -2 -10 -15   33.40   16.20 
  -2 -10 -15   25.30   13.60 
   2 -10  15   24.60   12.30 
   2 -10  15   27.20   14.60 
  -2  10 -16    3.10   13.60 
   2  10  16  -37.20   14.00 
  -2 -10 -16   13.20   15.00 
  -2 -10 -16   -5.60   12.60 
   2 -10  16    3.50   13.80 
   2 -10  16  -10.80   11.70 
   2  10  17  -29.30   15.90 
  -2  10 -17   20.40   14.30 
  -2 -10 -17   22.60   15.60 
   2 -10  17   -8.00   12.00 
   2 -10  17   15.20   15.90 
  -2 -10 -17    9.90   16.00 
  -2  10 -18   24.20   16.20 
   2  10  18  -40.10   14.70 
   2 -10  18    0.30   15.60 
   2 -10  18    9.10   14.10 
  -2  10 -19   16.40   17.50 
   2 -10  19   26.00   16.60 
  -2  12  18  -19.10   19.20 
   2  12 -18   36.80   16.10 
  -2 -12  18   17.50   12.30 
  -2 -12  18   32.20   19.00 
   2  12 -17   12.70   15.60 
  -2  12  17  -20.80   18.00 
  -2 -12  17   14.40   11.60 
  -2 -12  17   -1.10   15.30 
   2  12 -16   67.59   17.70 
  -2  12  16   10.20   18.70 
  -2 -12  16   24.30   11.30 
  -2 -12  16   40.80   17.90 
  -2  12  15   39.20   15.90 
  -2  12  15   18.00    9.20 
   2  12 -15   56.99   16.40 
  -2  12  15   19.00   17.50 
  -2 -12  15   41.00   16.40 
  -2 -12  15   58.79   12.20 
  -2  12  14   12.90    8.00 
  -2  12  14   -5.50   14.90 
  -2  12  14   18.30   13.80 
   2  12 -14    1.80   13.10 
  -2 -12  14   11.50    9.20 
  -2 -12  14   -0.80   12.40 
  -2  12  13  203.98   23.10 
   2  12 -13  211.88   23.70 
  -2  12  13  123.19   23.20 
  -2  12  13  165.88   22.00 
  -2 -12  13  193.58   16.40 
   2 -12 -13  168.98   21.60 
  -2 -12  13  140.09   22.10 
  -2  12  12  148.99   19.80 
   2  12 -12  182.28   21.50 
  -2  12  12  105.79   20.80 
  -2  12  12  143.59   19.70 
  -2 -12  12  114.19   19.50 
   2 -12 -12  143.89   19.50 
  -2 -12  12  148.29   13.80 
   2 -12 -12   96.09   18.30 
  -2  12  11  372.76   35.50 
  -2  12  11  371.06   27.40 
  -2  12  11  373.76   27.00 
   2  12 -11  384.26   24.80 
  -2 -12  11  439.26   36.10 
   2 -12 -11  397.46   27.70 
  -2 -12  11  421.56   21.00 
   2 -12 -11  415.06   37.20 
  -2  12  10  131.69   19.50 
  -2  12  10  176.18   18.00 
  -2  12  10  174.08   19.50 
   2  12 -10  176.08   19.70 
  -2 -12  10  121.49   18.10 
   2 -12 -10  200.58   19.30 
  -2 -12  10  185.08   13.00 
   2 -12 -10  125.09   18.60 
  -2 -12  10  183.58   12.70 
   2 -12 -10  184.18   20.10 
  -2  12   9  310.57   30.00 
  -2  12   9  312.57   22.60 
   2  12  -9  303.87   21.70 
  -2  12   9  293.87   20.40 
  -2  12   9  280.47   22.20 
   2 -12  -9  343.37   30.50 
  -2 -12   9  318.37   28.70 
  -2 -12   9  275.37   14.80 
   2 -12  -9  271.97   22.20 
  -2 -12   9  294.17   15.70 
   2 -12  -9  256.17   21.10 
  -2  12   8   86.59   14.10 
   2  12  -8   88.09   14.00 
  -2  12   8   81.59   13.60 
  -2  12   8   52.49    7.00 
  -2  12   8   61.99   13.70 
   2 -12  -8   59.59   12.80 
  -2 -12   8   85.09    8.20 
  -2 -12   8   81.69    7.60 
   2 -12  -8   87.09   13.50 
   2 -12  -8   81.69   14.10 
  -2  12   7  322.87   21.00 
  -2  12   7  306.27   27.30 
  -2  12   7  294.37   24.10 
  -2  12   7  270.37   16.80 
   2  12  -7  267.37   19.10 
  -2  12   7  297.17   20.60 
   2 -12  -7  305.77   21.20 
  -2 -12   7  285.67   13.50 
   2 -12  -7  302.57   28.10 
  -2 -12   7  277.07   12.80 
   2 -12  -7  308.17   20.50 
  -2  12   6  100.49   16.40 
   2  12  -6   87.89   12.60 
  -2  12   6  114.29   13.60 
  -2  12   6   83.89    9.10 
  -2  12   6   94.59   12.80 
  -2  12   6   60.09   12.70 
   2 -12  -6   57.69   11.20 
  -2 -12   6   85.59    6.00 
  -2 -12   6   87.89    6.70 
   2 -12  -6   95.69   12.70 
   2 -12  -6  112.69   14.30 
  -2  12   5  222.58   16.60 
  -2  12   5  217.48   19.90 
  -2  12   5  237.68   24.60 
  -2  12   5  228.68   12.20 
   2  12  -5  218.58   15.80 
  -2  12   5  226.08   22.80 
   2  12  -5  222.48   19.90 
  -2  12   5  226.98   16.60 
  -2 -12   5  228.18    9.50 
   2 -12  -5  180.38   16.80 
   2 -12  -5  252.77   18.10 
   2 -12  -5  244.98   21.20 
  -2 -12   5  224.38   10.30 
  -2  12   4    0.70    9.60 
   2  12  -4    1.70    6.80 
  -2  12   4    0.90    8.80 
  -2  12   4    7.40    7.90 
   2  12  -4    1.40    9.80 
  -2  12   4    1.60    6.40 
  -2  12   4    3.60    1.80 
  -2  12   4    1.10    6.80 
  -2 -12   4    3.20    3.30 
   2 -12  -4    1.40    6.50 
   2 -12  -4    1.10    7.10 
  -2 -12   4    9.40    8.10 
  -2 -12   4    9.30    2.80 
  -2 -12   4    6.90    5.70 
   2 -12  -4    1.40    7.70 
  -2  12   3  305.17   18.00 
  -2  12   3  287.97   21.20 
  -2  12   3  303.17   10.60 
   2  12  -3  264.47   21.50 
  -2  12   3  297.97   16.80 
   2  12  -3  301.57   16.50 
  -2  12   3  287.87   23.20 
  -2 -12   3  281.57   16.00 
  -2 -12   3  295.37   12.20 
  -2 -12   3  307.37   20.70 
   2 -12  -3  291.87   18.50 
  -2 -12   3  293.67   12.30 
   2 -12  -3  283.47   20.30 
   2 -12  -3  323.47   18.20 
  -2 -12   3  296.07   13.00 
  -2  12   2  235.78   10.60 
   2  12  -2  293.97   21.20 
  -2  12   2  264.87   17.80 
   2  12  -2  239.98   14.50 
  -2  12   2  249.58   15.50 
  -2  12   2  222.38   19.00 
  -2 -12   2  245.98   14.00 
  -2 -12   2  261.07   19.50 
  -2 -12   2  270.27   11.80 
  -2 -12   2  259.77   12.00 
  -2 -12   2  240.68   12.10 
   2 -12  -2  247.88   16.40 
   2 -12  -2  236.48   12.00 
   2 -12  -2  246.58   16.20 
  -2 -12   2  249.08   12.40 
   2 -12  -2  259.07   18.60 
  -2  12   1  552.24   26.00 
   2  12  -1  578.64   23.60 
  -2  12   1  533.55   21.30 
  -2  12   1  515.35   23.50 
   2  12  -1  591.74   30.30 
  -2  12   1  523.85   29.00 
  -2  12   1  548.55   24.20 
  -2 -12   1  554.14   23.30 
   2 -12  -1  615.64   24.30 
  -2 -12   1  569.14   29.20 
  -2 -12   1  542.95   21.90 
  -2 -12   1  544.65   22.40 
  -2 -12   1  572.74   23.00 
   2 -12  -1  561.54   25.40 
  -2 -12   1  554.34   22.30 
   2 -12  -1  572.84   27.00 
   2 -12  -1  571.04   25.40 
  -2 -12   1  565.14   26.50 
   2 -12  -1  551.54   25.90 
   2  12   0  414.96   23.60 
  -2  12   0  415.66   17.90 
  -2  12   0  398.76   24.60 
  -2  12   0  405.76   18.70 
  -2  12   0  423.06   18.90 
   2  12   0  410.36   25.20 
  -2  12   0  424.06   19.60 
   2 -12   0  412.06   20.30 
  -2 -12   0  432.56   19.00 
   2 -12   0  375.56   20.00 
  -2 -12   0  404.56   17.90 
   2 -12   0  371.56   21.10 
  -2 -12   0  436.56   20.10 
  -2 -12   0  452.35   25.40 
  -2 -12   0  419.46   18.60 
   2 -12   0  421.76   21.00 
   2  12   1  710.83   35.50 
  -2  12  -1  744.03   28.40 
  -2  12  -1  776.52   36.10 
   2  12   1  721.53   27.20 
  -2  12  -1  726.03   29.20 
  -2  12  -1  745.93   28.40 
   2  12   1  706.53   35.50 
   2  12   1  725.03   27.30 
  -2 -12  -1  772.72   28.70 
  -2 -12  -1  725.03   29.80 
   2 -12   1  729.43   30.70 
   2 -12   1  778.12   30.00 
  -2 -12  -1  720.23   29.90 
   2 -12   1  864.61   35.20 
   2 -12   1  748.93   30.40 
  -2 -12  -1  724.53   36.50 
  -2 -12  -1  733.13   33.70 
  -2 -12  -1  744.93   27.60 
  -2  12  -2  163.78    9.70 
  -2  12  -2  159.78    9.90 
   2  12   2  186.78   18.60 
  -2  12  -2  169.08   11.70 
   2  12   2  178.88   18.10 
   2  12   2  167.78   11.20 
  -2  12  -2  170.88   17.60 
   2  12   2  171.28   12.40 
   2  12   2  183.48   11.40 
   2 -12   2  159.78   11.90 
   2 -12   2  164.48   12.70 
  -2 -12  -2  218.28   20.00 
  -2 -12  -2  185.98   13.30 
   2 -12   2  163.58   16.70 
  -2 -12  -2  191.58    7.90 
   2 -12   2  171.38   11.20 
  -2 -12  -2  171.78    9.00 
  -2 -12  -2  177.68   13.30 
  -2 -12  -2  166.08   15.70 
  -2  12  -3  428.06   16.80 
  -2  12  -3  418.26   25.90 
  -2  12  -3  438.36   21.30 
   2  12   3  444.86   27.20 
   2  12   3  447.26   27.70 
   2  12   3  428.36   21.10 
  -2  12  -3  444.46   17.10 
   2  12   3  428.66   20.50 
   2  12   3  411.86   19.90 
  -2 -12  -3  397.96   22.10 
   2 -12   3  454.55   19.20 
  -2 -12  -3  443.26   24.70 
  -2 -12  -3  421.26   21.80 
   2 -12   3  442.36   20.00 
   2 -12   3  429.86   20.60 
  -2 -12  -3  452.85   29.70 
  -2 -12  -3  421.16   16.10 
   2 -12   3  462.95   27.50 
   2  12   4  286.97   22.40 
   2  12   4  250.87   15.40 
  -2  12  -4  223.48    9.50 
  -2  12  -4  226.58    9.70 
  -2  12  -4  256.97   20.60 
   2  12   4  306.27   16.80 
  -2  12  -4  270.87   16.30 
   2  12   4  239.28   15.80 
  -2 -12  -4  250.97   17.00 
  -2 -12  -4  248.98    9.40 
  -2 -12  -4  242.78   18.50 
   2 -12   4  237.28   13.60 
   2 -12   4  248.18   14.10 
   2 -12   4  245.78   14.70 
  -2 -12  -4  289.27   25.20 
   2 -12   4  250.27   21.40 
  -2 -12  -4  238.58   16.10 
   2  12   5  336.27   20.10 
   2  12   5  302.97   12.30 
   2  12   5  322.07   18.30 
  -2  12  -5  320.47   19.00 
   2  12   5  319.07   22.30 
   2  12   5  316.37   22.70 
  -2 -12  -5  326.37   20.30 
   2 -12   5  335.97   16.70 
  -2 -12  -5  312.17   19.40 
  -2 -12  -5  314.57   11.00 
   2 -12   5  334.27   17.60 
  -2 -12  -5  306.47   11.00 
  -2 -12  -5  334.57   28.30 
  -2 -12  -5  311.97   21.40 
   2  12   6  256.47   14.10 
   2  12   6  276.17   23.80 
   2  12   6  231.08   20.80 
   2  12   6  242.28   17.70 
  -2  12  -6  220.38   17.30 
   2 -12   6  239.98   14.50 
   2 -12   6  235.78   14.90 
  -2 -12  -6  264.97   19.10 
  -2 -12  -6  301.97   28.40 
  -2 -12  -6  248.28   18.90 
  -2 -12  -6  246.58   17.90 
   2 -12   6  247.58   16.30 
  -2 -12  -6  251.87    9.10 
   2  12   7  287.17   20.00 
   2  12   7  296.37   24.50 
   2  12   7  283.97   18.30 
  -2  12  -7  290.67   19.90 
  -2 -12  -7  302.37   30.30 
   2 -12   7  306.97   17.00 
   2 -12   7  295.87   19.20 
  -2 -12  -7  297.47   20.20 
   2 -12   7  295.67   16.80 
  -2 -12  -7  296.57   20.90 
  -2 -12  -7  327.27   21.60 
  -2 -12  -7  285.17   11.30 
   2  12   8   22.60    6.40 
   2  12   8   21.40   10.00 
   2  12   8   41.70   11.00 
  -2  12  -8   37.10   12.00 
   2 -12   8   15.90    6.50 
  -2 -12  -8   21.60    8.90 
  -2 -12  -8   47.20   11.20 
  -2 -12  -8   33.10   11.20 
  -2 -12  -8   39.40    4.40 
  -2 -12  -8   49.50   12.30 
   2 -12   8   25.80    8.30 
   2  12   9  278.07   25.80 
  -2  12  -9  228.88   19.80 
   2  12   9  178.38   18.90 
   2  12   9  208.08   19.70 
   2 -12   9  225.78   20.60 
  -2 -12  -9  212.38   20.80 
  -2 -12  -9  223.38   10.80 
  -2 -12  -9  235.38   19.80 
   2 -12   9  234.18   16.70 
  -2 -12  -9  141.19   20.70 
   2  12  10   10.90    7.20 
   2  12  10   34.30   12.10 
  -2  12 -10   10.90   11.60 
   2  12  10    4.50   11.40 
  -2 -12 -10   29.20    5.60 
  -2 -12 -10   12.40   10.40 
  -2 -12 -10   18.90   13.30 
   2 -12  10   13.40    9.10 
  -2 -12 -10   41.80   13.30 
  -2  12 -11   55.59   14.70 
   2  12  11   58.59   14.70 
   2  12  11   23.70   13.10 
  -2 -12 -11   49.40   14.50 
  -2 -12 -11   17.90   14.10 
  -2 -12 -11   60.29    7.50 
   2 -12  11   44.50   11.00 
   2  12  12   21.40   13.40 
   2  12  12    8.00   13.60 
  -2  12 -12   17.70   13.00 
  -2 -12 -12   22.90   13.70 
   2 -12  12   21.90   10.10 
  -2 -12 -12   26.40    6.90 
  -2 -12 -12   25.10   14.50 
   2  12  13   20.00   15.40 
   2  12  13   21.50   13.90 
  -2  12 -13   23.80   13.40 
   2 -12  13   22.70   11.40 
  -2 -12 -13   27.00   15.10 
  -2 -12 -13   13.10   12.80 
   2 -12  13   13.40   13.30 
   2  12  14  -29.50   13.50 
  -2  12 -14  -22.20   12.00 
  -2 -12 -14    1.60   14.30 
   2 -12  14   -3.20    9.90 
  -2 -12 -14   20.70   13.80 
   2 -12  14   19.60   11.30 
   2  12  15  -21.70   14.60 
  -2  12 -15    8.60   14.20 
  -2 -12 -15   28.90   16.00 
   2 -12  15   17.70   14.60 
  -2 -12 -15    2.80   15.50 
   2 -12  15   10.50   11.70 
  -2  12 -16   26.40   15.00 
   2 -12  16   -3.90   11.00 
  -2 -12 -16   -2.00   14.30 
   2 -12  16    5.10   14.30 
  -2 -12 -16    4.10   14.40 
   2  12  17  -39.70   16.40 
  -2  12 -17   25.30   15.10 
  -2 -12 -17   26.00   16.70 
  -2 -12 -17   13.70   15.90 
   2 -12  17    9.00   15.80 
   2 -12  17   12.40   13.70 
  -2  12 -18   33.70   16.00 
   2 -12  18   18.60   16.60 
   2 -12  18   13.20   13.50 
   2  14 -17    5.40   14.20 
  -2 -14  17   -6.40   14.30 
  -2 -14  17    3.80   10.10 
  -2  14  16   23.40   21.50 
   2  14 -16   48.90   17.20 
  -2 -14  16   30.60   11.30 
  -2 -14  16   31.50   17.20 
   2  14 -15    3.30   14.40 
  -2  14  15  -16.40   16.00 
  -2 -14  15   -7.30   12.60 
  -2 -14  15   12.20    9.10 
  -2  14  14   58.29   21.70 
   2  14 -14  114.59   20.00 
  -2 -14  14   89.19   20.00 
  -2 -14  14  126.79   14.00 
  -2  14  13   14.30   14.10 
   2  14 -13   20.70   13.90 
  -2  14  13    0.20   14.90 
   2 -14 -13   36.20   14.80 
  -2 -14  13   10.00    8.00 
  -2 -14  13   22.10   13.80 
  -2  14  12  167.98   22.10 
  -2  14  12  157.58   21.30 
  -2  14  12  147.69   18.80 
  -2  14  12  120.39   22.30 
   2  14 -12  152.98   20.60 
  -2 -14  12  144.69   13.60 
  -2 -14  12  114.59   20.00 
   2 -14 -12  101.29   19.30 
   2 -14 -12  117.09   19.70 
  -2  14  11   23.40   13.50 
  -2  14  11    3.10   13.10 
  -2  14  11    4.60   11.50 
  -2  14  11   -0.10    5.50 
   2  14 -11   17.50   12.40 
   2 -14 -11   27.30   13.20 
   2 -14 -11   12.10   11.40 
  -2 -14  11    9.40    6.80 
  -2 -14  11    4.50   10.80 
  -2  14  10  189.38   21.20 
   2  14 -10  201.18   20.30 
  -2  14  10  214.08   22.60 
  -2  14  10  192.28   17.30 
  -2  14  10  169.18   21.70 
  -2 -14  10  115.69   18.90 
  -2 -14  10  161.28   12.50 
   2 -14 -10  191.48   21.30 
   2 -14 -10  111.39   18.50 
   2  14  -9    2.30    8.70 
  -2  14   9    3.20   14.30 
  -2  14   9   22.80   13.40 
  -2  14   9    1.70   11.00 
  -2  14   9   21.10   11.40 
  -2  14   9    2.40    4.30 
  -2 -14   9    3.20    5.20 
  -2 -14   9   12.30    5.80 
   2 -14  -9    2.50    9.90 
   2 -14  -9   -6.80    9.00 
   2 -14  -9   -3.60   10.50 
  -2  14   8  132.69   19.70 
  -2  14   8  176.98   18.90 
  -2  14   8  196.78   18.90 
   2  14  -8  191.98   19.10 
  -2  14   8  191.88   24.00 
  -2  14   8  182.48   13.60 
  -2 -14   8  179.28   11.20 
   2 -14  -8  160.78   19.30 
   2 -14  -8  155.68   17.90 
   2 -14  -8  191.98   25.10 
  -2 -14   8  183.08   10.80 
  -2  14   7    5.40    3.20 
  -2  14   7   16.90   13.00 
  -2  14   7   10.60   10.90 
   2  14  -7    2.90    9.90 
  -2  14   7   12.40    9.00 
  -2  14   7    0.50    9.50 
   2 -14  -7   12.60    9.30 
   2 -14  -7    2.10   10.80 
   2 -14  -7   14.30    9.30 
  -2 -14   7   13.00    4.50 
  -2 -14   7   14.30    4.40 
  -2  14   6  461.65   32.20 
  -2  14   6  414.06   24.30 
   2  14  -6  416.56   23.50 
  -2  14   6  397.16   28.50 
  -2 -14   6  406.86   17.20 
  -2 -14   6  426.96   26.40 
   2 -14  -6  460.45   26.30 
   2 -14  -6  417.76   30.10 
   2 -14  -6  435.66   24.90 
  -2 -14   6  410.76   16.80 
   2  14  -5  209.68   21.30 
  -2  14   5  187.68   20.40 
  -2  14   5  195.08   17.40 
   2  14  -5  191.28   15.60 
  -2  14   5  180.58   22.20 
   2 -14  -5  209.68   17.00 
  -2 -14   5  202.58    9.90 
  -2 -14   5  207.58   10.60 
   2 -14  -5  196.18   22.20 
  -2 -14   5  196.08   19.10 
   2 -14  -5  221.38   18.00 
  -2  14   4  553.24   31.80 
   2  14  -4  585.14   32.90 
  -2  14   4  546.05   27.40 
  -2  14   4  573.74   34.60 
   2  14  -4  569.84   26.40 
  -2  14   4  557.84   32.70 
   2 -14  -4  573.34   32.70 
   2 -14  -4  516.25   28.20 
  -2 -14   4  562.24   30.40 
  -2 -14   4  547.95   21.30 
  -2 -14   4  582.44   22.10 
   2 -14  -4  582.04   28.70 
   2  14  -3   11.20   11.20 
  -2  14   3    5.30    6.90 
  -2  14   3    2.90    7.60 
  -2  14   3   14.40   10.90 
  -2  14   3    1.80    5.80 
   2  14  -3    8.10    7.40 
  -2 -14   3    6.70    6.00 
  -2 -14   3   11.60    7.30 
  -2 -14   3    7.30    4.10 
   2 -14  -3    7.20    6.80 
  -2 -14   3    2.90    4.10 
   2 -14  -3    4.00    8.70 
  -2 -14   3    3.90    4.40 
   2 -14  -3   -3.30    6.90 
  -2 -14   3    3.90    4.10 
  -2  14   2  734.43   31.60 
   2  14  -2  749.82   31.50 
   2  14  -2  792.32   39.20 
  -2  14   2  752.52   38.00 
  -2  14   2  787.32   27.60 
  -2  14   2  777.22   32.40 
   2 -14  -2  827.52   37.10 
  -2 -14   2  763.62   29.20 
   2 -14  -2  761.22   33.90 
  -2 -14   2  788.22   31.80 
  -2 -14   2  784.32   30.00 
  -2 -14   2  767.62   29.40 
   2 -14  -2  774.02   28.00 
  -2 -14   2  786.02   29.70 
  -2 -14   2  818.82   37.90 
   2 -14  -2  780.52   33.50 
   2  14  -1   -7.00   10.00 
  -2  14   1    9.30    6.40 
  -2  14   1    9.80    8.70 
  -2  14   1    0.50    4.00 
  -2  14   1    6.50    4.50 
  -2  14   1    9.30    5.20 
   2  14  -1    4.80    5.80 
   2 -14  -1   16.10    6.80 
  -2 -14   1    2.80    5.10 
   2 -14  -1    7.60    7.90 
  -2 -14   1   -4.80    5.60 
   2 -14  -1    0.70    3.10 
  -2 -14   1    2.80    5.40 
  -2 -14   1   12.30    5.60 
  -2 -14   1    3.50    4.90 
  -2 -14   1    3.00    3.90 
   2 -14  -1    5.60    5.60 
  -2 -14   1   12.50    5.40 
   2  14   0  492.75   28.20 
  -2  14   0  517.15   23.50 
  -2  14   0  511.85   21.20 
  -2  14   0  494.95   21.80 
   2  14   0  538.15   28.20 
  -2  14   0  462.05   28.60 
  -2  14   0  486.95   21.50 
  -2 -14   0  507.05   22.90 
   2 -14   0  478.85   24.50 
  -2 -14   0  510.75   29.70 
  -2 -14   0  510.55   22.60 
  -2 -14   0  489.15   23.00 
   2 -14   0  511.15   24.70 
   2 -14   0  506.35   24.90 
  -2 -14   0  524.85   27.90 
  -2 -14   0  506.25   21.20 
   2 -14   0  499.15   23.90 
  -2 -14   0  469.45   22.10 
  -2  14  -1   31.80   12.10 
   2  14   1   29.60   12.40 
  -2  14  -1   22.30    5.20 
   2  14   1   14.50    4.00 
   2  14   1   11.20    6.00 
  -2  14  -1   21.80    6.30 
  -2  14  -1   19.20    5.50 
   2  14   1   12.70    4.00 
  -2 -14  -1   21.10    6.90 
  -2 -14  -1    9.40    2.80 
   2 -14   1    4.60    4.50 
  -2 -14  -1   13.00    4.70 
  -2 -14  -1   17.60    6.90 
  -2 -14  -1    8.60    6.50 
  -2 -14  -1    8.70    6.10 
   2 -14   1    4.70    7.00 
   2 -14   1    7.80    5.20 
  -2 -14  -1   13.90    7.10 
  -2  14  -2  654.43   34.10 
   2  14   2  588.74   33.80 
   2  14   2  667.93   25.50 
  -2  14  -2  621.34   23.60 
  -2  14  -2  645.34   23.90 
   2  14   2  620.24   25.40 
   2  14   2  620.34   38.90 
  -2  14  -2  621.34   26.80 
  -2 -14  -2  630.84   23.50 
  -2 -14  -2  632.64   28.30 
  -2 -14  -2  612.14   35.20 
   2 -14   2  644.04   26.70 
  -2 -14  -2  588.34   27.30 
  -2 -14  -2  627.04   31.90 
   2 -14   2  622.44   27.70 
   2 -14   2  652.13   33.20 
   2 -14   2  628.24   27.10 
  -2 -14  -2  622.14   27.90 
  -2  14  -3  124.09   11.20 
   2  14   3  111.49   11.50 
   2  14   3  103.99   10.40 
   2  14   3  101.69    9.70 
   2  14   3  127.29   18.30 
  -2  14  -3  102.19   16.90 
  -2  14  -3  114.39    5.80 
  -2  14  -3  113.19    6.00 
   2 -14   3  124.29   10.40 
   2 -14   3  113.79   10.80 
   2 -14   3  126.69   17.40 
  -2 -14  -3   79.09   11.10 
  -2 -14  -3  100.19   11.90 
  -2 -14  -3   73.19   12.60 
  -2 -14  -3  106.79   12.10 
  -2 -14  -3  110.49    6.30 
   2 -14   3  121.59   11.60 
   2  14   4  492.55   24.10 
   2  14   4  490.15   31.20 
   2  14   4  522.05   24.20 
   2  14   4  478.75   23.60 
  -2  14  -4  544.25   31.10 
  -2  14  -4  495.85   24.30 
  -2 -14  -4  458.35   27.60 
   2 -14   4  496.45   23.40 
  -2 -14  -4  533.55   34.40 
   2 -14   4  465.15   30.60 
   2 -14   4  495.45   22.10 
   2 -14   4  514.55   23.00 
  -2 -14  -4  446.26   25.00 
  -2 -14  -4  507.35   25.10 
   2  14   5   20.90    8.10 
  -2  14  -5    1.00    9.00 
   2  14   5   20.00   12.60 
   2  14   5   11.20    8.60 
   2  14   5   20.80    8.40 
  -2 -14  -5   19.40    9.10 
  -2 -14  -5   -5.20    6.50 
  -2 -14  -5    6.20    7.50 
   2 -14   5   16.50    7.00 
   2 -14   5   13.60    4.20 
  -2 -14  -5    8.20    9.70 
   2 -14   5   10.70    6.90 
   2  14   6  166.38   22.50 
  -2  14  -6  164.18   16.50 
   2  14   6  159.28   15.90 
   2  14   6  172.48   19.90 
   2  14   6  155.38   15.00 
  -2 -14  -6  183.38   16.90 
   2 -14   6  167.88   13.20 
  -2 -14  -6  154.78   15.60 
  -2 -14  -6  137.59   16.90 
  -2 -14  -6  104.59   16.70 
   2 -14   6  163.98   13.50 
   2 -14   6  158.48   13.40 
  -2  14  -7   -1.20   10.40 
   2  14   7    4.80    8.60 
   2  14   7   -1.90    8.40 
   2  14   7    2.40   10.90 
   2  14   7   -0.80    2.00 
  -2 -14  -7    6.00    8.70 
   2 -14   7    5.90    6.80 
   2 -14   7    1.00    4.50 
  -2 -14  -7   20.30   10.50 
  -2 -14  -7    7.60   11.20 
   2  14   8  123.39   12.30 
   2  14   8  120.89   15.50 
   2  14   8  113.69   19.70 
  -2  14  -8  154.58   17.80 
   2  14   8  153.08   17.70 
   2 -14   8  145.89   15.70 
   2 -14   8  132.69   13.30 
  -2 -14  -8   89.69   17.40 
  -2 -14  -8  134.99   16.90 
  -2 -14  -8  112.59   16.50 
   2  14   9   -4.80    5.50 
   2  14   9    8.80   10.90 
   2  14   9   11.70   10.30 
  -2  14  -9    5.40   11.50 
   2 -14   9    7.20    6.50 
   2 -14   9    0.30    7.70 
  -2 -14  -9   13.20   12.80 
  -2 -14  -9    1.50   10.70 
  -2 -14  -9   24.40   12.20 
   2  14  10  123.39   18.10 
  -2  14 -10  180.38   20.60 
   2  14  10  180.98   20.20 
   2 -14  10  181.48   16.20 
  -2 -14 -10  206.58   22.30 
  -2 -14 -10  131.39   21.30 
   2  14  11   16.10   12.10 
   2  14  11   -5.30   11.50 
  -2  14 -11   -6.10   10.90 
   2 -14  11    8.40    9.30 
  -2 -14 -11   15.60   12.60 
  -2 -14 -11   17.50   14.20 
  -2  14 -12  164.28   20.90 
   2  14  12   92.99   18.00 
  -2 -14 -12  118.99   19.40 
  -2 -14 -12   75.19   19.50 
   2 -14  12  150.98   16.40 
   2  14  13   -1.90   14.20 
  -2  14 -13   23.40   14.10 
  -2 -14 -13   -2.80   12.90 
  -2 -14 -13   27.70   14.90 
   2 -14  13   11.80   13.40 
   2 -14  13    6.10   10.10 
  -2 -14 -13    0.50   13.70 
  -2  14 -14    4.70   13.90 
   2  14  14  -14.30   14.60 
  -2 -14 -14   10.00   14.70 
   2 -14  14    4.50   11.00 
   2 -14  14   13.20   14.60 
  -2 -14 -14   16.80   15.90 
  -2 -14 -14   16.00   14.60 
  -2  14 -15    1.00   14.00 
   2  14  15  -34.10   14.70 
   2 -14  15   18.00   14.80 
   2 -14  15   10.10   11.50 
  -2 -14 -15   20.90   15.30 
  -2 -14 -15    6.60   12.80 
   2  14  16   -9.10   16.40 
  -2  14 -16   47.70   17.60 
  -2 -14 -16   13.30   16.50 
  -2 -14 -16   37.00   18.10 
   2 -14  16   36.10   13.50 
   2 -14  16   28.50   17.30 
  -2  14 -17   21.40   15.90 
   2 -14  17   11.70   12.90 
  -2 -14 -17   28.00   17.40 
   2 -14  17   11.50   16.80 
  -2  16  17  -41.70   17.80 
   2  16 -17   16.40   19.20 
  -2 -16  17   -8.30   18.60 
  -2  16  16   -4.20   19.50 
   2  16 -16   13.00   14.90 
  -2  16  16   10.80   16.70 
  -2 -16  16   16.10    9.80 
  -2 -16  16    4.00   14.70 
   2  16 -15    9.80   14.50 
  -2  16  15  -13.40   17.20 
  -2  16  15    1.10   15.40 
  -2 -16  15    8.20    8.70 
  -2 -16  15   10.10   15.00 
   2  16 -14   35.60   16.30 
  -2  16  14   23.10   17.50 
  -2  16  14   47.90   17.50 
  -2 -16  14   41.60   10.10 
  -2 -16  14   33.60   16.80 
   2  16 -13   74.89   17.80 
  -2  16  13   69.79   19.20 
  -2  16  13   90.69   19.20 
  -2  16  13   76.89   23.80 
  -2 -16  13   93.79   11.60 
   2 -16 -13  112.39   20.70 
  -2 -16  13   62.39   18.30 
  -2  16  12   76.79   19.30 
  -2  16  12  112.29   19.70 
   2  16 -12  133.09   20.00 
  -2  16  12   78.29   23.20 
  -2 -16  12   73.89   17.80 
   2 -16 -12   85.69   18.90 
  -2 -16  12  103.29   11.30 
   2 -16 -12   84.59   18.40 
   2  16 -11  165.58   20.90 
  -2  16  11  144.09   23.10 
  -2  16  11  189.98   22.50 
  -2  16  11  163.98   27.10 
   2 -16 -11  158.58   21.80 
   2 -16 -11  116.39   19.60 
  -2 -16  11  156.78   13.00 
  -2 -16  11  113.19   19.70 
  -2  16  10   81.99   16.70 
   2  16 -10   88.99   16.50 
  -2  16  10   53.19   15.80 
  -2  16  10   85.19   21.10 
  -2 -16  10   86.19    9.40 
   2 -16 -10   48.40   14.90 
   2 -16 -10   88.19   17.10 
  -2  16   9  164.38   24.90 
  -2  16   9  186.98   20.60 
  -2  16   9  103.39   18.30 
  -2  16   9  154.88   19.50 
   2  16  -9  167.98   19.80 
   2 -16  -9  115.09   18.90 
   2 -16  -9  145.59   20.00 
  -2 -16   9  161.48   11.40 
  -2  16   8  127.19   17.00 
   2  16  -8  200.68   18.50 
  -2  16   8  180.28   19.40 
  -2  16   8  130.79   23.00 
  -2  16   8  133.29   20.30 
   2 -16  -8   93.89   16.40 
  -2 -16   8  171.18   10.70 
   2 -16  -8  186.78   20.90 
  -2  16   7  191.88   18.80 
  -2  16   7  249.08   25.20 
   2  16  -7  198.78   18.50 
  -2  16   7  233.08   27.60 
   2 -16  -7  225.68   19.80 
  -2 -16   7  218.08   11.90 
   2 -16  -7  214.98   21.80 
   2 -16  -7  221.28   27.70 
  -2 -16   7  235.38   22.00 
  -2 -16   7  209.28   11.70 
   2  16  -6   59.09   17.10 
  -2  16   6   72.09   17.60 
   2  16  -6  101.69   14.70 
  -2  16   6   66.09   12.50 
  -2  16   6   38.50   12.50 
  -2 -16   6   76.89    7.20 
   2 -16  -6   47.80   11.30 
  -2 -16   6   66.49    6.90 
  -2 -16   6   53.99   10.10 
   2 -16  -6   87.89   14.90 
   2 -16  -6   42.10   11.80 
   2  16  -5  107.09   14.30 
  -2  16   5   65.59   13.50 
  -2  16   5   80.99   17.00 
  -2  16   5   89.69   14.10 
   2  16  -5   80.19   17.70 
  -2 -16   5   90.29    8.40 
   2 -16  -5   65.19   12.50 
   2 -16  -5   93.09   15.20 
  -2 -16   5   67.09   10.40 
   2 -16  -5   92.69   13.60 
  -2 -16   5   92.09    7.90 
  -2  16   4  104.09   13.60 
   2  16  -4  103.79   17.20 
  -2  16   4  123.79   18.70 
   2  16  -4  108.89   13.20 
  -2 -16   4  110.99    9.00 
   2 -16  -4  127.39   15.40 
   2 -16  -4  110.89   14.40 
  -2 -16   4   78.39   11.20 
   2 -16  -4   77.69   12.50 
  -2 -16   4  107.19    8.80 
  -2 -16   4  105.49    8.50 
  -2  16   3  249.97   22.60 
  -2  16   3  212.38   15.40 
   2  16  -3  202.88   15.20 
  -2  16   3  217.28   16.10 
   2  16  -3  230.38   24.90 
  -2  16   3  197.28   19.90 
  -2 -16   3  199.88   19.60 
  -2 -16   3  207.98   12.00 
   2 -16  -3  223.48   21.10 
   2 -16  -3  185.18   17.00 
  -2 -16   3  193.28   12.40 
   2 -16  -3  225.98   16.80 
  -2 -16   3  190.38   12.30 
  -2  16   2  244.28   10.90 
  -2  16   2  222.08   15.50 
  -2  16   2  241.18   15.20 
  -2  16   2  209.38   18.20 
   2  16  -2  212.28   22.60 
   2  16  -2  236.08   15.30 
  -2  16   2  243.68   20.30 
   2 -16  -2  221.28   16.70 
   2 -16  -2  236.88   17.60 
  -2 -16   2  229.58   13.30 
  -2 -16   2  250.77   14.20 
   2 -16  -2  268.57   21.40 
  -2 -16   2  235.78   13.80 
  -2 -16   2  231.88   13.70 
  -2 -16   2  260.57   15.50 
  -2 -16   2  231.58   21.20 
  -2  16   1  268.97   23.50 
   2  16  -1  290.07   24.50 
  -2  16   1  276.37   16.00 
  -2  16   1  265.97   15.20 
  -2  16   1  284.87   13.80 
  -2 -16   1  284.47   15.70 
   2 -16  -1  278.27   18.40 
   2 -16  -1  297.67   15.40 
  -2 -16   1  319.47   24.00 
  -2 -16   1  294.27   18.70 
   2 -16  -1  277.47   17.80 
  -2 -16   1  284.27   16.40 
  -2 -16   1  273.57   16.00 
  -2 -16   1  279.17   15.70 
   2 -16  -1  325.47   21.80 
   2  16   0   88.69   12.90 
  -2  16   0  133.09   10.60 
  -2  16   0  117.29   11.90 
  -2  16   0  151.58   10.40 
  -2  16   0  107.49   10.10 
  -2  16   0  126.89   19.00 
   2  16   0  129.39   19.40 
  -2 -16   0   79.39   12.20 
   2 -16   0  112.99   13.30 
   2 -16   0  120.49   14.80 
  -2 -16   0  137.59   12.60 
  -2 -16   0  132.19   11.60 
   2 -16   0  146.39   14.70 
  -2 -16   0  144.69   12.00 
  -2 -16   0  137.19   10.30 
  -2 -16   0  134.69   11.60 
   2 -16   0  136.39   12.50 
  -2  16  -1  156.18   10.40 
   2  16   1  167.68    8.20 
   2  16   1  163.28    8.20 
   2  16   1  186.18   22.00 
  -2  16  -1  196.78   12.50 
  -2  16  -1  169.58   10.60 
  -2  16  -1  189.38   21.00 
  -2 -16  -1  166.48   13.90 
   2 -16   1  169.78   17.10 
  -2 -16  -1  172.08   21.40 
  -2 -16  -1  148.69    9.60 
  -2 -16  -1  161.88   14.00 
  -2 -16  -1  186.68   10.10 
   2 -16   1  168.78   15.10 
  -2 -16  -1  183.38   10.50 
   2 -16   1  171.98   13.90 
   2 -16   1  169.08   14.90 
  -2 -16  -1  174.68   14.00 
  -2  16  -2  235.28   11.00 
  -2  16  -2  249.97   15.70 
   2  16   2  277.47   24.20 
   2  16   2  252.37   13.40 
   2  16   2  261.57   13.60 
  -2  16  -2  261.97   23.50 
  -2  16  -2  249.97   11.20 
  -2 -16  -2  253.27   17.10 
  -2 -16  -2  261.67   26.00 
  -2 -16  -2  245.38   11.90 
   2 -16   2  241.48   16.30 
   2 -16   2  224.28   16.40 
  -2 -16  -2  252.67   17.30 
   2 -16   2  223.88   20.90 
  -2 -16  -2  293.67   18.50 
   2  16   3  230.58   23.30 
   2  16   3  233.98   14.40 
  -2  16  -3  245.98   16.50 
  -2  16  -3  226.98   20.70 
   2  16   3  251.87   14.90 
   2 -16   3  211.48   14.70 
  -2 -16  -3  269.57   19.00 
   2 -16   3  220.98   21.50 
   2 -16   3  238.88   16.30 
  -2 -16  -3  226.38   17.50 
  -2 -16  -3  287.27   27.80 
  -2 -16  -3  242.88   18.30 
   2  16   4  424.86   21.70 
   2  16   4  437.26   30.80 
   2  16   4  390.86   22.70 
   2  16   4  430.86   22.40 
  -2  16  -4  479.05   24.20 
  -2  16  -4  464.15   30.70 
  -2 -16  -4  418.76   24.60 
  -2 -16  -4  434.06   25.50 
   2 -16   4  445.26   21.00 
  -2 -16  -4  413.16   24.20 
  -2 -16  -4  413.46   32.70 
   2 -16   4  426.76   22.00 
   2  16   5   83.59   12.00 
   2  16   5   80.39   18.10 
  -2  16  -5   74.49   12.70 
   2  16   5   78.89   11.60 
   2  16   5   80.19   11.60 
  -2  16  -5   94.09   18.70 
   2 -16   5   50.79    6.50 
  -2 -16  -5   79.29   14.10 
  -2 -16  -5   57.39   12.80 
  -2 -16  -5   65.19   11.70 
  -2 -16  -5   50.89   13.50 
   2 -16   5   64.39   10.10 
   2  16   6   79.99   13.20 
  -2  16  -6  100.99   15.00 
   2  16   6   82.99   19.80 
   2  16   6   87.19   13.40 
  -2 -16  -6   64.89   16.10 
   2 -16   6   90.79   11.20 
   2 -16   6   91.69   11.40 
  -2 -16  -6   84.99   13.40 
  -2 -16  -6   78.19   14.60 
  -2 -16  -6   72.29   14.10 
  -2  16  -7   25.20   11.50 
   2  16   7   49.90   11.30 
   2  16   7   16.60    9.50 
   2  16   7   38.30   14.60 
   2  16   7   41.20   11.40 
   2 -16   7   37.80    9.10 
   2 -16   7   26.20    6.20 
  -2 -16  -7   43.70   12.60 
  -2 -16  -7   37.70   12.80 
   2 -16   7   24.80    6.20 
  -2 -16  -7   28.00   12.70 
  -2 -16  -7   35.70   14.30 
   2  16   8  157.48   23.70 
  -2  16  -8  172.78   19.20 
   2  16   8  142.79   20.50 
   2  16   8  151.48   17.70 
   2  16   8  101.79   15.20 
  -2 -16  -8   92.19   18.90 
  -2 -16  -8  117.99   17.60 
   2 -16   8  133.39   13.10 
  -2 -16  -8  167.98   19.80 
   2  16   9   67.79   14.00 
   2  16   9   81.89   21.80 
  -2  16  -9   82.19   16.00 
   2  16   9   83.69   15.50 
  -2 -16  -9   63.59   17.30 
  -2 -16  -9   99.69   17.00 
   2 -16   9   93.09   11.80 
  -2 -16  -9   77.29   16.30 
   2  16  10   62.39   14.90 
   2  16  10   83.49   22.80 
  -2  16 -10   91.29   17.00 
  -2 -16 -10  109.99   17.70 
   2 -16  10   82.99   12.30 
  -2 -16 -10   93.59   18.30 
  -2 -16 -10   45.60   16.60 
   2  16  11   31.20   13.80 
  -2  16 -11   46.40   14.70 
   2  16  11   18.00   20.00 
  -2 -16 -11   13.80   14.80 
   2 -16  11   25.70   10.20 
  -2 -16 -11   42.20   15.40 
  -2 -16 -11   36.50   14.70 
   2  16  12   21.70   14.80 
  -2  16 -12   50.19   15.90 
   2 -16  12   26.10   10.80 
  -2 -16 -12   22.70   15.10 
  -2 -16 -12   26.40   15.40 
  -2 -16 -12    3.20   14.50 
  -2  16 -13   13.40   14.50 
   2  16  13   -3.20   13.00 
  -2 -16 -13   21.30   16.10 
   2 -16  13   26.80   11.40 
  -2 -16 -13   25.00   17.40 
  -2 -16 -13   10.50   14.50 
   2  16  14    6.80   15.40 
  -2  16 -14   41.00   16.70 
   2 -16  14   41.50   13.20 
   2 -16  14   36.60   16.50 
  -2 -16 -14   64.79   19.30 
  -2 -16 -14   41.50   16.80 
  -2 -16 -14   40.10   17.50 
  -2  16 -15   40.80   16.20 
   2  16  15  -12.30   16.30 
   2 -16  15    9.80   15.30 
  -2 -16 -15   22.20   15.60 
  -2 -16 -15   -1.00   14.40 
   2 -16  15   10.10   10.90 
  -2  16 -16   32.20   16.30 
  -2 -16 -16   16.20   17.50 
   2 -16  16   12.00   16.70 
   2 -16  16   19.90   12.70 
  -2  18  16    7.40   18.20 
  -2  18  16   10.70   16.90 
   2  18 -16    8.80   16.20 
  -2  18  16  -12.80   21.90 
  -2 -18  16    7.80   10.40 
  -2 -18  16  -11.40   13.10 
  -2  18  15   45.50   19.30 
   2  18 -15   61.69   18.80 
  -2  18  15    8.10   21.50 
  -2  18  15   28.80   20.50 
  -2 -18  15   52.49   19.20 
  -2 -18  15   53.69   10.90 
   2  18 -14   42.20   16.70 
  -2  18  14   -2.50   14.50 
  -2  18  14  -20.80   16.40 
  -2  18  14  -10.20   19.40 
  -2 -18  14   12.20    8.40 
  -2 -18  14  -10.10   12.90 
  -2  18  13  137.49   23.50 
   2  18 -13  146.19   21.80 
  -2  18  13  118.79   23.40 
  -2  18  13  149.99   28.80 
   2 -18 -13  157.38   23.20 
  -2 -18  13  134.79   13.60 
  -2 -18  13  125.89   22.60 
  -2  18  12   -8.40   17.50 
  -2  18  12    0.00   13.30 
   2  18 -12    2.40   12.90 
  -2  18  12   27.60   15.40 
  -2 -18  12    1.80    6.70 
   2 -18 -12   10.40   13.20 
   2 -18 -12  -21.70   11.90 
  -2 -18  12   -4.40   12.20 
  -2  18  11  106.79   20.30 
  -2  18  11  154.88   26.90 
   2  18 -11  149.69   20.40 
  -2  18  11  156.28   22.80 
  -2 -18  11  112.19   20.50 
  -2 -18  11  155.28   12.20 
   2 -18 -11  153.98   22.40 
   2 -18 -11   81.29   17.70 
  -2  18  10   -6.20   12.20 
   2  18 -10    2.10   11.70 
  -2  18  10    8.70   13.00 
  -2  18  10   22.20   18.10 
  -2 -18  10    8.90    6.20 
   2 -18 -10   -2.30   11.80 
   2 -18 -10   24.60   12.60 
  -2  18   9  130.79   19.80 
  -2  18   9  116.29   19.50 
   2  18  -9  170.98   20.60 
  -2  18   9  169.18   26.50 
  -2 -18   9   97.69   14.60 
   2 -18  -9  190.78   22.60 
  -2 -18   9  135.49   11.10 
   2 -18  -9  108.99   18.70 
  -2  18   8   38.00   17.50 
   2  18  -8   26.20   12.30 
  -2  18   8   11.80   12.30 
  -2  18   8   21.60   12.50 
   2 -18  -8   12.40   10.60 
   2 -18  -8   14.30   12.40 
  -2 -18   8   25.40    6.20 
  -2 -18   8   28.80    9.40 
  -2  18   7  321.87   23.50 
  -2  18   7  358.26   32.80 
   2  18  -7  350.86   24.90 
  -2  18   7  334.67   30.20 
   2 -18  -7  402.96   34.10 
   2 -18  -7  361.16   26.70 
  -2 -18   7  335.97   16.10 
  -2 -18   7  324.27   26.30 
   2  18  -6  -12.00   13.30 
  -2  18   6   -7.90   13.70 
   2  18  -6   -0.40   10.60 
  -2  18   6    9.00    9.70 
   2 -18  -6   -6.70   10.40 
  -2 -18   6   -1.80    4.90 
   2 -18  -6    5.80    9.80 
  -2 -18   6   -4.10    6.60 
   2  18  -5  273.27   20.60 
  -2  18   5  233.68   25.50 
  -2  18   5  240.68   20.00 
   2  18  -5  244.18   28.40 
  -2 -18   5  259.37   14.10 
   2 -18  -5  290.87   24.10 
  -2 -18   5  280.27   14.50 
  -2 -18   5  257.87   15.50 
  -2 -18   5  284.07   23.70 
   2 -18  -5  283.47   27.30 
  -2  18   4   13.00   11.10 
  -2  18   4    1.10    8.70 
   2  18  -4    8.00    8.40 
   2  18  -4   11.80   11.80 
   2 -18  -4   -0.80    9.70 
  -2 -18   4    3.20    5.40 
   2 -18  -4   -4.20    9.50 
  -2 -18   4    0.40    5.50 
   2 -18  -4    2.40    8.40 
  -2 -18   4    4.60    5.40 
  -2 -18   4   -5.90    6.80 
  -2  18   3  186.08   15.70 
  -2  18   3  212.88   23.30 
  -2  18   3  204.38   15.50 
   2  18  -3  182.18   15.90 
   2  18  -3  185.68   24.70 
  -2  18   3  179.18   20.00 
  -2 -18   3  170.48   12.90 
   2 -18  -3  193.78   18.10 
   2 -18  -3  191.48   22.20 
  -2 -18   3  172.58   20.20 
  -2 -18   3  174.18   12.60 
   2 -18  -3  196.88   18.10 
  -2 -18   3  207.98   13.30 
  -2  18   2   -2.80    6.10 
  -2  18   2   -6.10    6.80 
  -2  18   2    1.00    3.70 
   2  18  -2   -2.20   12.80 
  -2  18   2   -2.70    5.20 
  -2  18   2  -10.30   11.70 
   2  18  -2   -1.80    7.60 
   2 -18  -2    5.10   10.00 
  -2 -18   2   12.50    6.70 
   2 -18  -2   -1.00    8.60 
   2 -18  -2   -4.90    6.90 
  -2 -18   2   -6.70    5.90 
  -2 -18   2    4.50    4.90 
  -2 -18   2   -1.60    7.00 
  -2  18   1  139.29   12.40 
  -2  18   1  169.28   12.20 
   2  18  -1  142.89   21.70 
  -2  18   1  174.58   22.90 
  -2  18   1  160.38   10.30 
   2 -18  -1  144.59   10.60 
  -2 -18   1  148.59   12.50 
  -2 -18   1  148.79   13.20 
  -2 -18   1  165.78   14.90 
  -2 -18   1  104.19   14.10 
  -2 -18   1  153.78   13.70 
   2 -18  -1  178.38   16.20 
   2 -18  -1  152.28   18.20 
   2 -18  -1  159.28   16.80 
  -2  18   0   -0.70    5.40 
  -2  18   0    1.90    5.00 
   2  18   0  -12.30   11.70 
  -2  18   0   -0.20    5.80 
  -2  18   0    0.40   12.50 
   2 -18   0    4.80    8.80 
  -2 -18   0    3.30    7.50 
  -2 -18   0   -0.70    7.50 
  -2 -18   0    2.60    7.00 
  -2 -18   0   -8.00    6.30 
  -2 -18   0    4.80    3.70 
   2 -18   0   -5.30    6.00 
   2 -18   0   -2.40    4.20 
  -2 -18   0    1.00    5.70 
   2 -18   0   -1.30    6.90 
  -2 -18   0    5.80    3.50 
  -2  18  -1  295.27   25.80 
   2  18   1  245.48   25.50 
  -2  18  -1  252.67   12.50 
  -2  18  -1  256.17   12.60 
  -2  18  -1  248.88   15.50 
   2 -18   1  257.97   19.10 
  -2 -18  -1  268.37   18.00 
  -2 -18  -1  253.67   13.70 
  -2 -18  -1  258.37   17.60 
  -2 -18  -1  288.27   25.50 
   2 -18   1  239.28   18.40 
  -2 -18  -1  251.67   17.90 
   2 -18   1  250.17   17.80 
   2 -18   1  225.38   19.70 
   2  18   2   39.90    6.20 
  -2  18  -2   40.90    9.20 
   2  18   2   40.50    6.10 
  -2  18  -2   21.00   15.10 
   2  18   2   32.10   16.30 
   2 -18   2   40.90   10.20 
  -2 -18  -2   35.80   10.60 
   2 -18   2   12.00    7.20 
   2 -18   2   26.20    8.40 
  -2 -18  -2   47.60   10.60 
  -2 -18  -2   12.00   10.40 
  -2 -18  -2   36.80    9.90 
   2  18   3  793.72   31.60 
  -2  18  -3  708.13   40.60 
   2  18   3  754.12   43.10 
  -2  18  -3  793.82   34.10 
   2  18   3  783.42   31.50 
  -2 -18  -3  785.42   36.20 
   2 -18   3  770.62   41.20 
   2 -18   3  762.82   34.10 
  -2 -18  -3  793.02   35.90 
   2 -18   3  725.13   32.50 
  -2 -18  -3  828.62   46.00 
  -2 -18  -3  809.42   36.70 
   2  18   4   61.19    9.70 
  -2  18  -4   68.19   12.40 
   2  18   4   52.89    9.90 
   2  18   4   73.89   18.90 
  -2  18  -4   59.49   17.80 
   2 -18   4   79.29   11.50 
  -2 -18  -4   61.59   11.50 
  -2 -18  -4   38.70   12.80 
  -2 -18  -4   57.89   12.90 
  -2 -18  -4   49.70   13.00 
   2 -18   4   43.60    6.50 
   2  18   5  315.97   29.30 
  -2  18  -5  283.47   28.30 
   2  18   5  316.87   20.60 
  -2  18  -5  324.77   22.20 
   2  18   5  303.67   21.80 
  -2 -18  -5  340.17   33.70 
  -2 -18  -5  305.97   23.70 
  -2 -18  -5  300.97   22.20 
   2 -18   5  337.47   18.40 
   2 -18   5  330.57   20.10 
  -2 -18  -5  325.37   24.60 
  -2  18  -6    5.80   10.90 
   2  18   6    5.00   16.00 
   2  18   6   22.40    9.90 
   2 -18   6    6.30    4.90 
   2 -18   6   14.80    8.30 
  -2 -18  -6   16.00   11.40 
  -2 -18  -6    7.10   13.50 
  -2 -18  -6   27.90   12.50 
   2  18   7  116.69   15.10 
   2  18   7  119.59   23.30 
  -2  18  -7   94.29   16.30 
  -2 -18  -7  130.89   19.50 
  -2 -18  -7   65.89   17.10 
   2 -18   7  111.39   12.70 
  -2 -18  -7  102.39   16.40 
   2 -18   7   63.79    8.30 
   2  18   8   16.00   12.20 
  -2  18  -8   -9.30   10.10 
   2  18   8   -8.00   16.00 
  -2 -18  -8   -7.70   12.30 
   2 -18   8   11.70    8.10 
  -2 -18  -8   19.70   12.80 
  -2 -18  -8   23.20   12.00 
   2  18   9  103.19   17.50 
  -2  18  -9  131.09   18.30 
   2  18   9  114.69   24.60 
   2  18   9   84.49   15.70 
  -2 -18  -9   63.89   17.60 
   2 -18   9   96.19   12.70 
  -2 -18  -9   89.39   17.80 
  -2 -18  -9   86.09   17.40 
  -2  18 -10    7.80   11.80 
   2  18  10   -3.40   11.60 
   2  18  10    9.30   10.80 
   2  18  10    0.40   18.20 
   2 -18  10    6.00    8.60 
  -2 -18 -10    9.80   15.00 
  -2 -18 -10   -0.30   13.70 
  -2 -18 -10   30.50   15.30 
   2  18  11   73.29   16.60 
   2  18  11   92.19   25.40 
   2  18  11   51.39   14.60 
  -2  18 -11   96.49   17.80 
   2 -18  11   78.79   12.80 
  -2 -18 -11   89.09   18.60 
  -2 -18 -11   31.80   16.40 
  -2 -18 -11   88.89   18.90 
   2  18  12   -1.10   11.30 
  -2  18 -12    6.20   13.40 
   2  18  12    6.00   13.30 
   2  18  12    4.30   19.40 
  -2 -18 -12   -4.10   13.40 
   2 -18  12    6.90    9.60 
  -2 -18 -12    5.30   14.10 
  -2 -18 -12    0.60   14.80 
   2  18  13   16.30   14.40 
  -2  18 -13   45.70   15.70 
   2  18  13   39.90   20.00 
   2  18  13   38.90   16.30 
  -2 -18 -13   18.50   16.20 
  -2 -18 -13   35.10   18.00 
  -2 -18 -13   26.20   16.80 
   2 -18  13   42.00   12.40 
   2  18  14    7.30   21.20 
  -2  18 -14   24.90   14.90 
   2  18  14    9.80   15.10 
  -2 -18 -14   23.90   22.60 
   2 -18  14   -8.20    9.80 
   2 -18  14   19.80   15.20 
  -2 -18 -14    0.60   14.70 
  -2 -18 -14    5.10   15.20 
  -2  18 -15   34.40   16.90 
   2  18  15    8.10   24.00 
   2 -18  15   41.60   17.60 
  -2 -18 -15    2.30   14.40 
   2 -18  15   16.80   11.40 
  -2  20  14   56.99   24.70 
  -2  20  14   71.19   19.80 
   2  20 -14   96.99   20.60 
  -2  20  14   82.09   20.70 
  -2 -20  14   54.39   18.90 
  -2 -20  14   56.29   10.20 
  -2  20  13   19.40   15.70 
  -2  20  13   72.09   24.40 
  -2  20  13   47.50   17.40 
   2  20 -13   64.89   18.10 
  -2 -20  13   55.49   17.70 
  -2 -20  13   59.29    9.50 
  -2  20  12   36.70   21.30 
  -2  20  12   30.20   15.60 
   2  20 -12   39.70   15.80 
  -2  20  12   34.40   15.70 
  -2 -20  12   25.50   14.80 
   2 -20 -12    8.50   15.30 
   2 -20 -12   38.60   14.90 
  -2 -20  12   28.00    8.00 
   2  20 -11   69.49   17.20 
  -2  20  11   41.50   17.10 
  -2  20  11   28.00   20.10 
  -2  20  11   34.60   15.70 
   2 -20 -11   50.49   15.60 
  -2 -20  11   29.20   14.90 
  -2 -20  11   38.30    8.00 
   2 -20 -11   32.70   16.40 
  -2  20  10  124.49   25.10 
   2  20 -10  120.49   19.40 
  -2  20  10  124.09   20.70 
  -2  20  10   81.19   17.90 
  -2 -20  10  105.19   10.00 
   2 -20 -10   90.39   17.50 
   2 -20 -10  125.29   21.10 
   2  20  -9   76.79   15.90 
  -2  20   9   61.79   16.80 
  -2  20   9   86.99   23.00 
  -2  20   9   64.39   16.50 
   2 -20  -9   52.19   16.40 
  -2 -20   9   83.49    8.80 
  -2 -20   9   47.80   11.60 
   2 -20  -9   47.70   13.90 
  -2  20   8  112.09   17.70 
  -2  20   8  110.09   23.30 
   2  20  -8  104.69   16.50 
  -2  20   8   91.49   17.70 
   2 -20  -8  113.39   19.00 
  -2 -20   8   75.19   12.70 
   2 -20  -8   78.79   16.30 
  -2 -20   8   88.19    9.00 
  -2  20   7  230.48   21.40 
  -2  20   7  226.68   29.30 
   2  20  -7  230.78   21.70 
  -2 -20   7  203.98   12.70 
  -2 -20   7  194.68   12.70 
  -2 -20   7  197.98   22.60 
   2 -20  -7  219.98   23.80 
  -2  20   6  231.08   28.80 
  -2  20   6  202.88   19.70 
   2  20  -6  211.18   19.80 
   2  20  -6  182.98   27.10 
   2 -20  -6  229.68   25.60 
   2 -20  -6  191.58   22.20 
  -2 -20   6  179.88   12.40 
  -2 -20   6  169.58   12.40 
  -2 -20   6  208.18   23.10 
   2  20  -5  216.58   27.80 
  -2  20   5  207.58   27.00 
  -2  20   5  195.88   18.70 
   2  20  -5  190.88   18.40 
  -2 -20   5  197.78   13.50 
   2 -20  -5  240.08   23.60 
   2 -20  -5  205.48   25.70 
  -2 -20   5  199.08   13.40 
  -2 -20   5  203.08   22.80 
  -2  20   4  148.59   16.30 
   2  20  -4  194.68   18.30 
  -2  20   4  157.58   24.50 
   2  20  -4  181.18   26.10 
  -2 -20   4  168.68   13.00 
  -2 -20   4  163.28   21.50 
   2 -20  -4  199.48   24.40 
   2 -20  -4  176.68   20.00 
  -2 -20   4  163.78   13.20 
   2  20  -3  251.17   29.70 
  -2  20   3  283.37   19.00 
  -2  20   3  288.37   28.00 
   2  20  -3  258.97   18.50 
  -2 -20   3  242.98   24.70 
   2 -20  -3  285.87   25.10 
   2 -20  -3  263.67   21.50 
  -2 -20   3  270.57   23.00 
  -2 -20   3  254.37   16.50 
  -2 -20   3  255.67   16.50 
   2  20  -2  210.18   23.20 
  -2  20   2  231.78   16.40 
  -2  20   2  236.28   25.50 
   2 -20  -2  248.18   23.30 
  -2 -20   2  248.18   20.00 
  -2 -20   2  225.08   16.00 
   2 -20  -2  260.87   21.50 
  -2 -20   2  223.98   16.10 
  -2 -20   2  231.98   24.80 
  -2  20   1  168.68   13.30 
   2  20  -1  183.48   25.40 
  -2  20   1  185.28   11.30 
  -2  20   1  171.78   23.10 
   2 -20  -1  182.28   17.50 
  -2 -20   1  183.68   15.90 
  -2 -20   1  146.99   14.80 
   2 -20  -1  164.08   20.20 
  -2 -20   1  171.18   15.20 
   2 -20  -1  189.58   19.00 
   2  20   0  139.09   22.80 
  -2  20   0  115.99    9.70 
  -2  20   0  114.49   10.70 
  -2  20   0   88.49   18.50 
   2 -20   0  127.39   14.90 
   2 -20   0   77.29   10.80 
   2 -20   0  115.19   14.90 
  -2 -20   0  108.59   11.60 
  -2 -20   0   68.39   13.40 
  -2 -20   0  111.29   13.50 
  -2 -20   0  100.09   12.70 
  -2  20  -1   12.40    7.80 
  -2  20  -1   32.20   15.90 
   2  20   1   36.40   17.00 
   2 -20   1    7.60    6.80 
  -2 -20  -1   27.70    9.50 
  -2 -20  -1   20.80   11.40 
   2 -20   1    8.50    9.10 
  -2 -20  -1   29.90   10.50 
  -2 -20  -1   18.90    9.40 
   2 -20   1   15.80    9.90 
   2  20   2  358.06   30.70 
  -2  20  -2  337.67   30.30 
  -2  20  -2  300.27   18.90 
   2  20   2  324.17   13.30 
   2 -20   2  302.67   21.00 
  -2 -20  -2  335.87   22.20 
   2 -20   2  325.07   20.70 
  -2 -20  -2  320.57   32.20 
  -2 -20  -2  356.46   22.30 
  -2 -20  -2  330.97   22.30 
   2 -20   2  315.27   20.60 
  -2  20  -3  183.18   25.90 
  -2  20  -3  188.78   15.80 
   2  20   3  173.28   12.50 
   2  20   3  206.28   27.10 
  -2 -20  -3  196.18   17.60 
   2 -20   3  183.28   15.80 
   2 -20   3  148.19   18.40 
  -2 -20  -3  174.38   18.50 
   2 -20   3  198.78   17.50 
  -2 -20  -3  132.49   19.40 
  -2  20  -4   12.60    9.30 
   2  20   4   25.80    8.50 
   2  20   4   19.30   17.30 
  -2  20  -4   35.80   17.70 
   2 -20   4   12.20    9.20 
  -2 -20  -4    9.70   13.30 
  -2 -20  -4   25.40   12.40 
  -2 -20  -4   19.00   11.60 
   2  20   5   74.69   11.80 
  -2  20  -5   89.49   21.90 
   2  20   5   90.49   21.40 
  -2  20  -5   89.69   15.00 
  -2 -20  -5   43.90   14.80 
  -2 -20  -5   86.89   15.10 
  -2 -20  -5   85.09   15.70 
   2 -20   5  104.89   12.90 
   2  20   6  134.99   24.40 
  -2  20  -6  142.99   17.10 
   2  20   6  116.59   15.00 
  -2 -20  -6  122.39   17.50 
   2 -20   6  103.89   13.50 
  -2 -20  -6  136.69   18.20 
  -2 -20  -6   92.89   19.40 
   2  20   7   22.70   17.80 
   2  20   7   21.60   11.30 
  -2  20  -7   34.30   12.80 
   2 -20   7   21.40    9.50 
  -2 -20  -7    7.70   13.30 
  -2 -20  -7   25.50   12.50 
  -2 -20  -7   28.20   14.20 
   2  20   8   42.80   13.90 
  -2  20  -8   39.50   13.10 
   2  20   8   56.79   18.00 
   2 -20   8   32.30    9.70 
  -2 -20  -8   37.60   13.70 
  -2 -20  -8   40.80   14.50 
  -2 -20  -8   21.30   15.10 
   2  20   9   24.50   19.30 
   2  20   9   43.70   14.40 
  -2  20  -9   59.19   15.90 
  -2 -20  -9   30.70   14.40 
  -2 -20  -9   28.20   14.10 
  -2 -20  -9   17.90   15.30 
   2 -20   9   40.80   10.30 
   2  20  10   37.60   21.20 
   2  20  10   32.80   15.20 
  -2  20 -10   21.70   13.50 
   2 -20  10   32.80   10.50 
  -2 -20 -10   42.80   16.50 
  -2 -20 -10   59.99   17.50 
  -2 -20 -10   44.80   16.00 
   2  20  11   38.70   13.30 
   2  20  11   16.40   21.30 
   2  20  11    1.50   12.40 
  -2  20 -11   40.20   15.50 
   2 -20  11   32.70   10.60 
  -2 -20 -11   31.30   16.00 
  -2 -20 -11   17.80   14.60 
  -2 -20 -11   24.90   15.70 
   2  20  12   30.80   14.90 
  -2  20 -12   18.40   14.50 
   2  20  12   10.00   21.60 
  -2 -20 -12   21.80   15.70 
   2 -20  12   26.90   10.50 
  -2 -20 -12    8.50   14.50 
  -2 -20 -12   28.40   16.00 
  -2  20 -13   23.60   15.40 
   2  20  13   29.50   24.20 
   2  20  13   28.10   16.00 
   2 -20  13   15.10   10.50 
  -2 -20 -13   13.80   15.70 
  -2 -20 -13   15.10   15.00 
   2  20  14   27.20   24.70 
  -2  20 -14   25.40   16.80 
   2  20  14   16.30   18.20 
  -2 -20 -14    0.00   15.30 
   2 -20  14    8.40   15.80 
   2 -20  14    9.10   10.90 
  -2  22  13    3.90   12.90 
  -2  22  13    5.20   20.40 
  -2  22  13   19.20   17.60 
   2  22 -13   12.10   15.10 
  -2 -22  13    8.10    6.80 
  -2 -22  13    0.30   14.00 
  -2  22  12   39.20   16.30 
  -2  22  12   52.19   18.90 
  -2  22  12   40.60   22.20 
   2  22 -12   50.69   16.80 
   2 -22 -12   52.09   18.50 
  -2 -22  12   30.80   16.40 
  -2 -22  12   32.90    7.60 
  -2  22  11   31.00   15.30 
   2  22 -11   20.00   14.10 
  -2  22  11    4.10   17.90 
  -2  22  11   11.50   13.40 
   2 -22 -11   14.10   11.80 
   2 -22 -11   15.60   15.50 
  -2 -22  11    0.70    6.00 
  -2  22  10   72.99   23.30 
  -2  22  10   94.09   19.60 
   2  22 -10  120.39   19.50 
   2 -22 -10   96.89   19.90 
   2 -22 -10   72.59   16.60 
  -2 -22  10   84.69    9.40 
  -2  22   9    4.60   17.30 
  -2  22   9    6.80   13.10 
   2  22  -9  -11.00   11.10 
  -2 -22   9    3.10    5.80 
   2 -22  -9   -5.80   12.70 
   2 -22  -9   11.70   11.70 
  -2  22   8  134.09   19.20 
  -2  22   8  118.49   24.90 
   2  22  -8  141.69   19.00 
   2 -22  -8  113.19   20.30 
  -2 -22   8  120.89   10.60 
   2 -22  -8  106.19   18.40 
  -2 -22   8  127.19   10.70 
  -2  22   7   23.00   12.60 
  -2  22   7   31.10   18.80 
   2  22  -7   22.30   12.90 
   2 -22  -7   31.70   14.50 
  -2 -22   7   22.50    6.80 
  -2 -22   7   12.40    6.30 
   2 -22  -7   31.60   12.50 
  -2  22   6  216.58   29.00 
  -2  22   6  192.38   19.70 
   2  22  -6  181.18   28.50 
   2  22  -6  191.78   20.60 
  -2 -22   6  175.78   13.40 
   2 -22  -6  256.87   28.40 
  -2 -22   6  167.28   13.10 
   2 -22  -6  230.48   24.10 
   2  22  -5   53.39   20.30 
  -2  22   5   26.30   11.10 
  -2  22   5   38.60   18.80 
   2  22  -5   26.60   11.10 
   2 -22  -5   45.70   15.50 
  -2 -22   5   20.00    9.60 
  -2 -22   5   37.80    8.30 
  -2 -22   5   20.90    7.70 
   2 -22  -5   22.70   10.80 
  -2  22   4  264.17   29.50 
   2  22  -4  238.88   30.70 
   2  22  -4  243.28   19.50 
  -2  22   4  254.87   19.10 
  -2 -22   4  265.87   16.80 
   2 -22  -4  270.27   23.20 
  -2 -22   4  268.07   24.60 
  -2 -22   4  263.07   17.00 
  -2 -22   4  276.97   26.70 
   2 -22  -4  296.77   27.30 
   2  22  -3   -7.80   15.10 
  -2  22   3   25.70   17.20 
  -2  22   3   12.60    8.40 
  -2 -22   3    4.80    7.50 
   2 -22  -3  -18.10    9.20 
   2 -22  -3    9.70    8.50 
  -2 -22   3    2.60    7.50 
  -2 -22   3  -18.50    7.50 
  -2  22   2  349.77   19.00 
  -2  22   2  300.27   30.20 
   2  22  -2  268.17   27.20 
   2 -22  -2  340.27   24.10 
   2 -22  -2  326.57   26.80 
  -2 -22   2  306.37   28.80 
  -2 -22   2  350.36   20.50 
  -2 -22   2  327.07   20.10 
   2  22  -1   17.40   16.40 
  -2  22   1   10.50    7.90 
  -2  22   1    4.00   16.00 
   2 -22  -1   11.00   11.00 
  -2 -22   1   20.60    8.90 
   2 -22  -1    3.70    8.80 
  -2 -22   1   -4.20    9.00 
  -2 -22   1   12.50    8.80 
   2  22   0  156.38   25.90 
  -2  22   0  193.88   19.50 
  -2  22   0  169.48   26.40 
  -2 -22   0  107.49   16.80 
   2 -22   0  193.78   19.20 
  -2 -22   0  177.78   17.10 
   2  22   1   31.10   17.50 
  -2  22  -1   25.20   17.50 
  -2  22  -1   33.00    8.50 
   2 -22   1   21.80   11.20 
  -2 -22  -1    7.80   11.80 
  -2 -22  -1   12.00   10.20 
  -2  22  -2   86.49   11.90 
   2  22   2   90.19   19.80 
  -2  22  -2  113.39   21.40 
  -2 -22  -2   71.79   15.90 
   2 -22   2  103.69   14.50 
  -2 -22  -2  106.19   16.00 
  -2  22  -3   15.00   16.50 
  -2  22  -3    3.40    8.50 
   2  22   3    2.80   16.00 
  -2 -22  -3  -10.70   11.50 
   2 -22   3   -9.20    8.80 
  -2 -22  -3    2.90   10.90 
   2  22   4   69.19   21.30 
  -2  22  -4   72.79   13.40 
  -2  22  -4   48.10   19.80 
  -2 -22  -4   39.30   13.00 
   2 -22   4   66.39   12.10 
  -2 -22  -4   39.80   15.60 
   2  22   5    8.60    8.30 
   2  22   5   39.50   18.30 
  -2  22  -5  -10.40   15.70 
  -2  22  -5   -2.80   10.20 
  -2 -22  -5    3.30   10.30 
   2 -22   5   16.60    9.30 
  -2 -22  -5    4.10   11.70 
  -2 -22  -5  -18.40   12.50 
   2  22   6   97.29   24.50 
   2  22   6   69.99   12.50 
  -2  22  -6  101.09   15.50 
  -2 -22  -6   91.29   16.60 
  -2 -22  -6   84.89   16.20 
  -2 -22  -6   66.79   17.60 
   2 -22   6   90.79   13.00 
   2  22   7    1.80   17.60 
   2  22   7   14.50   10.60 
  -2  22  -7    7.80   11.00 
  -2 -22  -7   -3.40   11.30 
  -2 -22  -7    8.10   11.80 
   2 -22   7   -1.80    8.50 
  -2 -22  -7   -1.80   13.30 
  -2  22  -8  133.39   18.50 
   2  22   8  139.59   26.80 
   2  22   8  109.19   16.70 
  -2 -22  -8   57.59   18.10 
  -2 -22  -8   96.89   18.20 
  -2 -22  -8  106.19   18.70 
   2 -22   8  115.29   13.70 
   2  22   9   15.50   11.90 
  -2  22  -9    0.10   11.70 
   2  22   9   -4.00   18.70 
  -2 -22  -9   16.70   13.20 
   2 -22   9   10.30    9.30 
  -2 -22  -9    5.20   14.40 
  -2 -22  -9   19.80   15.40 
   2  22  10   85.79   17.20 
   2  22  10   95.09   25.50 
  -2  22 -10  116.89   19.10 
  -2 -22 -10   92.99   19.40 
   2 -22  10   86.79   13.20 
  -2 -22 -10   80.69   19.80 
  -2  22 -11   -8.20   11.90 
   2  22  11    8.30   14.70 
   2  22  11    0.70   19.80 
   2 -22  11    5.80    9.00 
  -2 -22 -11  -10.00   13.40 
  -2 -22 -11   -1.60   15.50 
  -2  22 -12   67.49   17.70 
   2  22  12   50.89   25.40 
   2  22  12   36.70   16.70 
   2 -22  12   25.30   11.10 
  -2 -22 -12   29.50   17.40 
  -2 -22 -12   59.09   20.30 
  -2  22 -13   24.20   15.90 
   2  22  13   -0.40   15.50 
   2  22  13    3.30   22.50 
  -2 -22 -13   12.90   15.00 
  -2 -22 -13    0.70   15.30 
   2 -22  13   -7.10   11.30 
  -2  24  11   38.50   22.20 
   2  24 -11  101.29   20.50 
  -2  24  11   37.40   17.10 
   2 -24 -11   61.19   15.50 
   2 -24 -11   49.90   19.30 
  -2 -24  11   49.80    7.90 
   2  24 -10   20.20   14.10 
  -2  24  10   16.30   19.90 
  -2  24  10   12.70   14.70 
   2 -24 -10    4.60   15.50 
  -2 -24  10   17.30    5.80 
   2 -24 -10   26.10   11.80 
  -2 -24  10   22.50    6.70 
  -2  24   9   60.79   16.70 
   2  24  -9   83.39   18.20 
  -2  24   9   72.99   24.00 
   2 -24  -9   96.19   21.80 
  -2 -24   9   77.49    8.90 
   2 -24  -9   84.09   17.00 
  -2 -24   9   69.99    8.70 
  -2  24   8   12.60   20.20 
   2  24  -8   66.19   15.60 
  -2  24   8   25.70   13.50 
   2 -24  -8   38.80   13.90 
   2 -24  -8   23.80   15.40 
  -2 -24   8   19.00    6.80 
  -2 -24   8   28.80    7.10 
  -2  24   7  117.99   17.70 
   2  24  -7  146.49   19.20 
  -2  24   7  169.38   29.20 
  -2 -24   7  130.89   11.80 
   2 -24  -7  111.19   20.90 
   2 -24  -7  120.19   20.60 
  -2 -24   7  139.89   12.10 
   2  24  -6   60.59   14.30 
  -2  24   6   48.80   13.40 
   2  24  -6   50.39   21.30 
  -2  24   6   38.70   19.10 
  -2 -24   6   32.10    8.10 
   2 -24  -6   40.80   15.20 
  -2 -24   6   38.20    8.50 
   2  24  -5  171.28   28.80 
  -2  24   5  165.28   27.20 
   2  24  -5  142.29   18.00 
  -2  24   5  113.19   15.40 
   2 -24  -5  134.19   21.10 
  -2 -24   5  118.59   12.50 
  -2 -24   5  145.29   13.70 
   2  24  -4   75.19   22.60 
  -2  24   4   57.19   20.00 
   2 -24  -4   34.60   13.80 
  -2 -24   4   57.09   10.40 
  -2  24   3  159.78   27.00 
   2  24  -3  149.99   27.50 
  -2 -24   3  132.99   14.40 
   2 -24  -3  143.49   19.50 
   2  24  -2   69.49   22.30 
  -2  24   2   44.70   19.60 
  -2 -24   2   54.39   11.30 
   2 -24  -2   36.10   14.00 
   2  24  -1  174.78   29.40 
  -2  24   1  158.38   26.80 
  -2 -24   1   70.09   20.90 
   2 -24  -1  155.48   19.50 
  -2 -24   1  139.49   15.80 
   2  24   0   30.40   16.40 
  -2  24   0   40.60   20.10 
  -2 -24   0   47.40   12.20 
  -2 -24   0    4.20   11.90 
   2 -24   0   32.40   12.90 
  -2  24  -1  119.09   25.40 
   2  24   1  158.48   27.30 
  -2 -24  -1  121.49   16.50 
   2 -24   1  103.99   16.40 
   2  24   2   44.60   19.20 
  -2  24  -2   41.50   19.70 
  -2 -24  -2   19.30   12.10 
   2 -24   2   38.90   12.00 
  -2 -24  -2   -5.90   12.80 
   2  24   3  101.19   24.70 
  -2  24  -3  106.59   24.50 
  -2  24  -3   86.59   15.90 
  -2 -24  -3   93.79   16.60 
  -2 -24  -3   51.99   16.60 
   2 -24   3  113.69   15.80 
   2  24   4   56.79   22.20 
  -2  24  -4   56.29   21.50 
  -2  24  -4   60.49   12.80 
   2 -24   4   37.10   11.40 
  -2 -24  -4   41.10   13.70 
  -2 -24  -4   11.50   14.90 
  -2  24  -5   84.79   14.60 
  -2  24  -5  111.59   25.10 
   2  24   5  129.49   26.40 
  -2 -24  -5   23.00   16.60 
  -2 -24  -5   72.09   17.10 
   2 -24   5   89.89   13.90 
   2  24   6    0.00   18.80 
  -2  24  -6   17.40   12.20 
  -2 -24  -6   12.20   13.60 
  -2 -24  -6    3.30   15.10 
   2 -24   6   16.60   10.50 
   2  24   7   56.99   24.20 
  -2  24  -7   69.29   16.00 
   2 -24   7   57.69   12.10 
  -2 -24  -7   41.10   17.90 
  -2 -24  -7   54.99   16.50 
   2  24   8    3.90   17.90 
  -2  24  -8   33.90   14.80 
   2 -24   8   10.70    9.50 
  -2 -24  -8  -13.30   14.00 
  -2 -24  -8   -3.20   14.70 
   2  24   9   39.20   14.30 
  -2  24  -9   39.90   15.80 
   2  24   9   55.89   24.20 
   2 -24   9   27.60   10.40 
  -2 -24  -9   35.80   16.80 
  -2 -24  -9   21.20   16.10 
  -2  24 -10   38.80   16.90 
   2  24  10   29.80   14.50 
   2  24  10   19.90   20.60 
   2 -24  10   12.80    9.70 
  -2 -24 -10   15.90   15.30 
  -2 -24 -10    5.70   15.20 
   2  24  11   24.70   14.60 
  -2  24 -11   15.60   15.70 
   2  24  11   63.39   24.90 
  -2 -24 -11   21.70   16.50 
  -2 -24 -11   26.30   17.60 
   2 -24  11   29.00   11.10 
  -2  26   9   79.59   25.60 
   2  26  -9   70.29   18.10 
  -2 -26   9   54.19    8.10 
   2 -26  -9   41.00   17.70 
   2  26  -8   21.60   14.60 
  -2  26   8   28.50   20.00 
  -2 -26   8   16.20    7.00 
   2 -26  -8   20.10   17.60 
  -2  26   7  158.18   29.40 
   2  26  -7  143.79   20.70 
   2 -26  -7  108.69   21.90 
  -2 -26   7  121.79   12.10 
  -2  26   6    3.50   19.60 
   2  26  -6    2.50   19.50 
   2 -26  -6    9.50   15.80 
  -2 -26   6    3.10    7.10 
  -2  26   5  100.89   25.50 
   2  26  -5  125.79   28.10 
  -2 -26   5   78.49   11.20 
   2 -26  -5   79.09   18.80 
   2  26  -4   47.40   22.70 
  -2  26   4   18.40   19.00 
   2 -26  -4   20.20   15.20 
  -2 -26   4   18.00    9.20 
  -2  26   3  150.68   28.10 
   2  26  -3  160.38   29.40 
   2 -26  -3  162.28   21.60 
  -2 -26   3  151.38   15.60 
  -2  26   2   41.00   21.30 
   2  26  -2   26.00   21.20 
   2 -26  -2   40.10   14.90 
  -2 -26   2   39.60   11.30 
  -2  26   1  112.19   25.60 
   2  26  -1  117.69   26.10 
  -2 -26   1   94.99   14.90 
   2 -26  -1  157.58   20.30 
  -2  26   0   66.89   22.80 
   2  26   0   43.20   22.00 
   2 -26   0   74.59   16.30 
  -2 -26   0   46.90   13.20 
  -2  26  -1   56.89   22.90 
   2  26   1   73.19   23.00 
  -2 -26  -1   79.49   14.90 
   2 -26   1   73.09   14.80 
   2  26   2   19.30   18.20 
  -2  26  -2   12.90   19.00 
   2 -26   2   -0.90   10.60 
  -2 -26  -2    1.80   11.10 
  -2  26  -3  107.99   26.10 
   2  26   3  137.49   28.80 
  -2 -26  -3  117.19   18.40 
   2 -26   3  123.89   17.00 
  -2  26  -4    1.90   18.70 
   2  26   4    4.10   19.40 
   2 -26   4    4.60   10.20 
  -2 -26  -4    8.80   12.10 
   2  26   5  100.79   26.50 
  -2  26  -5   80.99   24.70 
  -2 -26  -5   90.79   18.10 
   2 -26   5   67.29   13.70 
  -2 -26  -5   58.09   26.90 
   2  26   6   34.10   20.40 
   2 -26   6    1.70   10.10 
  -2 -26  -6  -10.40   14.10 
  -2 -26  -6   -2.80   14.30 
   2  26   7   48.10   23.00 
  -2  26  -7   53.39   16.30 
   2 -26   7   49.20   12.30 
  -2 -26  -7   23.70   16.00 
  -2 -26  -7   47.50   17.50 
   2  26   8   31.10   22.80 
  -2  26  -8   17.70   14.00 
  -2 -26  -8   16.20   16.40 
   2 -26   8   21.20   10.10 
  -2 -26  -8    5.20   14.10 
  -2  28   5  -14.50   19.20 
   2  28  -5   17.10   26.30 
  -2 -28   5    8.70    8.10 
   2 -28  -5    9.60   14.70 
  -2  28   4   37.30   22.80 
   2  28  -4   60.79   24.30 
  -2 -28   4   43.00   10.40 
   2 -28  -4   30.70   16.70 
  -2  28   3   33.10   21.70 
   2  28  -3    4.00   19.50 
   2 -28  -3   16.00   14.90 
  -2 -28   3  -10.00    8.60 
   2  28  -2   69.99   25.60 
  -2  28   2  112.79   27.40 
   2 -28  -2   53.49   17.10 
  -2 -28   2   55.79   12.40 
  -2  28   1   17.50   20.30 
   2  28  -1   21.00   21.70 
  -2 -28   1    9.20   10.60 
   2 -28  -1   -0.30   12.70 
   2  28   0  121.39   28.10 
  -2  28   0  135.69   29.20 
   2 -28   0  122.49   19.40 
  -2 -28   0  112.79   17.20 
   2  28   1    7.00   19.30 
  -2  28  -1   10.20   20.80 
   2 -28   1   22.90   13.30 
  -2 -28  -1   14.70   12.40 
  -2  28  -2   72.89   24.40 
   2  28   2   36.70   22.40 
  -2 -28  -2   57.69   15.70 
   2 -28   2   37.30   14.10 
  -2  28  -3   88.79   26.00 
   2  28   3   59.99   23.10 
   2 -28   3   65.49   14.90 
  -2 -28  -3   77.19   16.90 
  -2  28  -4   59.79   25.00 
   2  28   4   94.09   26.20 
   2 -28   4   78.59   15.20 
  -2 -28  -4   71.29   17.10 
  -2  28  -5   11.60   21.30 
  -2 -28  -5    0.70   14.20 
  -3   1  20   31.80   15.60 
   3   1 -20   10.90   13.40 
  -3   1  20   -8.70   17.80 
  -3  -1  20   -5.10   17.60 
   3  -1 -20   12.20   15.00 
  -3  -1  20    2.50   15.20 
  -3   1  19   33.20   19.00 
   3   1 -19   39.00   15.90 
  -3   1  19   37.80   17.70 
   3  -1 -19   61.79   17.00 
  -3  -1  19   26.10   15.70 
  -3  -1  19   44.30   20.20 
  -3   1  18    3.30   14.60 
  -3   1  18    1.00   15.20 
   3   1 -18   31.90   15.00 
   3  -1 -18   -0.10   13.00 
  -3  -1  18   -0.10   15.00 
  -3  -1  18   22.20   14.40 
  -3   1  17   74.89   17.10 
  -3   1  17   67.09   20.50 
   3   1 -17   85.29   17.00 
  -3  -1  17   59.99   18.70 
  -3  -1  17   99.69   17.60 
   3  -1 -17  118.39   18.10 
   3   1 -16   25.40   12.90 
  -3   1  16   -6.90   13.60 
  -3   1  16   32.10   13.60 
   3  -1 -16   29.00   12.60 
  -3  -1  16   12.70   12.30 
  -3  -1  16   11.70   14.70 
  -3   1  15   73.49   18.50 
  -3   1  15  116.09   18.50 
   3   1 -15  150.28   18.70 
   3  -1 -15  140.49   18.50 
  -3  -1  15   84.79   18.70 
  -3  -1  15  118.29   18.00 
  -3   1  14   81.09   15.00 
  -3   1  14   48.60   15.50 
   3   1 -14   97.09   15.40 
   3  -1 -14   96.59   14.90 
  -3  -1  14   60.49   14.60 
  -3  -1  14   76.39   14.20 
  -3   1  13  211.28   20.60 
   3   1 -13  184.08   19.10 
  -3   1  13  137.19   19.80 
   3   1 -13  207.98   16.00 
   3  -1 -13  173.98   17.20 
   3  -1 -13  202.58   18.60 
  -3  -1  13  129.09   19.40 
  -3  -1  13  212.18   18.20 
  -3   1  12   58.29   12.20 
   3   1 -12   56.69   12.40 
  -3   1  12   49.99   13.60 
   3   1 -12   61.29   10.80 
  -3  -1  12   36.90   12.90 
   3  -1 -12   60.89   11.80 
  -3  -1  12   33.20   10.40 
   3  -1 -12   43.80    9.90 
   3   1 -11  455.85   22.40 
  -3   1  11  378.96   23.20 
  -3   1  11  403.86   31.50 
   3   1 -11  397.56   23.10 
   3  -1 -11  372.36   22.00 
  -3  -1  11  377.66   23.20 
  -3  -1  11  434.06   31.80 
   3  -1 -11  409.06   22.30 
  -3   1  10  119.09   13.20 
  -3   1  10   70.89   13.20 
   3   1 -10  121.59   14.00 
   3   1 -10  125.19   12.30 
  -3  -1  10   96.69   11.90 
  -3  -1  10   91.19   14.20 
   3  -1 -10  121.69   13.20 
   3  -1 -10   99.09   11.80 
   3   1  -9  499.65   25.40 
   3   1  -9  555.04   24.60 
  -3   1   9  565.14   26.80 
  -3   1   9  564.74   33.20 
   3  -1  -9  485.85   24.60 
   3  -1  -9  581.74   25.80 
  -3  -1   9  523.85   32.70 
  -3  -1   9  529.65   25.60 
  -3   1   8   84.29   12.70 
  -3   1   8  123.89   10.70 
  -3   1   8  119.89   11.40 
  -3   1   8   96.09   11.50 
   3   1  -8   95.39   10.00 
   3   1  -8  133.29   13.00 
   3  -1  -8  120.09   11.70 
  -3  -1   8  121.79   11.80 
  -3  -1   8   81.59   12.10 
   3  -1  -8  127.49   11.30 
  -3  -1   8  127.19   12.30 
  -3  -1   8  125.79   11.40 
   3  -1  -8  116.89   13.20 
   3   1  -7 1508.95   52.59 
  -3   1   7 1483.75   60.19 
  -3   1   7 1448.85   53.99 
   3   1  -7 1418.06   53.49 
  -3   1   7 1466.95   52.89 
  -3   1   7 1536.55   54.09 
   3   1  -7 1376.26   52.19 
  -3  -1   7 1473.95   53.59 
  -3  -1   7 1400.76   52.99 
   3  -1  -7 1437.66   52.99 
  -3  -1   7 1536.55   60.79 
   3  -1  -7 1503.15   59.49 
   3  -1  -7 1514.75   53.69 
   3  -1  -7 1363.66   53.09 
  -3  -1   7 1505.65   52.99 
   3   1  -6  584.64   25.00 
  -3   1   6  607.54   26.10 
   3   1  -6  599.84   26.40 
  -3   1   6  619.94   26.90 
   3   1  -6  635.54   25.30 
  -3   1   6  651.43   32.30 
  -3  -1   6  629.74   26.00 
  -3  -1   6  673.53   31.90 
   3  -1  -6  638.54   26.40 
   3  -1  -6  741.93   27.00 
   3  -1  -6  625.24   25.90 
  -3  -1   6  638.04   25.50 
   3   1  -5 3502.35  116.19 
  -3   1   5 3618.74  116.29 
  -3   1   5 3543.55  115.49 
  -3   1   5 3663.13  121.59 
   3   1  -5 3134.79  114.49 
   3   1  -5 3506.25  114.89 
   3  -1  -5 3528.75  115.59 
  -3  -1   5 3432.26  120.79 
  -3  -1   5 3370.86  115.09 
   3  -1  -5 3396.16  115.69 
   3  -1  -5 3362.56  115.79 
  -3   1   4    9.70    5.30 
  -3   1   4   20.80    6.00 
   3   1  -4    8.50    4.50 
  -3   1   4   19.80    5.70 
  -3   1   4   26.30    6.00 
   3   1  -4   25.50    6.80 
  -3   1   4   19.80    5.90 
   3   1  -4    7.70    3.30 
   3   1  -4   11.80    5.40 
   3  -1  -4   18.30    5.70 
  -3  -1   4   24.60    6.10 
  -3  -1   4   10.60    6.20 
  -3  -1   4   12.70    5.00 
   3  -1  -4   21.60    5.50 
  -3  -1   4   13.80    4.70 
  -3   1   3 1342.97   53.19 
  -3   1   3 1440.16   49.20 
  -3   1   3 1415.16   49.20 
   3   1  -3 1473.75   52.29 
  -3   1   3 1478.35   53.09 
   3   1  -3 1366.66   47.90 
  -3   1   3 1398.86   48.70 
  -3  -1   3 1409.16   48.20 
  -3  -1   3 1448.76   52.49 
  -3  -1   3 1296.57   47.90 
   3  -1  -3 1423.56   49.00 
  -3  -1   3 1432.06   49.00 
   3  -1  -3 1383.66   49.00 
   3  -1  -3 1374.76   52.29 
  -3  -1   3 1489.05   54.59 
  -3   1   2   22.00    5.30 
   3   1  -2   36.90    5.50 
  -3   1   2   35.00    6.70 
   3   1  -2   38.20    4.90 
  -3   1   2   38.60    5.80 
  -3   1   2   45.00    6.10 
  -3  -1   2   41.20    6.20 
  -3  -1   2   26.70    5.60 
   3  -1  -2   46.60    5.60 
   3  -1  -2   24.40    5.00 
   3  -1  -2   31.60    6.10 
   3  -1  -2   40.70    5.90 
  -3  -1   2   46.30    5.10 
  -3  -1   2   40.90    4.80 
   3  -1  -2   39.10    6.00 
   3   1  -1  143.59    8.20 
  -3   1   1  178.58   13.10 
  -3   1   1  149.88    9.10 
   3   1  -1  147.89   11.90 
   3   1  -1  135.79    6.90 
   3   1  -1  150.48   10.10 
  -3   1   1  154.78    6.00 
   3   1  -1  150.28    7.80 
  -3   1   1  165.98   13.00 
  -3   1   1  152.48    9.10 
   3  -1  -1  161.48    9.00 
   3  -1  -1  160.58   12.30 
  -3  -1   1  135.29    6.80 
  -3  -1   1  156.28   12.80 
   3  -1  -1  180.08   12.10 
   3  -1  -1  150.68    9.10 
  -3  -1   1  157.78    8.00 
  -3  -1   1  141.89   10.20 
  -3  -1   1  138.59    8.10 
   3   1   0  310.17   12.70 
   3   1   0  299.87   15.40 
  -3   1   0  281.17   13.10 
  -3   1   0  294.57   17.20 
  -3   1   0  295.67   14.00 
  -3   1   0  277.67   14.40 
   3   1   0  286.17   16.40 
   3   1   0  291.57   12.20 
   3   1   0  308.17   12.50 
  -3   1   0  284.97   13.10 
   3  -1   0  283.47   13.00 
   3  -1   0  296.67   14.80 
   3  -1   0  270.37   13.10 
  -3  -1   0  298.97   12.40 
  -3  -1   0  279.57   12.40 
  -3  -1   0  296.87   14.90 
  -3  -1   0  309.67   12.70 
  -3  -1   0  302.87   16.70 
   3   1   1 1154.28   41.40 
   3   1   1 1209.38   42.50 
  -3   1  -1 1240.18   42.80 
   3   1   1 1260.77   46.50 
  -3   1  -1 1160.88   42.60 
   3   1   1 1201.78   44.80 
  -3   1  -1 1319.17   47.70 
  -3   1  -1 1297.47   44.00 
   3   1   1 1235.18   42.40 
  -3  -1  -1 1215.38   45.40 
  -3  -1  -1 1274.17   46.70 
  -3  -1  -1 1189.48   42.50 
   3  -1   1 1197.48   42.80 
   3  -1   1 1232.78   42.60 
   3  -1   1 1248.58   43.70 
  -3  -1  -1 1233.38   42.50 
   3   1   2   66.99    6.80 
  -3   1  -2   75.89    7.60 
  -3   1  -2   44.40    7.80 
   3   1   2   73.29    7.50 
   3   1   2   58.29    7.10 
  -3   1  -2   87.19   11.00 
   3   1   2   49.50    6.90 
  -3   1  -2   80.49    7.60 
  -3  -1  -2  103.89   13.70 
   3  -1   2   51.59    6.30 
  -3  -1  -2   78.69    7.60 
  -3  -1  -2   75.09    7.70 
  -3  -1  -2   44.80    7.10 
   3  -1   2   76.79    7.60 
  -3   1  -3  743.83   29.20 
   3   1   3  799.12   30.00 
   3   1   3  789.22   29.60 
  -3   1  -3  776.92   35.20 
  -3   1  -3  789.02   32.40 
  -3   1  -3  800.32   29.60 
   3   1   3  805.52   33.60 
   3   1   3  723.73   34.10 
   3  -1   3  750.82   29.50 
   3  -1   3  753.62   31.60 
  -3  -1  -3  763.82   29.50 
   3  -1   3  683.23   34.00 
  -3  -1  -3  777.32   34.40 
  -3  -1  -3  792.22   29.80 
  -3  -1  -3  809.22   34.30 
  -3   1  -4  239.18   13.60 
  -3   1  -4  257.07   18.80 
   3   1   4  264.07   19.10 
  -3   1  -4  234.08   13.80 
   3   1   4  246.78   13.60 
   3   1   4  242.78   14.40 
   3   1   4  251.27   18.40 
  -3  -1  -4  252.57   14.40 
  -3  -1  -4  240.68   14.10 
   3  -1   4  212.48   17.30 
  -3  -1  -4  281.37   19.70 
  -3  -1  -4  220.38   19.10 
   3  -1   4  225.08   16.70 
   3  -1   4  237.08   14.10 
   3  -1   4  240.98   13.50 
   3   1   5  377.86   24.00 
  -3   1  -5  391.16   19.00 
   3   1   5  412.06   20.00 
  -3   1  -5  410.56   18.80 
  -3   1  -5  394.56   23.60 
   3   1   5  355.26   19.20 
   3   1   5  383.66   23.60 
  -3  -1  -5  402.36   19.20 
   3  -1   5  402.66   19.40 
   3  -1   5  394.16   23.90 
  -3  -1  -5  365.86   18.40 
  -3  -1  -5  375.66   24.70 
   3  -1   5  417.86   19.10 
  -3   1  -6   88.09   10.40 
  -3   1  -6   88.59    9.70 
  -3   1  -6   64.89    9.40 
   3   1   6   48.70    7.40 
   3   1   6   71.69   10.20 
   3   1   6   51.09    8.50 
   3   1   6   65.89    9.30 
  -3   1  -6   45.20    9.00 
  -3  -1  -6   85.19   10.00 
   3  -1   6   55.29    9.10 
   3  -1   6   57.79    9.20 
   3  -1   6   70.09    9.20 
  -3  -1  -6   91.19   10.50 
  -3  -1  -6   90.59    9.50 
   3  -1   6   35.10    8.30 
  -3  -1  -6   46.10    9.90 
  -3   1  -7  794.02   32.60 
   3   1   7  754.02   33.50 
   3   1   7  767.62   35.70 
   3   1   7  784.22   40.10 
  -3   1  -7  836.32   40.00 
   3   1   7  773.92   39.90 
  -3   1  -7  760.22   32.60 
  -3   1  -7  787.62   33.00 
   3  -1   7  811.92   33.60 
   3  -1   7  790.22   39.00 
   3  -1   7  803.72   36.40 
   3  -1   7  741.83   40.80 
   3  -1   7  814.42   33.10 
  -3  -1  -7  796.92   39.70 
  -3  -1  -7  813.02   32.80 
  -3  -1  -7  801.42   33.30 
  -3  -1  -7  777.32   33.30 
  -3   1  -8  315.67   19.50 
   3   1   8  355.86   31.50 
   3   1   8  378.76   24.30 
  -3   1  -8  333.17   20.40 
  -3   1  -8  357.16   26.50 
   3   1   8  403.56   21.60 
  -3   1  -8  327.97   19.20 
  -3  -1  -8  345.07   25.60 
  -3  -1  -8  388.56   21.00 
  -3  -1  -8  370.66   20.30 
   3  -1   8  322.57   23.00 
   3  -1   8  353.16   20.70 
  -3  -1  -8  336.97   19.10 
   3  -1   8  330.77   26.10 
   3   1   9  169.88   18.50 
  -3   1  -9  199.68   22.70 
  -3   1  -9  215.28   16.70 
   3   1   9  182.38   16.70 
  -3   1  -9  177.28   15.50 
  -3  -1  -9  196.98   18.70 
  -3  -1  -9  216.58   24.00 
  -3  -1  -9  203.98   16.50 
   3  -1   9  217.98   16.80 
  -3  -1  -9  198.48   15.10 
   3  -1   9  213.78   19.90 
  -3   1 -10  152.68   15.60 
   3   1  10   90.59   13.10 
  -3   1 -10  142.99   15.10 
   3   1  10  149.29   16.00 
  -3   1 -10   89.39   14.30 
  -3  -1 -10  168.88   14.30 
   3  -1  10  141.49   15.40 
  -3  -1 -10  184.58   15.70 
   3  -1  10   88.19   13.00 
  -3  -1 -10  178.88   23.40 
  -3   1 -11  150.48   15.20 
  -3   1 -11  163.98   16.90 
  -3   1 -11  105.99   15.80 
   3   1  11  121.09   15.60 
   3   1  11  144.59   16.70 
   3  -1  11  164.58   17.10 
   3  -1  11  103.89   14.80 
  -3  -1 -11  151.88   16.30 
  -3  -1 -11  106.09   15.50 
  -3  -1 -11  160.58   15.80 
   3   1  12   31.80   10.60 
  -3   1 -12   42.10   12.10 
  -3   1 -12   42.50   11.80 
   3   1  12   56.39   13.00 
  -3   1 -12   29.40   11.60 
   3  -1  12   25.60   10.90 
   3  -1  12   32.80   12.00 
  -3  -1 -12   42.10   12.80 
  -3  -1 -12   38.80   11.40 
  -3  -1 -12   23.00   10.20 
  -3   1 -13   36.90   11.30 
   3   1  13   29.40   13.50 
  -3   1 -13   34.80   12.20 
   3   1  13   42.40   12.90 
  -3  -1 -13   27.50   12.90 
   3  -1  13   34.40   12.20 
  -3  -1 -13   34.70   11.50 
   3  -1  13   40.30   13.20 
  -3  -1 -13   43.40   12.20 
   3   1  14   -0.30   11.80 
   3   1  14    0.60    9.80 
  -3   1 -14   16.30   10.40 
  -3   1 -14   24.10   12.00 
  -3  -1 -14   13.60   10.80 
  -3  -1 -14   -6.10    9.60 
   3  -1  14   -7.90   11.00 
   3  -1  14   14.10   12.30 
  -3  -1 -14    8.90   12.40 
   3   1  15   -5.20   12.30 
   3   1  15    1.90   11.20 
  -3   1 -15    3.10   11.10 
  -3   1 -15   15.40   11.90 
   3  -1  15    7.60   12.40 
   3  -1  15   11.70   14.60 
  -3  -1 -15   17.50   11.60 
  -3  -1 -15   11.20   11.30 
   3   1  16    3.20   13.40 
  -3   1 -16   32.10   13.40 
   3   1  16   17.50   15.80 
  -3   1 -16   12.50   12.40 
  -3  -1 -16   29.00   13.60 
   3  -1  16   19.90   13.30 
  -3  -1 -16   13.20   11.80 
   3  -1  16   28.60   14.60 
  -3   1 -17   23.80   13.90 
   3   1  17    3.70   13.80 
  -3   1 -17   30.60   13.30 
   3   1  17   34.80   16.10 
   3  -1  17   27.60   15.10 
   3  -1  17   14.90   13.50 
  -3  -1 -17   37.20   14.90 
  -3  -1 -17   27.70   12.90 
  -3   1 -18   12.20   13.00 
   3   1  18   25.80   16.90 
   3   1  18   34.50   18.00 
  -3   1 -18   28.60   12.90 
  -3  -1 -18   31.50   14.20 
   3  -1  18   31.70   16.80 
   3  -1  18    5.70   14.50 
  -3  -1 -18   14.00   12.30 
  -3   1 -19   56.89   16.60 
   3   1  19   50.69   18.80 
   3   1  19    9.00   17.80 
  -3  -1 -19   23.10   13.30 
   3  -1  19   28.00   17.00 
  -3  -1 -19   29.00   13.60 
   3  -1  19   11.50   16.10 
   3   1  20    6.90   18.80 
   3   1  20   17.40   17.90 
  -3   1 -20   -0.30   13.90 
   3  -1  20    1.20   16.80 
  -3  -1 -20   38.20   16.80 
   3  -1  20   38.20   19.30 
   3   3 -20   41.40   17.60 
  -3   3  20   -2.80   18.50 
  -3   3  20   46.50   19.30 
  -3  -3  20  -13.40   17.00 
  -3  -3  20   26.70   14.40 
   3  -3 -20   53.19   15.70 
  -3   3  19   -2.70   14.20 
  -3   3  19  -19.70   15.40 
   3   3 -19   40.40   15.80 
   3  -3 -19  -18.30   10.50 
  -3  -3  19    4.90   13.10 
  -3  -3  19    1.30   16.70 
  -3   3  18   26.80   18.70 
   3   3 -18    5.30   13.10 
  -3   3  18   48.40   16.30 
  -3  -3  18   15.20   17.30 
   3  -3 -18   23.20   12.80 
  -3  -3  18   41.40   15.30 
   3   3 -17   32.70   14.80 
  -3   3  17   -0.30   14.90 
  -3   3  17    0.80   15.60 
   3  -3 -17   41.70   13.80 
  -3  -3  17   44.20   17.80 
  -3  -3  17   29.70   14.40 
  -3   3  16   90.19   19.80 
  -3   3  16  117.09   18.90 
   3   3 -16  147.59   20.50 
  -3  -3  16  118.19   18.00 
  -3  -3  16  101.49   21.00 
   3  -3 -16  103.19   16.90 
  -3   3  15   76.39   18.30 
  -3   3  15   88.19   16.70 
   3   3 -15  110.29   18.30 
   3  -3 -15  104.49   15.20 
  -3  -3  15   83.89   18.70 
  -3  -3  15  104.49   16.10 
   3   3 -14  520.75   30.70 
  -3   3  14  571.34   32.50 
  -3   3  14  549.45   41.90 
  -3  -3  14  512.85   41.00 
   3  -3 -14  554.04   29.50 
  -3  -3  14  520.85   29.50 
   3   3 -13   22.70    8.70 
   3   3 -13   13.60   11.20 
  -3   3  13   16.80   12.70 
  -3   3  13   32.50   12.00 
   3  -3 -13   18.40    9.90 
  -3  -3  13    8.70   12.30 
   3  -3 -13   24.70   10.40 
  -3  -3  13   21.40    9.40 
   3   3 -12  132.09   16.30 
   3   3 -12  118.79   12.30 
  -3   3  12   87.49   16.20 
  -3   3  12  137.09   16.50 
  -3  -3  12   93.29   16.40 
  -3  -3  12  147.29   15.50 
   3  -3 -12  124.89   15.10 
   3  -3 -12  128.99   14.30 
  -3   3  11   42.70   11.10 
  -3   3  11   34.70   12.00 
   3   3 -11   38.30   11.00 
   3   3 -11   43.80    8.40 
   3  -3 -11   63.49   11.70 
  -3  -3  11   43.60    9.70 
   3  -3 -11   28.20    8.60 
  -3  -3  11   25.00   11.00 
  -3   3  10  627.94   30.80 
   3   3 -10  625.54   30.20 
   3   3 -10  631.64   27.20 
  -3   3  10  683.93   38.50 
   3  -3 -10  628.24   28.60 
  -3  -3  10  655.13   38.20 
  -3  -3  10  619.74   28.70 
   3  -3 -10  608.54   29.70 
   3   3  -9   39.40    7.10 
  -3   3   9   46.50    8.70 
   3   3  -9   37.30   10.10 
  -3   3   9   25.30    9.90 
  -3   3   9   50.99   10.10 
   3  -3  -9   43.50    9.30 
   3  -3  -9   44.20    8.30 
  -3  -3   9   47.60    8.60 
  -3  -3   9   19.50    9.30 
  -3  -3   9   36.30    7.60 
   3   3  -8 1847.22   66.79 
  -3   3   8 1811.92   67.29 
   3   3  -8 1738.83   63.39 
  -3   3   8 1890.51   73.89 
  -3   3   8 1861.71   64.59 
  -3  -3   8 1813.92   64.59 
   3  -3  -8 1879.91   67.09 
  -3  -3   8 1741.53   64.39 
  -3  -3   8 1852.31   73.59 
   3  -3  -8 1778.92   64.59 
   3  -3  -8 1872.31   66.69 
   3   3  -7 1102.29   43.80 
   3   3  -7 1283.27   41.30 
  -3   3   7 1152.28   44.00 
   3   3  -7 1144.29   48.90 
   3   3  -7 1007.30   40.30 
  -3   3   7 1066.49   50.09 
  -3   3   7 1260.67   51.09 
  -3   3   7 1113.29   44.10 
   3  -3  -7 1122.79   41.90 
   3  -3  -7 1133.09   49.00 
  -3  -3   7 1140.09   41.50 
   3  -3  -7 1089.59   44.00 
   3  -3  -7 1137.09   43.70 
  -3  -3   7 1142.89   41.80 
  -3  -3   7 1159.18   43.80 
  -3  -3   7 1116.79   49.50 
   3   3  -6  389.16   16.20 
  -3   3   6  382.26   19.70 
  -3   3   6  380.96   17.40 
   3   3  -6  381.26   16.30 
  -3   3   6  400.66   19.40 
   3   3  -6  395.46   19.60 
  -3   3   6  420.86   25.20 
   3   3  -6  425.06   23.40 
  -3   3   6  381.26   24.60 
   3  -3  -6  321.67   18.90 
  -3  -3   6  396.46   19.20 
   3  -3  -6  386.36   17.50 
   3  -3  -6  395.36   19.40 
   3  -3  -6  400.56   23.00 
  -3  -3   6  388.26   17.20 
  -3  -3   6  377.06   23.90 
  -3   3   5  549.95   22.70 
  -3   3   5  599.34   24.70 
  -3   3   5  547.25   29.40 
  -3   3   5  602.64   25.30 
   3   3  -5  554.14   24.70 
  -3   3   5  563.34   24.90 
  -3   3   5  636.54   29.30 
   3   3  -5  555.64   21.40 
   3  -3  -5  578.64   28.50 
   3  -3  -5  588.74   24.80 
  -3  -3   5  565.44   22.40 
  -3  -3   5  605.34   29.10 
   3  -3  -5  575.54   24.90 
  -3   3   4  212.28   16.50 
   3   3  -4  212.48    9.80 
  -3   3   4  231.08   16.30 
  -3   3   4  224.88   13.60 
  -3   3   4  224.28   11.60 
  -3   3   4  242.68   17.20 
   3   3  -4  236.98   15.70 
  -3   3   4  278.77   14.40 
   3   3  -4  236.48   13.60 
  -3  -3   4  230.08   16.50 
  -3  -3   4  225.48   10.90 
   3  -3  -4  219.28   13.20 
   3  -3  -4  219.78   13.50 
  -3  -3   4  221.28   10.70 
  -3   3   3  301.07   15.80 
  -3   3   3  310.67   18.90 
   3   3  -3  321.77   11.90 
  -3   3   3  317.07   15.90 
   3   3  -3  327.97   15.70 
   3   3  -3  331.67   12.00 
  -3   3   3  330.77   20.50 
  -3   3   3  286.67   15.50 
   3   3  -3  348.17   17.80 
   3  -3  -3  300.17   15.70 
   3  -3  -3  297.67   17.30 
   3  -3  -3  312.67   15.60 
  -3  -3   3  316.07   12.70 
  -3  -3   3  333.97   17.90 
  -3  -3   3  324.97   12.70 
  -3  -3   3  345.37   16.10 
  -3   3   2   34.10    5.40 
   3   3  -2   33.60    5.60 
  -3   3   2   71.19    7.90 
  -3   3   2   46.40    7.20 
   3   3  -2   64.99    7.00 
   3   3  -2   57.29    3.90 
   3   3  -2   51.49    3.90 
  -3   3   2   46.10    8.30 
  -3  -3   2   59.79    7.30 
  -3  -3   2   37.10    6.40 
   3  -3  -2   30.50    5.50 
  -3  -3   2   54.39    7.00 
  -3  -3   2   54.89    4.80 
   3  -3  -2   52.39    6.80 
  -3  -3   2   36.10    5.60 
   3  -3  -2   58.79    7.60 
   3  -3  -2   35.00    5.30 
   3  -3  -2   54.49    7.10 
  -3   3   1  781.62   29.50 
  -3   3   1  801.32   32.90 
   3   3  -1  806.42   29.20 
  -3   3   1  786.32   29.50 
  -3   3   1  797.52   28.30 
   3   3  -1  837.42   27.10 
   3   3  -1  746.83   32.00 
  -3   3   1  827.52   32.70 
   3   3  -1  692.53   28.70 
  -3  -3   1  804.42   32.30 
  -3  -3   1  826.22   32.60 
  -3  -3   1  764.32   27.20 
  -3  -3   1  793.42   29.00 
   3  -3  -1  790.92   28.30 
  -3  -3   1  756.62   29.10 
  -3  -3   1  804.62   27.00 
   3  -3  -1  836.92   32.90 
   3  -3  -1  770.12   29.10 
   3  -3  -1  818.62   32.40 
   3  -3  -1  787.72   29.50 
   3   3   0 1802.12   67.69 
   3   3   0 1943.51   65.29 
   3   3   0 1867.71   67.49 
   3   3   0 1924.01   63.39 
   3   3   0 1921.91   63.89 
  -3   3   0 1957.60   67.79 
  -3   3   0 1853.71   64.39 
  -3   3   0 1939.51   68.89 
  -3   3   0 1931.81   65.29 
  -3   3   0 1825.92   64.99 
  -3  -3   0 2017.70   65.29 
   3  -3   0 1905.41   64.49 
  -3  -3   0 2080.29   68.49 
  -3  -3   0 1893.91   63.79 
  -3  -3   0 1913.21   63.59 
  -3  -3   0 2025.30   68.59 
   3  -3   0 1886.41   68.29 
   3  -3   0 1908.11   67.79 
   3  -3   0 1898.81   65.39 
  -3  -3   0 1907.61   63.99 
  -3   3  -1 1724.83   56.99 
   3   3   1 1685.13   56.29 
  -3   3  -1 1674.63   56.79 
   3   3   1 1544.15   59.19 
   3   3   1 1614.84   55.99 
  -3   3  -1 1757.92   62.19 
  -3   3  -1 1731.73   55.89 
  -3  -3  -1 1643.74   60.29 
  -3  -3  -1 1413.96   58.89 
   3  -3   1 1633.64   56.59 
   3  -3   1 1786.42   61.79 
  -3  -3  -1 1619.64   56.39 
   3  -3   1 1658.23   56.69 
   3  -3   1 1674.03   56.99 
  -3  -3  -1 1638.94   56.29 
   3  -3   1 1714.83   55.79 
  -3   3  -2 9187.38  303.47 
  -3   3  -2 9448.95  302.87 
   3   3   2 9139.79  296.97 
  -3   3  -2 9222.38  297.97 
   3   3   2 8982.80  297.77 
   3   3   2 8938.31  297.87 
   3   3   2 9999.00  301.67 
  -3   3  -2 8892.11  297.77 
   3  -3   2 8995.10  297.87 
   3  -3   2 9164.88  298.07 
  -3  -3  -2 9085.89  298.07 
   3  -3   2 9236.18  301.27 
  -3  -3  -2 9217.18  302.67 
  -3  -3  -2 8916.61  297.97 
  -3  -3  -2 9146.68  301.17 
   3  -3   2 9126.29  303.37 
   3   3   3 1308.37   46.50 
   3   3   3 1287.77   44.70 
  -3   3  -3 1274.47   45.80 
  -3   3  -3 1293.17   52.89 
   3   3   3 1280.47   46.30 
  -3   3  -3 1293.77   45.90 
  -3   3  -3 1287.17   47.20 
   3   3   3 1334.17   50.69 
  -3  -3  -3 1372.36   50.19 
   3  -3   3 1276.67   47.10 
  -3  -3  -3 1275.67   46.40 
   3  -3   3 1263.27   46.00 
  -3  -3  -3 1310.97   46.60 
  -3  -3  -3 1278.47   51.79 
   3  -3   3 1281.27   46.10 
   3  -3   3 1288.77   52.29 
  -3   3  -4  203.48   12.40 
   3   3   4  175.38   17.40 
  -3   3  -4  228.48   12.70 
   3   3   4  226.48   12.80 
  -3   3  -4  220.88   15.40 
   3   3   4  213.68   17.90 
   3   3   4  208.38   12.70 
   3   3   4  241.08   13.30 
  -3  -3  -4  222.78   14.00 
   3  -3   4  200.38   12.50 
  -3  -3  -4  222.18   18.20 
   3  -3   4  224.38   15.40 
  -3  -3  -4  229.88   19.80 
   3  -3   4  206.38   12.80 
  -3  -3  -4  200.78   13.50 
  -3   3  -5   16.70    5.80 
  -3   3  -5   26.00    8.00 
   3   3   5   16.10    5.00 
   3   3   5   16.10    7.40 
   3   3   5   18.70    7.60 
  -3   3  -5   29.20    6.50 
   3   3   5    9.70    5.30 
   3   3   5   -3.10    5.00 
  -3   3  -5   18.40    6.50 
  -3  -3  -5   25.70    6.60 
   3  -3   5   22.60    6.60 
   3  -3   5   20.40    7.10 
   3  -3   5   18.40    5.80 
  -3  -3  -5   23.40    7.90 
  -3  -3  -5   17.80    8.10 
  -3   3  -6  156.08   16.00 
   3   3   6  194.88   14.30 
   3   3   6  169.18   13.30 
   3   3   6  164.98   12.90 
   3   3   6  160.08   19.00 
  -3   3  -6  169.68   12.50 
  -3   3  -6  148.49   13.30 
  -3   3  -6  145.19   12.90 
   3  -3   6  166.38   13.00 
   3  -3   6  174.48   16.40 
  -3  -3  -6  174.48   20.70 
  -3  -3  -6  173.18   13.60 
   3  -3   6  150.88   13.00 
  -3  -3  -6  166.28   13.80 
  -3   3  -7   13.10    7.60 
   3   3   7   29.40    9.20 
   3   3   7   18.60    9.20 
  -3   3  -7   32.30    7.80 
  -3   3  -7   29.30    8.80 
   3   3   7   15.30    6.70 
   3   3   7   20.20    7.20 
   3   3   7   12.50    8.60 
  -3   3  -7   20.60    7.10 
   3  -3   7   14.80    8.60 
  -3  -3  -7   24.50    8.30 
   3  -3   7    9.20    7.00 
  -3  -3  -7   24.40    9.80 
   3  -3   7   24.60    7.70 
  -3  -3  -7   31.40    8.10 
  -3  -3  -7   17.80    8.50 
   3  -3   7   29.50    8.10 
   3   3   8  121.49   13.60 
  -3   3  -8   58.99   10.90 
   3   3   8   70.49    9.90 
  -3   3  -8   86.39   12.00 
   3   3   8   61.49    9.90 
  -3   3  -8   97.39   10.90 
  -3  -3  -8  101.79   12.70 
   3  -3   8   96.29   11.90 
  -3  -3  -8  113.29   11.30 
  -3  -3  -8  100.09   12.30 
   3  -3   8   54.59   10.60 
  -3  -3  -8   77.39   12.40 
  -3   3  -9   15.00    8.10 
  -3   3  -9   29.20    9.00 
   3   3   9   30.60   10.30 
  -3   3  -9   32.10    8.50 
   3   3   9   11.90    7.60 
  -3  -3  -9   17.40    9.90 
   3  -3   9   19.60    8.30 
  -3  -3  -9   24.30    9.20 
   3  -3   9   30.50    9.60 
  -3  -3  -9   27.00    9.10 
  -3  -3  -9   27.30    8.60 
   3   3  10  222.48   18.90 
  -3   3 -10  209.18   23.10 
  -3   3 -10  230.08   17.10 
   3   3  10  237.88   20.90 
  -3   3 -10  212.48   17.60 
  -3  -3 -10  218.98   18.00 
  -3  -3 -10  212.58   15.60 
   3  -3  10  221.98   22.50 
  -3  -3 -10  211.38   26.20 
   3  -3  10  221.38   17.80 
  -3   3 -11   17.30    9.30 
  -3   3 -11    4.00    9.60 
   3   3  11   26.70   11.10 
   3   3  11    0.30    8.40 
  -3  -3 -11   14.20   11.10 
  -3  -3 -11   24.50    8.70 
  -3  -3 -11   17.30   10.00 
   3  -3  11   16.20   10.70 
   3  -3  11   25.90   10.00 
   3   3  12   51.29   12.30 
  -3   3 -12   75.69   12.00 
  -3   3 -12   66.89   12.20 
   3   3  12   60.19   14.60 
  -3  -3 -12   75.19   14.10 
  -3  -3 -12   63.59   12.10 
  -3  -3 -12   51.89   14.80 
   3  -3  12   42.20   12.20 
   3  -3  12   54.79   13.00 
  -3   3 -13   26.10   10.90 
   3   3  13   13.00   11.10 
  -3   3 -13   26.90   11.80 
   3   3  13   23.40   12.90 
  -3  -3 -13   36.20   12.40 
   3  -3  13   24.20   11.70 
  -3  -3 -13   32.20   11.60 
  -3  -3 -13   10.00   12.60 
   3  -3  13    4.40    9.70 
   3   3  14   55.49   15.00 
   3   3  14   19.50   12.40 
  -3   3 -14   30.50   10.60 
  -3   3 -14   40.40   13.60 
   3  -3  14   -0.30   10.90 
  -3  -3 -14   23.70   12.90 
  -3  -3 -14   34.40   12.70 
   3  -3  14   48.20   14.10 
  -3  -3 -14   36.90   15.10 
   3   3  15   15.50   12.40 
   3   3  15   13.90   13.30 
  -3   3 -15   19.10   11.20 
  -3   3 -15   17.50   12.50 
  -3  -3 -15    2.50   11.10 
  -3  -3 -15   27.20   12.50 
   3  -3  15   -2.00   12.80 
  -3  -3 -15   19.60   14.20 
   3  -3  15   12.90   12.30 
   3   3  16   33.90   15.70 
  -3   3 -16   21.80   13.40 
   3   3  16   17.60   13.50 
  -3   3 -16   25.70   12.20 
   3  -3  16   29.50   14.80 
   3  -3  16   23.70   14.20 
  -3  -3 -16   28.40   13.30 
  -3  -3 -16   28.40   12.40 
   3   3  17   30.60   15.60 
  -3   3 -17   21.40   12.10 
  -3   3 -17   32.20   14.90 
   3   3  17   20.10   15.10 
   3  -3  17   67.39   17.00 
  -3  -3 -17   33.90   12.60 
   3  -3  17   31.00   15.10 
  -3  -3 -17   20.60   14.70 
   3   3  18   13.70   16.20 
   3   3  18   16.40   15.90 
  -3   3 -18   41.60   17.10 
   3  -3  18   38.90   17.60 
  -3  -3 -18   54.29   17.20 
   3  -3  18   73.09   19.00 
  -3  -3 -18   59.19   15.10 
   3   3  19   26.30   17.50 
  -3   3 -19   -6.20   13.40 
   3   3  19   -5.80   15.30 
   3  -3  19   12.00   15.20 
  -3  -3 -19   43.90   15.90 
  -3  -3 -19   12.20   14.60 
   3  -3  19   -3.70   14.90 
   3   3  20  -16.40   16.50 
  -3   3 -20   14.30   14.00 
  -3  -3 -20   -4.80   13.70 
   3  -3  20   -0.40   15.40 
   3   5 -20   40.30   16.80 
  -3   5  20   16.50   17.30 
  -3   5  20   -4.40   19.30 
  -3  -5  20   24.30   14.30 
  -3  -5  20  -16.00   17.50 
   3   5 -19   39.80   16.20 
  -3   5  19    5.20   16.30 
  -3   5  19  -27.20   16.30 
  -3  -5  19    5.70   13.50 
  -3  -5  19  -14.00   16.40 
   3  -5 -19   16.70   12.00 
   3   5 -18   51.29   16.10 
  -3   5  18    4.60   17.50 
  -3   5  18   12.30   14.60 
   3  -5 -18    5.30   12.20 
  -3  -5  18    8.90   16.70 
  -3  -5  18   10.40   14.00 
  -3   5  17   42.60   15.70 
   3   5 -17   37.90   15.90 
  -3   5  17   15.00   16.70 
  -3  -5  17   24.50   13.90 
   3  -5 -17   11.00   12.30 
  -3  -5  17   13.00   15.70 
  -3   5  16  131.49   20.30 
  -3   5  16   92.79   21.00 
   3   5 -16  126.79   20.00 
  -3  -5  16  120.19   22.00 
   3  -5 -16  122.19   16.30 
  -3  -5  16  127.69   18.40 
   3   5 -15   31.50   14.40 
  -3   5  15   39.40   14.40 
  -3   5  15   15.30   15.20 
  -3  -5  15    3.70   13.50 
   3  -5 -15   50.39   12.20 
  -3  -5  15   17.70   11.40 
  -3   5  14  285.87   33.00 
   3   5 -14  246.98   20.60 
  -3   5  14  278.27   24.30 
   3  -5 -14  279.07   19.40 
  -3  -5  14  287.97   32.80 
  -3  -5  14  342.97   22.50 
   3   5 -13  245.78   16.90 
  -3   5  13  262.27   30.70 
   3   5 -13  280.77   22.50 
  -3   5  13  284.67   23.50 
  -3  -5  13  267.37   20.00 
   3  -5 -13  269.67   21.60 
   3  -5 -13  324.27   19.80 
  -3  -5  13  258.27   27.70 
   3   5 -12    0.20    5.60 
  -3   5  12   11.90   11.40 
   3   5 -12   16.00   10.40 
  -3   5  12   18.20   10.80 
  -3  -5  12    7.90   11.00 
  -3  -5  12   10.10    8.40 
   3  -5 -12   -0.60    7.50 
   3  -5 -12   12.20    9.60 
  -3   5  11   52.39   13.70 
  -3   5  11   67.99   13.00 
   3   5 -11   97.39   14.30 
  -3  -5  11   86.49   11.10 
   3  -5 -11  100.49   13.70 
   3  -5 -11   79.59   10.90 
  -3  -5  11   56.69   13.10 
  -3   5  10  218.78   18.40 
   3   5 -10  221.18   18.00 
  -3   5  10  250.97   25.40 
  -3   5  10  251.97   15.10 
   3  -5 -10  231.08   15.20 
   3  -5 -10  229.48   17.90 
  -3  -5  10  285.37   25.70 
  -3  -5  10  232.78   15.60 
  -3   5   9  577.94   23.70 
   3   5  -9  527.75   26.70 
  -3   5   9  542.85   34.00 
  -3   5   9  563.84   27.80 
   3   5  -9  447.36   21.00 
   3  -5  -9  528.95   23.50 
  -3  -5   9  531.15   23.70 
   3  -5  -9  490.05   26.50 
  -3  -5   9  518.45   32.70 
  -3  -5   9  574.14   23.80 
   3   5  -8 1851.11   62.99 
   3   5  -8 1824.12   67.99 
  -3   5   8 1856.01   75.09 
  -3   5   8 1789.92   68.39 
   3  -5  -8 1988.60   68.89 
  -3  -5   8 1838.72   64.39 
   3  -5  -8 1843.12   68.19 
  -3  -5   8 1854.01   64.79 
   3  -5  -8 1778.92   64.59 
  -3  -5   8 1832.82   74.49 
   3   5  -7   14.20    8.00 
  -3   5   7   19.70    9.30 
  -3   5   7    7.40    7.50 
   3   5  -7   18.50    3.70 
  -3   5   7   12.80    8.20 
  -3   5   7   11.60    5.00 
  -3  -5   7    1.90    5.60 
  -3  -5   7   14.80    5.00 
   3  -5  -7   29.00    8.60 
   3  -5  -7   17.00    7.50 
   3  -5  -7   11.40    7.30 
  -3  -5   7   11.30    5.30 
   3   5  -6  427.16   20.90 
  -3   5   6  414.36   17.50 
   3   5  -6  366.16   15.00 
  -3   5   6  403.56   23.40 
   3   5  -6  428.56   15.40 
  -3   5   6  423.46   27.10 
  -3   5   6  434.16   26.40 
  -3   5   6  399.66   21.10 
  -3  -5   6  390.06   24.90 
   3  -5  -6  422.16   25.00 
   3  -5  -6  411.16   20.90 
  -3  -5   6  438.96   22.20 
   3  -5  -6  374.46   20.90 
  -3  -5   6  414.66   17.10 
   3   5  -5  534.65   23.30 
  -3   5   5  502.25   28.50 
  -3   5   5  499.35   19.70 
   3   5  -5  460.35   16.70 
  -3   5   5  495.75   25.60
[truncated: 1,600,167 more chars]
